# Supplementary material
Source: publisher site journal article supplement (https://www.dovepress.com/article/536790)
Supplement: Supplementary file 1 [file 536790%20Revised%20Supplementary%20Materials.docx]

**Supplementary box 1**: MEMBRANE gene set

| lipid metabolism-related gene |
| --- |
| | A4GNT | | --- | | AAAS | | AADAC | | ABCA1 | | ABCA2 | | ABCA3 | | ABCA7 | | ABCB1 | | ABCB11 | | ABCB4 | | ABCB7 | | ABCB8 | | ABCC1 | | ABCC2 | | ABCC3 | | ABCC4 | | ABCC5 | | ABCC6 | | ABCD2 | | ABCD3 | | ABCD4 | | ABCF2 | | ABCG1 | | ABCG2 | | ABRA | | ASIC2 | | ASIC1 | | ASIC3 | | ASIC4 | | ACE | | ACP2 | | ACP5 | | ACTL6A | | ACTN1 | | ACTN2 | | ACTN3 | | ACVR1 | | ACVR1B | | ACVR1C | | ACVR2A | | ACVR2B | | ACVRL1 | | ADAM11 | | ADAM12 | | ADAM17 | | ADAM2 | | ADAM23 | | ADAM29 | | ADAM30 | | ADAM8 | | ADAM9 | | ADCY3 | | ADCY7 | | ADCY8 | | ADCY9 | | ADCYAP1R1 | | ADI1 | | ADORA1 | | ADORA2A | | ADORA2B | | ADORA3 | | ADRA1A | | ADRA1B | | ADRA1D | | ADRA2A | | ADRA2B | | ADRA2C | | ADRB1 | | ADRB2 | | ADRB3 | | ADRM1 | | AFTPH | | AGER | | AGPAT3 | | AGTR1 | | AGTR2 | | APLNR | | AIFM2 | | AIFM3 | | AKAP7 | | AKT1 | | AKTIP | | ALAS2 | | ALG3 | | ALK | | ALOX12 | | AMBP | | AMFR | | AMOTL1 | | AMTN | | ANKFY1 | | ANKH | | ANKRA2 | | ANKRD20A1 | | ANPEP | | ANXA2 | | AOC3 | | AP1G2 | | SYNRG | | AP1S1 | | AP2S1 | | AP3S1 | | APC | | APC2 | | APH1A | | APH1B | | APOM | | APP | | AQP1 | | AQP2 | | AQP4 | | AQP5 | | AQP6 | | AQP7 | | AQP8 | | AQP9 | | ARCN1 | | ARF1 | | ARF6 | | ARFGEF2 | | ARFIP1 | | ARFIP2 | | ARHGEF1 | | ARL6 | | ARL6IP5 | | ARRB1 | | ARRB2 | | ART1 | | ART3 | | ASGR1 | | ASH1L | | ASPH | | ATF6 | | ATP12A | | ATP1A1 | | ATP1A2 | | ATP1A3 | | ATP1A4 | | ATP1B1 | | ATP1B3 | | ATP1B4 | | ATP2A2 | | ATP2B1 | | ATP2B3 | | ATP2B4 | | ATP2C1 | | ATP4A | | ATP5F1A | | ATP5F1B | | ATP5F1C | | ATP5F1D | | ATP5F1E | | ATP5MC1 | | ATP5MC2 | | ATP5MC3 | | ATP5PF | | ATP5PO | | ATP6AP1 | | ATP6AP2 | | ATP6V0A4 | | ATP6V0B | | ATP6V0C | | ATP6V1A | | ATP6V1B1 | | ATP6V1C1 | | ATP6V1E1 | | ATP6V1F | | ATP7A | | ATP7B | | ATP8B1 | | ATRN | | AVPR1A | | AVPR1B | | AVPR2 | | AXIN1 | | AXL | | B3GAT1 | | B3GNT3 | | B4GALT1 | | B4GALT4 | | B4GALT7 | | BACE1 | | ADGRB1 | | ADGRB2 | | ADGRB3 | | BAIAP2 | | BAK1 | | BAMBI | | BASP1 | | BAX | | BCAM | | BCAP31 | | BCAR1 | | BCL10 | | BCL2 | | BCL2L13 | | BCS1L | | BDKRB1 | | BDKRB2 | | BEST1 | | BET1 | | BET1L | | BFAR | | BMPR1A | | BMPR2 | | BNIP1 | | BNIP2 | | BNIP3 | | BNIP3L | | BPI | | BRS3 | | BSCL2 | | BSND | | BST1 | | BST2 | | BTK | | BTN1A1 | | BTN2A1 | | VPS51 | | C1GALT1 | | C1QBP | | C3AR1 | | TAMM41 | | C5AR1 | | MPIG6B | | C7 | | C8A | | C8B | | C9 | | TMEM8B | | AIF1L | | CA12 | | CA14 | | CA9 | | CACNA1A | | CACNA1B | | CACNA1C | | CACNA1D | | CACNA1E | | CACNA1F | | CACNA1G | | CACNA1H | | CACNA1S | | CACNA2D1 | | CACNB1 | | CACNB2 | | CACNB3 | | CACNB4 | | CACNG1 | | CACNG2 | | CACNG4 | | CADM1 | | CADM3 | | CALCRL | | CALM3 | | CALY | | CAPRIN1 | | CARD11 | | CASK | | CASP7 | | CASR | | CAV1 | | CAV2 | | CAV3 | | CBL | | CBX5 | | ACKR2 | | CCDC70 | | CCDC8 | | CCDC88A | | CCKAR | | CCKBR | | CCR1 | | CCR10 | | CCR2 | | CCR3 | | CCR4 | | CCR5 | | CCR6 | | CCR7 | | CCR8 | | CCR9 | | ACKR4 | | CCRL2 | | CD14 | | CD151 | | CD160 | | CD163 | | CD164 | | CD19 | | CD1B | | CD1C | | CD1D | | CD200 | | CD22 | | CD226 | | CD24 | | CD247 | | CD28 | | CD300C | | CD33 | | CD36 | | CD37 | | CD38 | | CD3E | | CD4 | | CD40 | | CD40LG | | CD46 | | CD47 | | CD48 | | CD5 | | CD52 | | CD53 | | CD55 | | CD6 | | CD63 | | CD68 | | CD69 | | CD7 | | CD70 | | CD72 | | CD74 | | CD79A | | CD79B | | CD81 | | CD82 | | CD83 | | CD84 | | CD8B | | CD96 | | ADGRE5 | | CD99 | | CDC42 | | CDC42BPA | | CDC42BPB | | CDC42EP2 | | CDC42SE1 | | CDC42SE2 | | CDH1 | | CDH13 | | CDH15 | | CDH24 | | CDH5 | | CDK5 | | CDK5R1 | | CEACAM4 | | CEACAM5 | | CEACAM6 | | CEACAM7 | | CEACAM8 | | CELSR1 | | CELSR3 | | CENPF | | ADAP1 | | ADAP2 | | CEPT1 | | CFTR | | CHL1 | | CHMP1A | | CHRM1 | | CHRM2 | | CHRM3 | | CHRM4 | | CHRM5 | | CHRNA1 | | CHRNA2 | | CHRNA3 | | CHRNA4 | | CHRNA6 | | CHRNA7 | | CHRNB2 | | CHRNB3 | | CHRNB4 | | CHRND | | CHRNE | | CHRNG | | CHST7 | | CIB1 | | CKAP4 | | CKLF | | CLCA1 | | CLCA2 | | CLCA4 | | CLCN1 | | CLCN3 | | CLCN5 | | CLCNKA | | CLCNKB | | CLDN1 | | CLDN10 | | CLDN11 | | CLDN12 | | CLDN14 | | CLDN15 | | CLDN16 | | CLDN17 | | CLDN18 | | CLDN19 | | CLDN2 | | CLDN20 | | CLDN22 | | CLDN23 | | CLDN3 | | CLDN4 | | CLDN5 | | CLDN6 | | CLDN7 | | CLDN8 | | CLDN9 | | CLEC10A | | CLEC1A | | CLEC1B | | CLEC2B | | CLEC2D | | CLEC4A | | CLEC4M | | CLEC5A | | CLEC7A | | CLN3 | | CLN5 | | CLNS1A | | CLPTM1 | | CMKLR1 | | CNGA1 | | CNIH2 | | CNKSR1 | | CNN2 | | CNPY2 | | CNR1 | | CNR2 | | CNTFR | | CNTN2 | | CNTNAP1 | | COG2 | | COL13A1 | | COL17A1 | | COLEC12 | | COPA | | COPB1 | | COPB2 | | COPE | | COPG1 | | COPG2 | | COPZ1 | | CORIN | | CORO1A | | COX15 | | COX18 | | COX6B2 | | CPE | | CPM | | CR1 | | CRHR1 | | CRHR2 | | CRIM1 | | CRNN | | CRTAM | | CSF1R | | CSF2RA | | CSF2RB | | CSF3R | | CSK | | CSNK2A1 | | CSPG4 | | CSPG5 | | CCN2 | | CTLA4 | | CTNNA3 | | CTNNB1 | | CTNS | | CUBN | | CUTA | | CUZD1 | | CX3CL1 | | CX3CR1 | | CXADR | | CXCR3 | | CXCR4 | | CXCR5 | | CXCR6 | | CYB561 | | CYB5R2 | | CYB5R3 | | CYBB | | CYSLTR1 | | DAB2 | | DAD1 | | DAG1 | | ACKR1 | | OSTC | | DCBLD2 | | DCLK1 | | DCT | | DDOST | | DDR1 | | DDR2 | | DDX19B | | DEGS1 | | DERL1 | | DERL2 | | DERL3 | | DGKD | | DGKK | | DHCR7 | | DHRS9 | | DKK1 | | DLG1 | | DLG2 | | DLG4 | | DLK1 | | DMBT1 | | DMD | | DNER | | DNM2 | | DOLPP1 | | DOP1A | | DOP1B | | DPM1 | | DPM2 | | DPM3 | | DRD1 | | DRD2 | | DRD3 | | DRD4 | | DRD5 | | DSC1 | | DSC3 | | DSCAM | | DST | | DTNBP1 | | CTDNEP1 | | DYSF | | GPR183 | | EBI3 | | EBP | | ECE1 | | ECE2 | | ECEL1 | | EDA | | EDEM1 | | S1PR1 | | LPAR1 | | S1PR3 | | LPAR2 | | S1PR4 | | LPAR3 | | EDNRA | | EDNRB | | EEA1 | | EFNA1 | | EFNA3 | | EFNA4 | | EFNA5 | | EFNB1 | | EFNB2 | | EFNB3 | | EGF | | EGFR | | EIF2B1 | | EIF5A | | ELMO1 | | ADGRL4 | | EMCN | | EMD | | EMP1 | | EMP2 | | ADGRE1 | | ADGRE2 | | ADGRE3 | | ADGRE4P | | ENG | | ENOX2 | | ENPEP | | ENPP1 | | ENPP2 | | ENPP3 | | ENTPD1 | | ENTPD4 | | EPB41 | | EPB41L2 | | EPB41L3 | | EPB42 | | EPC1 | | EPGN | | EPHA1 | | EPHA2 | | EPHA3 | | EPHA4 | | EPHA5 | | EPHA8 | | EPHB1 | | EPHB2 | | EPHB3 | | EPHB4 | | EPOR | | EPS15 | | ERBIN | | ERBB3 | | ERBB4 | | ERC1 | | ERC2 | | EREG | | ERLIN1 | | ERLIN2 | | ERMAP | | ERN1 | | EVI2B | | EVL | | EXT1 | | EXT2 | | EZR | | F11R | | F2R | | F2RL1 | | F2RL2 | | F2RL3 | | F3 | | FADS2 | | LRATD2 | | FASLG | | FAT1 | | FCAR | | FCER1A | | FCER1G | | FCER2 | | FCGR3A | | FDFT1 | | MYOF | | FFAR1 | | FFAR2 | | FFAR3 | | FGFR1 | | FGFR3 | | FGFR4 | | FIS1 | | FLOT1 | | FLT1 | | FLT3 | | FLT4 | | FLVCR1 | | FOLH1 | | FOLR1 | | FOLR3 | | FPR1 | | FPR2 | | FPR3 | | PGAP2 | | MTOR | | FRS2 | | FRZB | | FSHR | | FUT1 | | FUT7 | | FXYD1 | | FXYD3 | | FXYD5 | | FXYD6 | | FYN | | FZD10 | | FZD2 | | FZD3 | | FZD4 | | FZD5 | | FZD6 | | FZD7 | | FZD8 | | FZD9 | | GABARAP | | GABBR1 | | GABBR2 | | GABRA1 | | GABRA2 | | GABRA3 | | GABRA4 | | GABRA5 | | GABRA6 | | GABRB1 | | GABRB2 | | GABRB3 | | GABRD | | GABRE | | GABRG2 | | GABRQ | | GABRR1 | | GABRR2 | | GAL3ST1 | | GAL3ST2 | | GALNT3 | | GALR1 | | GALR2 | | GALR3 | | GAS1 | | GBA2 | | NIPSNAP2 | | GCA | | GCGR | | GCNT1 | | GFRA2 | | GFRA3 | | GGCX | | GGT5 | | GHR | | GHRHR | | GHSR | | GIPC1 | | GIPR | | GJA1 | | GJA4 | | GJA8 | | GJB1 | | GJB2 | | GJD3 | | GLE1 | | GLG1 | | GLP1R | | GLP2R | | GLRA1 | | GML | | GNA11 | | GNA14 | | GNA15 | | GNAI1 | | GNAQ | | GNAS | | GNAZ | | GNG4 | | GNRHR | | GOLGA3 | | GOLGA5 | | GOLGB1 | | GOLIM4 | | GOLM1 | | GOSR1 | | GOT2 | | GP1BA | | GP5 | | GP6 | | GP9 | | GPA33 | | GPAA1 | | GPC1 | | GPC3 | | GPC4 | | GPC5 | | GPC6 | | GPER1 | | GPNMB | | CMKLR2 | | HCAR3 | | ADGRF1 | | ADGRF2P | | ADGRG4 | | ADGRF3 | | ADGRG5 | | ADGRF4 | | ADGRF5 | | GPR12 | | ADGRA1 | | ADGRA2 | | ADGRA3 | | ADGRG6 | | ADGRG7 | | ADGRD1 | | GPR135 | | GPR137B | | GPR143 | | ADGRD2 | | GPR15 | | GPR17 | | TPRA1 | | GPR176 | | GPR182 | | GPR19 | | GPR20 | | GPR21 | | GPR22 | | LPAR4 | | GPR25 | | GPR3 | | GPR31 | | GPR32 | | GPR34 | | GPR35 | | GPR37 | | GPR39 | | GPR4 | | GPR42 | | PTGDR2 | | GPR45 | | GPR50 | | GPR52 | | GPR55 | | ADGRG1 | | GPR6 | | ADGRG2 | | GPR65 | | GPR68 | | GPR75 | | ADGRG3 | | ADGRV1 | | GPRC5A | | GPRC5C | | GRB10 | | GRIA1 | | GRIA2 | | GRIA3 | | GRIA4 | | GRID2 | | GRIK1 | | GRIK2 | | GRIK3 | | GRIK4 | | GRIN1 | | GRIN2A | | GRIN2B | | GRIN2C | | POLR2M | | GRM1 | | GRM2 | | GRM3 | | GRM4 | | GRM5 | | GRM6 | | GRM7 | | GRM8 | | GRPR | | GUCY2D | | GUCY2F | | GYPA | | GYPB | | GYPC | | GYPE | | GZMA | | GZMB | | HAS1 | | HAS2 | | HAS3 | | HBEGF | | HCCS | | HCN2 | | HCRTR1 | | HCRTR2 | | HDAC11 | | HDLBP | | HERPUD1 | | HFE | | HLA | | DOA | | HLA | | DRA | | HLA | | DRB3 | | HLA | | DRB4 | | HLA | | DRB5 | | HMGCR | | HNRNPM | | HOMER1 | | HPN | | HPS1 | | HRAS | | AGFG1 | | HRH1 | | HRH2 | | HRH3 | | HS3ST1 | | HS3ST2 | | HS3ST3A1 | | HS3ST3B1 | | HS6ST1 | | HSD17B10 | | HSD17B2 | | HSD3B1 | | HSD3B2 | | HSP90B1 | | HTATIP2 | | HTR1A | | HTR1B | | HTR1D | | HTR1E | | HTR1F | | HTR2A | | HTR2B | | HTR3A | | HTR3B | | HTR4 | | HTR5A | | HTR6 | | HTR7 | | HTRA2 | | HVCN1 | | ICA1 | | ICAM1 | | ICAM2 | | ICAM3 | | ICAM4 | | ICAM5 | | IFITM1 | | IFITM3 | | IFNAR1 | | IFNAR2 | | IFNGR1 | | IFNGR2 | | IGF2R | | IGSF1 | | CD101 | | IGSF6 | | IGSF8 | | IL10RA | | IL10RB | | IL11RA | | IL12RB1 | | IL12RB2 | | IL13RA1 | | IL15 | | IL17RB | | IL18R1 | | IL1R1 | | IL1RAP | | IL1RL2 | | IL27RA | | IFNLR1 | | IFNL1 | | IL2RA | | IL2RB | | IL2RG | | IL4R | | IL5RA | | IL6R | | IL6ST | | CXCR2 | | IL9R | | IMMT | | INSR | | IPO7 | | IRS4 | | ITGA1 | | ITGA10 | | ITGA11 | | ITGA2 | | ITGA3 | | ITGA5 | | ITGA8 | | ITGA9 | | ITGAD | | ITGAE | | ITGAM | | ITGAX | | ITGB1 | | ITGB3 | | ITGB4 | | ITGB6 | | ITGB7 | | ITGB8 | | ITLN1 | | ITPR1 | | ITPR2 | | ITPR3 | | IZUMO1 | | JAG2 | | JTB | | KCNA1 | | KCNA2 | | KCNA3 | | KCNA4 | | KCNA5 | | KCNA6 | | KCNB2 | | KCNC1 | | KCNC3 | | KCNC4 | | KCND3 | | KCNE1 | | KCNE5 | | KCNE2 | | KCNG2 | | KCNG3 | | KCNH1 | | KCNH2 | | KCNH4 | | KCNJ1 | | KCNJ10 | | KCNJ11 | | KCNJ14 | | KCNJ15 | | KCNJ2 | | KCNJ3 | | KCNJ4 | | KCNJ5 | | KCNJ6 | | KCNJ8 | | KCNK1 | | KCNK3 | | KCNK5 | | KCNK6 | | KCNMA1 | | KCNMB2 | | KCNMB3 | | KCNMB4 | | KCNN1 | | KCNN3 | | KCNN4 | | KCNQ1 | | KCNQ2 | | KCNQ3 | | KCNQ5 | | KCNS1 | | KDELR1 | | KDELR2 | | KDR | | KEL | | KHDRBS1 | | KIF1B | | KIR2DL1 | | KIR2DL3 | | KIR2DL4 | | KIR2DS3 | | KIR2DS4 | | KIR3DL2 | | KIRREL3 | | KISS1R | | KL | | KLRA1P | | KLRB1 | | KLRC1 | | KLRC2 | | KLRD1 | | KLRF1 | | KLRG1 | | KLRK1 | | KPNA1 | | KPNA3 | | KPNB1 | | KRT1 | | KRTCAP2 | | KTN1 | | L2HGDH | | L3MBTL4 | | LAMB1 | | LAMC3 | | LAMP1 | | LAMP2 | | LAMP3 | | LANCL1 | | LANCL2 | | LAPTM5 | | LARGE1 | | LAT | | LAT2 | | LAX1 | | LAYN | | LBR | | LCK | | LCT | | LDLR | | LDLRAP1 | | LEMD3 | | LETM1 | | LGALS3 | | LGALS4 | | ZACN | | LGR5 | | LHCGR | | LIFR | | LILRA3 | | LILRB1 | | LILRB2 | | LILRB3 | | LIMA1 | | LMAN1 | | LMAN2L | | LMNB1 | | LMTK2 | | LNPEP | | ADGRL1 | | ADGRL2 | | ADGRL3 | | LRIT1 | | IRAG2 | | LRP1 | | LRP12 | | LRP3 | | LRP5 | | LRP6 | | LRPAP1 | | LRRC32 | | LRRC4C | | LSR | | LST1 | | LTB4R | | LTB4R2 | | LTC4S | | LTK | | LY6E | | LY75 | | LY86 | | LY96 | | LYN | | LYPD3 | | LYVE1 | | M6PR | | MADD | | MAEA | | MAGEA1 | | MAGEE1 | | MAGI1 | | MAGT1 | | MAL | | MALL | | MAN1A2 | | MAN1B1 | | MAN1C1 | | MAP1LC3A | | MAP1LC3B | | MAP1LC3C | | MAP3K12 | | MAP4K2 | | MAPT | | MARCKSL1 | | MARCO | | MAS1 | | MATR3 | | MBTPS2 | | MC1R | | MC2R | | MC3R | | MC4R | | MC5R | | MCHR1 | | MCL1 | | MCTP1 | | MCTP2 | | MDGA1 | | MEP1A | | MEP1B | | MERTK | | MET | | MELTF | | MFN2 | | MFRP | | MGAT1 | | MGAT3 | | MIP | | GDE1 | | MLANA | | AFDN | | MLNR | | MMD | | MME | | MMP14 | | MMP15 | | MMP16 | | MMP17 | | MMP24 | | MPL | | MPP1 | | MPP2 | | MPP3 | | MPV17 | | MPZ | | MPZL1 | | MRAS | | MRC1 | | MRPL19 | | MRPL32 | | IRAG1 | | MS4A1 | | MS4A2 | | MSN | | MSR1 | | MST1R | | MSTO1 | | MTFR1 | | MTNR1A | | MTNR1B | | MTX1 | | MTX2 | | MUC1 | | MUC16 | | MUC20 | | MUC4 | | MUSK | | MYH9 | | MYO16 | | MYO1A | | MYO1C | | MYO6 | | MYO7A | | NAGPA | | NAPSB | | NARF | | NBEA | | NCAM1 | | NCAM2 | | NCF4 | | NCKAP1L | | NCR2 | | NCR3 | | NCSTN | | MT | | ND1 | | NDST2 | | NDUFA1 | | NDUFA13 | | NDUFA2 | | NDUFA6 | | NDUFA9 | | NDUFAB1 | | NDUFB6 | | NDUFS1 | | NDUFS2 | | NDUFS3 | | NDUFS4 | | NDUFS7 | | NDUFS8 | | NDUFV1 | | NECAB3 | | NECAP2 | | NEO1 | | NEU3 | | NEU4 | | NEXN | | NF2 | | NFAM1 | | NGFR | | NINJ2 | | NKG7 | | NLGN1 | | NMBR | | NMUR1 | | NNT | | NOD2 | | NOTCH2 | | NOTCH3 | | NOTCH4 | | NOX4 | | NPC1 | | NPFFR2 | | NPHS1 | | NPHS2 | | NPLOC4 | | NPR2 | | NPTN | | NPY1R | | NPY2R | | NPY5R | | NPY6R | | NRAP | | NRBP1 | | NRM | | NRSN1 | | NRSN2 | | NRXN1 | | NRXN3 | | NTNG1 | | NTNG2 | | NTRK1 | | NTRK2 | | NTRK3 | | NTSR1 | | NTSR2 | | NUCB2 | | NUMB | | NUP107 | | NUP133 | | NUP153 | | NUP160 | | NUP214 | | NUP50 | | NUP54 | | NUP62 | | NUP85 | | NUP88 | | NUP98 | | NUTF2 | | NXT1 | | OAS2 | | OCA2 | | OCLN | | OGDH | | OLR1 | | OPA1 | | OPCML | | OPN1LW | | OPN1MW | | OPN1SW | | OPN3 | | OPN4 | | OPRD1 | | OPRK1 | | OPRL1 | | OPRM1 | | SIGMAR1 | | OR10J1 | | OR1D2 | | OR1D4 | | OR1E2 | | OR3A2 | | OR52A1 | | ORAI1 | | ORMDL1 | | OSMR | | SLC51A | | SLC51B | | OTOF | | OXA1L | | OXGR1 | | OXTR | | S100A10 | | P2RX1 | | P2RX3 | | P2RX4 | | P2RX5 | | P2RX7 | | P2RX6 | | P2RY1 | | P2RY11 | | P2RY2 | | P2RY4 | | P2RY6 | | PAG1 | | PAK1 | | PALM | | RASSF9 | | PARD3 | | PARD6A | | PARD6B | | PARP1 | | PCDH1 | | PCDH11X | | PCDH12 | | CDHR2 | | PCDH7 | | PCDH8 | | PCDHA1 | | PCDHA10 | | PCDHA11 | | PCDHA2 | | PCDHA3 | | PCDHA4 | | PCDHA5 | | PCDHA6 | | PCDHA7 | | PCDHA8 | | PCDHAC1 | | PCDHAC2 | | PCDHB11 | | PCDHB12 | | PCDHB15 | | PCDHB17P | | PCDHB2 | | PCDHB3 | | PCDHB4 | | PCDHB6 | | PCSK7 | | PDGFRA | | PDPK1 | | PDPN | | PDYN | | PDZD2 | | NHERF4 | | PECAM1 | | PEX1 | | PEX11A | | PEX12 | | PEX13 | | PEX14 | | PEX16 | | PEX19 | | PEX3 | | PGM5 | | PGRMC1 | | PGRMC2 | | PHB1 | | PHB2 | | PHEX | | PI4K2A | | PICALM | | PICK1 | | PIGA | | PIGB | | PIGC | | PIGF | | PIGK | | PIGO | | PIGR | | PIGS | | PIGT | | PIGU | | PIGV | | PIGY | | PIKFYVE | | PITPNM3 | | PKD1 | | PKD1L1 | | PKD2 | | PKD2L2 | | PKDREJ | | PKHD1 | | PKP2 | | PKP4 | | PLA2G4C | | PLA2R1 | | PLAUR | | PLCE1 | | PLD1 | | PLD2 | | PLEKHB1 | | PLP2 | | PLSCR1 | | PLXNA3 | | PMPCA | | PNN | | PNPLA3 | | PNPLA8 | | PODXL | | PODXL2 | | POLA1 | | POMT1 | | PLPP1 | | PLPP2 | | PPOX | | PPP2R5C | | PPT1 | | NPY4R | | PRAF2 | | PREX1 | | PRICKLE1 | | PRKAR2A | | PRKCB | | PRKCZ | | PRKD1 | | PRLHR | | PRMT8 | | PRNP | | PROCR | | PROM1 | | PRPH2 | | PRRG1 | | PRRG2 | | PRSS21 | | PRSS8 | | PSAP | | PSCA | | CYTH1 | | CYTH2 | | CYTH3 | | PSEN1 | | PSEN2 | | PSENEN | | PSMG1 | | PTAFR | | PTCH1 | | PTCH2 | | PTGER1 | | PTGER2 | | PTGER3 | | PTGER4 | | PTGFR | | PTGIR | | PTH2R | | PTH1R | | PTK7 | | PTPN5 | | PTPN6 | | PTPRA | | PTPRB | | PTPRC | | PTPRCAP | | PTPRD | | PTPRF | | PTPRG | | PTPRH | | PTPRJ | | PTPRK | | PTPRM | | PTPRN | | PTPRN2 | | PTPRO | | PTPRS | | PTPRT | | PTPRU | | PTPRZ1 | | CAVIN1 | | PVR | | NECTIN1 | | NECTIN2 | | NECTIN3 | | PEX2 | | PXMP4 | | QSOX1 | | RAB11FIP5 | | RAB13 | | RAB14 | | RAB22A | | RAB26 | | RAB35 | | RAB5B | | RAC3 | | RAE1 | | RAF1 | | RALBP1 | | RAMP1 | | RAMP2 | | RAMP3 | | RANBP2 | | IPO5 | | RANGAP1 | | RAPGEF6 | | RARRES1 | | RASA3 | | RASGRP4 | | RCE1 | | RDH8 | | RER1 | | RETSAT | | RGMB | | RGR | | RGS1 | | RGS19 | | RHAG | | RHBDL1 | | RHBG | | RHCE | | RHCG | | RHD | | RHO | | RHOB | | RHOT1 | | RHOT2 | | RIC8B | | RIMS1 | | RIN1 | | RIT1 | | RIT2 | | RND1 | | RNF139 | | RNF144B | | RNPEP | | ROBO1 | | ROBO4 | | ROM1 | | ROR1 | | ROR2 | | ROS1 | | RPN1 | | RPN2 | | RRH | | RTN1 | | RTN4 | | RTN4RL1 | | RTN4RL2 | | RXFP3 | | RYK | | RYR1 | | RYR2 | | SBF1 | | SBF2 | | MSMO1 | | SCARB1 | | SCARB2 | | SCARF1 | | SCN2B | | SCN3B | | SCN4B | | SCN8A | | SCNN1G | | SCRN1 | | SCTR | | SCUBE1 | | SDC1 | | SDCBP | | SDHA | | SDHC | | SDHD | | SEC14L1 | | SEC22A | | SEC22C | | SEC23B | | SEC24B | | SECTM1 | | SELE | | SELL | | SELP | | SELPLG | | SELENOS | | SEMA4F | | SENP2 | | SEPTIN5 | | SERINC1 | | SERINC3 | | SERPINA5 | | SGCA | | SGCB | | SGCD | | SGCE | | SGCG | | SGMS1 | | SGMS2 | | SH2B2 | | SHC1 | | SHH | | SHROOM2 | | SHROOM3 | | SIGIRR | | SIGLEC6 | | SIGLEC7 | | SIGLEC8 | | PMEL | | SIRPA | | SIRPB1 | | SIRPG | | SIT1 | | SKAP2 | | SLA2 | | SLC10A1 | | SLC10A2 | | SLC11A1 | | SLC11A2 | | SLC12A1 | | SLC12A2 | | SLC12A3 | | SLC12A4 | | SLC12A6 | | SLC12A7 | | SLC12A9 | | SLC13A2 | | SLC13A4 | | SLC14A1 | | SLC14A2 | | SLC15A1 | | SLC15A2 | | SLC16A1 | | SLC16A10 | | SLC16A2 | | SLC16A3 | | SLC16A4 | | SLC16A5 | | SLC16A6 | | SLC16A7 | | SLC16A8 | | SLC17A1 | | SLC17A2 | | SLC17A3 | | SLC17A4 | | SLC17A5 | | SLC17A7 | | SLC18A2 | | SLC18A3 | | SLC19A1 | | SLC1A1 | | SLC1A4 | | SLC1A5 | | SLC1A6 | | SLC20A1 | | SLC20A2 | | SLC22A1 | | SLC22A11 | | SLC22A12 | | SLC22A13 | | SLC22A14 | | SLC22A16 | | SLC22A18 | | SLC22A2 | | SLC22A3 | | SLC22A4 | | SLC22A5 | | SLC22A6 | | SLC22A7 | | SLC22A8 | | SLC23A1 | | SLC23A2 | | SLC24A1 | | SLC25A1 | | SLC25A11 | | SLC25A13 | | SLC25A14 | | SLC25A15 | | SLC25A17 | | SLC25A22 | | SLC25A3 | | SLC25A4 | | SLC25A5 | | SLC25A6 | | SLC26A1 | | SLC26A2 | | SLC26A4 | | SLC28A1 | | SLC28A2 | | SLC29A1 | | SLC29A2 | | SLC2A2 | | SLC2A4 | | SLC2A5 | | SLC2A8 | | SLC30A3 | | SLC30A5 | | SLC31A1 | | SLC31A2 | | SLC33A1 | | SLC34A1 | | SLC34A2 | | SLC34A3 | | SLC35A1 | | SLC35B2 | | SLC38A3 | | SLC39A1 | | SLC39A2 | | SLC3A1 | | SLC40A1 | | SLC43A1 | | SLC44A1 | | SLC44A2 | | SLC46A1 | | SLC4A1 | | SLC4A11 | | SLC4A3 | | SLC4A4 | | SLC5A1 | | SLC5A2 | | SLC5A3 | | SLC5A5 | | SLC5A6 | | SLC5A7 | | SLC6A2 | | SLC6A20 | | SLC6A3 | | SLC6A4 | | SLC6A7 | | SLC6A9 | | SLC7A1 | | SLC7A10 | | SLC7A11 | | SLC7A2 | | SLC7A4 | | SLC7A6 | | SLC7A7 | | SLC7A8 | | SLC7A9 | | SLC8A1 | | SLC9A1 | | SLC9A2 | | NHERF2 | | SLC9A5 | | SLC9A6 | | SLC9A7 | | SLCO1B1 | | SLCO1B3 | | SLCO2A1 | | SLMAP | | SLN | | SMO | | SMPD2 | | SNAP23 | | SNAP29 | | SRCIN1 | | SNTB1 | | SNTB2 | | SNTG1 | | SNTG2 | | SNUPN | | SOAT1 | | SOD1 | | SORBS1 | | SORBS3 | | SORCS1 | | SORL1 | | SP140 | | SPAG9 | | SPAM1 | | SPAAR | | SPCS1 | | SPINK5 | | SPINT2 | | SPN | | SREBF1 | | SRP9 | | SRPRA | | SRPX | | SSH1 | | SSPN | | SSR1 | | SSR2 | | SSTR1 | | SSTR2 | | SSTR3 | | SSTR4 | | SSTR5 | | ST14 | | ST3GAL5 | | ST3GAL6 | | ST6GALNAC6 | | ST8SIA1 | | STAB1 | | STAB2 | | STBD1 | | STEAP1 | | STEAP2 | | STEAP4 | | STIM1 | | STOM | | STS | | STT3A | | STT3B | | STX10 | | STX12 | | STX16 | | STX1B | | STX2 | | STX3 | | STX4 | | STX5 | | STX6 | | STX8 | | STYK1 | | SUMO1 | | SURF1 | | SVIL | | SYK | | SYNE1 | | SYNGR1 | | SYNGR2 | | SYNGR3 | | SYPL1 | | SYTL1 | | SYTL2 | | SYTL4 | | TAAR5 | | TACR1 | | TACR2 | | TACR3 | | EPCAM | | TACSTD2 | | TAPBP | | TAPT1 | | TAS2R16 | | TBC1D8 | | TBXA2R | | TCIRG1 | | CRIPTO | | TMBIM6 | | TEK | | MFSD10 | | TFRC | | TGFBR1 | | TGFBR2 | | TGFBR3 | | TGFBRAP1 | | TGM1 | | TGM3 | | THBD | | THY1 | | TIE1 | | TIMM10 | | TIMM13 | | TIMM17A | | TIMM17B | | TIMM23 | | TIMM50 | | TIMM8B | | TIMM9 | | TJP1 | | SEC62 | | TLR1 | | TLR10 | | TLR2 | | TLR3 | | TLR4 | | TLR6 | | TM4SF1 | | TM4SF4 | | TM4SF5 | | TM7SF2 | | TM9SF1 | | TM9SF2 | | TMED10 | | TMED2 | | TRAPPC10 | | TMEM11 | | ANO7 | | CEMIP2 | | FAM156A | | TMEM47 | | NDC1 | | RXYLT1 | | TMEM50B | | TMEM59L | | TMPO | | TMPRSS11D | | TMPRSS11E | | TMPRSS2 | | TMPRSS3 | | TMPRSS6 | | TNFRSF10C | | TNFRSF13B | | TNFRSF17 | | TNFRSF1A | | TNFRSF25 | | TNFRSF4 | | TNFRSF9 | | TNFSF10 | | TNFSF12 | | TNFSF15 | | TNFSF4 | | TNFSF8 | | TNK1 | | TOM1 | | TOMM22 | | TOMM34 | | TPBG | | TPO | | TPR | | TPSG1 | | TPTE | | TRAK2 | | TRAM1 | | TRAT1 | | TRDN | | TREH | | TRHDE | | TRHR | | TRIM23 | | TRIM27 | | TRIP6 | | TRO | | TRPA1 | | TRPC1 | | TRPC3 | | TRPC4 | | TRPC5 | | TRPC6 | | TRPM1 | | TRPM2 | | TRPM5 | | TRPV1 | | TRPV2 | | TRPV4 | | TRPV5 | | TRPV6 | | TSHR | | TSPAN1 | | TSPAN12 | | TSPAN13 | | TSPAN15 | | TSPAN16 | | TSPAN2 | | TSPAN3 | | TSPAN31 | | TSPAN4 | | TSPAN7 | | TSPAN9 | | TTYH1 | | TUSC3 | | TMX1 | | ERP44 | | TYRO3 | | TYROBP | | UBIAD1 | | UBQLN4 | | UCP3 | | UMOD | | UNC93A | | UPK1A | | UPK2 | | UQCRB | | UQCRC1 | | UQCRH | | USO1 | | UST | | UTRN | | VAMP1 | | VAMP2 | | VAMP3 | | VAMP4 | | VAMP5 | | VANGL2 | | VAPA | | VAPB | | VAT1 | | VCL | | VDAC1 | | VDAC2 | | VDAC3 | | VIPR1 | | VIPR2 | | VLDLR | | VSIG2 | | VTI1A | | WFS1 | | WNK4 | | WTAP | | XCR1 | | XK | | XPO1 | | XPO7 | | XPR1 | | YKT6 | | ZAP70 | | ZYX | |

**Supplementary table 1.** The primer sequences used in qRT-PCR

| NO. | Gene | Forward primer (5' to 3') | Reverse primer (5' to 3') |
| --- | --- | --- | --- |
| 1 | RAB35 | AACACTTTCTCAGGCAGCTACAT | CCCGATAATACGTGGAGGTGATG |
| 2 | GLE1 | CAAATGGAACCAAGGGCAAAGAT | AAACCGCTTCAGTTGTTCAGATG |
| 3 | OSMR | CCAAGTTCCCTGAGCCAAATTTC | GTGCCTTCTTCCACCAGCTTATC |

**Supplementary Table 2** Differentially expressed genes from bulk-RNA sequence

| Tag | logFC | AveExpr | t | P.Value | adj.P.Val | B |
| --- | --- | --- | --- | --- | --- | --- |
| FAHD2A | -1.426142935 | 4.924376569 | -9.714533829 | 2.18E-09 | 2.09E-05 | 11.36599964 |
| PHACTR3 | 3.756779677 | -0.128104254 | 9.454140802 | 3.54E-09 | 2.09E-05 | 10.93313345 |
| STATH | -11.26443924 | 5.841455875 | -9.324022368 | 4.52E-09 | 2.09E-05 | 10.71312187 |
| GJC3 | -4.949420884 | -0.105521761 | -9.314549391 | 4.60E-09 | 2.09E-05 | 10.69700712 |
| S100A1 | -4.21150867 | 3.694156953 | -8.605099361 | 1.82E-08 | 6.62E-05 | 9.452024598 |
| TTYH1 | -4.777276745 | 1.022063372 | -7.972284337 | 6.56E-08 | 0.00017955 | 8.276831552 |
| MATN4 | -2.645099049 | 0.431532331 | -7.947219075 | 6.91E-08 | 0.00017955 | 8.229011268 |
| ACTG1 | 1.137699316 | 11.20139682 | 7.871691956 | 8.08E-08 | 0.000183787 | 8.084330889 |
| LRRC26 | -4.079000385 | 5.307575445 | -7.681224587 | 1.20E-07 | 0.000219114 | 7.715554813 |
| C6orf58 | -11.0676588 | #NAME? | -7.710856796 | 1.55E-07 | 0.000256278 | 7.490061329 |
| ST3GAL6 | -2.024771261 | 3.467361154 | -7.518475661 | 1.70E-07 | 0.000257757 | 7.396012026 |
| SEMG2 | -5.176742379 | #NAME? | -13.60440536 | 1.04E-07 | 0.000210489 | 7.124030533 |
| GPR137B | 1.273084438 | 4.101770446 | 7.358854575 | 2.39E-07 | 0.000334802 | 7.078658102 |
| PEBP1 | -0.85227648 | 8.406115045 | -7.277392832 | 2.85E-07 | 0.000364184 | 6.915197512 |
| CRISP3 | -9.367886706 | #NAME? | -7.388724601 | 3.00E-07 | 0.000364184 | 6.877671093 |
| CLDN22 | -4.956424773 | #NAME? | -7.466288674 | 3.49E-07 | 0.000396709 | 6.748552429 |
| LBX2 | 3.069885415 | 1.729390906 | 7.032773825 | 4.86E-07 | 0.000487224 | 6.418304612 |
| RASAL1 | -2.959477034 | 1.871525403 | -7.004951292 | 5.17E-07 | 0.000487224 | 6.361219377 |
| NPL | 1.861464538 | 3.914045555 | 6.988585089 | 5.36E-07 | 0.000487224 | 6.327585897 |
| LRP10 | 1.01347032 | 6.003712145 | 6.988312798 | 5.36E-07 | 0.000487224 | 6.327025987 |
| PTAFR | 2.331710419 | 4.38055315 | 6.926875281 | 6.14E-07 | 0.000522203 | 6.200410681 |
| TTC9 | 1.630239461 | 4.505836341 | 6.904306886 | 6.45E-07 | 0.000522203 | 6.153759513 |
| SAMD1 | 1.060334033 | 4.606896629 | 6.884293015 | 6.74E-07 | 0.000522203 | 6.112325904 |
| MET | 1.911492477 | 4.841251505 | 6.87428896 | 6.89E-07 | 0.000522203 | 6.091592936 |
| SLC16A7 | 1.50610619 | 1.476685091 | 6.854898998 | 7.19E-07 | 0.000523322 | 6.05136617 |
| EPPK1 | 2.656056824 | 2.656262303 | 6.836838369 | 7.49E-07 | 0.000523762 | 6.013847606 |
| UNC80 | -4.14189414 | #NAME? | -7.349777895 | 8.43E-07 | 0.000529406 | 5.954563857 |
| KCNN4 | -3.857228135 | 3.952213213 | -6.804017995 | 8.05E-07 | 0.000529406 | 5.945545355 |
| NDUFB5 | 0.875574528 | 5.617303731 | 6.779833211 | 8.50E-07 | 0.000529406 | 5.895113919 |
| BCL2L15 | 2.250325153 | 3.477368343 | 6.74069099 | 9.27E-07 | 0.000529406 | 5.813312164 |
| PFKP | 1.577270273 | 6.760235745 | 6.739207993 | 9.31E-07 | 0.000529406 | 5.810208541 |
| SLC2A4 | -3.692705178 | 1.438369244 | -6.738727791 | 9.32E-07 | 0.000529406 | 5.809203501 |
| C10orf90 | -3.716376609 | #NAME? | -7.900072875 | 1.07E-06 | 0.000591559 | 5.756227206 |
| GABRE | 2.151444127 | 5.428419296 | 6.629205673 | 1.19E-06 | 0.000620257 | 5.579111629 |
| IL4R | 1.499552422 | 6.032694919 | 6.624862675 | 1.20E-06 | 0.000620257 | 5.56995212 |
| OMA1 | 1.367358915 | 5.023266923 | 6.61321282 | 1.23E-06 | 0.000620257 | 5.545368977 |
| PKNOX1 | 0.868004484 | 3.334959396 | 6.603245854 | 1.26E-06 | 0.000620257 | 5.524321692 |
| LRRTM3 | -4.006893586 | #NAME? | -8.037409434 | 1.39E-06 | 0.000666672 | 5.521698198 |
| SLC16A13 | 1.463378565 | 2.532991139 | 6.540149655 | 1.45E-06 | 0.000678346 | 5.390754837 |
| MYBPC1 | -5.877961785 | #NAME? | -6.748727801 | 1.51E-06 | 0.000683071 | 5.386923545 |
| PODXL2 | -1.465350832 | 3.574917325 | -6.51493567 | 1.54E-06 | 0.000683071 | 5.337223172 |
| XRCC4 | 1.165144409 | 3.635901268 | 6.488056455 | 1.64E-06 | 0.000708607 | 5.28005812 |
| NRG3 | -4.945158786 | #NAME? | -7.554215466 | 1.84E-06 | 0.000725157 | 5.268608032 |
| CNIH1 | 0.966512669 | 5.10993149 | 6.462983245 | 1.73E-06 | 0.00072103 | 5.226643272 |
| CLIP2 | 1.403362689 | 2.744970581 | 6.459849514 | 1.74E-06 | 0.00072103 | 5.219961177 |
| TFR2 | 1.905818324 | 0.184154919 | 6.426792468 | 1.88E-06 | 0.000725157 | 5.149390509 |
| NDRG2 | -1.583983843 | 7.142972878 | -6.42509487 | 1.89E-06 | 0.000725157 | 5.145762382 |
| CMIP | 1.679818161 | 4.582413305 | 6.413110866 | 1.94E-06 | 0.000725157 | 5.12013876 |
| AZGP1 | -5.356018409 | 6.329054988 | -6.409925611 | 1.95E-06 | 0.000725157 | 5.11332488 |
| STAMBP | 0.957812538 | 5.09394745 | 6.39687357 | 2.01E-06 | 0.000732063 | 5.085389506 |
| MAL2 | 1.660135971 | 6.761157758 | 6.383852427 | 2.07E-06 | 0.000739294 | 5.057497037 |
| RTN1 | -3.45620705 | 2.077190441 | -6.350904741 | 2.23E-06 | 0.000767735 | 4.986816907 |
| TFE3 | 0.885167913 | 4.7824655 | 6.350403253 | 2.24E-06 | 0.000767735 | 4.985739965 |
| FBP1 | -1.601671571 | 4.941073514 | -6.293700274 | 2.55E-06 | 0.000857707 | 4.863751753 |
| EFHD2 | 1.407155374 | 6.99337085 | 6.28480801 | 2.60E-06 | 0.00085942 | 4.844582176 |
| BIRC2 | 0.932638049 | 5.851215062 | 6.264245632 | 2.72E-06 | 0.000882062 | 4.800214245 |
| PPP1R1B | -5.21049759 | 3.493203706 | -6.257856328 | 2.76E-06 | 0.000882062 | 4.786416438 |
| SPSB1 | 1.377170527 | 4.478105323 | 6.248136563 | 2.83E-06 | 0.000886385 | 4.76541606 |
| MMP10 | 4.716403157 | 7.779511338 | 6.237512978 | 2.90E-06 | 0.000892853 | 4.742448601 |
| SOX8 | -3.418467855 | 0.201739141 | -6.212932578 | 3.06E-06 | 0.000925159 | 4.68925041 |
| C2orf16 | 1.425768394 | -1.195942336 | 6.195048781 | 3.19E-06 | 0.000925159 | 4.650495505 |
| FERMT1 | 2.062112514 | 2.809333578 | 6.190942739 | 3.22E-06 | 0.000925159 | 4.641591646 |
| BDKRB2 | 2.497192067 | 3.439499797 | 6.185458362 | 3.26E-06 | 0.000925159 | 4.629695465 |
| GNA15 | 2.129497148 | 5.067120058 | 6.181958968 | 3.29E-06 | 0.000925159 | 4.622102868 |
| ATP2A3 | -2.276768957 | 5.867871842 | -6.179889151 | 3.31E-06 | 0.000925159 | 4.617611259 |
| CLEC16A | 0.894623274 | 3.510334114 | 6.161958537 | 3.45E-06 | 0.000949537 | 4.578677612 |
| NAGS | 1.540997914 | 1.830823217 | 6.143461344 | 3.60E-06 | 0.000963479 | 4.538470105 |
| ABCA3 | -1.395166606 | 1.641409936 | -6.142676725 | 3.60E-06 | 0.000963479 | 4.536763598 |
| FGF11 | 2.060023508 | 4.11697365 | 6.134372339 | 3.67E-06 | 0.000967872 | 4.518697094 |
| WASF1 | 1.480474549 | 2.556281187 | 6.122523359 | 3.77E-06 | 0.000980484 | 4.492903858 |
| GNG5 | 0.779692753 | 7.280550624 | 6.113750437 | 3.85E-06 | 0.000986449 | 4.473795092 |
| RBM7 | 0.923853755 | 4.657022138 | 6.098418593 | 3.99E-06 | 0.00099146 | 4.440376402 |
| NACC1 | 1.491310022 | 4.135009696 | 6.097082496 | 4.00E-06 | 0.00099146 | 4.437462705 |
| PLS1 | 2.325863336 | 4.930315173 | 6.093639456 | 4.03E-06 | 0.00099146 | 4.42995324 |
| H2AC6 | 3.076544135 | 4.724714971 | 6.077345006 | 4.19E-06 | 0.001015796 | 4.394393723 |
| CISD1 | 1.056331523 | 4.464264582 | 6.07139678 | 4.25E-06 | 0.001016318 | 4.381404489 |
| PTPRH | 5.184747394 | 2.050448618 | 6.064730431 | 4.31E-06 | 0.001018713 | 4.366841773 |
| LRRN1 | 2.715158103 | 3.708429706 | 6.054732014 | 4.41E-06 | 0.00102688 | 4.344989631 |
| GTF2E2 | 0.883117229 | 5.925526215 | 6.050205421 | 4.46E-06 | 0.00102688 | 4.335092361 |
| ATP6V0C | 0.769802584 | 7.657143339 | 6.044061792 | 4.52E-06 | 0.001028577 | 4.321655377 |
| MGLL | -1.304739045 | 5.787253711 | -6.037194948 | 4.60E-06 | 0.001032171 | 4.306631033 |
| ABCC8 | -3.586441758 | #NAME? | -6.203614107 | 4.80E-06 | 0.00103616 | 4.30055101 |
| TNMD | -4.010020112 | #NAME? | -6.887607241 | 5.45E-06 | 0.001117653 | 4.276801624 |
| TTYH3 | 1.537224523 | 4.761053568 | 6.01571468 | 4.83E-06 | 0.00103616 | 4.259595221 |
| TMEM183A | 0.76076805 | 5.740499201 | 6.015273355 | 4.84E-06 | 0.00103616 | 4.25862824 |
| METTL9 | 0.607498962 | 6.226044772 | 6.01135976 | 4.88E-06 | 0.00103616 | 4.250052169 |
| MRPS36 | 0.809479359 | 4.708581984 | 6.009702539 | 4.90E-06 | 0.00103616 | 4.246420041 |
| RAVER1 | 0.93652434 | 4.423963072 | 5.988074472 | 5.15E-06 | 0.001076996 | 4.198986736 |
| C15orf39 | 0.985547616 | 4.040509944 | 5.962354564 | 5.47E-06 | 0.001117653 | 4.142504683 |
| CDH3 | 2.308096824 | 6.146580375 | 5.956903044 | 5.54E-06 | 0.00111934 | 4.13052253 |
| MUC7 | -8.978148726 | #NAME? | -6.030694741 | 5.68E-06 | 0.001135246 | 4.124122828 |
| MINPP1 | 0.853237571 | 4.369108699 | 5.937393003 | 5.80E-06 | 0.001145877 | 4.087610935 |
| TBC1D22A | 0.882474628 | 5.373108045 | 5.926001479 | 5.95E-06 | 0.001163809 | 4.062534435 |
| INSC | -3.206015712 | -2.285482315 | -5.918017044 | 6.06E-06 | 0.001163809 | 4.044948755 |
| AGPAT3 | 0.854732505 | 4.788447876 | 5.914693945 | 6.11E-06 | 0.001163809 | 4.037627391 |
| CSNK1A1 | 0.916672488 | 6.534767093 | 5.907493038 | 6.22E-06 | 0.001163809 | 4.021758009 |
| VWA5A | 1.504325329 | 6.039910435 | 5.907455121 | 6.22E-06 | 0.001163809 | 4.02167443 |
| B3GNT2 | 1.368837297 | 5.800901361 | 5.903620196 | 6.27E-06 | 0.001163809 | 4.013220463 |
| RUNX1 | 0.963460078 | 5.714096248 | 5.888706558 | 6.49E-06 | 0.001192845 | 3.98032718 |
| ADAP1 | 1.256095107 | 3.855227945 | 5.883271336 | 6.58E-06 | 0.001195994 | 3.968332774 |
| LYZ | -5.112239494 | 9.735195275 | -5.873394003 | 6.73E-06 | 0.001209063 | 3.946526604 |
| CBS | -3.142459419 | 2.504128092 | -5.870137683 | 6.78E-06 | 0.001209063 | 3.939335109 |
| EPS8L1 | 1.387564306 | 6.561484135 | 5.865222783 | 6.86E-06 | 0.001211152 | 3.928478317 |
| ENDOU | -2.611443344 | -1.233927097 | -5.853636138 | 7.05E-06 | 0.001232432 | 3.90287272 |
| PI4K2A | 0.851191888 | 4.186471771 | 5.848813163 | 7.13E-06 | 0.001234537 | 3.892209679 |
| ROPN1 | -4.409561516 | #NAME? | -6.629792993 | 8.43E-06 | 0.001344011 | 3.874463203 |
| ITGA3 | 1.31280247 | 5.748568733 | 5.829613599 | 7.46E-06 | 0.001279066 | 3.849734773 |
| CHMP5 | 0.919625902 | 6.754249632 | 5.818874334 | 7.65E-06 | 0.00128863 | 3.825957805 |
| AP2A1 | 0.78565828 | 5.491799162 | 5.818446306 | 7.65E-06 | 0.00128863 | 3.825009866 |
| MUC4 | 2.767673908 | 7.677160754 | 5.809520983 | 7.81E-06 | 0.001303778 | 3.805238437 |
| C6orf47 | 0.678137751 | 4.603389691 | 5.799849221 | 7.99E-06 | 0.001315438 | 3.783803151 |
| H1-2 | 2.514479406 | 6.168700495 | 5.797960947 | 8.03E-06 | 0.001315438 | 3.779616967 |
| CHPT1 | -1.475432549 | 5.566334414 | -5.781410753 | 8.35E-06 | 0.001344011 | 3.742908804 |
| GRIN1 | -2.746412643 | -0.150919818 | -5.780557062 | 8.36E-06 | 0.001344011 | 3.741014479 |
| ZNF544 | 1.036571955 | 4.994888054 | 5.753380781 | 8.91E-06 | 0.001409666 | 3.680667756 |
| STK24 | 1.008692061 | 6.931478594 | 5.743737761 | 9.12E-06 | 0.001429528 | 3.659234823 |
| YBX3 | 0.951673213 | 8.313561427 | 5.73797583 | 9.24E-06 | 0.001431419 | 3.64642318 |
| ACTR3 | 1.42298498 | 5.904636592 | 5.733424798 | 9.34E-06 | 0.001431419 | 3.636301355 |
| CRHBP | -4.983278322 | -0.06714026 | -5.731586903 | 9.38E-06 | 0.001431419 | 3.632213091 |
| IRS1 | 2.673308013 | 2.063303134 | 5.727100345 | 9.48E-06 | 0.001431419 | 3.622231489 |
| P4HA1 | 1.891765142 | 5.467757361 | 5.725219853 | 9.52E-06 | 0.001431419 | 3.618047146 |
| ADRA2B | -2.791347496 | -0.022065847 | -5.720299375 | 9.63E-06 | 0.001436208 | 3.60709658 |
| YIPF4 | 0.894901903 | 4.961784672 | 5.709262938 | 9.89E-06 | 0.001436474 | 3.58252517 |
| SGPL1 | 1.28422264 | 5.209900547 | 5.70722396 | 9.94E-06 | 0.001436474 | 3.577984143 |
| FADD | 0.721230662 | 5.439412213 | 5.707062016 | 9.94E-06 | 0.001436474 | 3.577623455 |
| CDCP1 | 1.688028604 | 4.230639481 | 5.70625753 | 9.96E-06 | 0.001436474 | 3.575831636 |
| SPRING1 | 1.09648341 | 3.992437286 | 5.703147506 | 1.00E-05 | 0.001436474 | 3.568904064 |
| PKM | 1.348609019 | 9.896715835 | 5.695170448 | 1.02E-05 | 0.001452267 | 3.551130337 |
| SLC16A1 | 1.935246994 | 3.472929565 | 5.667499496 | 1.09E-05 | 0.001538069 | 3.48942284 |
| SPINDOC | 1.353817272 | 4.20147046 | 5.654159746 | 1.13E-05 | 0.001575003 | 3.459645046 |
| HPS6 | 0.770720322 | 4.152007885 | 5.643410295 | 1.15E-05 | 0.001596207 | 3.435635609 |
| CA2 | -3.710537619 | 2.716661726 | -5.639361156 | 1.17E-05 | 0.001596207 | 3.426588464 |
| ANXA4 | 1.54347075 | 6.172882936 | 5.637351886 | 1.17E-05 | 0.001596207 | 3.422098428 |
| NFE2L1 | 0.861171006 | 6.783968988 | 5.635646784 | 1.18E-05 | 0.001596207 | 3.418287769 |
| GPAT2 | -2.34439407 | 1.993349429 | -5.631954955 | 1.19E-05 | 0.001598251 | 3.410036003 |
| PHF10 | 0.999578621 | 5.108199542 | 5.61975902 | 1.22E-05 | 0.00163285 | 3.382766107 |
| SLC5A3 | 2.242409962 | 3.55928608 | 5.610218608 | 1.25E-05 | 0.001644537 | 3.36142301 |
| SMIM30 | 0.775560048 | 5.651702927 | 5.60883428 | 1.25E-05 | 0.001644537 | 3.358325303 |
| MACROH2A1 | 0.92177669 | 7.597719402 | 5.607504359 | 1.26E-05 | 0.001644537 | 3.355349155 |
| BAK1 | 1.093401922 | 4.54217325 | 5.600593196 | 1.28E-05 | 0.001652546 | 3.339880111 |
| COX7A2L | 0.588304104 | 7.095217297 | 5.599403961 | 1.28E-05 | 0.001652546 | 3.337217781 |
| PRB3 | -7.001562928 | #NAME? | -5.728951059 | 1.36E-05 | 0.00168275 | 3.320532372 |
| ERLIN1 | 1.051454045 | 5.093900913 | 5.591389253 | 1.31E-05 | 0.00166748 | 3.319271498 |
| AP1S1 | 0.848376727 | 5.53664542 | 5.589641701 | 1.31E-05 | 0.00166748 | 3.315357552 |
| PTPA | 0.687955514 | 6.422842794 | 5.578224223 | 1.35E-05 | 0.00168275 | 3.289778358 |
| TMEM102 | 0.965887685 | 3.910679286 | 5.575443095 | 1.36E-05 | 0.00168275 | 3.283545614 |
| MACIR | 1.598302583 | 3.124313252 | 5.574125331 | 1.36E-05 | 0.00168275 | 3.280592116 |
| TRIM17 | 1.790038018 | 1.872799354 | 5.564220469 | 1.39E-05 | 0.001699718 | 3.25838671 |
| CNDP2 | 1.143026493 | 6.672273714 | 5.562311713 | 1.40E-05 | 0.001699718 | 3.254106377 |
| GALK2 | 1.080649828 | 4.502560193 | 5.561350904 | 1.40E-05 | 0.001699718 | 3.251951649 |
| ID4 | -2.000574201 | 4.01763685 | -5.557249972 | 1.42E-05 | 0.001704936 | 3.242753768 |
| MPO | -4.218602934 | -2.200450462 | -5.549002225 | 1.44E-05 | 0.001715905 | 3.224249929 |
| HDAC2 | 0.777676 | 6.566778884 | 5.548985923 | 1.44E-05 | 0.001715905 | 3.22421335 |
| LPO | -7.828222559 | -0.134353678 | -5.53558161 | 1.49E-05 | 0.001759773 | 3.194126072 |
| DYRK1B | 1.017106166 | 4.050423634 | 5.526392096 | 1.52E-05 | 0.001786922 | 3.173488904 |
| AMN | 2.359986787 | 3.953875104 | 5.517666477 | 1.55E-05 | 0.001812585 | 3.153885726 |
| MBP | 1.192161287 | 4.529738146 | 5.509328134 | 1.59E-05 | 0.001837016 | 3.135145557 |
| BFAR | 0.831587675 | 4.79405217 | 5.50449713 | 1.60E-05 | 0.001840901 | 3.124284882 |
| TMPRSS5 | -2.803945998 | 1.692123035 | -5.503102738 | 1.61E-05 | 0.001840901 | 3.121149696 |
| GRWD1 | 0.895369028 | 3.556169844 | 5.493117806 | 1.65E-05 | 0.001869585 | 3.098693745 |
| TNFRSF1A | 0.852802164 | 6.664192218 | 5.491322078 | 1.66E-05 | 0.001869585 | 3.094654147 |
| SCAMP2 | 0.698378832 | 6.077797005 | 5.486914112 | 1.67E-05 | 0.001875604 | 3.084736829 |
| SLC25A48 | -3.984925905 | #NAME? | -5.545886479 | 1.71E-05 | 0.001875604 | 3.079855297 |
| VPS41 | 0.898379013 | 4.65497639 | 5.482784396 | 1.69E-05 | 0.001875604 | 3.07544382 |
| BEX1 | -2.978374372 | -0.042020562 | -5.474329268 | 1.72E-05 | 0.001875604 | 3.056412277 |
| SLC22A3 | -4.722871233 | -0.266381729 | -5.474284217 | 1.72E-05 | 0.001875604 | 3.056310854 |
| LHPP | 0.843649119 | 4.905644772 | 5.473919021 | 1.72E-05 | 0.001875604 | 3.05548868 |
| CCNY | 0.784123678 | 5.01712004 | 5.468785603 | 1.75E-05 | 0.001875604 | 3.043930363 |
| ST14 | 1.08427143 | 7.280304269 | 5.466833909 | 1.75E-05 | 0.001875604 | 3.039535297 |
| MPI | 0.695843247 | 4.356840655 | 5.466178549 | 1.76E-05 | 0.001875604 | 3.038059394 |
| FBXL19 | 0.999490941 | 3.955631703 | 5.464599535 | 1.76E-05 | 0.001875604 | 3.034503207 |
| CD300LF | 2.224926104 | 1.801746404 | 5.459198343 | 1.79E-05 | 0.001888792 | 3.022337072 |
| H3C6 | 1.653999665 | 1.354831009 | 5.452707341 | 1.81E-05 | 0.001896167 | 3.007712462 |
| HS3ST1 | 1.984557489 | 5.218655485 | 5.452696038 | 1.81E-05 | 0.001896167 | 3.007686993 |
| CHKA | -1.630996426 | 5.222627912 | -5.448884695 | 1.83E-05 | 0.001900864 | 2.99909794 |
| MBOAT7 | 1.032855157 | 5.653132133 | 5.446849143 | 1.84E-05 | 0.001900864 | 2.994510158 |
| PTCH2 | -2.019933416 | 1.38477062 | -5.444061226 | 1.85E-05 | 0.001902699 | 2.988226037 |
| HNRNPF | 1.12093242 | 7.640405131 | 5.433424178 | 1.90E-05 | 0.001940495 | 2.964242793 |
| WDR41 | 0.81628129 | 4.283795645 | 5.43091591 | 1.91E-05 | 0.001941206 | 2.958585877 |
| XPO1 | 1.224173838 | 6.243736034 | 5.424318372 | 1.94E-05 | 0.00196097 | 2.943703584 |
| ILRUN | 0.67288855 | 5.934711766 | 5.410305451 | 2.01E-05 | 0.001991431 | 2.912080713 |
| TMED3 | -1.029618011 | 7.39430243 | -5.407538083 | 2.02E-05 | 0.001991431 | 2.905833461 |
| DYNC1I1 | -2.628095984 | 0.100398568 | -5.405455445 | 2.03E-05 | 0.001991431 | 2.901131502 |
| IGFBP3 | 3.527210135 | 9.259807813 | 5.403868376 | 2.04E-05 | 0.001991431 | 2.897548117 |
| CPLX3 | -4.216123975 | #NAME? | -5.461462197 | 2.08E-05 | 0.001991431 | 2.895237749 |
| CDK6 | 1.181422015 | 3.146809245 | 5.402513495 | 2.04E-05 | 0.001991431 | 2.894488797 |
| PLIN3 | 1.048404215 | 6.211656405 | 5.395157557 | 2.08E-05 | 0.001991431 | 2.87787616 |
| TAGLN2 | 1.092076937 | 9.158032576 | 5.394648849 | 2.08E-05 | 0.001991431 | 2.876727112 |
| SLC39A1 | 0.89580412 | 6.286306459 | 5.394098629 | 2.09E-05 | 0.001991431 | 2.875484271 |
| COMMD8 | 0.970658368 | 4.801575421 | 5.393548844 | 2.09E-05 | 0.001991431 | 2.874242386 |
| STIP1 | 1.048039337 | 6.587338275 | 5.386343914 | 2.12E-05 | 0.001991431 | 2.857964938 |
| HDAC8 | 0.64618093 | 4.732205646 | 5.386165991 | 2.13E-05 | 0.001991431 | 2.857562912 |
| CXCL16 | 1.072681151 | 6.245849686 | 5.38596771 | 2.13E-05 | 0.001991431 | 2.857114885 |
| LONRF3 | -1.863297019 | 0.503765266 | -5.385243554 | 2.13E-05 | 0.001991431 | 2.855478579 |
| HCCS | 0.833288884 | 4.311415173 | 5.384242338 | 2.14E-05 | 0.001991431 | 2.853216149 |
| PGK1 | 1.012475095 | 7.101338927 | 5.376141822 | 2.18E-05 | 0.002019005 | 2.834908217 |
| TBPL1 | 0.644319005 | 4.256326666 | 5.374194081 | 2.19E-05 | 0.002019005 | 2.830505257 |
| GSKIP | 1.097866931 | 4.904908624 | 5.370882465 | 2.20E-05 | 0.002024735 | 2.823018407 |
| TXNDC9 | 0.767958798 | 5.567225316 | 5.367022872 | 2.22E-05 | 0.00203319 | 2.814291459 |
| ICMT | 0.931682616 | 5.810553837 | 5.363983029 | 2.24E-05 | 0.002037711 | 2.807417114 |
| DNASE1 | 0.714096501 | 3.640107857 | 5.360843636 | 2.26E-05 | 0.002037711 | 2.800316779 |
| CDK8 | 1.007486079 | 3.681004244 | 5.358138195 | 2.27E-05 | 0.002037711 | 2.794197206 |
| CRACR2B | -1.679687574 | 6.689092254 | -5.356763269 | 2.28E-05 | 0.002037711 | 2.791086943 |
| PLOD2 | 1.998446522 | 4.805134408 | 5.355689811 | 2.29E-05 | 0.002037711 | 2.788658522 |
| SLC16A3 | 2.262435475 | 6.457912618 | 5.351393327 | 2.31E-05 | 0.002041728 | 2.77893782 |
| RNF19B | 1.326178419 | 5.410990697 | 5.350776163 | 2.31E-05 | 0.002041728 | 2.777541367 |
| PTEN | 0.899885563 | 4.736606026 | 5.34833937 | 2.33E-05 | 0.002043715 | 2.772027316 |
| ATG5 | 0.765244347 | 5.257459112 | 5.343049623 | 2.36E-05 | 0.002044046 | 2.760055713 |
| CTSA | 0.856176544 | 6.834553341 | 5.341669477 | 2.36E-05 | 0.002044046 | 2.756931802 |
| DTNB | -0.851559835 | 5.160266384 | -5.340303457 | 2.37E-05 | 0.002044046 | 2.753839699 |
| MID1 | 1.610376444 | 3.875143299 | 5.340253772 | 2.37E-05 | 0.002044046 | 2.75372723 |
| ATP6V0E2 | -1.299912807 | 4.241174145 | -5.336364922 | 2.39E-05 | 0.002050403 | 2.744923577 |
| SGMS2 | 1.559173381 | 3.731207881 | 5.333831113 | 2.41E-05 | 0.002050403 | 2.739186782 |
| TOR4A | 1.575240615 | 3.433625341 | 5.333040425 | 2.41E-05 | 0.002050403 | 2.73739647 |
| GNMT | -2.712063146 | #NAME? | -5.517085429 | 2.61E-05 | 0.00210012 | 2.722425874 |
| BPIFB3 | -9.038159785 | 2.017635007 | -5.325413236 | 2.46E-05 | 0.002073736 | 2.720123856 |
| GMPR2 | 0.787231468 | 6.295326505 | 5.324101442 | 2.46E-05 | 0.002073736 | 2.717152646 |
| TMPRSS4 | 2.592635751 | 7.052267733 | 5.320645193 | 2.49E-05 | 0.002073736 | 2.709323534 |
| SLC49A4 | 0.86840807 | 3.771958716 | 5.318093761 | 2.50E-05 | 0.002073736 | 2.703543359 |
| ATP6V1G1 | 0.589373342 | 7.307706204 | 5.317660173 | 2.50E-05 | 0.002073736 | 2.702561025 |
| BDKRB1 | 2.266842911 | 1.677948662 | 5.316727458 | 2.51E-05 | 0.002073736 | 2.700447817 |
| DCAF12 | 0.986104143 | 4.743206135 | 5.314508665 | 2.52E-05 | 0.002075326 | 2.695420507 |
| TBL1XR1 | 0.922679056 | 5.113855364 | 5.311056437 | 2.54E-05 | 0.002083092 | 2.687597656 |
| PDXK | 0.605377124 | 5.853750521 | 5.306550954 | 2.57E-05 | 0.002086384 | 2.677386564 |
| ST6GAL1 | 1.864773507 | 6.472606012 | 5.304779713 | 2.58E-05 | 0.002086384 | 2.673371804 |
| TNFRSF21 | 1.813743772 | 5.801415201 | 5.296405918 | 2.63E-05 | 0.002105248 | 2.654387835 |
| MED20 | 0.721508997 | 3.648837648 | 5.295474689 | 2.64E-05 | 0.002105248 | 2.652276309 |
| ZDHHC5 | 0.919599142 | 5.1525582 | 5.288368832 | 2.68E-05 | 0.002131978 | 2.636161636 |
| SLPI | -2.089729964 | 13.3989956 | -5.284914596 | 2.71E-05 | 0.002140319 | 2.628326581 |
| CBSL | -3.530261558 | 0.636996057 | -5.280498972 | 2.74E-05 | 0.002150677 | 2.618309409 |
| SPDYE3 | 1.065794124 | 2.041122857 | 5.277519547 | 2.76E-05 | 0.002150677 | 2.611549442 |
| H3-3A | 0.682843527 | 10.1751798 | 5.277479473 | 2.76E-05 | 0.002150677 | 2.611458514 |
| SZRD1 | 0.796815534 | 5.852350976 | 5.273788552 | 2.78E-05 | 0.002160482 | 2.603083212 |
| LOC112694756 | 1.569812373 | 3.591764681 | 5.271240482 | 2.80E-05 | 0.002163878 | 2.597300566 |
| TPGS2 | 1.207757475 | 6.163673031 | 5.269575766 | 2.81E-05 | 0.002163878 | 2.593522332 |
| VAPA | 0.762776049 | 6.454541387 | 5.266885938 | 2.83E-05 | 0.002168664 | 2.587417025 |
| EIF4A2 | 1.122142559 | 8.841859461 | 5.262651512 | 2.85E-05 | 0.002181279 | 2.577804618 |
| LASP1 | 1.031227466 | 6.521951782 | 5.256400898 | 2.90E-05 | 0.002181279 | 2.563612655 |
| REXO2 | 0.985771486 | 6.860955448 | 5.255869756 | 2.90E-05 | 0.002181279 | 2.562406555 |
| UBAP1 | 0.743712341 | 5.276180807 | 5.25574203 | 2.90E-05 | 0.002181279 | 2.562116515 |
| MSRB1 | 1.079606393 | 5.348652699 | 5.244667801 | 2.98E-05 | 0.002223672 | 2.536964169 |
| MACROH2A2 | 0.980514665 | 4.712524793 | 5.244267404 | 2.98E-05 | 0.002223672 | 2.53605458 |
| H2BC5 | 2.912389196 | 4.417184781 | 5.238699207 | 3.02E-05 | 0.002244333 | 2.523403885 |
| OTUB2 | 1.549327301 | -0.032416118 | 5.230233893 | 3.09E-05 | 0.002276898 | 2.504166303 |
| KCNQ1 | 1.106194676 | 4.749387045 | 5.229293889 | 3.09E-05 | 0.002276898 | 2.502029774 |
| ACTR6 | 0.909758472 | 5.560339191 | 5.212291156 | 3.22E-05 | 0.002329424 | 2.463372289 |
| KLHDC8A | -2.957283853 | 0.938832327 | -5.212218346 | 3.22E-05 | 0.002329424 | 2.4632067 |
| ZG16B | -5.67025208 | 7.384235879 | -5.211080542 | 3.23E-05 | 0.002329424 | 2.460618964 |
| GMPR | -1.355017699 | 4.252178241 | -5.211070646 | 3.23E-05 | 0.002329424 | 2.460596457 |
| KLHL25 | 0.712731385 | 2.326132022 | 5.210039653 | 3.24E-05 | 0.002329424 | 2.458251557 |
| RAB35 | 0.88457635 | 5.061430993 | 5.208876572 | 3.25E-05 | 0.002329424 | 2.455606137 |
| ST6GALNAC1 | 1.409716501 | 6.962819937 | 5.204587538 | 3.28E-05 | 0.002329424 | 2.44584984 |
| ATF6B | 0.7654815 | 6.012705888 | 5.203184522 | 3.29E-05 | 0.002329424 | 2.442658078 |
| DQX1 | 3.524628176 | 2.093663449 | 5.202488907 | 3.30E-05 | 0.002329424 | 2.441075547 |
| SERPINF2 | 1.520519512 | 3.382575739 | 5.201656741 | 3.30E-05 | 0.002329424 | 2.439182311 |
| QRFPR | -1.787210128 | -0.437338362 | -5.201607453 | 3.30E-05 | 0.002329424 | 2.439070177 |
| PCBP1 | 0.678080872 | 8.120676308 | 5.193088383 | 3.37E-05 | 0.002359535 | 2.419685592 |
| GTF3C1 | 0.760624569 | 4.78104576 | 5.192143981 | 3.38E-05 | 0.002359535 | 2.417536322 |
| RDH10 | 2.008066797 | 6.971340204 | 5.191434503 | 3.39E-05 | 0.002359535 | 2.415921648 |
| SLC17A8 | -2.212949738 | #NAME? | -6.045379686 | 4.34E-05 | 0.00270191 | 2.403008708 |
| WFDC5 | 2.57828204 | 0.113505192 | 5.184971242 | 3.44E-05 | 0.002380286 | 2.401210385 |
| GP2 | -2.830256248 | 0.485512228 | -5.184604275 | 3.44E-05 | 0.002380286 | 2.40037502 |
| SLC35B3 | 0.823601504 | 5.473647703 | 5.178649533 | 3.49E-05 | 0.002405403 | 2.386818233 |
| GRIA2 | -5.632539951 | #NAME? | -5.865330258 | 4.29E-05 | 0.002690685 | 2.383290461 |
| SCG5 | 3.688508436 | -0.40168451 | 5.175582477 | 3.52E-05 | 0.002414033 | 2.379834609 |
| COL9A1 | -3.725391032 | #NAME? | -5.223945067 | 3.62E-05 | 0.002445359 | 2.371989392 |
| HEXA | 0.882338091 | 5.576963735 | 5.171258021 | 3.55E-05 | 0.002420973 | 2.369986707 |
| ETV6 | -1.146787548 | 5.686276479 | -5.171254722 | 3.55E-05 | 0.002420973 | 2.369979194 |
| DERA | 0.771072924 | 5.38263416 | 5.165762909 | 3.60E-05 | 0.002443954 | 2.357470894 |
| CFI | 1.506842803 | 6.679332111 | 5.162151033 | 3.63E-05 | 0.002446983 | 2.349243161 |
| DIPK1B | -1.627331889 | 3.24926432 | -5.159903525 | 3.65E-05 | 0.002451148 | 2.344122922 |
| C1orf43 | 0.643926315 | 7.654813103 | 5.155194165 | 3.69E-05 | 0.002461515 | 2.333392916 |
| PHF23 | 0.726424498 | 5.316268784 | 5.155085071 | 3.70E-05 | 0.002461515 | 2.333144331 |
| CCT4 | 0.73591014 | 7.176160648 | 5.15172598 | 3.73E-05 | 0.002463226 | 2.325489808 |
| MMADHC | 0.701231907 | 7.147531083 | 5.149604037 | 3.74E-05 | 0.002463226 | 2.320654007 |
| SLC22A23 | 1.196218132 | 5.240051448 | 5.148944813 | 3.75E-05 | 0.002463226 | 2.3191516 |
| OLA1 | 0.8006526 | 4.915183402 | 5.148740755 | 3.75E-05 | 0.002463226 | 2.318686534 |
| DLX6 | -2.587325998 | -0.669091726 | -5.139810105 | 3.83E-05 | 0.002494546 | 2.298329852 |
| SIAE | 0.936342662 | 4.127159269 | 5.138999477 | 3.84E-05 | 0.002494546 | 2.296481804 |
| PACSIN2 | 0.654939101 | 5.750852682 | 5.133249581 | 3.89E-05 | 0.002520258 | 2.283371984 |
| NECAP2 | 0.763983566 | 6.178171876 | 5.130551651 | 3.92E-05 | 0.00252766 | 2.277219855 |
| TMEM182 | 1.020107714 | 2.149946995 | 5.122962795 | 3.99E-05 | 0.002556269 | 2.259912076 |
| KIAA0930 | 0.790038919 | 5.022195497 | 5.122930502 | 3.99E-05 | 0.002556269 | 2.259838418 |
| DLX5 | -3.345849412 | 2.109166552 | -5.11758174 | 4.04E-05 | 0.002580273 | 2.247637105 |
| GSDMC | 2.308294654 | 4.406386116 | 5.099958362 | 4.22E-05 | 0.002682592 | 2.20742133 |
| FAHD1 | 0.782743206 | 4.962670482 | 5.096323514 | 4.26E-05 | 0.002688003 | 2.199124073 |
| GRB2 | 0.777364384 | 6.097943059 | 5.096224578 | 4.26E-05 | 0.002688003 | 2.19889822 |
| CSNK1G1 | 1.027794499 | 2.842492826 | 5.092934349 | 4.29E-05 | 0.002690685 | 2.191386814 |
| PIP | -7.673313607 | 3.806397952 | -5.087112646 | 4.35E-05 | 0.00270191 | 2.178094376 |
| ERMP1 | 1.430232874 | 4.297811411 | 5.086928172 | 4.35E-05 | 0.00270191 | 2.177673137 |
| GLB1 | 0.840058759 | 5.680532581 | 5.078350945 | 4.44E-05 | 0.002748872 | 2.158084814 |
| PRR4 | -4.704045151 | 3.729979723 | -5.07654291 | 4.46E-05 | 0.002748872 | 2.15395506 |
| ACADL | -2.1138611 | 0.30878026 | -5.075405521 | 4.48E-05 | 0.002748872 | 2.151357026 |
| MAZ | 0.750509762 | 6.655617729 | 5.074137587 | 4.49E-05 | 0.002748872 | 2.148460695 |
| IL10RB | 0.658318899 | 6.106841329 | 5.072450416 | 4.51E-05 | 0.0027508 | 2.144606538 |
| GCNT1 | 1.227140361 | 3.956731316 | 5.067224556 | 4.56E-05 | 0.002762421 | 2.132667424 |
| PLIN5 | -1.816075278 | 4.554515555 | -5.066556164 | 4.57E-05 | 0.002762421 | 2.131140269 |
| RIC8A | 0.634192579 | 5.488099316 | 5.065755961 | 4.58E-05 | 0.002762421 | 2.129311911 |
| ACO2 | 0.858752752 | 6.590254062 | 5.065162962 | 4.59E-05 | 0.002762421 | 2.127956959 |
| CHIC2 | 0.832850918 | 5.040581704 | 5.062547373 | 4.62E-05 | 0.002770703 | 2.121980286 |
| RAB31 | 1.382322363 | 5.225731487 | 5.048300203 | 4.78E-05 | 0.002858017 | 2.089417306 |
| GALNT5 | 1.412287552 | 3.301895034 | 5.043331771 | 4.84E-05 | 0.002882957 | 2.078058468 |
| HIRA | 0.759164874 | 4.241078711 | 5.039494842 | 4.88E-05 | 0.002890935 | 2.06928538 |
| MYO1D | 0.84398519 | 5.176350866 | 5.039472993 | 4.88E-05 | 0.002890935 | 2.06923542 |
| HSPD1 | 1.09254965 | 8.045837562 | 5.037754428 | 4.90E-05 | 0.002893509 | 2.065305636 |
| MTHFD1L | 1.270841975 | 4.280553569 | 5.031737047 | 4.97E-05 | 0.002926102 | 2.051544404 |
| TCAIM | 0.920506502 | 4.333993807 | 5.028248571 | 5.01E-05 | 0.002926102 | 2.043565506 |
| SHISA5 | 1.106487682 | 7.724395351 | 5.028235873 | 5.01E-05 | 0.002926102 | 2.043536462 |
| CAPN5 | 1.290010822 | 4.623995875 | 5.027754741 | 5.02E-05 | 0.002926102 | 2.042435948 |
| LACTB2 | 1.008913578 | 4.345918725 | 5.022488841 | 5.08E-05 | 0.002954021 | 2.030390079 |
| CST6 | 3.238880265 | 1.979362308 | 5.018661239 | 5.13E-05 | 0.002971917 | 2.021633256 |
| HSPA4 | 0.907942551 | 5.529997003 | 5.016286222 | 5.16E-05 | 0.002979498 | 2.016199211 |
| C10orf82 | -2.448915282 | #NAME? | -5.175997692 | 5.51E-05 | 0.003023163 | 2.0150227 |
| BOK | 1.542446951 | 3.855603652 | 5.013313605 | 5.20E-05 | 0.002991438 | 2.009397359 |
| CTNNA1 | 0.854334208 | 8.318496888 | 5.009962426 | 5.24E-05 | 0.003006202 | 2.00172864 |
| CELF5 | -2.034400525 | #NAME? | -5.109195528 | 5.47E-05 | 0.003023163 | 1.999719794 |
| MANSC1 | -1.828095414 | 3.314006149 | -5.006692982 | 5.28E-05 | 0.003017091 | 1.994246294 |
| ISLR2 | -1.84178606 | -0.913228844 | -5.005856085 | 5.29E-05 | 0.003017091 | 1.992330892 |
| UST | 1.270890994 | 3.233758281 | 5.003977839 | 5.32E-05 | 0.003021321 | 1.988032003 |
| ADORA2B | 1.791339005 | 5.016665163 | 5.001112714 | 5.35E-05 | 0.003023163 | 1.981473954 |
| ZNF488 | 2.377401155 | 0.054040364 | 4.999042903 | 5.38E-05 | 0.003023163 | 1.976736005 |
| LRFN3 | 0.733285808 | 2.150931636 | 4.998541996 | 5.39E-05 | 0.003023163 | 1.975589354 |
| SEPTIN9 | 0.811725663 | 7.542030515 | 4.996890862 | 5.41E-05 | 0.003023163 | 1.971809551 |
| RAD23B | 0.823941832 | 6.099979805 | 4.995196261 | 5.43E-05 | 0.003023163 | 1.967930071 |
| AIF1L | -1.684905961 | 2.946501599 | -4.993229042 | 5.46E-05 | 0.003023163 | 1.963426266 |
| F5 | -4.122884049 | 0.689079468 | -4.992691896 | 5.46E-05 | 0.003023163 | 1.962196469 |
| KANK4 | -3.123274676 | 1.161799292 | -4.990514705 | 5.49E-05 | 0.003023163 | 1.957211605 |
| CNN2 | 1.060573789 | 7.62953497 | 4.990313213 | 5.49E-05 | 0.003023163 | 1.956750259 |
| TCN1 | -4.045269053 | 5.927355197 | -4.986437111 | 5.55E-05 | 0.003023163 | 1.947874845 |
| SERPINB4 | 2.989192983 | 7.62744417 | 4.986210021 | 5.55E-05 | 0.003023163 | 1.947354833 |
| PPP6R1 | 0.947747474 | 5.428931227 | 4.985979359 | 5.55E-05 | 0.003023163 | 1.946826637 |
| ABHD15 | 0.77677781 | 3.976707905 | 4.981583796 | 5.61E-05 | 0.003046287 | 1.936760573 |
| GM2A | 1.295985191 | 5.523220749 | 4.97799693 | 5.66E-05 | 0.003051835 | 1.928545621 |
| PLEKHB2 | 0.956029313 | 5.937691448 | 4.977301308 | 5.67E-05 | 0.003051835 | 1.926952359 |
| HCK | 2.049618555 | 4.09676014 | 4.977136587 | 5.67E-05 | 0.003051835 | 1.926575075 |
| R3HDM4 | 0.697556433 | 6.332034742 | 4.9740108 | 5.72E-05 | 0.003065881 | 1.919415351 |
| FAHD2B | -0.893693258 | 4.374478384 | -4.970601794 | 5.76E-05 | 0.003079156 | 1.911606254 |
| AMMECR1 | 1.455057721 | 2.560279573 | 4.966969349 | 5.81E-05 | 0.003079156 | 1.903284576 |
| PFKFB4 | 1.449956595 | 2.196734354 | 4.966516112 | 5.82E-05 | 0.003079156 | 1.902246189 |
| USP22 | 0.758054005 | 6.556737 | 4.966138178 | 5.82E-05 | 0.003079156 | 1.901380315 |
| POC1B | 1.114502874 | 4.528029558 | 4.965729586 | 5.83E-05 | 0.003079156 | 1.900444193 |
| RALBP1 | 0.760434762 | 5.175236055 | 4.964955317 | 5.84E-05 | 0.003079156 | 1.898670241 |
| RAB5C | 0.679609755 | 6.581217061 | 4.954100987 | 6.00E-05 | 0.003151806 | 1.873797955 |
| KIRREL3 | -2.366969643 | 0.083102221 | -4.951001788 | 6.04E-05 | 0.003166338 | 1.86669503 |
| MCU | 1.286844072 | 4.625428373 | 4.948343832 | 6.08E-05 | 0.003177577 | 1.860602938 |
| EDC3 | 0.646209441 | 4.184599686 | 4.943042991 | 6.16E-05 | 0.003204101 | 1.84845212 |
| HNRNPC | 0.942330427 | 8.207741152 | 4.941738261 | 6.18E-05 | 0.003204101 | 1.845461121 |
| HOMER1 | 1.377129018 | 1.244516207 | 4.941350292 | 6.18E-05 | 0.003204101 | 1.844571714 |
| TBX6 | 1.473009657 | 2.777945896 | 4.936173393 | 6.26E-05 | 0.0032051 | 1.832703009 |
| MACC1 | 1.893840836 | 2.815565827 | 4.936151777 | 6.26E-05 | 0.0032051 | 1.832653448 |
| SBNO2 | 1.339494849 | 5.954362738 | 4.935611677 | 6.27E-05 | 0.0032051 | 1.831415113 |
| EIF4E2 | 0.875879307 | 6.541700575 | 4.934292238 | 6.29E-05 | 0.0032051 | 1.828389854 |
| HMGB3 | 1.982252347 | 5.605447514 | 4.932718682 | 6.31E-05 | 0.0032051 | 1.824781819 |
| SMARCA4 | 0.758930333 | 5.440596138 | 4.931825647 | 6.33E-05 | 0.0032051 | 1.822734104 |
| COA4 | 0.713267311 | 6.440707904 | 4.930145309 | 6.35E-05 | 0.0032051 | 1.818880999 |
| C4orf3 | 0.605434968 | 7.10299202 | 4.929245371 | 6.37E-05 | 0.0032051 | 1.816817329 |
| SUPT7L | 0.735640122 | 4.751364693 | 4.928707351 | 6.38E-05 | 0.0032051 | 1.81558356 |
| FBRS | 0.761861325 | 4.806928887 | 4.928452084 | 6.38E-05 | 0.0032051 | 1.814998184 |
| P2RY6 | 2.40275976 | 2.628175333 | 4.926362225 | 6.41E-05 | 0.003212456 | 1.81020562 |
| EFCAB3 | 2.35778331 | 0.977843113 | 4.923036646 | 6.46E-05 | 0.003229487 | 1.802578753 |
| TPI1 | 0.984992873 | 9.18833466 | 4.916443074 | 6.57E-05 | 0.003267748 | 1.787455334 |
| PPP4R2 | 0.928786468 | 5.132375765 | 4.915637195 | 6.58E-05 | 0.003267748 | 1.785606761 |
| IL1RAP | 1.671944056 | 3.755738585 | 4.914769475 | 6.59E-05 | 0.003267748 | 1.783616297 |
| MEAK7 | 1.079973385 | 3.611465507 | 4.912845459 | 6.63E-05 | 0.003274064 | 1.779202649 |
| KCNMA1 | -2.754962529 | 3.04772885 | -4.90486425 | 6.75E-05 | 0.003328818 | 1.760891869 |
| TKFC | 0.74060898 | 4.884761567 | 4.903041356 | 6.78E-05 | 0.003328901 | 1.756709253 |
| GID8 | 0.702488783 | 5.400086652 | 4.902618817 | 6.79E-05 | 0.003328901 | 1.755739716 |
| TSPYL2 | -1.227550805 | 5.678299656 | -4.899480485 | 6.84E-05 | 0.003345247 | 1.748538366 |
| LMO7 | 1.658178619 | 5.73538402 | 4.89555207 | 6.91E-05 | 0.003368129 | 1.739523342 |
| UBE2V2 | 0.804910077 | 5.592213986 | 4.893527169 | 6.94E-05 | 0.003375617 | 1.734876243 |
| GALNT13 | -4.497540675 | #NAME? | -4.983024349 | 7.30E-05 | 0.003464886 | 1.726109756 |
| CISD2 | 0.699991437 | 3.634390515 | 4.889529724 | 7.01E-05 | 0.003392795 | 1.725701587 |
| FKBP4 | 0.790536022 | 5.81889169 | 4.889224046 | 7.01E-05 | 0.003392795 | 1.724999984 |
| CAPN13 | 3.536578233 | 8.130964481 | 4.884799566 | 7.09E-05 | 0.003411163 | 1.714844219 |
| PEX13 | 0.93189449 | 4.185863395 | 4.881939468 | 7.14E-05 | 0.003425787 | 1.708278747 |
| DDA1 | 0.681507769 | 4.279866771 | 4.87766501 | 7.21E-05 | 0.003452294 | 1.698465798 |
| TMEM165 | 1.153898166 | 6.827754893 | 4.873893858 | 7.28E-05 | 0.003464886 | 1.689807547 |
| VCP | 0.789252781 | 7.672806423 | 4.873780803 | 7.28E-05 | 0.003464886 | 1.689547971 |
| AGRN | 1.088779061 | 6.118581906 | 4.871150452 | 7.33E-05 | 0.003470618 | 1.683508477 |
| IRX6 | 2.881251785 | 2.92170886 | 4.870073819 | 7.35E-05 | 0.003470634 | 1.681036345 |
| JPT2 | 1.46566651 | 6.66393628 | 4.864884995 | 7.44E-05 | 0.003505391 | 1.669121136 |
| PLBD1 | 1.252528249 | 4.509609653 | 4.861553019 | 7.50E-05 | 0.003524646 | 1.661469163 |
| ELFN2 | 5.765423135 | #NAME? | 5.062637492 | 7.07E-05 | 0.003411163 | 1.655990481 |
| PEDS1-UBE2V1 | 1.701982145 | 3.806645262 | 4.856122613 | 7.60E-05 | 0.00354565 | 1.648996953 |
| CENPM | 2.127363465 | 4.152674553 | 4.855669692 | 7.61E-05 | 0.00354565 | 1.64795665 |
| ABHD16A | 0.602628793 | 5.660585549 | 4.85539608 | 7.61E-05 | 0.00354565 | 1.647328192 |
| UBTD2 | 0.729766735 | 4.672399151 | 4.854820987 | 7.62E-05 | 0.00354565 | 1.646007254 |
| YWHAH | 1.033510258 | 6.929172464 | 4.853390339 | 7.65E-05 | 0.00354565 | 1.642721112 |
| CCDC97 | 0.763093457 | 4.750300246 | 4.851424438 | 7.69E-05 | 0.00354565 | 1.638205359 |
| GPD1 | -1.683371096 | 1.326697996 | -4.849881133 | 7.72E-05 | 0.00354565 | 1.634660199 |
| RAPGEF3 | -1.489341311 | 4.337229763 | -4.84909083 | 7.73E-05 | 0.00354565 | 1.632844732 |
| MED18 | 0.612091224 | 4.634094676 | 4.847863085 | 7.75E-05 | 0.00354565 | 1.630024328 |
| BTBD1 | 0.911413079 | 5.508771604 | 4.847580398 | 7.76E-05 | 0.00354565 | 1.629374923 |
| CCDC71 | 0.692330459 | 4.462981666 | 4.846926822 | 7.77E-05 | 0.00354565 | 1.627873476 |
| DLG4 | 1.482197722 | 3.732866823 | 4.84637192 | 7.78E-05 | 0.00354565 | 1.626598693 |
| HSPH1 | 1.83764251 | 6.837453474 | 4.844836159 | 7.81E-05 | 0.00354565 | 1.623070503 |
| CTU1 | 0.71352741 | 3.182487356 | 4.84442096 | 7.82E-05 | 0.00354565 | 1.622116623 |
| COPS5 | 0.698913298 | 6.124380795 | 4.842507033 | 7.85E-05 | 0.00355326 | 1.617719462 |
| SUMO2 | 0.617594903 | 7.06547626 | 4.840069678 | 7.90E-05 | 0.003558411 | 1.612119502 |
| CNOT11 | 0.76066156 | 5.543181571 | 4.839859551 | 7.90E-05 | 0.003558411 | 1.611636712 |
| GJB2 | 1.999000208 | 6.009726923 | 4.83206262 | 8.06E-05 | 0.003617293 | 1.593720939 |
| PHLDA1 | -2.45272417 | 4.0246689 | -4.828751201 | 8.12E-05 | 0.003637443 | 1.586111136 |
| RAI14 | 1.063092636 | 5.522668014 | 4.826831123 | 8.16E-05 | 0.003645422 | 1.581698482 |
| TM9SF4 | 0.903081863 | 5.352253428 | 4.825430707 | 8.19E-05 | 0.003648844 | 1.578479991 |
| SIPA1L3 | 1.310360338 | 2.659746802 | 4.824342922 | 8.21E-05 | 0.003649527 | 1.575979942 |
| TVP23B | 0.873467806 | 6.033662515 | 4.822323642 | 8.25E-05 | 0.003658479 | 1.571338905 |
| NAV2 | 1.704448543 | 2.832351409 | 4.820791287 | 8.28E-05 | 0.003663152 | 1.567816878 |
| NAV1 | 1.31123676 | 3.030425558 | 4.819747079 | 8.30E-05 | 0.003663517 | 1.565416768 |
| C3orf38 | 1.008202982 | 4.039387842 | 4.817648877 | 8.34E-05 | 0.003665519 | 1.560593915 |
| LENG9 | 1.649511052 | 3.860250196 | 4.817522866 | 8.34E-05 | 0.003665519 | 1.560304265 |
| MAPT | -2.036371894 | -1.571607066 | -4.816364271 | 8.37E-05 | 0.003666966 | 1.55764107 |
| BAG3 | 1.285783498 | 6.098052323 | 4.815306761 | 8.39E-05 | 0.003667536 | 1.555210183 |
| IL10 | 2.070853147 | 1.28423798 | 4.813013878 | 8.44E-05 | 0.003679125 | 1.549939391 |
| ARL5A | 0.919845686 | 4.113635984 | 4.810202958 | 8.49E-05 | 0.003695408 | 1.543477446 |
| SLC2A1 | 2.360186601 | 6.465839764 | 4.808559117 | 8.53E-05 | 0.00370025 | 1.539698311 |
| ZNRF2 | 0.9909353 | 3.737915562 | 4.8073962 | 8.55E-05 | 0.00370025 | 1.537024732 |
| ORAI3 | 1.151168417 | 5.03941964 | 4.806711594 | 8.57E-05 | 0.00370025 | 1.53545078 |
| OSMR | 1.664101066 | 4.699580361 | 4.802647147 | 8.65E-05 | 0.003703952 | 1.52610594 |
| CASP6 | 0.703336304 | 4.779243838 | 4.80257597 | 8.65E-05 | 0.003703952 | 1.525942287 |
| VTA1 | 0.843295843 | 3.704190761 | 4.802422754 | 8.66E-05 | 0.003703952 | 1.525590005 |
| RCC1 | 1.295492445 | 4.921277577 | 4.802032505 | 8.66E-05 | 0.003703952 | 1.524692716 |
| C2CD3 | 1.246729151 | 2.951474749 | 4.801427434 | 8.68E-05 | 0.003703952 | 1.523301484 |
| CAPRIN1 | 1.001757654 | 5.948940046 | 4.79935368 | 8.72E-05 | 0.003711578 | 1.518533206 |
| IP6K2 | 0.785006287 | 6.942052991 | 4.798646296 | 8.74E-05 | 0.003711578 | 1.516906643 |
| SH3BP1 | 1.538899988 | 4.595148612 | 4.793947287 | 8.84E-05 | 0.003745344 | 1.506101199 |
| GPR137 | 0.733344724 | 4.919954253 | 4.789191862 | 8.94E-05 | 0.003773182 | 1.495165103 |
| PADI1 | 4.82075023 | 2.786687771 | 4.788032643 | 8.96E-05 | 0.003773182 | 1.492499095 |
| EXOC4 | 0.708867181 | 5.3017557 | 4.7880178 | 8.96E-05 | 0.003773182 | 1.49246496 |
| KRT81 | -2.880420439 | 0.285115207 | -4.785606056 | 9.02E-05 | 0.003786543 | 1.486918184 |
| DSE | 1.989481145 | 4.302797752 | 4.782617099 | 9.08E-05 | 0.003788829 | 1.480043549 |
| ERGIC2 | 0.910292529 | 4.315637855 | 4.782509347 | 9.08E-05 | 0.003788829 | 1.479795711 |
| LIG4 | 1.387011213 | 3.357795775 | 4.776062156 | 9.23E-05 | 0.003838843 | 1.464965862 |
| RCN2 | 0.72317536 | 4.926241914 | 4.774613799 | 9.26E-05 | 0.003838843 | 1.461634122 |
| WRNIP1 | 0.665992404 | 5.21003344 | 4.774272856 | 9.27E-05 | 0.003838843 | 1.46084982 |
| NCK1 | 1.299946022 | 5.282867323 | 4.769890047 | 9.37E-05 | 0.003860934 | 1.450767232 |
| PSMD10 | 0.893493993 | 6.119902456 | 4.767877754 | 9.41E-05 | 0.003860934 | 1.446137732 |
| CCT8 | 0.767869414 | 7.295698359 | 4.767236767 | 9.43E-05 | 0.003860934 | 1.444663041 |
| SH3BGRL2 | -1.072739461 | 4.375868461 | -4.765543969 | 9.47E-05 | 0.003861696 | 1.440768413 |
| TM4SF4 | -2.141617539 | #NAME? | -5.574298422 | 9.40E-05 | 0.003860934 | 1.438211146 |
| ARMT1 | 1.043198738 | 4.582762101 | 4.764387659 | 9.49E-05 | 0.003861696 | 1.438108022 |
| DPYD | 1.32650527 | 4.559072198 | 4.763564807 | 9.51E-05 | 0.003861696 | 1.436214807 |
| SLC4A2 | 0.642147677 | 5.128650941 | 4.763328245 | 9.52E-05 | 0.003861696 | 1.435670521 |
| FAM222A | 1.063205106 | 2.585732975 | 4.762538171 | 9.53E-05 | 0.003861696 | 1.43385269 |
| RERGL | -4.019942003 | #NAME? | -4.802109279 | 9.75E-05 | 0.003871543 | 1.431074125 |
| S100B | -2.930368128 | 2.43113577 | -4.760820754 | 9.57E-05 | 0.003864709 | 1.429901115 |
| PLEKHA6 | 1.064034057 | 2.993536474 | 4.759162648 | 9.61E-05 | 0.003864709 | 1.4260859 |
| MAP2K6 | 1.388265816 | 2.272433181 | 4.758727407 | 9.62E-05 | 0.003864709 | 1.425084417 |
| FBXO43 | 2.032236218 | -0.175239668 | 4.758017477 | 9.64E-05 | 0.003864709 | 1.423450863 |
| TEFM | 0.726325446 | 3.979204286 | 4.757651035 | 9.65E-05 | 0.003864709 | 1.422607672 |
| ZNF283 | -1.17826914 | 2.010832372 | -4.75505439 | 9.71E-05 | 0.003870785 | 1.416632576 |
| MPZL2 | 1.367960393 | 7.239505333 | 4.754642212 | 9.72E-05 | 0.003870785 | 1.415684097 |
| KCNK1 | 1.446909456 | 4.835138434 | 4.75428833 | 9.73E-05 | 0.003870785 | 1.414869761 |
| TRIOBP | 0.85106835 | 5.368201429 | 4.751153385 | 9.80E-05 | 0.003883339 | 1.407655574 |
| EIF4A1 | 0.823925434 | 9.081709765 | 4.748483178 | 9.86E-05 | 0.00390008 | 1.401510563 |
| SMIM15 | 0.797233103 | 5.450912071 | 4.743135678 | 9.99E-05 | 0.00392959 | 1.389203464 |
| PTH2R | -3.592477066 | -1.188264802 | -4.742696931 | 0.000100044 | 0.00392959 | 1.388193655 |
| TMEM250 | 0.707375542 | 4.846076443 | 4.740287407 | 0.000100631 | 0.003940553 | 1.382647838 |
| ZBTB7A | 0.89158563 | 4.25772336 | 4.73918846 | 0.000100899 | 0.003940553 | 1.380118409 |
| GALNT2 | 0.935360132 | 5.743906415 | 4.73888695 | 0.000100973 | 0.003940553 | 1.379424421 |
| UBE2Z | 0.696095626 | 5.92659631 | 4.731450654 | 0.000102812 | 0.004003716 | 1.362307214 |
| C1D | 0.676472926 | 4.915447276 | 4.726439741 | 0.00010407 | 0.004044043 | 1.350771788 |
| MMP14 | 1.120188303 | 7.059395463 | 4.721567488 | 0.000105308 | 0.004079006 | 1.339554747 |
| DNTTIP1 | 0.663390546 | 5.546062061 | 4.721135938 | 0.000105418 | 0.004079006 | 1.338561182 |
| ME2 | 1.020244676 | 3.355096021 | 4.719040385 | 0.000105956 | 0.004090849 | 1.333736464 |
| PGAP4 | 0.94223662 | 3.524281351 | 4.718192163 | 0.000106174 | 0.004090849 | 1.33178351 |
| VSTM2L | 2.674911151 | 4.25051821 | 4.717274796 | 0.000106411 | 0.004091092 | 1.329671329 |
| DUSP22 | 0.910152633 | 6.025081336 | 4.71642575 | 0.00010663 | 0.004091092 | 1.327716428 |
| COX6B2 | 2.032822291 | 3.61182126 | 4.715254777 | 0.000106934 | 0.0040941 | 1.325020262 |
| EPHA4 | 1.391549936 | 3.493951289 | 4.713759159 | 0.000107323 | 0.004100359 | 1.321576534 |
| PRPS2 | 1.017736934 | 5.69096109 | 4.71201887 | 0.000107777 | 0.004109086 | 1.317569352 |
| HDGF | 0.776350046 | 7.552787874 | 4.709367604 | 0.000108473 | 0.004126967 | 1.311464364 |
| PXDN | 2.385811922 | 3.927485412 | 4.706043648 | 0.000109352 | 0.00415172 | 1.303810078 |
| SNTA1 | -0.916357717 | 4.073456468 | -4.703854954 | 0.000109935 | 0.004156492 | 1.298769841 |
| CASP3 | 0.926248418 | 5.928586569 | 4.703854242 | 0.000109935 | 0.004156492 | 1.298768201 |
| TPPP2 | -2.758960401 | #NAME? | -5.104178281 | 0.00013355 | 0.00458253 | 1.280541377 |
| EEF1AKNMT | 0.637732356 | 4.612255364 | 4.695503635 | 0.000112187 | 0.004216723 | 1.279536613 |
| PDE6B | 1.662890815 | 3.272448264 | 4.69536843 | 0.000112223 | 0.004216723 | 1.279225215 |
| BCL10 | 1.063704036 | 4.728952813 | 4.690751318 | 0.000113489 | 0.004229043 | 1.268590988 |
| TMBIM6 | 0.675124237 | 9.206156128 | 4.690542077 | 0.000113546 | 0.004229043 | 1.268109045 |
| TENM4 | 1.963988604 | 2.072283856 | 4.689967509 | 0.000113705 | 0.004229043 | 1.266785641 |
| EGF | -3.294488967 | -0.592160114 | -4.689797757 | 0.000113752 | 0.004229043 | 1.266394646 |
| MTX2 | 0.616237281 | 5.69522265 | 4.689093546 | 0.000113946 | 0.004229043 | 1.264772616 |
| CGNL1 | -1.435840581 | 2.675785121 | -4.687951507 | 0.000114263 | 0.004232151 | 1.262142093 |
| NDFIP2 | 1.436583582 | 4.976727994 | 4.686409415 | 0.000114692 | 0.004239396 | 1.258590043 |
| CMTM6 | 1.175825513 | 6.248780554 | 4.683428062 | 0.000115525 | 0.004261542 | 1.251722604 |
| SSX7 | 3.846000591 | #NAME? | 6.163697857 | 0.000113367 | 0.004229043 | 1.250674437 |
| RBP7 | -1.859366466 | 4.184739715 | -4.680322172 | 0.0001164 | 0.004285119 | 1.244568022 |
| EGLN3 | 2.664643146 | 6.634208164 | 4.678196451 | 0.000117002 | 0.004298599 | 1.239671148 |
| ADORA3 | 2.8893563 | 1.123433164 | 4.671631471 | 0.000118883 | 0.004348024 | 1.224547057 |
| CNGA1 | -2.445121995 | 0.036234768 | -4.671002397 | 0.000119065 | 0.004348024 | 1.22309776 |
| PKDCC | -3.60149169 | 3.232138063 | -4.669611392 | 0.000119468 | 0.004353998 | 1.219893048 |
| TMEM184B | 0.960674964 | 5.375001036 | 4.667803859 | 0.000119994 | 0.004364412 | 1.215728624 |
| ODAM | -5.958607206 | 3.108119516 | -4.664327395 | 0.000121011 | 0.004376818 | 1.20771885 |
| LNX1 | 1.273243295 | 3.59599917 | 4.664214024 | 0.000121045 | 0.004376818 | 1.207457639 |
| AIFM2 | 0.780463566 | 3.592672145 | 4.66417301 | 0.000121057 | 0.004376818 | 1.207363141 |
| PHF21A | 0.802385178 | 4.35394662 | 4.662973899 | 0.00012141 | 0.004380878 | 1.204600307 |
| PGM2 | 1.455396459 | 4.247433876 | 4.658435687 | 0.000122756 | 0.004412776 | 1.194143608 |
| GNAI3 | 0.895519571 | 4.171655971 | 4.658252417 | 0.000122811 | 0.004412776 | 1.193721315 |
| KCNH8 | -3.658060656 | -1.933761893 | -4.657313935 | 0.000123091 | 0.004412776 | 1.191558844 |
| CARM1 | 0.809211282 | 4.613367523 | 4.656219929 | 0.000123419 | 0.004412776 | 1.189037982 |
| MVP | 1.008707321 | 7.779441467 | 4.6559248 | 0.000123507 | 0.004412776 | 1.188357925 |
| ALCAM | 1.29109367 | 7.006668583 | 4.654621688 | 0.000123899 | 0.00441809 | 1.185355179 |
| ALKAL2 | -2.889300843 | -1.376303109 | -4.653099325 | 0.000124358 | 0.004424086 | 1.181847157 |
| SHMT2 | 1.181822935 | 6.222027597 | 4.651649726 | 0.000124797 | 0.004424086 | 1.178506754 |
| FXR1 | 0.699758674 | 6.361495454 | 4.649419298 | 0.000125475 | 0.004426662 | 1.17336693 |
| ARNTL2 | 1.71858919 | 2.932735926 | 4.649251354 | 0.000125526 | 0.004426662 | 1.172979912 |
| ACR | -2.290841258 | -0.886233174 | -4.648455687 | 0.000125769 | 0.004426662 | 1.171146333 |
| CAPZA2 | 0.700345444 | 5.347418249 | 4.647211496 | 0.00012615 | 0.004426662 | 1.168279121 |
| SF3B4 | 0.86316817 | 5.449992401 | 4.647072299 | 0.000126193 | 0.004426662 | 1.167958341 |
| TMEM63B | 0.84753206 | 4.894926293 | 4.646624889 | 0.00012633 | 0.004426662 | 1.166927281 |
| RABIF | 0.785256499 | 3.47836827 | 4.64455309 | 0.000126968 | 0.004440449 | 1.162152743 |
| TFCP2 | 0.643459416 | 4.957996566 | 4.63763536 | 0.00012912 | 0.004507064 | 1.146209807 |
| POF1B | 1.560453212 | 3.391224585 | 4.634716689 | 0.000130039 | 0.004530453 | 1.139482948 |
| RANGAP1 | 0.931658077 | 5.947804947 | 4.631667917 | 0.000131007 | 0.004555421 | 1.132456017 |
| PSEN1 | 0.651086273 | 5.381175619 | 4.630685927 | 0.00013132 | 0.004557593 | 1.130192642 |
| AP5S1 | 0.596292616 | 2.540663234 | 4.62914605 | 0.000131812 | 0.004565774 | 1.126643355 |
| ARPC1B | 1.164071179 | 7.838394062 | 4.628380786 | 0.000132057 | 0.004565774 | 1.124879463 |
| CDC42 | 1.291438774 | 6.514090545 | 4.626280943 | 0.000132733 | 0.004580429 | 1.120039376 |
| MR1 | 1.048577744 | 3.933813873 | 4.625128277 | 0.000133106 | 0.00458253 | 1.117382465 |
| MTMR2 | 0.851864704 | 3.980196294 | 4.624390929 | 0.000133344 | 0.00458253 | 1.115682851 |
| CRB3 | 1.007534232 | 4.820951555 | 4.622251959 | 0.00013404 | 0.004590665 | 1.110752381 |
| SRGAP2B | 1.129601261 | 3.027576502 | 4.620444741 | 0.00013463 | 0.00460221 | 1.106586541 |
| CD58 | 0.840690441 | 4.637924527 | 4.619232021 | 0.000135027 | 0.004607137 | 1.103791047 |
| GDPD5 | -1.493182456 | 4.302052866 | -4.614375355 | 0.000136631 | 0.004646677 | 1.0925954 |
| CHMP2B | 0.660773419 | 5.421129379 | 4.61274089 | 0.000137175 | 0.004646677 | 1.088827499 |
| BTF3L4 | 0.697643088 | 4.439481875 | 4.612151827 | 0.000137371 | 0.004646677 | 1.087469529 |
| ACTN4 | 0.901340022 | 7.580724059 | 4.611330757 | 0.000137646 | 0.004646677 | 1.085576697 |
| NFE2L2 | 1.463003727 | 7.625531152 | 4.611170738 | 0.000137699 | 0.004646677 | 1.085207801 |
| TIMM29 | 0.788544692 | 4.073872295 | 4.610613791 | 0.000137886 | 0.004646677 | 1.08392385 |
| COG8 | 0.826380196 | 3.819718847 | 4.610349887 | 0.000137975 | 0.004646677 | 1.083315459 |
| MOB4 | 0.911854548 | 4.614036158 | 4.607836971 | 0.00013882 | 0.004665123 | 1.07752224 |
| SLC23A3 | 1.341865345 | 0.158691309 | 4.607199777 | 0.000139035 | 0.004665123 | 1.076053246 |
| HSPA8 | 1.140388418 | 9.925888938 | 4.605234569 | 0.000139701 | 0.004678835 | 1.071522584 |
| SDHC | 0.795475389 | 7.01185622 | 4.604445387 | 0.00013997 | 0.004679204 | 1.069703153 |
| POU6F2 | 1 | #NAME? | 6.499603161 | 0.000204201 | 0.005517992 | 1.054422804 |
| ARRB2 | 1.15154321 | 5.691016104 | 4.59767423 | 0.000142293 | 0.004748152 | 1.054091975 |
| WNT7B | 2.30764284 | 4.161609058 | 4.595880905 | 0.000142915 | 0.004760169 | 1.049957238 |
| SERPINB3 | 2.859964472 | 11.25496061 | 4.594470371 | 0.000143406 | 0.004767792 | 1.04670503 |
| STAU1 | 0.803812713 | 6.427526566 | 4.592011623 | 0.000144266 | 0.004772198 | 1.041035912 |
| TFG | 0.619552886 | 6.545070205 | 4.589518361 | 0.000145143 | 0.004772198 | 1.035287095 |
| FAM102A | 0.772329444 | 6.106261165 | 4.589491787 | 0.000145153 | 0.004772198 | 1.035225822 |
| CDK5 | 0.717850567 | 4.557701686 | 4.588985704 | 0.000145332 | 0.004772198 | 1.034058912 |
| E2F5 | 1.154935928 | 3.244829643 | 4.588842634 | 0.000145382 | 0.004772198 | 1.033729025 |
| ITGA2 | 1.690186002 | 3.802664657 | 4.588530517 | 0.000145493 | 0.004772198 | 1.033009352 |
| ART3 | -1.773277178 | 0.215115599 | -4.588188138 | 0.000145614 | 0.004772198 | 1.0322199 |
| FOLH1 | -2.654678669 | 1.933313932 | -4.588119955 | 0.000145638 | 0.004772198 | 1.032062683 |
| ADAMTS8 | 1.855563702 | -0.019069924 | 4.585822477 | 0.000146454 | 0.004790305 | 1.026765134 |
| STAT3 | 0.943286122 | 6.540439752 | 4.583207491 | 0.000147388 | 0.004803588 | 1.020735352 |
| SLX4IP | 1.014883875 | 2.391880001 | 4.582299567 | 0.000147714 | 0.004805594 | 1.018641782 |
| SMR3A | -4.724726496 | #NAME? | -5.051456941 | 0.000182683 | 0.005248462 | 1.016485105 |
| ICAM5 | 2.446518664 | 2.192854568 | 4.581206428 | 0.000148107 | 0.004808298 | 1.016121107 |
| H2BC12 | 1.494235356 | 5.462386381 | 4.579942155 | 0.000148563 | 0.004808298 | 1.013205788 |
| DYNC1LI1 | 0.787601209 | 5.116789674 | 4.579867581 | 0.00014859 | 0.004808298 | 1.013033825 |
| RXRG | -2.640706619 | #NAME? | -4.80997045 | 0.000167264 | 0.005023967 | 1.008894093 |
| DIRAS1 | -3.571444343 | -1.61542404 | -4.577268288 | 0.000149533 | 0.004826954 | 1.007039956 |
| ZBTB22 | 0.824873868 | 3.932066157 | 4.5753419 | 0.000150235 | 0.004826954 | 1.002597704 |
| ZCCHC10 | 0.689011912 | 4.180312237 | 4.574964874 | 0.000150373 | 0.004826954 | 1.001728276 |
| FBXO34 | 1.103749385 | 4.869204294 | 4.574952653 | 0.000150377 | 0.004826954 | 1.001700093 |
| H2AC8 | 2.28613868 | 2.511257558 | 4.573909243 | 0.000150759 | 0.004826954 | 0.999293957 |
| NRDC | 0.792407668 | 6.282759035 | 4.571017421 | 0.000151824 | 0.004852483 | 0.992625228 |
| TXLNA | 0.692023161 | 5.346279323 | 4.568742947 | 0.000152666 | 0.004860162 | 0.987380048 |
| DENR | 0.704150493 | 5.990940249 | 4.568455533 | 0.000152773 | 0.004860162 | 0.986717234 |
| ITPRIPL2 | 0.973377177 | 4.10480273 | 4.565575394 | 0.000153847 | 0.004860162 | 0.98007519 |
| LRRC42 | 0.855614466 | 5.308133846 | 4.565286038 | 0.000153955 | 0.004860162 | 0.979407885 |
| VILL | 1.435256113 | 6.072550306 | 4.565201127 | 0.000153987 | 0.004860162 | 0.979212064 |
| UNC5D | -2.916459284 | #NAME? | -4.73672661 | 0.000168184 | 0.005023967 | 0.978247433 |
| GJB6 | 2.766369697 | 2.586153279 | 4.563785666 | 0.000154518 | 0.004860162 | 0.975947736 |
| PDPN | 2.044435158 | 4.267569177 | 4.562943723 | 0.000154835 | 0.004860162 | 0.974006037 |
| PBRM1 | 1.024539243 | 3.643392011 | 4.562680031 | 0.000154934 | 0.004860162 | 0.973397905 |
| CETN3 | 0.739822526 | 4.434015211 | 4.561704889 | 0.000155302 | 0.004860162 | 0.971149006 |
| HIF3A | -1.849710225 | 1.058778815 | -4.561660371 | 0.000155319 | 0.004860162 | 0.971046336 |
| TANC2 | 0.99696929 | 2.656340902 | 4.561080994 | 0.000155538 | 0.004860162 | 0.969710152 |
| KCNJ2 | 2.255052657 | 2.684436314 | 4.560820517 | 0.000155636 | 0.004860162 | 0.969109428 |
| SLC9A3R1 | 0.939505048 | 8.511931016 | 4.56032005 | 0.000155826 | 0.004860162 | 0.967955224 |
| ADAM9 | 1.375728113 | 6.484137776 | 4.559670536 | 0.000156072 | 0.004860162 | 0.966457274 |
| SERPINB8 | 1.359414692 | 3.385758611 | 4.557809354 | 0.000156781 | 0.004873871 | 0.962164864 |
| NOA1 | 0.851260164 | 5.08879526 | 4.555789986 | 0.000157553 | 0.004889516 | 0.957507573 |
| ZFAND3 | 0.764545521 | 5.424303555 | 4.553423149 | 0.000158463 | 0.004909374 | 0.952048836 |
| TEAD4 | 1.395526329 | 3.318436982 | 4.552529415 | 0.000158808 | 0.004911692 | 0.949987559 |
| TMCO3 | 0.874469234 | 5.894721502 | 4.550959361 | 0.000159415 | 0.004922119 | 0.946366411 |
| EPHB3 | -0.967152884 | 4.482706898 | -4.549170866 | 0.000160111 | 0.004935204 | 0.942241413 |
| EMILIN2 | 1.118148547 | 2.743004386 | 4.547788929 | 0.00016065 | 0.004943447 | 0.939054072 |
| F2RL1 | 1.101053773 | 4.158922391 | 4.545848233 | 0.00016141 | 0.004951373 | 0.934577948 |
| NKX1-2 | 2.882466306 | 0.025266133 | 4.544296067 | 0.000162021 | 0.004951373 | 0.930997916 |
| RDH14 | 0.657660088 | 5.070228047 | 4.543432556 | 0.000162362 | 0.004951373 | 0.929006235 |
| TNFSF11 | 2.948457993 | -0.526045478 | 4.543359259 | 0.000162391 | 0.004951373 | 0.928837176 |
| SLC12A4 | 1.050676885 | 4.510441509 | 4.542978841 | 0.000162541 | 0.004951373 | 0.927959742 |
| PAFAH1B2 | 0.754633578 | 5.231102367 | 4.541703667 | 0.000163046 | 0.004958454 | 0.925018537 |
| FRK | 1.001252251 | 3.033908511 | 4.540621305 | 0.000163476 | 0.004963229 | 0.922522041 |
| MICU1 | 0.590296842 | 5.223285371 | 4.535918283 | 0.000165357 | 0.005011985 | 0.911674219 |
| PRRG4 | 1.384147356 | 4.799774604 | 4.535145165 | 0.000165669 | 0.005013068 | 0.909890947 |
| BROX | 0.815754546 | 5.127539731 | 4.533809603 | 0.000166208 | 0.005015533 | 0.906810325 |
| TBCK | 1.460758142 | 3.108123212 | 4.533577808 | 0.000166302 | 0.005015533 | 0.906275664 |
| IL17B | -2.469185373 | #NAME? | -4.606562718 | 0.00017371 | 0.005111808 | 0.902823928 |
| LAMB3 | 2.380556032 | 6.922843475 | 4.532018017 | 0.000166934 | 0.005023967 | 0.902677801 |
| COPS2 | 0.829850699 | 4.102517389 | 4.530570711 | 0.000167523 | 0.005023967 | 0.899339375 |
| PNCK | 3.213796255 | 4.94776823 | 4.529304495 | 0.00016804 | 0.005023967 | 0.896418641 |
| PLEKHF2 | 1.144273 | 5.351823129 | 4.528818488 | 0.000168239 | 0.005023967 | 0.895297581 |
| ACVR1 | 0.975801678 | 4.614217597 | 4.525964946 | 0.000169411 | 0.005042416 | 0.888715335 |
| CCT3 | 0.751160969 | 7.514512492 | 4.524149466 | 0.000170162 | 0.005051111 | 0.884527534 |
| CASP4 | 0.94552607 | 6.729199659 | 4.523914106 | 0.000170259 | 0.005051111 | 0.88398462 |
| CCL28 | -2.263791189 | 4.724106888 | -4.523158124 | 0.000170573 | 0.00505217 | 0.882240771 |
| PPIF | 1.345522065 | 6.141338619 | 4.520618523 | 0.00017163 | 0.005067234 | 0.876382538 |
| RHBDL2 | 1.304876212 | 4.792846167 | 4.520598427 | 0.000171638 | 0.005067234 | 0.876336182 |
| SMARCAL1 | 0.696292356 | 3.848248567 | 4.517141267 | 0.000173089 | 0.005101766 | 0.86836126 |
| DLX1 | -2.150397051 | #NAME? | -4.877273592 | 0.000206779 | 0.005534403 | 0.86563849 |
| CALM3 | 0.9417081 | 6.864930391 | 4.513536023 | 0.000174614 | 0.005129259 | 0.860044613 |
| DNAJC5 | 0.747785129 | 5.667576486 | 4.511813809 | 0.000175347 | 0.005129259 | 0.856071731 |
| HS6ST1 | 1.056252162 | 5.697495189 | 4.511769294 | 0.000175366 | 0.005129259 | 0.855969042 |
| IL13RA1 | 0.891048681 | 5.712683834 | 4.511616726 | 0.000175432 | 0.005129259 | 0.85561709 |
| TAF12 | 0.660606159 | 4.689144662 | 4.508915785 | 0.000176589 | 0.005143487 | 0.849386376 |
| WLS | 1.035451411 | 6.19815807 | 4.507763553 | 0.000177085 | 0.005143487 | 0.846728312 |
| TRAF7 | 0.684914575 | 5.588956015 | 4.507756848 | 0.000177087 | 0.005143487 | 0.846712843 |
| CNOT10 | 0.751283599 | 4.728355098 | 4.507350712 | 0.000177263 | 0.005143487 | 0.845775931 |
| SLC13A2 | -2.989803789 | 2.716640309 | -4.507189007 | 0.000177332 | 0.005143487 | 0.845402894 |
| NECTIN2 | 0.840090364 | 6.329913213 | 4.503704329 | 0.000178843 | 0.005179038 | 0.837364056 |
| TKTL2 | -0.771585134 | #NAME? | -5.338698092 | 0.000249127 | 0.006065081 | 0.823324465 |
| EXOC6 | 0.950476361 | 3.74805737 | 4.497414076 | 0.000181602 | 0.005242249 | 0.822852758 |
| BZW1 | 0.878046496 | 7.338023901 | 4.495647876 | 0.000182385 | 0.005248462 | 0.818778168 |
| MRFAP1 | 0.605896787 | 8.763852344 | 4.495425346 | 0.000182483 | 0.005248462 | 0.818264792 |
| CLNS1A | 0.830420138 | 6.663684708 | 4.49407786 | 0.000183083 | 0.005251218 | 0.81515615 |
| CSTB | 1.815701637 | 9.731155883 | 4.493464205 | 0.000183357 | 0.005251218 | 0.813740448 |
| MEX3A | 1.377945895 | 0.552486533 | 4.491863573 | 0.000184072 | 0.00526343 | 0.810047775 |
| PIGF | 0.779152652 | 5.395963198 | 4.490140585 | 0.000184846 | 0.005277254 | 0.806072807 |
| UBFD1 | 1.009411806 | 4.401201386 | 4.484447547 | 0.000187426 | 0.005342513 | 0.792938716 |
| HEATR5A | 1.165571899 | 3.128770031 | 4.483507729 | 0.000187855 | 0.00534637 | 0.790770496 |
| MRM1 | 0.767225623 | 3.003939563 | 4.479708241 | 0.000189601 | 0.005371526 | 0.78200478 |
| GNG12 | 0.805515778 | 5.142763099 | 4.479186679 | 0.000189842 | 0.005371526 | 0.78080149 |
| PLXNB2 | 0.79136616 | 7.13777086 | 4.478007351 | 0.000190387 | 0.005371526 | 0.778080669 |
| RGCC | -1.431946607 | 6.140596188 | -4.477740481 | 0.000190511 | 0.005371526 | 0.777464973 |
| BID | 0.795318043 | 4.9489864 | 4.476150954 | 0.00019125 | 0.005384006 | 0.773797772 |
| NPTN | 0.869940107 | 7.089797199 | 4.474788869 | 0.000191885 | 0.00539354 | 0.770655291 |
| MICU2 | 0.614950391 | 5.996953258 | 4.473114061 | 0.000192669 | 0.005407219 | 0.766791312 |
| PRNP | 1.107907471 | 7.046088814 | 4.468279346 | 0.00019495 | 0.005442484 | 0.75563699 |
| PSMB5 | 0.718338716 | 7.369761677 | 4.46813846 | 0.000195017 | 0.005442484 | 0.755311948 |
| CDT1 | 2.209894472 | 2.705031519 | 4.467411474 | 0.000195363 | 0.005442484 | 0.753634685 |
| TRMT1L | 1.032406555 | 4.150398075 | 4.467286926 | 0.000195422 | 0.005442484 | 0.753347335 |
| MROH7 | -1.309778327 | 2.937331915 | -4.466508644 | 0.000195793 | 0.005444469 | 0.751551725 |
| MYL12A | 0.676431479 | 9.394955318 | 4.464762518 | 0.000196627 | 0.005455965 | 0.747523149 |
| CLEC12A | 2.281250504 | 2.124535219 | 4.464229199 | 0.000196882 | 0.005455965 | 0.7462927 |
| PPME1 | 0.837207101 | 5.195686491 | 4.463762555 | 0.000197106 | 0.005455965 | 0.745216079 |
| SLC30A5 | 0.642016373 | 5.619865467 | 4.462182278 | 0.000197866 | 0.00546471 | 0.741570127 |
| DDR1 | 1.030597758 | 7.641241273 | 4.461856455 | 0.000198023 | 0.00546471 | 0.740818399 |
| POLR3D | 0.788893642 | 3.04258587 | 4.460681111 | 0.00019859 | 0.005469863 | 0.738106686 |
| SDR42E1 | 0.897426124 | 3.101335914 | 4.459916969 | 0.00019896 | 0.005469863 | 0.736343683 |
| VEZT | 0.825441993 | 4.507420385 | 4.459277453 | 0.00019927 | 0.005469863 | 0.734868209 |
| FCN2 | -3.071882873 | -1.548049832 | -4.45898396 | 0.000199413 | 0.005469863 | 0.734191072 |
| PANK2 | 0.585773115 | 4.260128043 | 4.457610131 | 0.000200081 | 0.005479925 | 0.731021409 |
| TMEM40 | 2.58109372 | 3.963985059 | 4.455614919 | 0.000201055 | 0.005498331 | 0.7264181 |
| TM4SF19 | 2.022927208 | -0.754170491 | 4.453831536 | 0.00020193 | 0.005512003 | 0.722303509 |
| GCLM | 1.635494001 | 4.85825137 | 4.451138896 | 0.000203258 | 0.005517992 | 0.716091085 |
| SLC38A5 | 2.11052084 | 3.924727426 | 4.450532905 | 0.000203559 | 0.005517992 | 0.71469295 |
| PTMA | 0.840696946 | 10.96408648 | 4.450191253 | 0.000203728 | 0.005517992 | 0.713904694 |
| YTHDF2 | 0.601540445 | 6.160261566 | 4.449639514 | 0.000204002 | 0.005517992 | 0.712631725 |
| ZFPM1 | 0.797389811 | 2.173525918 | 4.44733085 | 0.000205152 | 0.005531514 | 0.707305193 |
| TMEM190 | 4.190889545 | 6.903088396 | 4.447014165 | 0.00020531 | 0.005531514 | 0.706574537 |
| CD300C | 1.471221899 | 1.066661706 | 4.444045661 | 0.0002068 | 0.005534403 | 0.699725613 |
| PDHB | 0.706295566 | 6.677605847 | 4.442495448 | 0.000207582 | 0.005534403 | 0.696148965 |
| ABCA7 | 0.853781724 | 5.65357782 | 4.442161604 | 0.000207751 | 0.005534403 | 0.695378719 |
| SDR16C5 | 1.642662202 | 4.313759738 | 4.44212624 | 0.000207769 | 0.005534403 | 0.695297127 |
| MRPL49 | 0.596999482 | 5.67339085 | 4.441805008 | 0.000207931 | 0.005534403 | 0.694555982 |
| UBE2D3 | 0.637710523 | 7.51418213 | 4.441094969 | 0.000208291 | 0.005534403 | 0.69291778 |
| SIGLEC9 | 1.836909026 | 0.821437756 | 4.440643066 | 0.00020852 | 0.005534403 | 0.691875149 |
| NRAS | 1.042807786 | 4.419423512 | 4.440189245 | 0.000208751 | 0.005534403 | 0.690828093 |
| CYB561D2 | 0.677157434 | 4.872986489 | 4.440175474 | 0.000208758 | 0.005534403 | 0.69079632 |
| APOC2 | 2.680174414 | 0.870093764 | 4.440161359 | 0.000208765 | 0.005534403 | 0.690763753 |
| CCT5 | 0.910660556 | 6.653062729 | 4.438411585 | 0.000209656 | 0.005549945 | 0.686726674 |
| DMRTA1 | -2.071102673 | 1.091410501 | -4.437289515 | 0.00021023 | 0.005557041 | 0.684137833 |
| ITGB6 | 1.625803601 | 3.634589899 | 4.436660209 | 0.000210553 | 0.005557486 | 0.682685899 |
| ANKRD18A | 1.334070076 | 1.166893506 | 4.434880326 | 0.000211467 | 0.005571403 | 0.678579351 |
| SLC46A3 | 0.975904401 | 4.502775541 | 4.434442892 | 0.000211692 | 0.005571403 | 0.677570103 |
| ARPC3 | 0.698835597 | 9.093474156 | 4.432620338 | 0.000212634 | 0.005586438 | 0.673365106 |
| ADAM8 | 1.636420714 | 4.413876522 | 4.43214944 | 0.000212878 | 0.005586438 | 0.67227865 |
| DERL1 | 0.766295368 | 5.526031829 | 4.430780983 | 0.000213589 | 0.005597009 | 0.669121349 |
| SAP30 | 0.777018603 | 4.903066792 | 4.427566658 | 0.000215267 | 0.005626445 | 0.661705273 |
| ZNF821 | -0.662435128 | 3.988964562 | -4.427229615 | 0.000215444 | 0.005626445 | 0.660927649 |
| RAB7A | 0.705966756 | 7.391711699 | 4.425758195 | 0.000216217 | 0.005626445 | 0.657532799 |
| KDM5B | 1.039479987 | 4.466775339 | 4.423806889 | 0.000217247 | 0.005626445 | 0.653030765 |
| BICDL1 | 1.599506189 | 4.478852501 | 4.423479385 | 0.000217421 | 0.005626445 | 0.652275152 |
| SLAIN1 | -1.828565352 | 1.715460043 | -4.42295582 | 0.000217698 | 0.005626445 | 0.651067189 |
| H4C12 | 2.443050513 | #NAME? | 5.903044329 | 0.000243545 | 0.005993382 | 0.644619359 |
| PARS2 | 0.758910978 | 2.165913965 | 4.419955811 | 0.000219294 | 0.005626445 | 0.644145618 |
| AMPD3 | 1.22457117 | 4.283438854 | 4.419768312 | 0.000219395 | 0.005626445 | 0.643713023 |
| ADGRG2 | -2.956263367 | -1.699260719 | -4.419675339 | 0.000219444 | 0.005626445 | 0.643498518 |
| PITPNM1 | 1.581837094 | 5.408088949 | 4.41965121 | 0.000219457 | 0.005626445 | 0.643442847 |
| CERS6 | 1.057401803 | 4.423956585 | 4.419226433 | 0.000219684 | 0.005626445 | 0.64246281 |
| OSTC | 0.790367595 | 7.155086051 | 4.419070501 | 0.000219768 | 0.005626445 | 0.642103048 |
| TRA2A | 0.740404213 | 7.03514588 | 4.418838257 | 0.000219892 | 0.005626445 | 0.64156722 |
| HOMEZ | 0.81874082 | 3.590613768 | 4.418108534 | 0.000220283 | 0.005626445 | 0.639883619 |
| MAGED4 | 2.356976874 | 3.6984781 | 4.417134688 | 0.000220806 | 0.005626445 | 0.637636786 |
| ZNF609 | 1.186321967 | 3.009883176 | 4.416968672 | 0.000220896 | 0.005626445 | 0.637253759 |
| MRPL44 | 0.719471644 | 5.411687325 | 4.416961043 | 0.0002209 | 0.005626445 | 0.637236157 |
| TOR1AIP2 | 0.594743393 | 4.167401582 | 4.413505056 | 0.000222767 | 0.005666066 | 0.629262616 |
| F11R | 1.026533313 | 6.817582091 | 4.410864334 | 0.000224204 | 0.005693396 | 0.62317005 |
| OPN3 | 1.088682907 | 3.559923178 | 4.410382436 | 0.000224467 | 0.005693396 | 0.622058238 |
| HIP1R | -0.962539508 | 5.2768621 | -4.408110571 | 0.000225713 | 0.005717012 | 0.616816709 |
| KRAS | 0.969258351 | 4.240071827 | 4.406564457 | 0.000226564 | 0.0057306 | 0.613249606 |
| KLF16 | 0.793089306 | 3.636088034 | 4.403428126 | 0.000228302 | 0.005766522 | 0.606013677 |
| CAMK1D | 0.843541882 | 4.33627914 | 4.401559076 | 0.000229343 | 0.005784798 | 0.601701555 |
| ADGRF1 | 2.939544844 | 4.237956472 | 4.400168166 | 0.000230122 | 0.00579035 | 0.598492568 |
| AHNAK2 | 2.852744665 | 2.773072278 | 4.400027826 | 0.0002302 | 0.00579035 | 0.598168788 |
| XPR1 | 1.03603127 | 3.879735784 | 4.398441434 | 0.000231092 | 0.005804738 | 0.594508817 |
| HSP90AB1 | 0.771439844 | 9.496625861 | 4.396401204 | 0.000232243 | 0.005825609 | 0.589801811 |
| CD68 | 1.573684162 | 5.689412035 | 4.395677045 | 0.000232653 | 0.005827855 | 0.588131112 |
| S100A11 | 0.926770931 | 10.37226451 | 4.394848024 | 0.000233123 | 0.005829274 | 0.586218491 |
| ATP6V0B | 0.604613232 | 7.362009209 | 4.394447568 | 0.00023335 | 0.005829274 | 0.585294608 |
| ULK2 | 1.047852572 | 3.099560196 | 4.392061821 | 0.00023471 | 0.005855204 | 0.579790517 |
| CCT6A | 0.815701286 | 6.928304133 | 4.389940795 | 0.000235926 | 0.005877469 | 0.574897185 |
| EXT1 | 0.839375575 | 3.311044935 | 4.389287059 | 0.000236302 | 0.005878782 | 0.573388984 |
| PADI2 | -2.292586751 | 2.425762712 | -4.386594791 | 0.000237857 | 0.005909376 | 0.567177813 |
| KLC2 | 0.856383042 | 4.112612982 | 4.384148917 | 0.000239278 | 0.005932786 | 0.561535127 |
| C5orf15 | 0.987743701 | 6.555116321 | 4.38338616 | 0.000239723 | 0.005932786 | 0.559775439 |
| ZDHHC13 | 0.930436322 | 5.621763931 | 4.383205484 | 0.000239829 | 0.005932786 | 0.559358616 |
| VDR | 1.281866852 | 3.078224398 | 4.382734222 | 0.000240104 | 0.005932786 | 0.558271414 |
| STAU2 | 0.794281702 | 4.276940921 | 4.37808279 | 0.00024284 | 0.00598624 | 0.547540622 |
| KPNA6 | 0.821662998 | 4.379786415 | 4.37793779 | 0.000242926 | 0.00598624 | 0.54720611 |
| DGKZ | 0.666851453 | 5.548237324 | 4.374862438 | 0.000244752 | 0.00601495 | 0.54011141 |
| WSB2 | 0.75449544 | 5.351686935 | 4.372101858 | 0.000246404 | 0.006047361 | 0.53374294 |
| RNF207 | 1.122359293 | 4.724795719 | 4.371458988 | 0.00024679 | 0.006048404 | 0.532259893 |
| CHRM3 | -2.422428138 | -0.138813375 | -4.370924557 | 0.000247111 | 0.006048404 | 0.531027007 |
| MFSD6 | 0.897445635 | 5.856131737 | 4.370171257 | 0.000247565 | 0.006051368 | 0.529289215 |
| RAB14 | 0.741917812 | 6.177957357 | 4.367958214 | 0.000248903 | 0.006065081 | 0.524183962 |
| TRMT10C | 0.62921556 | 5.085820424 | 4.367888611 | 0.000248945 | 0.006065081 | 0.524023396 |
| SEC24D | 1.155701348 | 5.055018136 | 4.366499853 | 0.000249789 | 0.006065534 | 0.520819703 |
| HDAC1 | 0.705399964 | 7.203145501 | 4.366461657 | 0.000249812 | 0.006065534 | 0.520731591 |
| QTRT1 | -0.629439025 | 6.114311442 | -4.365271204 | 0.000250538 | 0.006067337 | 0.517985376 |
| COQ9 | 0.610933347 | 5.775418112 | 4.365244869 | 0.000250554 | 0.006067337 | 0.517924627 |
| KAZN | 0.811014496 | 4.68257751 | 4.363064297 | 0.000251888 | 0.006083177 | 0.51289438 |
| KCNQ4 | -1.769881582 | -0.402364477 | -4.362911065 | 0.000251982 | 0.006083177 | 0.512540899 |
| SH3TC1 | 1.039638139 | 4.267431636 | 4.362537901 | 0.000252211 | 0.006083177 | 0.511680071 |
| DAPP1 | 1.552066166 | 5.174352245 | 4.361503807 | 0.000252847 | 0.006090442 | 0.509294596 |
| ABHD3 | 1.03573303 | 4.981397025 | 4.359102177 | 0.000254331 | 0.006118074 | 0.503754494 |
| LRRC4 | 2.431238889 | 3.277461583 | 4.358147151 | 0.000254923 | 0.006124222 | 0.50155145 |
| MCUB | 1.41821154 | 4.378395199 | 4.357492779 | 0.00025533 | 0.0061259 | 0.500041954 |
| EIF4A3 | 0.850014662 | 6.634176306 | 4.35690676 | 0.000255695 | 0.006126568 | 0.49869014 |
| TRIM47 | 1.15457944 | 4.779036482 | 4.355400573 | 0.000256635 | 0.006140997 | 0.495215721 |
| LAPTM4B | 0.993862864 | 6.243818493 | 4.354703467 | 0.000257071 | 0.006143351 | 0.49360767 |
| PARP4 | 0.916166274 | 5.174790466 | 4.353582754 | 0.000257774 | 0.006152061 | 0.491022472 |
| PEBP4 | -3.729607561 | #NAME? | -4.383538369 | 0.000263461 | 0.006246806 | 0.488217086 |
| HEMK1 | 0.710020933 | 3.321407017 | 4.350528111 | 0.000259699 | 0.006189887 | 0.483976266 |
| CST3 | -0.827686803 | 9.889585603 | -4.347514116 | 0.000261613 | 0.006227339 | 0.477023929 |
| CRLF2 | 2.104427118 | -0.555136009 | 4.346550946 | 0.000262227 | 0.006233808 | 0.474802221 |
| RPP14 | 1.564759648 | 2.36650303 | 4.345437152 | 0.00026294 | 0.006242584 | 0.472233089 |
| XPNPEP1 | 0.635217422 | 6.290686056 | 4.343065613 | 0.000264463 | 0.00625537 | 0.466762832 |
| SERINC5 | 1.351773595 | 4.374133953 | 4.342992655 | 0.00026451 | 0.00625537 | 0.466594546 |
| UPRT | 0.867211165 | 3.85491174 | 4.340127142 | 0.000266363 | 0.006291007 | 0.459984971 |
| CAST | 0.915073582 | 6.844775967 | 4.338504497 | 0.000267418 | 0.006307732 | 0.456242236 |
| TRIP11 | 0.927838497 | 3.327800554 | 4.337497165 | 0.000268075 | 0.006315039 | 0.453918777 |
| TUBA3D | 2.263402845 | #NAME? | 4.376605015 | 0.000296231 | 0.006717279 | 0.447759895 |
| PDIA4 | 0.91712184 | 7.109761923 | 4.334805695 | 0.000269838 | 0.006340154 | 0.447710841 |
| PAK3 | -1.422512112 | -0.020283376 | -4.3335165 | 0.000270687 | 0.006349236 | 0.444737316 |
| COPB1 | 0.845191203 | 6.462891784 | 4.33315875 | 0.000270923 | 0.006349236 | 0.443912173 |
| ATP13A4 | 1.321763723 | 2.9753952 | 4.329357601 | 0.000273443 | 0.006400055 | 0.435144993 |
| SGO2 | 2.032485369 | 1.749911823 | 4.328391185 | 0.000274088 | 0.006400282 | 0.432916031 |
| LOC102724159 | 1.233283972 | 3.839836205 | 4.328059587 | 0.000274309 | 0.006400282 | 0.432151229 |
| OXGR1 | -2.642162064 | 0.867868276 | -4.327761104 | 0.000274509 | 0.006400282 | 0.431462806 |
| BAX | 0.846637874 | 6.443483681 | 4.325610127 | 0.000275951 | 0.00641892 | 0.426501816 |
| SLC25A24 | 1.274735889 | 4.0516964 | 4.325394543 | 0.000276096 | 0.00641892 | 0.426004599 |
| RPF1 | 0.700821138 | 5.112125876 | 4.324991645 | 0.000276367 | 0.00641892 | 0.42507537 |
| NXPH4 | 3.204314129 | 1.582180551 | 4.323623804 | 0.00027729 | 0.00643213 | 0.421920644 |
| ARPC2 | 0.887184984 | 8.622596471 | 4.322782953 | 0.000277858 | 0.006437109 | 0.419981359 |
| SLC37A2 | -1.347991436 | 3.815450039 | -4.320121153 | 0.000279666 | 0.00646749 | 0.413842424 |
| VASP | 0.84055274 | 5.379466313 | 4.319805599 | 0.000279881 | 0.00646749 | 0.413114666 |
| BMP3 | 1.649783342 | 2.59131169 | 4.319108031 | 0.000280357 | 0.006470268 | 0.41150588 |
| FER1L6 | 3.538537536 | 2.313319528 | 4.317447387 | 0.000281493 | 0.00648453 | 0.407676004 |
| NCF2 | 1.814605774 | 4.16276143 | 4.31657885 | 0.00028209 | 0.00648453 | 0.405672948 |
| GPR141 | 2.05266629 | -0.182178295 | 4.31576126 | 0.000282652 | 0.00648453 | 0.403787401 |
| DDB1 | 0.630155639 | 6.623597219 | 4.315608664 | 0.000282757 | 0.00648453 | 0.403435481 |
| NBAS | 0.604406374 | 3.934474396 | 4.315607788 | 0.000282758 | 0.00648453 | 0.403433461 |
| WDTC1 | 0.866656454 | 4.767370899 | 4.314148586 | 0.000283765 | 0.006493833 | 0.400068242 |
| FBXO22 | 0.791405943 | 3.877230623 | 4.313985317 | 0.000283878 | 0.006493833 | 0.399691714 |
| IFI16 | 1.137986042 | 7.146703857 | 4.311090368 | 0.000285887 | 0.006525669 | 0.39301548 |
| SMAD3 | 1.13242718 | 5.170091299 | 4.310946402 | 0.000285987 | 0.006525669 | 0.392683476 |
| C2CD4D | -1.311890458 | 1.132889141 | -4.309653475 | 0.000286889 | 0.006538051 | 0.38970182 |
| TSHZ3 | 1.315106886 | 2.636651774 | 4.308785042 | 0.000287497 | 0.006539366 | 0.387699118 |
| PRELID3B | 0.845672572 | 5.426291486 | 4.308543454 | 0.000287666 | 0.006539366 | 0.387141991 |
| CNTFR | -4.723639311 | #NAME? | -4.370627155 | 0.000300378 | 0.006762374 | 0.383252955 |
| KHSRP | 0.824637784 | 5.518467293 | 4.298899783 | 0.000294504 | 0.006686455 | 0.364903566 |
| GLYATL1 | -2.792243651 | #NAME? | -4.357885693 | 0.000309414 | 0.006842736 | 0.35515049 |
| DYNC1I2 | 0.728223444 | 5.883838351 | 4.294364834 | 0.000297776 | 0.006743895 | 0.35444651 |
| POC1A | 1.936078595 | 3.306808072 | 4.292899368 | 0.000298841 | 0.006758687 | 0.351067402 |
| NUP50 | 1.06506448 | 5.390209468 | 4.292141795 | 0.000299393 | 0.006758687 | 0.349320588 |
| ATP13A3 | 1.38811425 | 5.16762179 | 4.291934704 | 0.000299544 | 0.006758687 | 0.348843079 |
| ZNF385A | 1.537708416 | 4.75540384 | 4.29033868 | 0.000300711 | 0.006762374 | 0.345163006 |
| CIAO2A | 0.722431844 | 6.482553317 | 4.290185765 | 0.000300823 | 0.006762374 | 0.344810421 |
| PIGP | 0.679504448 | 5.437226434 | 4.28824478 | 0.000302248 | 0.006775869 | 0.340335019 |
| ZKSCAN7 | 1.405957059 | 2.39437701 | 4.288234047 | 0.000302256 | 0.006775869 | 0.340310272 |
| ZDHHC20 | 1.010110441 | 4.927782973 | 4.287847936 | 0.000302541 | 0.006775869 | 0.33942001 |
| GDI2 | 0.706287245 | 7.694036792 | 4.285709704 | 0.000304121 | 0.006800189 | 0.334489914 |
| CEMIP | 2.539008575 | 2.487351682 | 4.285341566 | 0.000304394 | 0.006800189 | 0.33364111 |
| TNIP1 | 0.60757743 | 6.391978153 | 4.283680954 | 0.000305627 | 0.006811448 | 0.329812335 |
| UXS1 | 0.790372633 | 5.526958776 | 4.281997816 | 0.000306883 | 0.006824388 | 0.32593168 |
| TRIM59 | 1.409011278 | 2.682593869 | 4.281896928 | 0.000306959 | 0.006824388 | 0.325699072 |
| C12orf60 | 1.07043388 | 1.646857454 | 4.281124738 | 0.000307537 | 0.00682889 | 0.323918727 |
| NSF | 0.941328531 | 4.934375353 | 4.278438602 | 0.000309556 | 0.006842736 | 0.317725728 |
| NNAT | 1.651290277 | 1.07295737 | 4.278293209 | 0.000309665 | 0.006842736 | 0.317390521 |
| SLC6A9 | 1.279276357 | 2.915126212 | 4.277464299 | 0.000310291 | 0.006848247 | 0.315479469 |
| NRBF2 | 0.61195803 | 4.707358114 | 4.274822167 | 0.000312295 | 0.006879063 | 0.309388129 |
| SLC35A2 | 1.153022456 | 5.179775555 | 4.274626089 | 0.000312444 | 0.006879063 | 0.308936084 |
| TM9SF2 | 0.728788897 | 7.354009815 | 4.272269247 | 0.000314243 | 0.006902645 | 0.30350261 |
| UBE2H | 0.801935164 | 6.230845719 | 4.272228466 | 0.000314274 | 0.006902645 | 0.303408594 |
| OIT3 | 2.423859504 | -2.550522982 | 4.271134593 | 0.000315113 | 0.006912714 | 0.300886817 |
| CAMKK1 | -1.092966692 | 2.793798041 | -4.27012873 | 0.000315886 | 0.006914233 | 0.29856796 |
| KCTD1 | 1.222805197 | 5.492507777 | 4.269736265 | 0.000316188 | 0.006914233 | 0.2976632 |
| SMIM13 | 0.876449355 | 2.312531333 | 4.269561559 | 0.000316323 | 0.006914233 | 0.297260447 |
| GLRX2 | 0.656110316 | 3.860762619 | 4.265101318 | 0.000319778 | 0.006973382 | 0.286978406 |
| SRC | 1.022800616 | 5.072634704 | 4.265079122 | 0.000319795 | 0.006973382 | 0.28692724 |
| KDSR | 0.606878642 | 4.805057122 | 4.264202963 | 0.000320479 | 0.006979912 | 0.284907515 |
| PARD3 | 0.998321305 | 4.716238362 | 4.262156856 | 0.00032208 | 0.006998027 | 0.280190893 |
| MTCH2 | 0.796523875 | 5.661027982 | 4.261085971 | 0.000322921 | 0.007007934 | 0.277722363 |
| UBTD1 | 1.084568054 | 4.776113122 | 4.259690354 | 0.000324021 | 0.007023418 | 0.274505322 |
| CHRM1 | -4.414480588 | #NAME? | -4.319780817 | 0.0003381 | 0.007124783 | 0.271091178 |
| RASGEF1C | -2.334590523 | #NAME? | -4.629492565 | 0.000400729 | 0.007776713 | 0.27030142 |
| IL11RA | -1.116882118 | 4.823351768 | -4.255683568 | 0.000327199 | 0.00706122 | 0.265269535 |
| TMPRSS6 | 1.470175812 | -2.084037324 | 4.255671266 | 0.000327209 | 0.00706122 | 0.265241179 |
| GTF2I | 0.811759545 | 7.458851319 | 4.2555342 | 0.000327318 | 0.00706122 | 0.264925245 |
| SUGT1 | 0.631153086 | 3.171000819 | 4.254030656 | 0.000328519 | 0.007070366 | 0.261459628 |
| TRIM11 | 0.680743131 | 4.928558363 | 4.254030048 | 0.00032852 | 0.007070366 | 0.261458227 |
| NKX3-1 | -1.996924662 | 2.824557477 | -4.252758291 | 0.000329539 | 0.007077514 | 0.258526916 |
| CLINT1 | 1.017884493 | 6.730001581 | 4.252568108 | 0.000329692 | 0.007077514 | 0.258088561 |
| ALX1 | -3.327859364 | #NAME? | -4.28007652 | 0.00033712 | 0.007124783 | 0.254649444 |
| USB1 | 0.846852923 | 4.407452446 | 4.250566338 | 0.000331303 | 0.007084731 | 0.253474713 |
| MTFP1 | 1.254024734 | 4.88351731 | 4.250077071 | 0.000331698 | 0.007084731 | 0.252347025 |
| PAK2 | 0.860686819 | 4.864828886 | 4.250012237 | 0.000331751 | 0.007084731 | 0.252197593 |
| GLRX3 | 0.976107395 | 6.293488577 | 4.249810063 | 0.000331914 | 0.007084731 | 0.251731614 |
| CHEK2 | 0.920527041 | 4.619922084 | 4.249248121 | 0.000332369 | 0.007086118 | 0.250436432 |
| MOB1A | 1.001344862 | 5.614789667 | 4.248273167 | 0.000333159 | 0.007088957 | 0.248189345 |
| SF3B3 | 0.839082631 | 4.737328671 | 4.248122262 | 0.000333282 | 0.007088957 | 0.24784154 |
| TRIL | -1.759327781 | 0.438463353 | -4.247341734 | 0.000333916 | 0.007094151 | 0.246042591 |
| TP53RK | 0.768191661 | 4.084645081 | 4.244666298 | 0.000336099 | 0.007124783 | 0.239876406 |
| IPO13 | 0.704140745 | 4.724494481 | 4.243717 | 0.000336877 | 0.007124783 | 0.237688564 |
| ZSWIM6 | 1.309227634 | 3.516557728 | 4.243693526 | 0.000336896 | 0.007124783 | 0.237634465 |
| UBE2D1 | 0.944177768 | 3.923616089 | 4.242968093 | 0.000337492 | 0.007124783 | 0.235962581 |
| ARHGEF18 | 0.729410177 | 4.24789035 | 4.242672297 | 0.000337736 | 0.007124783 | 0.235280872 |
| ZNF319 | 0.8461647 | 2.580523749 | 4.24006577 | 0.000339887 | 0.007130706 | 0.229273826 |
| TBC1D24 | -0.81708332 | 2.706799316 | -4.240065398 | 0.000339887 | 0.007130706 | 0.229272969 |
| B3GNT9 | 0.909427213 | 3.866778464 | 4.240026923 | 0.000339919 | 0.007130706 | 0.229184299 |
| GALNT7 | 1.48913826 | 5.01457126 | 4.239989866 | 0.00033995 | 0.007130706 | 0.229098898 |
| HILPDA | 1.331167621 | 4.646177625 | 4.238560621 | 0.000341135 | 0.00714733 | 0.225805115 |
| ZDHHC16 | 0.824180355 | 5.204174644 | 4.237420971 | 0.000342083 | 0.007158951 | 0.223178762 |
| TOMM40L | 0.783927499 | 3.264679502 | 4.236370561 | 0.00034296 | 0.007169041 | 0.220758096 |
| FAM180B | -2.147295123 | #NAME? | -4.46865266 | 0.000396321 | 0.007705171 | 0.21665099 |
| STRA6 | 2.110206994 | 4.839988002 | 4.233842882 | 0.000345078 | 0.007205035 | 0.214933194 |
| FZD6 | 1.132234918 | 5.227205787 | 4.232592442 | 0.00034613 | 0.007218726 | 0.212051689 |
| RBMS1 | 0.864054428 | 4.968182966 | 4.230722779 | 0.00034771 | 0.007235081 | 0.207743329 |
| BTG3 | 1.062526692 | 5.790042722 | 4.228785804 | 0.000349355 | 0.007260989 | 0.203279964 |
| CLTC | 0.800381332 | 5.982170516 | 4.226757121 | 0.000351085 | 0.007288627 | 0.198605393 |
| ZFAND6 | 0.618793909 | 6.668160126 | 4.225969465 | 0.000351759 | 0.007294297 | 0.196790477 |
| ATP2B3 | 2.358406428 | #NAME? | 4.253011089 | 0.000359587 | 0.007380861 | 0.193555228 |
| SEMA4B | 1.503610829 | 6.661577081 | 4.224249683 | 0.000353236 | 0.007313204 | 0.192827821 |
| ASXL2 | 1.135109613 | 2.418350474 | 4.223971455 | 0.000353476 | 0.007313204 | 0.192186746 |
| CPT2 | 0.651243061 | 4.895508431 | 4.220960787 | 0.000356077 | 0.007358657 | 0.185249913 |
| MISP | 2.37470019 | 5.423113563 | 4.21942113 | 0.000357415 | 0.007377556 | 0.181702518 |
| KMT5C | 0.751867368 | 3.675356239 | 4.218412362 | 0.000358294 | 0.007377556 | 0.179378339 |
| STAT6 | 0.701374744 | 6.860669861 | 4.218099611 | 0.000358567 | 0.007377556 | 0.178657772 |
| CRYAB | -2.058428302 | 4.16263443 | -4.217581547 | 0.00035902 | 0.007377556 | 0.177464182 |
| ARPC5 | 0.767528549 | 5.612828489 | 4.216359522 | 0.00036009 | 0.007382863 | 0.174648734 |
| BCAP29 | 1.118978441 | 4.742373021 | 4.215012305 | 0.000361274 | 0.007395113 | 0.171544907 |
| YWHAE | 0.666835021 | 8.808695178 | 4.214364835 | 0.000361844 | 0.007395113 | 0.170053235 |
| UBA3 | 0.710312998 | 6.108158884 | 4.213604525 | 0.000362514 | 0.007399201 | 0.168301609 |
| B4GALNT1 | -1.717288632 | 0.569939544 | -4.213074936 | 0.000362982 | 0.007400446 | 0.167081539 |
| CELSR1 | 1.52172224 | 5.52216976 | 4.210200298 | 0.000365533 | 0.007437281 | 0.160459075 |
| BGLAP | -3.247443643 | #NAME? | -4.304524308 | 0.0003885 | 0.007671295 | 0.160199695 |
| VPS4B | 0.933653249 | 5.519548425 | 4.209888417 | 0.00036581 | 0.007437281 | 0.159740594 |
| SMARCC1 | 0.907123075 | 4.676027492 | 4.209565608 | 0.000366098 | 0.007437281 | 0.158996941 |
| OSTF1 | 0.663672316 | 6.589092683 | 4.208906914 | 0.000366686 | 0.007437281 | 0.157479519 |
| TAX1BP1 | 0.85912375 | 6.783837888 | 4.208741285 | 0.000366834 | 0.007437281 | 0.157097964 |
| SPECC1 | 0.916059571 | 3.473768792 | 4.207546056 | 0.000367903 | 0.007447186 | 0.154344582 |
| SCNN1D | -0.922258115 | 2.630482017 | -4.207280409 | 0.000368141 | 0.007447186 | 0.153732632 |
| IRF2 | 0.870069047 | 5.524246068 | 4.205840911 | 0.000369434 | 0.007465037 | 0.150416609 |
| MYOF | 1.250151803 | 6.199081884 | 4.205250598 | 0.000369966 | 0.00746748 | 0.149056786 |
| FANCF | 0.958123908 | 3.518895751 | 4.202557798 | 0.0003724 | 0.007506432 | 0.142853895 |
| PPIL1 | 0.917482434 | 5.064208368 | 4.202203991 | 0.000372721 | 0.007506432 | 0.142038915 |
| PRSS23 | 1.133196159 | 8.711714199 | 4.200691746 | 0.000374096 | 0.007525795 | 0.138555565 |
| OPCML | -2.795897891 | -3.009148752 | -4.198091916 | 0.000376473 | 0.007560253 | 0.132567214 |
| ITPRID1 | -3.655557832 | -1.044955594 | -4.197908613 | 0.000376641 | 0.007560253 | 0.132145008 |
| RAE1 | 0.587733779 | 5.425738864 | 4.196258618 | 0.000378157 | 0.007582325 | 0.128344598 |
| MUC20 | 1.732363643 | 7.468004825 | 4.193796292 | 0.000380432 | 0.00761953 | 0.122673327 |
| CDH19 | -4.327159522 | #NAME? | -4.221560204 | 0.000387583 | 0.007661505 | 0.122572056 |
| GPI | 0.939941214 | 6.959858087 | 4.191955725 | 0.000382141 | 0.007636866 | 0.118434234 |
| SCRIB | 0.643550537 | 5.144754177 | 4.19150862 | 0.000382557 | 0.007636866 | 0.117404506 |
| IKBIP | 0.913091841 | 4.726644756 | 4.190847422 | 0.000383174 | 0.007640786 | 0.115881708 |
| RHNO1 | 0.762516364 | 4.759132978 | 4.189653711 | 0.000384289 | 0.007654637 | 0.113132527 |
| QRFP | 1.447329758 | -2.00391458 | 4.187777351 | 0.000386049 | 0.007661505 | 0.108811267 |
| RBM38 | 1.24571666 | 5.367431954 | 4.187608515 | 0.000386208 | 0.007661505 | 0.108422442 |
| MAP2K1 | 0.757460229 | 5.626531674 | 4.187006523 | 0.000386775 | 0.007661505 | 0.107036083 |
| AQP5 | -1.105071473 | 8.219658304 | -4.187004814 | 0.000386776 | 0.007661505 | 0.107032147 |
| AGFG2 | -1.186443101 | 3.952174723 | -4.186200204 | 0.000387535 | 0.007661505 | 0.105179189 |
| NBDY | 0.692378589 | 4.082409515 | 4.184387228 | 0.00038925 | 0.007677758 | 0.101004117 |
| ASCC3 | 0.948954284 | 3.288409545 | 4.183854422 | 0.000389755 | 0.007679397 | 0.099777151 |
| ATP6V1D | 1.031741626 | 6.267757647 | 4.182441462 | 0.000391098 | 0.007686518 | 0.096523376 |
| EIF4G2 | 0.77391098 | 8.390782674 | 4.181843117 | 0.000391669 | 0.007686518 | 0.095145524 |
| PTPN9 | 0.707345567 | 3.128368872 | 4.181710639 | 0.000391795 | 0.007686518 | 0.094840459 |
| EIF2S2 | 0.592758432 | 7.231667098 | 4.181698054 | 0.000391807 | 0.007686518 | 0.094811479 |
| MAX | 0.615458597 | 6.148455556 | 4.180417837 | 0.00039303 | 0.007690114 | 0.091863481 |
| DPY19L1 | 1.079956504 | 3.635599838 | 4.180179201 | 0.000393259 | 0.007690114 | 0.091313972 |
| CNFN | 1.825207215 | 3.115223783 | 4.179118125 | 0.000394276 | 0.007701728 | 0.088870652 |
| TNFRSF12A | 2.010920928 | 4.614197362 | 4.178368831 | 0.000394996 | 0.007705171 | 0.087145292 |
| DIPK1C | -3.016892029 | #NAME? | -4.82225213 | 0.000554889 | 0.009408593 | 0.085953615 |
| CNOT1 | 1.027106507 | 5.014823193 | 4.177274825 | 0.00039605 | 0.007705171 | 0.084626214 |
| MARCO | 4.666092808 | #NAME? | 4.204730502 | 0.00040345 | 0.007813774 | 0.084594155 |
| ABHD4 | 0.865496011 | 4.399527242 | 4.177216771 | 0.000396106 | 0.007705171 | 0.084492539 |
| TOR1B | 0.631658465 | 4.537257982 | 4.17673505 | 0.000396571 | 0.007705171 | 0.083383337 |
| CAPN12 | -1.389784617 | 2.195849301 | -4.167620627 | 0.000405471 | 0.007844567 | 0.062398206 |
| PIGV | 0.638311398 | 3.506857311 | 4.165162289 | 0.000407905 | 0.007877073 | 0.056738639 |
| TSPAN17 | 0.733139296 | 5.548088171 | 4.165049513 | 0.000408017 | 0.007877073 | 0.056479013 |
| ABI2 | 0.805906724 | 4.559163739 | 4.162094014 | 0.000410964 | 0.007921561 | 0.049675204 |
| UBE2T | 1.92504476 | 4.244736798 | 4.161865483 | 0.000411193 | 0.007921561 | 0.049149119 |
| ERO1A | 1.264091999 | 5.252443763 | 4.160120615 | 0.000412944 | 0.007946869 | 0.045132459 |
| TMEM234 | 1.067822895 | 4.58896184 | 4.157794186 | 0.000415289 | 0.007983563 | 0.039777236 |
| DUSP11 | 0.698985078 | 5.183684799 | 4.156722898 | 0.000416374 | 0.007987527 | 0.037311304 |
| MBOAT1 | 1.003974419 | 4.907956046 | 4.153904616 | 0.000419241 | 0.00803405 | 0.030824286 |
| MARCHF5 | 0.758253725 | 4.867539979 | 4.152528948 | 0.000420647 | 0.008049227 | 0.027657939 |
| DLD | 0.924904619 | 5.685009545 | 4.151520905 | 0.000421681 | 0.008049227 | 0.025337795 |
| HK2 | 1.690817374 | 4.64800871 | 4.151359609 | 0.000421847 | 0.008049227 | 0.024966555 |
| KCNAB1 | -1.183718803 | 0.937663887 | -4.15134848 | 0.000421858 | 0.008049227 | 0.02494094 |
| CCT2 | 0.823050025 | 6.945430234 | 4.15097111 | 0.000422246 | 0.008049227 | 0.024072387 |
| OR8D4 | 1.69745912 | #NAME? | 4.177045803 | 0.000430976 | 0.008111808 | 0.022132112 |
| PTGFRN | 1.255592985 | 4.923245072 | 4.148123769 | 0.000425183 | 0.008080187 | 0.01751914 |
| VKORC1L1 | 0.711344815 | 3.844180312 | 4.14772228 | 0.000425599 | 0.008080187 | 0.016595128 |
| BCL2L13 | 0.719134555 | 4.928047308 | 4.147675778 | 0.000425647 | 0.008080187 | 0.016488104 |
| SOX10 | -5.053714894 | 0.728880835 | -4.145565582 | 0.00042784 | 0.008094565 | 0.011631673 |
| ZFYVE16 | 0.832234564 | 4.209888568 | 4.1453125 | 0.000428103 | 0.008094565 | 0.011049239 |
| GPR87 | 1.966192029 | 4.519560063 | 4.145136431 | 0.000428287 | 0.008094565 | 0.010644042 |
| PDCD10 | 0.640210584 | 5.89463238 | 4.144819216 | 0.000428618 | 0.008094565 | 0.00991402 |
| CES5A | -3.07862804 | #NAME? | -5.368129284 | 0.000714299 | 0.010756493 | 0.009548188 |
| CACNG4 | 4.133632259 | -0.21224689 | 4.142618448 | 0.00043092 | 0.008111808 | 0.004849407 |
| TMEM117 | 0.705621394 | 2.610586072 | 4.142237308 | 0.00043132 | 0.008111808 | 0.003972312 |
| SLAIN2 | 0.95916474 | 4.457388071 | 4.142230658 | 0.000431327 | 0.008111808 | 0.00395701 |
| PPP2CA | 0.669779193 | 5.780366214 | 4.139382808 | 0.000434328 | 0.008144611 | -0.002596383 |
| MARK2 | 0.930508405 | 4.339521498 | 4.139362775 | 0.000434349 | 0.008144611 | -0.002642481 |
| FAM3D | -1.745589534 | 7.402207964 | -4.139214912 | 0.000434506 | 0.008144611 | -0.00298273 |
| SH3BP2 | 0.944424148 | 3.956067244 | 4.138460856 | 0.000435304 | 0.008144611 | -0.00471788 |
| EDA2R | 1.52624301 | 1.11752822 | 4.138032052 | 0.000435759 | 0.008144611 | -0.005704586 |
| EIPR1 | 0.890944878 | 5.659512137 | 4.137548855 | 0.000436272 | 0.008145826 | -0.006816445 |
| CNIH2 | 2.353960755 | 2.155163597 | 4.135419214 | 0.000438539 | 0.008179768 | -0.011716726 |
| RPS6KA1 | 0.688891035 | 5.692764621 | 4.133338301 | 0.000440766 | 0.008212886 | -0.0165047 |
| CNTN2 | -3.324207428 | #NAME? | -4.469057167 | 0.000543222 | 0.009284806 | -0.019245515 |
| RPL36A-HNRNPH2 | 0.607540129 | 6.245445165 | 4.131997293 | 0.000442208 | 0.008231307 | -0.019590128 |
| TBC1D19 | 1.087373217 | 2.614109139 | 4.129615044 | 0.000444779 | 0.008270714 | -0.025071077 |
| SH2D4A | 0.914640588 | 4.554614254 | 4.125098356 | 0.000449697 | 0.008353607 | -0.035462149 |
| HAS3 | 2.642066597 | 4.676475842 | 4.12393114 | 0.000450976 | 0.008358878 | -0.038147295 |
| KHDRBS1 | 0.67385208 | 6.650387143 | 4.123600073 | 0.00045134 | 0.008358878 | -0.038908895 |
| CYTH2 | 0.738450986 | 6.400248136 | 4.123241465 | 0.000451734 | 0.008358878 | -0.039733843 |
| TM2D1 | 0.629235361 | 5.798434853 | 4.122746367 | 0.000452278 | 0.008358878 | -0.040872768 |
| ETF1 | 0.771769493 | 6.058693203 | 4.121528127 | 0.000453622 | 0.008371448 | -0.043675165 |
| RNF7 | 0.63149433 | 5.789714035 | 4.121294831 | 0.000453879 | 0.008371448 | -0.044211823 |
| GATA4 | -2.914664287 | #NAME? | -7.770422445 | 0.000646844 | 0.010173012 | -0.052564547 |
| TMCC1 | 0.719843555 | 3.087070663 | 4.115364328 | 0.000460478 | 0.008462009 | -0.057853123 |
| CTDP1 | 0.656994559 | 4.490725564 | 4.114840647 | 0.000461066 | 0.008462009 | -0.059057612 |
| SMAD1 | 0.986582038 | 5.028073056 | 4.114796131 | 0.000461116 | 0.008462009 | -0.05916 |
| UBE2F | 0.590088053 | 5.068228795 | 4.113957576 | 0.000462058 | 0.00847075 | -0.061088688 |
| CHST1 | -1.623447602 | 1.378749657 | -4.110319847 | 0.000466167 | 0.008531153 | -0.069455135 |
| ATP2C1 | 1.096370086 | 5.874052187 | 4.110210591 | 0.000466291 | 0.008531153 | -0.069706404 |
| SLITRK5 | -3.483343032 | -1.969499337 | -4.109384961 | 0.000467229 | 0.008538887 | -0.071605188 |
| KLF15 | -1.85044795 | 1.952888524 | -4.109012409 | 0.000467653 | 0.008538887 | -0.072461973 |
| NEURL3 | -2.143754144 | 3.391930383 | -4.108031581 | 0.00046877 | 0.008547154 | -0.074717624 |
| MFAP1 | 0.626513925 | 5.557293601 | 4.107790551 | 0.000469045 | 0.008547154 | -0.075271925 |
| STYXL1 | 0.981872959 | 6.082296213 | 4.10634359 | 0.0004707 | 0.008567197 | -0.078599461 |
| MDH1 | 0.68167398 | 7.931471523 | 4.104219749 | 0.000473139 | 0.008595916 | -0.083483421 |
| SEMA3F | 1.37782876 | 5.788122254 | 4.103389343 | 0.000474096 | 0.008604709 | -0.085392956 |
| PIGO | 0.712705952 | 4.403062017 | 4.10293576 | 0.00047462 | 0.008605625 | -0.086435963 |
| LOC112268052 | 1.93920788 | -0.345630841 | 4.100024688 | 0.000477994 | 0.008658175 | -0.093129704 |
| SLC5A7 | 4.381909153 | #NAME? | 4.502392019 | 0.000611554 | 0.009859684 | -0.094575121 |
| HMOX1 | 1.741731597 | 4.503508232 | 4.097845064 | 0.000480537 | 0.008680353 | -0.098141281 |
| PDCD6IP | 0.898439396 | 5.697299444 | 4.097429282 | 0.000481023 | 0.008680353 | -0.099097255 |
| ANXA2 | 1.135200522 | 11.04505135 | 4.097019833 | 0.000481503 | 0.008680353 | -0.100038662 |
| CLEC10A | 1.961837982 | 4.209464659 | 4.096774604 | 0.00048179 | 0.008680353 | -0.10060249 |
| CXXC5 | 0.755465953 | 5.672305581 | 4.096415734 | 0.000482211 | 0.008680353 | -0.101427592 |
| MMP1 | 2.814058457 | 4.133569319 | 4.096118334 | 0.00048256 | 0.008680353 | -0.102111361 |
| TMEM45B | 1.892852101 | 4.951017302 | 4.095102601 | 0.000483754 | 0.008693237 | -0.104446656 |
| IGFN1 | -4.037701886 | #NAME? | -4.358199272 | 0.000574584 | 0.009570746 | -0.106316933 |
| RALA | 0.811575383 | 4.892932686 | 4.093771937 | 0.000485323 | 0.008696911 | -0.107505942 |
| DCUN1D5 | 0.734634382 | 3.785036839 | 4.093644422 | 0.000485474 | 0.008696911 | -0.107799103 |
| GPX8 | 1.208483815 | 4.411095634 | 4.093548265 | 0.000485587 | 0.008696911 | -0.108020168 |
| CTBP2 | 0.820709837 | 5.983041961 | 4.093307883 | 0.000485872 | 0.008696911 | -0.108572812 |
| RAB10 | 0.848475397 | 6.075986143 | 4.091631518 | 0.000487858 | 0.008704162 | -0.112426723 |
| PGS1 | 0.640269099 | 4.814829455 | 4.091425777 | 0.000488102 | 0.008704162 | -0.112899706 |
| RARA | 0.636410462 | 4.347019419 | 4.091350626 | 0.000488191 | 0.008704162 | -0.113072471 |
| ABCC1 | 1.029738997 | 4.970430453 | 4.090917073 | 0.000488707 | 0.008704816 | -0.114069167 |
| PRR15 | 2.114225774 | 6.580137811 | 4.089531976 | 0.000490356 | 0.008719943 | -0.117253308 |
| SLC30A10 | -1.361375679 | -1.132174247 | -4.089182205 | 0.000490774 | 0.008719943 | -0.118057367 |
| FNDC10 | 1.554306124 | 2.121759915 | 4.088988406 | 0.000491005 | 0.008719943 | -0.118502872 |
| OSR1 | -1.868355323 | 2.012897434 | -4.088596652 | 0.000491474 | 0.008719943 | -0.119403432 |
| ATP6AP2 | 0.699644848 | 6.946247258 | 4.086688865 | 0.000493761 | 0.008751978 | -0.123788917 |
| TRAF3 | 0.968786815 | 3.718321214 | 4.085465686 | 0.000495232 | 0.008767489 | -0.126600577 |
| CTTNBP2NL | 1.252785614 | 3.508324674 | 4.085160747 | 0.0004956 | 0.008767489 | -0.127301514 |
| CCDC43 | 0.607626645 | 4.392560805 | 4.084682126 | 0.000496177 | 0.008769175 | -0.128401668 |
| SEL1L3 | 1.260243354 | 5.920335153 | 4.084031352 | 0.000496964 | 0.008774545 | -0.129897514 |
| SLC43A1 | -1.548063238 | 1.972237968 | -4.083277501 | 0.000497876 | 0.008782128 | -0.131630262 |
| JPT1 | 1.377680943 | 6.735684198 | 4.079526313 | 0.000502441 | 0.008854061 | -0.14025204 |
| MAGEA8 | 3.011672844 | #NAME? | 5.901471917 | 0.000648165 | 0.010173012 | -0.144423341 |
| NGEF | 2.056848391 | 2.927161287 | 4.077605846 | 0.000504794 | 0.008886917 | -0.144665789 |
| TNFAIP8 | 1.110826574 | 5.925085639 | 4.074287715 | 0.000508886 | 0.008926162 | -0.15229129 |
| KCTD11 | 1.387419981 | 4.666049892 | 4.073910242 | 0.000509353 | 0.008926162 | -0.153158736 |
| MTF1 | 0.961780767 | 2.967726089 | 4.073771591 | 0.000509525 | 0.008926162 | -0.153477359 |
| LPAR2 | 0.585135746 | 4.49512491 | 4.073633113 | 0.000509697 | 0.008926162 | -0.153795585 |
| SPATA5L1 | 0.717116676 | 3.264608214 | 4.073414257 | 0.000509968 | 0.008926162 | -0.154298516 |
| PTGES3 | 0.836745227 | 8.414617197 | 4.072675964 | 0.000510885 | 0.008933611 | -0.155995099 |
| TRIM16 | 1.399823064 | 5.253788503 | 4.070052156 | 0.000514157 | 0.008982182 | -0.162024328 |
| B4GALNT3 | 1.367530222 | 4.580506469 | 4.066079758 | 0.000519149 | 0.009060701 | -0.171151776 |
| HPS3 | 0.621735669 | 4.45319482 | 4.064840609 | 0.000520717 | 0.009079341 | -0.173998817 |
| SNX33 | 0.618354697 | 4.320047274 | 4.063995311 | 0.000521788 | 0.009085037 | -0.175940906 |
| TRPV4 | 1.039263832 | 5.550641593 | 4.06379529 | 0.000522042 | 0.009085037 | -0.176400456 |
| TAX1BP3 | 1.067441901 | 7.363646877 | 4.063283442 | 0.000522693 | 0.00908766 | -0.177576412 |
| CENPK | 2.125350363 | 3.39223492 | 4.062128694 | 0.000524163 | 0.009104519 | -0.180229366 |
| NKIRAS2 | 0.610689049 | 4.705840664 | 4.06161995 | 0.000524812 | 0.009107095 | -0.181398147 |
| SH3GL3 | 1.62315548 | -0.127274791 | 4.060687394 | 0.000526004 | 0.009119076 | -0.18354055 |
| CNOT6 | 0.942922951 | 3.816237188 | 4.059306344 | 0.000527774 | 0.009126477 | -0.186713212 |
| PTPRU | 1.00897768 | 5.369599868 | 4.059179845 | 0.000527937 | 0.009126477 | -0.187003809 |
| KLK10 | 2.144804249 | 4.40186846 | 4.058631102 | 0.000528642 | 0.009129988 | -0.188264395 |
| DDX25 | -1.863835403 | -0.888867157 | -4.056573187 | 0.000531295 | 0.009167099 | -0.192991739 |
| H3-3B | 0.641399359 | 8.955103494 | 4.05611871 | 0.000531882 | 0.00916854 | -0.19403571 |
| IRF5 | 1.035258676 | 3.002906863 | 4.055120309 | 0.000533175 | 0.009182129 | -0.196329078 |
| AQP8 | -1.926903184 | #NAME? | -4.106773538 | 0.000555306 | 0.009408593 | -0.198923839 |
| TMEM74B | -1.445074734 | 2.623428956 | -4.052626207 | 0.00053642 | 0.009226313 | -0.202057896 |
| ABCB8 | 0.645839642 | 3.604926166 | 4.051554418 | 0.00053782 | 0.009235876 | -0.204519629 |
| NUP62 | 0.649184555 | 5.225060208 | 4.050237402 | 0.000539545 | 0.009256767 | -0.207544525 |
| RAB11FIP1 | 0.992228762 | 5.229088783 | 4.04957109 | 0.000540421 | 0.009263042 | -0.20907486 |
| XRCC5 | 0.718534698 | 7.231593572 | 4.048604085 | 0.000541693 | 0.00927611 | -0.21129576 |
| MAT2B | 0.724799638 | 6.650177641 | 4.047733226 | 0.000542842 | 0.009284806 | -0.213295797 |
| AKAP10 | 0.745132261 | 3.923087867 | 4.046485182 | 0.000544492 | 0.009294397 | -0.216162014 |
| MORF4L1 | 0.60820228 | 8.156518988 | 4.046248583 | 0.000544805 | 0.009294397 | -0.216705369 |
| C2orf42 | 0.597696704 | 3.565838502 | 4.043880904 | 0.000547951 | 0.009339309 | -0.222142626 |
| ARFIP1 | 0.763308883 | 5.155816736 | 4.043030423 | 0.000549086 | 0.009341137 | -0.224095635 |
| STARD3NL | 0.643400345 | 5.197533717 | 4.041516388 | 0.000551111 | 0.009366833 | -0.227572301 |
| FREM3 | -3.380016926 | #NAME? | -4.422757705 | 0.000707029 | 0.010693161 | -0.232746099 |
| LDHA | 1.400778821 | 8.607720794 | 4.038253701 | 0.000555501 | 0.009408593 | -0.235063929 |
| C17orf100 | 0.966049565 | 2.504591291 | 4.03815281 | 0.000555638 | 0.009408593 | -0.235295581 |
| POLD3 | 0.867105059 | 4.094861753 | 4.037692411 | 0.00055626 | 0.00941037 | -0.236352677 |
| CTNS | 0.843611982 | 4.037345614 | 4.036144532 | 0.000558358 | 0.009430312 | -0.239906576 |
| TTI1 | 0.881772259 | 3.153277436 | 4.036057514 | 0.000558476 | 0.009430312 | -0.240106365 |
| CDK1 | 2.112096956 | 4.670366823 | 4.035436633 | 0.00055932 | 0.0094358 | -0.241531853 |
| MSH3 | 1.285708274 | 3.893507493 | 4.034725554 | 0.000560288 | 0.00944337 | -0.243164401 |
| LOC112268347 | 2.401628804 | -2.300603915 | 4.031881047 | 0.000564177 | 0.009491321 | -0.249694734 |
| LOC107987432 | 2.401628804 | -2.300603915 | 4.031881047 | 0.000564177 | 0.009491321 | -0.249694734 |
| CYCS | 0.863586456 | 5.471622791 | 4.031433166 | 0.000564792 | 0.009492882 | -0.250722922 |
| HP | -6.457320832 | #NAME? | -4.055272324 | 0.000576115 | 0.009581946 | -0.252372447 |
| AHCYL1 | 0.690473413 | 5.994808844 | 4.027831137 | 0.00056976 | 0.009551828 | -0.258991569 |
| IKBKE | 1.16776784 | 3.795927303 | 4.027646527 | 0.000570016 | 0.009551828 | -0.25941533 |
| PPP4R1 | 1.162320443 | 6.219384713 | 4.027574167 | 0.000570116 | 0.009551828 | -0.259581427 |
| CCBE1 | -1.52901701 | 0.461221998 | -4.02736971 | 0.000570399 | 0.009551828 | -0.260050743 |
| FAM78B | -1.198118914 | -0.081902389 | -4.026175649 | 0.000572058 | 0.009557375 | -0.262791569 |
| TMEM53 | 0.6523716 | 3.700524065 | 4.02567717 | 0.000572752 | 0.009557375 | -0.263935743 |
| ACTB | 0.789473549 | 11.35557049 | 4.025618824 | 0.000572833 | 0.009557375 | -0.264069665 |
| GPN1 | 0.588440157 | 4.962921881 | 4.024289862 | 0.000574687 | 0.009570746 | -0.267119994 |
| HSPA9 | 0.889997012 | 6.566455188 | 4.022873859 | 0.000576669 | 0.009581946 | -0.27036999 |
| HRC | -1.653601991 | 0.125614956 | -4.022680416 | 0.00057694 | 0.009581946 | -0.27081397 |
| PRRC2A | 0.89348811 | 5.210812281 | 4.020874081 | 0.000579479 | 0.009614104 | -0.274959653 |
| KTN1 | 0.840137381 | 6.539812925 | 4.020551734 | 0.000579934 | 0.009614104 | -0.275699446 |
| AZIN1 | 1.205614856 | 6.444094663 | 4.018789951 | 0.000582423 | 0.009630818 | -0.279742653 |
| PTBP3 | 0.696604164 | 5.001952883 | 4.018713946 | 0.000582531 | 0.009630818 | -0.279917075 |
| UBE2N | 0.826640247 | 4.898328979 | 4.016302892 | 0.000585955 | 0.009678636 | -0.285450009 |
| STRA8 | 2.489324268 | -1.463066184 | 4.015817559 | 0.000586647 | 0.009681269 | -0.286563719 |
| RAB6A | 0.753651402 | 6.262864043 | 4.014617841 | 0.00058836 | 0.009695442 | -0.289316685 |
| H2BC8 | 2.428206848 | 1.641598902 | 4.014469921 | 0.000588572 | 0.009695442 | -0.28965611 |
| ANP32A | 0.653339556 | 6.403296247 | 4.013242719 | 0.00059033 | 0.009713298 | -0.292472039 |
| FAM107A | -1.503180677 | 6.273723735 | -4.012968483 | 0.000590724 | 0.009713298 | -0.293101286 |
| EPO | -1.907945724 | #NAME? | -4.063569619 | 0.000614135 | 0.009883769 | -0.294206801 |
| SPOCD1 | 2.225023937 | 1.073312345 | 4.012044364 | 0.000592053 | 0.009726349 | -0.295221687 |
| ABHD17B | 0.818994394 | 4.7512208 | 4.010195768 | 0.000594719 | 0.009742831 | -0.299463149 |
| AHR | 1.333717328 | 4.938906943 | 4.009912094 | 0.000595129 | 0.009742831 | -0.300113999 |
| SNX6 | 0.706791297 | 5.750626827 | 4.009864045 | 0.000595199 | 0.009742831 | -0.300224241 |
| H4C11 | 1.689443859 | #NAME? | 4.229663776 | 0.000743106 | 0.011004991 | -0.301501711 |
| NCOA6 | 0.683708539 | 3.937874842 | 4.007713321 | 0.000598319 | 0.009770157 | -0.305158598 |
| CAMSAP1 | 1.070835375 | 3.706875689 | 4.007406513 | 0.000598765 | 0.009770157 | -0.305862479 |
| SERBP1 | 0.806711542 | 6.403325796 | 4.007258417 | 0.000598981 | 0.009770157 | -0.306202237 |
| MGST1 | 1.74116335 | 7.817526139 | 4.007233315 | 0.000599017 | 0.009770157 | -0.306259827 |
| MZT1 | 0.840659467 | 4.073343816 | 4.006420973 | 0.000600201 | 0.009772956 | -0.308123463 |
| EFL1 | 0.668547436 | 3.951738844 | 4.006021413 | 0.000600784 | 0.009772956 | -0.3090401 |
| NACC2 | 0.777408863 | 3.304311139 | 4.005207121 | 0.000601975 | 0.009774562 | -0.31090815 |
| CAPZA1 | 0.996046129 | 6.875540236 | 4.004728968 | 0.000602675 | 0.009777199 | -0.312005049 |
| BPIFB2 | -5.541316826 | 3.533574154 | -4.003399135 | 0.000604626 | 0.009800111 | -0.315055659 |
| NCOA4 | 0.936190832 | 7.280922709 | 4.002256056 | 0.000606308 | 0.00981199 | -0.317677767 |
| TRIM8 | 0.69310003 | 6.752293263 | 4.00181752 | 0.000606955 | 0.00981199 | -0.318683704 |
| CYP2F1 | 2.857081166 | 6.067618554 | 4.001802091 | 0.000606977 | 0.00981199 | -0.318719094 |
| CELSR2 | 1.361691409 | 2.565058611 | 4.001055026 | 0.00060808 | 0.009821093 | -0.32043272 |
| DEPTOR | -1.774841115 | 2.887866528 | -3.999812306 | 0.00060992 | 0.00984206 | -0.323283204 |
| CPPED1 | 0.938895675 | 3.705086687 | 3.997562102 | 0.000613265 | 0.009878503 | -0.328444348 |
| CR1 | 2.243047935 | 0.193468145 | 3.995165129 | 0.000616847 | 0.009913129 | -0.333941769 |
| NPIPB15 | -0.89000237 | 6.084585935 | -3.993282365 | 0.000619676 | 0.009946544 | -0.338259594 |
| PPP2R5E | 0.707235717 | 3.609206628 | 3.992607619 | 0.000620693 | 0.009954082 | -0.339806962 |
| SLC7A3 | -3.448233753 | #NAME? | -4.01615499 | 0.000632389 | 0.010061792 | -0.340438728 |
| ADGRG6 | -2.12954996 | 1.938810088 | -3.991217947 | 0.000622793 | 0.009978955 | -0.34299375 |
| PRSS22 | 1.123861962 | 6.07922818 | 3.990522539 | 0.000623846 | 0.0099853 | -0.344588407 |
| TMEM69 | 0.847940645 | 4.962767821 | 3.989648593 | 0.000625173 | 0.0099853 | -0.346592427 |
| CD300LB | 1.673638249 | 0.18423852 | 3.989588232 | 0.000625264 | 0.0099853 | -0.346730839 |
| TMEM154 | 1.166797192 | 2.532553821 | 3.988062789 | 0.000627586 | 0.010011655 | -0.350228663 |
| METTL2A | 0.628614322 | 3.516484427 | 3.986766311 | 0.000629567 | 0.010033623 | -0.353201351 |
| ZUP1 | 0.601798957 | 3.551826042 | 3.986439443 | 0.000630067 | 0.010033623 | -0.353950809 |
| CBFA2T3 | 1.216271814 | 2.128503296 | 3.984270594 | 0.000633396 | 0.010069006 | -0.358923456 |
| KCNJ15 | 2.286561272 | 3.96775774 | 3.983422565 | 0.000634703 | 0.010073239 | -0.360867695 |
| UTP14A | 0.698710009 | 4.065663332 | 3.983378741 | 0.00063477 | 0.010073239 | -0.360968168 |
| TRIP12 | 0.652969706 | 5.211149352 | 3.981903117 | 0.00063705 | 0.010091809 | -0.36435115 |
| ENTPD7 | 0.919119368 | 2.169954503 | 3.979894385 | 0.000640167 | 0.010124544 | -0.368956087 |
| RTN4R | 2.2868164 | 1.497083914 | 3.979853839 | 0.00064023 | 0.010124544 | -0.369049034 |
| NTN1 | 1.770881775 | 5.506495242 | 3.979146487 | 0.000641331 | 0.010133147 | -0.370670544 |
| EYA4 | 1.388192785 | 3.415844387 | 3.978063429 | 0.000643021 | 0.010151028 | -0.373153241 |
| SAMD8 | 0.766535993 | 3.673178104 | 3.975533659 | 0.000646986 | 0.010173012 | -0.378951932 |
| ASPRV1 | -1.027583623 | 1.468218038 | -3.975253014 | 0.000647427 | 0.010173012 | -0.379595195 |
| TRIQK | 0.856785449 | 3.930657368 | 3.974916353 | 0.000647957 | 0.010173012 | -0.380366844 |
| SLC22A9 | -3.121662644 | -1.228862033 | -3.974547682 | 0.000648537 | 0.010173012 | -0.381211852 |
| PRMT6 | 0.93669193 | 3.709068941 | 3.973200376 | 0.000650663 | 0.010173012 | -0.384299851 |
| RNF11 | 0.605893388 | 5.82237118 | 3.972695758 | 0.000651462 | 0.010173012 | -0.385456395 |
| PNPLA7 | -1.396663083 | 3.424444737 | -3.972480123 | 0.000651803 | 0.010173012 | -0.385950608 |
| AGGF1 | 0.775655801 | 4.116510611 | 3.972474098 | 0.000651812 | 0.010173012 | -0.385964417 |
| BPGM | 0.843200671 | 4.552954343 | 3.972039936 | 0.0006525 | 0.010173012 | -0.386959458 |
| MGAM2 | -4.80918704 | -0.432014608 | -3.971908531 | 0.000652709 | 0.010173012 | -0.387260619 |
| NADSYN1 | 0.605600678 | 5.807234248 | 3.971847999 | 0.000652805 | 0.010173012 | -0.38739935 |
| STX3 | 0.792520444 | 4.679673704 | 3.971070065 | 0.000654039 | 0.01017688 | -0.38918223 |
| ATPAF1 | 0.602950649 | 5.590988487 | 3.969268498 | 0.000656908 | 0.010201991 | -0.393310927 |
| NBEAL1 | 0.935004976 | 1.979521368 | 3.966813801 | 0.000660837 | 0.010245507 | -0.398936054 |
| TPBG | 0.749206305 | 5.539669243 | 3.965650989 | 0.000662706 | 0.010264031 | -0.401600582 |
| GSPT1 | 0.756463497 | 5.073859164 | 3.965368815 | 0.00066316 | 0.010264031 | -0.402247155 |
| DARS1 | 0.734705431 | 5.673162579 | 3.962376278 | 0.000667998 | 0.010321343 | -0.409103911 |
| PPP2R2A | 0.784884744 | 5.761554288 | 3.961486897 | 0.000669443 | 0.010334882 | -0.411141615 |
| UBE2W | 0.776821649 | 3.029415778 | 3.959523874 | 0.000672643 | 0.010375468 | -0.415638995 |
| H4C14 | 1.654321054 | 4.139263712 | 3.959126088 | 0.000673293 | 0.010376696 | -0.416550309 |
| EPS8 | 1.132839294 | 5.058835525 | 3.957413558 | 0.000676099 | 0.010411122 | -0.420473523 |
| SKA2 | 1.175220142 | 4.343980649 | 3.956001323 | 0.000678422 | 0.010438054 | -0.423708638 |
| LYPLA2 | 0.597960741 | 6.369949234 | 3.952476857 | 0.000684254 | 0.010509998 | -0.431781779 |
| CDKN2C | 1.225397589 | 5.381522813 | 3.950710866 | 0.000687195 | 0.010525031 | -0.43582662 |
| LCLAT1 | 0.815348571 | 2.79875555 | 3.950412297 | 0.000687693 | 0.010525031 | -0.436510443 |
| ATP6V1H | 0.601315991 | 5.958116219 | 3.950371275 | 0.000687761 | 0.010525031 | -0.436604397 |
| C3AR1 | 1.831775528 | 2.139924511 | 3.950152967 | 0.000688126 | 0.010525031 | -0.43710439 |
| GRIN2A | -3.188051704 | #NAME? | -3.998622197 | 0.000714497 | 0.010756493 | -0.437357435 |
| TSPAN1 | 2.055556976 | 10.04508021 | 3.947997627 | 0.000691737 | 0.010562496 | -0.442040604 |
| CCT8L2 | -1.678433705 | #NAME? | -4.643580902 | 0.000954035 | 0.012710675 | -0.444181111 |
| EDDM3A | -1.748124853 | #NAME? | -4.593196957 | 0.001029604 | 0.013360379 | -0.448414759 |
| PI16 | -4.057786439 | -0.97187003 | -3.943588316 | 0.000699183 | 0.010646606 | -0.452137858 |
| NAGA | 0.865918975 | 5.08041971 | 3.943350379 | 0.000699587 | 0.010646606 | -0.45268269 |
| PYGM | -1.990588906 | 0.048859863 | -3.941605649 | 0.000702557 | 0.010673905 | -0.456677671 |
| RC3H2 | 0.749032707 | 3.560425543 | 3.941263021 | 0.000703142 | 0.010673905 | -0.457462173 |
| RCOR1 | 0.843470471 | 3.730842555 | 3.940699642 | 0.000704104 | 0.010677731 | -0.458752101 |
| NEK2 | 2.013602387 | 3.422946435 | 3.940427649 | 0.000704569 | 0.010677731 | -0.459374857 |
| ATP6V1A | 0.76053336 | 5.077613545 | 3.940085329 | 0.000705155 | 0.010677731 | -0.460158625 |
| SRSF3 | 0.724975745 | 7.075195468 | 3.938805227 | 0.00070735 | 0.010693161 | -0.463089438 |
| CUL4B | 0.751530946 | 5.047808302 | 3.937854014 | 0.000708986 | 0.010704376 | -0.465267175 |
| GABRP | 2.206287493 | 7.757257842 | 3.937689279 | 0.000709269 | 0.010704376 | -0.465644318 |
| CORIN | -2.684645891 | -0.198725624 | -3.935065344 | 0.000713802 | 0.010756493 | -0.471651254 |
| VSIG10L | -1.471788332 | 0.041315044 | -3.930200174 | 0.000722283 | 0.010859422 | -0.482787644 |
| ARHGEF37 | -0.914830973 | 4.305314626 | -3.929766622 | 0.000723043 | 0.010859422 | -0.483779958 |
| LRAT | -1.463585689 | -0.546840764 | -3.92971968 | 0.000723125 | 0.010859422 | -0.483887399 |
| FRZB | -1.870834734 | 4.553187284 | -3.92806426 | 0.000726037 | 0.01088517 | -0.487676192 |
| UBA1 | 0.610113819 | 7.40121008 | 3.927713853 | 0.000726655 | 0.010885458 | -0.488478146 |
| IKZF2 | 1.222928754 | 2.862672279 | 3.925526661 | 0.000730523 | 0.010897091 | -0.493483634 |
| N4BP1 | 0.911732419 | 3.800476193 | 3.92542373 | 0.000730706 | 0.010897091 | -0.493719188 |
| ATP2B4 | 0.93749281 | 4.661007082 | 3.925242702 | 0.000731027 | 0.010897091 | -0.494133459 |
| SLC6A8 | 1.865949848 | 6.9026379 | 3.924886148 | 0.00073166 | 0.010897593 | -0.494949407 |
| LGI4 | -1.962312333 | 1.402529383 | -3.92396758 | 0.000733293 | 0.010912979 | -0.497051436 |
| CORO1C | 1.011886454 | 5.544240928 | 3.923564449 | 0.000734011 | 0.01091473 | -0.49797393 |
| PJA1 | 0.644792783 | 4.960556751 | 3.922528291 | 0.000735859 | 0.010933275 | -0.500344939 |
| CAPZB | 0.730690816 | 7.950102219 | 3.919650392 | 0.000741017 | 0.01099621 | -0.506929911 |
| WNT9A | 1.54465295 | 3.346743824 | 3.91937976 | 0.000741503 | 0.01099621 | -0.507549115 |
| CELF1 | 0.604047663 | 5.378578523 | 3.919154701 | 0.000741909 | 0.01099621 | -0.508064046 |
| COLGALT2 | -2.546166881 | 0.551741042 | -3.917578857 | 0.000744751 | 0.011020381 | -0.511669428 |
| LRRC8B | 1.009167582 | 3.243600121 | 3.913925543 | 0.000751384 | 0.011105115 | -0.520027115 |
| PVR | 1.087762688 | 2.995614564 | 3.91375261 | 0.000751699 | 0.011105115 | -0.520422707 |
| ABHD2 | 1.457114248 | 5.201709935 | 3.912735374 | 0.000753557 | 0.011123526 | -0.522749639 |
| GPR153 | 1.308405815 | 2.11951166 | 3.911444498 | 0.000755921 | 0.011149374 | -0.525702402 |
| GBE1 | 0.837938857 | 4.401369584 | 3.910852405 | 0.000757008 | 0.011156356 | -0.527056718 |
| CLDN1 | 1.923096334 | 6.456045555 | 3.909766336 | 0.000759005 | 0.011176739 | -0.529540851 |
| NAP1L4 | 0.659788693 | 6.975104097 | 3.909071547 | 0.000760286 | 0.011186539 | -0.531129972 |
| TCF20 | 0.926500789 | 3.817417416 | 3.907519118 | 0.000763155 | 0.011206644 | -0.534680546 |
| PTPN2 | 0.633159922 | 5.899750446 | 3.90711616 | 0.000763902 | 0.011206644 | -0.535602123 |
| UBE2A | 0.595022806 | 6.095828004 | 3.907047241 | 0.00076403 | 0.011206644 | -0.535759743 |
| GALNS | 1.249619506 | 4.689587515 | 3.906999882 | 0.000764117 | 0.011206644 | -0.535868053 |
| MRPL30 | 0.61512708 | 4.237147698 | 3.906248518 | 0.000765512 | 0.011212365 | -0.537586404 |
| SHOC1 | 1.524690662 | -0.979858173 | 3.906047249 | 0.000765886 | 0.011212365 | -0.538046693 |
| PRAG1 | 1.172863164 | 2.523668839 | 3.903836666 | 0.000770004 | 0.01124763 | -0.543101942 |
| HNRNPA1L2 | 0.883801269 | 8.56129969 | 3.899373279 | 0.000778388 | 0.011360961 | -0.553307791 |
| H4C15 | 1.635835643 | 4.846491264 | 3.897805068 | 0.000781355 | 0.011395119 | -0.55689323 |
| TBC1D2 | 1.168312739 | 5.07498597 | 3.897100925 | 0.00078269 | 0.011405454 | -0.558503064 |
| YEATS2 | 0.657523409 | 4.121974391 | 3.896428903 | 0.000783967 | 0.011408443 | -0.560039424 |
| TPST1 | 1.137850746 | 4.616058958 | 3.896332784 | 0.00078415 | 0.011408443 | -0.560259167 |
| GTF2H2 | 1.668626236 | 3.222375624 | 3.894586534 | 0.000787479 | 0.011433735 | -0.564251213 |
| PRRC2B | 0.710900873 | 5.379935129 | 3.894498009 | 0.000787648 | 0.011433735 | -0.564453581 |
| ADAMTS14 | 2.256239619 | 1.318540173 | 3.893945074 | 0.000788705 | 0.011433735 | -0.565717571 |
| SAMD12 | 1.04491261 | 2.370104521 | 3.893774188 | 0.000789032 | 0.011433735 | -0.566108206 |
| BTBD10 | 0.8101816 | 4.797116068 | 3.892712387 | 0.000791067 | 0.011454094 | -0.568535361 |
| SYT3 | 1.695904596 | #NAME? | 3.91386082 | 0.000806777 | 0.011598449 | -0.570377638 |
| STK35 | 0.902904486 | 3.375756888 | 3.891453039 | 0.000793487 | 0.011479995 | -0.571413966 |
| MRPS10 | 0.638010938 | 5.137486483 | 3.890295152 | 0.000795719 | 0.01149914 | -0.574060538 |
| DHCR24 | 1.193845835 | 7.299337282 | 3.890110602 | 0.000796075 | 0.01149914 | -0.574482352 |
| DOC2A | 3.249821355 | 2.201197936 | 3.888512959 | 0.000799166 | 0.011533827 | -0.578133859 |
| CPA3 | 3.345355602 | 5.737158686 | 3.888214311 | 0.000799745 | 0.011533827 | -0.578816415 |
| MFAP3 | 0.987730892 | 3.416754252 | 3.88618501 | 0.00080369 | 0.011569863 | -0.583454145 |
| LSR | 0.609653868 | 6.549123514 | 3.8859483 | 0.000804152 | 0.011569863 | -0.583995095 |
| E2F7 | 2.67908661 | 0.727792807 | 3.884206423 | 0.000807556 | 0.011600487 | -0.587975644 |
| RAB11FIP4 | 1.115798843 | 3.194456497 | 3.883170414 | 0.000809588 | 0.011608364 | -0.590343016 |
| AAGAB | 0.589213294 | 5.022656337 | 3.882950532 | 0.000810019 | 0.011608364 | -0.590845453 |
| ENSA | 0.729355439 | 7.850193641 | 3.882435965 | 0.000811031 | 0.011613707 | -0.592021242 |
| DMBT1 | -7.204621288 | 4.134332185 | -3.881841808 | 0.0008122 | 0.011621302 | -0.593378864 |
| CSN2 | -2.285528691 | #NAME? | -6.498687007 | 0.001442108 | 0.016099561 | -0.596828415 |
| TPP1 | 0.914207137 | 5.410964436 | 3.87941375 | 0.000816997 | 0.011680739 | -0.598926564 |
| SERPINF1 | 1.411412232 | 8.854215841 | 3.879009521 | 0.000817798 | 0.011683009 | -0.59985011 |
| NIFK | 0.665744016 | 5.269570829 | 3.878678397 | 0.000818455 | 0.011683216 | -0.600606622 |
| ITFG1 | 0.63560965 | 5.291720086 | 3.877385821 | 0.000821024 | 0.011696211 | -0.603559654 |
| PDE6G | 2.026645651 | #NAME? | 3.864131275 | 0.000908068 | 0.012348572 | -0.604203084 |
| NFKB1 | 0.859606033 | 5.19504414 | 3.87703134 | 0.00082173 | 0.011696211 | -0.604369478 |
| PSMD14 | 0.811206661 | 6.141672603 | 3.876927134 | 0.000821938 | 0.011696211 | -0.604607538 |
| ARAP1 | 0.752319489 | 6.217659301 | 3.876080888 | 0.000823626 | 0.011711072 | -0.60654077 |
| PLCH2 | 1.490161802 | 5.108986576 | 3.874697321 | 0.000826394 | 0.011741245 | -0.609701367 |
| GNPDA1 | 0.795905925 | 5.297583024 | 3.873805837 | 0.000828182 | 0.011749633 | -0.611737771 |
| FZR1 | 0.590741532 | 4.85722125 | 3.873654435 | 0.000828486 | 0.011749633 | -0.612083609 |
| PSMA5 | 0.664392152 | 5.715391233 | 3.873437246 | 0.000828922 | 0.011749633 | -0.612579718 |
| AFG1L | 0.877911859 | 1.638153968 | 3.872281592 | 0.000831248 | 0.011773424 | -0.615219425 |
| MAMDC2 | -1.387977152 | 0.85989546 | -3.871960198 | 0.000831896 | 0.011773432 | -0.61595352 |
| CHGB | -3.408484031 | -0.237881298 | -3.87037534 | 0.000835099 | 0.011809567 | -0.619573367 |
| RARB | 1.226794502 | 4.175112284 | 3.869840033 | 0.000836183 | 0.011815715 | -0.62079597 |
| ARRDC4 | 1.347113757 | 4.542958605 | 3.865035548 | 0.000845979 | 0.011935591 | -0.631767951 |
| CASTOR2 | 0.8808939 | 3.344097201 | 3.863923792 | 0.000848262 | 0.01195137 | -0.634306576 |
| TMEM51 | 1.071502768 | 4.627341812 | 3.863755511 | 0.000848608 | 0.01195137 | -0.634690824 |
| ZNF738 | 1.052482933 | 3.187360113 | 3.863531515 | 0.000849069 | 0.01195137 | -0.63520229 |
| NOMO2 | 1.854055556 | 4.340430235 | 3.861869059 | 0.000852497 | 0.011977683 | -0.638998143 |
| HS1BP3 | 0.619256222 | 4.085723596 | 3.861660839 | 0.000852928 | 0.011977683 | -0.639473551 |
| MGAT2 | 0.802598332 | 5.156216981 | 3.860511352 | 0.000855308 | 0.011977683 | -0.64209799 |
| NCS1 | 0.940299157 | 4.021232397 | 3.86012093 | 0.000856117 | 0.011977683 | -0.642989351 |
| HK3 | 3.012114834 | 1.84407883 | 3.860095776 | 0.00085617 | 0.011977683 | -0.643046777 |
| EEF1E1 | 0.709087216 | 5.35148681 | 3.860013937 | 0.000856339 | 0.011977683 | -0.64323362 |
| RGN | -1.812372306 | 1.719804691 | -3.859823917 | 0.000856734 | 0.011977683 | -0.643667443 |
| PLAU | 1.540802496 | 4.459353758 | 3.859076506 | 0.000858287 | 0.011977683 | -0.645373778 |
| CYB561D1 | 0.798306822 | 3.445140264 | 3.858756802 | 0.000858953 | 0.011977683 | -0.646103644 |
| UBL3 | 0.977159937 | 5.076146224 | 3.858542848 | 0.000859398 | 0.011977683 | -0.646592085 |
| PARP16 | -0.777318691 | 3.766951384 | -3.858374745 | 0.000859748 | 0.011977683 | -0.646975849 |
| ACBD3 | 0.832492954 | 5.113535995 | 3.857753986 | 0.000861043 | 0.011979225 | -0.64839296 |
| FBXO8 | 0.684302587 | 4.677152392 | 3.857493204 | 0.000861587 | 0.011979225 | -0.648988283 |
| PSMA4 | 0.667248264 | 7.771011835 | 3.856423581 | 0.000863824 | 0.011997381 | -0.651429989 |
| DOK4 | 0.705424065 | 4.412238868 | 3.856237897 | 0.000864213 | 0.011997381 | -0.651853853 |
| RCAN2 | -1.440362033 | 3.36957999 | -3.85545324 | 0.000865858 | 0.012011049 | -0.653644969 |
| ZNF888 | 1.045322548 | 4.238391386 | 3.854440815 | 0.000867985 | 0.012031379 | -0.655955922 |
| SINHCAF | 0.98251859 | 5.621991279 | 3.853860547 | 0.000869206 | 0.012039134 | -0.657280398 |
| TNFRSF11A | -1.663427625 | 1.426084243 | -3.853205008 | 0.000870588 | 0.012049098 | -0.658776642 |
| HOXD10 | 3.194661366 | #NAME? | 3.872311467 | 0.000890578 | 0.012205013 | -0.663594438 |
| GPR182 | -1.697149856 | -2.483192372 | -3.850785536 | 0.000875708 | 0.012096155 | -0.664298671 |
| SNCG | -1.2515203 | 4.837938767 | -3.8506555 | 0.000875983 | 0.012096155 | -0.664595442 |
| CHL1 | 1.659493374 | 5.370608033 | 3.849800215 | 0.000877801 | 0.012112054 | -0.666547347 |
| IL36G | 1.936036181 | #NAME? | 3.950117162 | 0.000951536 | 0.012696671 | -0.666572861 |
| SLC38A6 | 0.969199818 | 4.005593683 | 3.847525264 | 0.000882653 | 0.012157643 | -0.671738847 |
| AVIL | 1.134744789 | 3.65401944 | 3.847311521 | 0.00088311 | 0.012157643 | -0.672226593 |
| CMAS | 0.751947767 | 6.278406406 | 3.846396823 | 0.00088507 | 0.012175401 | -0.674313807 |
| PFKFB3 | 1.287445326 | 4.170041667 | 3.845949828 | 0.000886029 | 0.012179382 | -0.675333761 |
| ACSL4 | 1.09752032 | 4.424042149 | 3.845626077 | 0.000886724 | 0.012179734 | -0.676072486 |
| STING1 | 0.783287159 | 7.478090491 | 3.844240692 | 0.000889706 | 0.012205013 | -0.679233503 |
| TTC9C | 0.72093382 | 4.757774342 | 3.844005892 | 0.000890212 | 0.012205013 | -0.679769227 |
| DUSP9 | 2.045879202 | -0.400142998 | 3.843510689 | 0.000891281 | 0.012205445 | -0.680899074 |
| MNT | 0.687431527 | 3.373152357 | 3.842497009 | 0.000893472 | 0.012226251 | -0.683211796 |
| ADSS2 | 0.968712279 | 6.130463282 | 3.841907121 | 0.00089475 | 0.012234531 | -0.684557589 |
| TMTC3 | 1.497383586 | 3.848073039 | 3.841487194 | 0.000895661 | 0.012237783 | -0.685515609 |
| FBXO28 | 0.6492203 | 3.972947164 | 3.840408564 | 0.000898005 | 0.012260593 | -0.687976312 |
| ZFAT | 0.916337392 | 1.594872748 | 3.839127087 | 0.000900797 | 0.012284044 | -0.690899638 |
| RALGAPA2 | 0.937479741 | 4.74788368 | 3.839000456 | 0.000901073 | 0.012284044 | -0.691188503 |
| CSN3 | -2.409894731 | #NAME? | -4.160842177 | 0.00114513 | 0.01409021 | -0.692322199 |
| SUSD6 | 1.021333901 | 4.817324268 | 3.837326905 | 0.000904734 | 0.012324709 | -0.695005985 |
| DNASE1L3 | -2.292998455 | 3.380366423 | -3.836601011 | 0.000906326 | 0.012337158 | -0.696661718 |
| CLSTN1 | 0.848260651 | 7.335020291 | 3.833586957 | 0.000912967 | 0.012390465 | -0.70353612 |
| UGCG | 1.097778385 | 5.599606223 | 3.832322287 | 0.000915768 | 0.01241921 | -0.706420304 |
| FAM3C | 0.766945957 | 6.69407118 | 3.831623266 | 0.00091732 | 0.012423028 | -0.708014416 |
| YWHAG | 0.998411132 | 5.500443064 | 3.831580088 | 0.000917416 | 0.012423028 | -0.708112882 |
| TUT7 | 0.719990093 | 4.091405292 | 3.830047891 | 0.000920827 | 0.012459939 | -0.711606878 |
| C1orf56 | 0.72641789 | 2.804685493 | 3.829427996 | 0.00092221 | 0.012468323 | -0.713020412 |
| BMPR1B | 1.545114043 | 2.780047189 | 3.829156217 | 0.000922818 | 0.012468323 | -0.713640134 |
| HTATIP2 | 0.765376938 | 6.083424535 | 3.828745603 | 0.000923736 | 0.012471463 | -0.714576421 |
| SLC38A9 | 0.710281434 | 3.39175239 | 3.828422556 | 0.000924459 | 0.012471965 | -0.715313024 |
| RSPO4 | -2.377082371 | -2.545976848 | -3.827616962 | 0.000926264 | 0.012487059 | -0.717149875 |
| PPID | 0.85788484 | 5.575440908 | 3.82573697 | 0.000930491 | 0.012529318 | -0.721436245 |
| BEND7 | -0.736391988 | 3.841361754 | -3.825075798 | 0.000931982 | 0.012529318 | -0.722943633 |
| DPYSL3 | 1.268198244 | 5.763392941 | 3.825020211 | 0.000932108 | 0.012529318 | -0.723070363 |
| TMX1 | 0.822152364 | 4.798091975 | 3.824479317 | 0.000933329 | 0.012535842 | -0.724303498 |
| PHGDH | -1.438340673 | 5.8756102 | -3.823971933 | 0.000934477 | 0.012541991 | -0.725460214 |
| CHCHD3 | 0.694607099 | 5.338088761 | 3.82360886 | 0.000935299 | 0.012543766 | -0.726287919 |
| CHD4 | 0.6583428 | 6.188064649 | 3.820703035 | 0.000941903 | 0.012623033 | -0.732911933 |
| MYL12B | 0.64345301 | 9.299474919 | 3.819879768 | 0.000943783 | 0.012638908 | -0.734788477 |
| MUC16 | 2.578842114 | 6.533951314 | 3.819525886 | 0.000944592 | 0.012640434 | -0.735595091 |
| FASTKD5 | 0.94729166 | 3.732012407 | 3.817931164 | 0.000948246 | 0.012671857 | -0.73922984 |
| C5AR1 | 1.571866322 | 4.97151105 | 3.817893142 | 0.000948334 | 0.012671857 | -0.739316498 |
| STIM2 | 1.135486226 | 5.533336117 | 3.816210687 | 0.000952205 | 0.012696671 | -0.743150939 |
| ZSCAN20 | 0.972244927 | 0.804451415 | 3.816175752 | 0.000952285 | 0.012696671 | -0.743230557 |
| NUP37 | 0.733030926 | 4.418412746 | 3.81069828 | 0.000964997 | 0.012847322 | -0.755712216 |
| MTARC1 | -0.982621511 | 3.584540003 | -3.809568511 | 0.00096764 | 0.012856239 | -0.758286287 |
| ARF6 | 0.77350703 | 6.14728877 | 3.809505447 | 0.000967788 | 0.012856239 | -0.758429969 |
| CDRT15 | 1.9088678 | #NAME? | 3.829457277 | 0.000986067 | 0.013022961 | -0.759611358 |
| ZFTA | 0.994271734 | 3.39649372 | 3.808539074 | 0.000970054 | 0.012876942 | -0.760631653 |
| SYK | 0.956136712 | 3.879882253 | 3.807157605 | 0.000973304 | 0.012910651 | -0.763778889 |
| BCL7A | 1.0568749 | 3.808330935 | 3.804809228 | 0.000978852 | 0.012965333 | -0.76912849 |
| MAPRE1 | 0.864672295 | 6.05287454 | 3.803060548 | 0.000983004 | 0.013010848 | -0.773111628 |
| GLE1 | 0.791631626 | 4.768922985 | 3.80208282 | 0.000985333 | 0.013022961 | -0.775338562 |
| PAK1 | 0.887219213 | 5.928750041 | 3.801915178 | 0.000985732 | 0.013022961 | -0.775720385 |
| ZBED4 | 0.931167793 | 2.838886557 | 3.800694552 | 0.000988649 | 0.01304758 | -0.778500403 |
| B3GNT8 | 1.616898585 | 1.737256135 | 3.798956981 | 0.000992815 | 0.013084185 | -0.782457532 |
| PPP1R3D | 0.996746643 | 3.393003243 | 3.798937632 | 0.000992861 | 0.013084185 | -0.782501594 |
| IPO7 | 1.13961123 | 4.858226847 | 3.797154559 | 0.000997155 | 0.01313125 | -0.786562031 |
| PDE9A | -0.797892712 | 3.834078948 | -3.796786645 | 0.000998043 | 0.013133436 | -0.787399811 |
| IFT80 | 1.451060864 | 4.846218339 | 3.796412784 | 0.000998946 | 0.013135818 | -0.788251116 |
| UHMK1 | 1.009931586 | 4.643712456 | 3.795143959 | 0.001002018 | 0.013164942 | -0.791140213 |
| MYO3A | 2.623555724 | -0.880773699 | 3.794900357 | 0.001002609 | 0.013164942 | -0.791694872 |
| SUCLA2 | 0.782076039 | 5.152603174 | 3.792546684 | 0.001008335 | 0.013221146 | -0.797053668 |
| SMARCA5 | 0.729952959 | 4.907515476 | 3.792275251 | 0.001008998 | 0.013221146 | -0.797671624 |
| DNAJA1 | 0.985900107 | 7.492407567 | 3.792245494 | 0.00100907 | 0.013221146 | -0.797739371 |
| KATNBL1 | 0.700741658 | 4.452447152 | 3.79124641 | 0.001011512 | 0.013236824 | -0.800013865 |
| RBM15 | 0.830195134 | 1.775318164 | 3.791053516 | 0.001011985 | 0.013236824 | -0.800452994 |
| G3BP1 | 0.974333096 | 4.667472542 | 3.790594894 | 0.001013108 | 0.013236824 | -0.801497039 |
| PRDX3 | 0.768539668 | 7.442926469 | 3.790395311 | 0.001013597 | 0.013236824 | -0.801951381 |
| APOBEC3A | -2.055554204 | 3.185374991 | -3.78985609 | 0.001014921 | 0.013240565 | -0.803178872 |
| PTGDR | -2.45605319 | 0.761287709 | -3.788439152 | 0.001018406 | 0.013276509 | -0.806404275 |
| ZBED1 | 0.724568074 | 5.012779761 | 3.787931209 | 0.001019658 | 0.013283312 | -0.807560464 |
| SLC30A1 | 1.046211452 | 3.902223318 | 3.787123959 | 0.001021651 | 0.013299752 | -0.809397889 |
| TXNRD1 | 0.99210309 | 5.573613213 | 3.786722522 | 0.001022644 | 0.013303152 | -0.810311595 |
| CACNA1E | -3.551375016 | #NAME? | -3.805971582 | 0.001042637 | 0.013437358 | -0.81217246 |
| UTP25 | 0.800392542 | 2.529787912 | 3.783767003 | 0.001029982 | 0.013360379 | -0.81703812 |
| PRR5L | 1.816011676 | 4.674978775 | 3.783109538 | 0.001031621 | 0.01336776 | -0.818534338 |
| METAP2 | 0.667169151 | 5.617731344 | 3.782859276 | 0.001032246 | 0.01336776 | -0.819103855 |
| CEP290 | 1.141367131 | 2.987239746 | 3.782655026 | 0.001032756 | 0.01336776 | -0.819568661 |
| RNASE1 | -2.099417021 | 7.395782096 | -3.782158484 | 0.001033997 | 0.013374306 | -0.820698607 |
| STK26 | 1.172902511 | 3.526989895 | 3.780400965 | 0.001038402 | 0.013421737 | -0.824697866 |
| ACTR2 | 1.029350654 | 6.845201684 | 3.779940723 | 0.001039559 | 0.013427144 | -0.8257451 |
| DBNL | 0.68376074 | 5.082651413 | 3.779550076 | 0.001040542 | 0.013430298 | -0.82663396 |
| PSMD2 | 0.62806465 | 6.908437605 | 3.779108522 | 0.001041653 | 0.013435114 | -0.827638634 |
| NR1H4 | -2.937401677 | -2.460680302 | -3.778453416 | 0.001043305 | 0.013437358 | -0.829129167 |
| SPINT1 | 0.811274253 | 7.184894427 | 3.777836938 | 0.001044862 | 0.013447885 | -0.830531773 |
| LRRC25 | 1.40258394 | 2.453177324 | 3.777143349 | 0.001046616 | 0.013460936 | -0.832109773 |
| OGFRL1 | -1.106452148 | 4.165923712 | -3.775375352 | 0.001051101 | 0.013480482 | -0.836131956 |
| USP46 | 0.768678247 | 3.226717872 | 3.774983794 | 0.001052097 | 0.013483744 | -0.837022705 |
| ELK1 | 0.771872419 | 3.860003503 | 3.772375018 | 0.001058755 | 0.01355138 | -0.842956955 |
| RRM2B | 0.807355224 | 3.971388081 | 3.772332317 | 0.001058865 | 0.01355138 | -0.843054084 |
| DHX34 | 0.646950487 | 3.364961646 | 3.770919266 | 0.001062489 | 0.013588202 | -0.846268085 |
| HDGFL3 | 0.601337427 | 3.353874678 | 3.770347671 | 0.001063958 | 0.013594636 | -0.847568124 |
| ADAM10 | 0.960312646 | 5.174944783 | 3.770112762 | 0.001064563 | 0.013594636 | -0.848102394 |
| ZNF334 | 1.003512942 | 3.129029894 | 3.769570806 | 0.001065959 | 0.013594636 | -0.849334978 |
| ACTL10 | 0.69579025 | 2.560681788 | 3.76937157 | 0.001066473 | 0.013594636 | -0.849788096 |
| LY6E | 1.102476656 | 8.705691365 | 3.768784054 | 0.001067989 | 0.013594636 | -0.851124251 |
| KLHL14 | -2.040813954 | -0.300342785 | -3.768707189 | 0.001068187 | 0.013594636 | -0.85129906 |
| MYORG | 0.749339348 | 4.061285615 | 3.768692673 | 0.001068225 | 0.013594636 | -0.851332071 |
| SIGLEC7 | 2.085359993 | 1.10977662 | 3.76673176 | 0.001073301 | 0.013621117 | -0.855791384 |
| MAP3K5 | 1.025687105 | 4.297379621 | 3.763847053 | 0.001080813 | 0.013697331 | -0.862350759 |
| CLDN12 | 0.908378069 | 4.641394246 | 3.763250224 | 0.001082374 | 0.0137027 | -0.863707747 |
| FOCAD | 1.191668126 | 3.932231543 | 3.76249279 | 0.001084358 | 0.01370405 | -0.865429839 |
| LOX | 1.430087959 | 4.466163028 | 3.760790886 | 0.001088828 | 0.013732211 | -0.869299045 |
| HBE1 | -2.036015728 | #NAME? | -4.006000558 | 0.001326723 | 0.015319223 | -0.869580951 |
| POMP | 0.655856061 | 7.191932892 | 3.76043709 | 0.00108976 | 0.013732211 | -0.870103346 |
| NSD3 | 0.766331014 | 4.771902388 | 3.760264809 | 0.001090214 | 0.013732211 | -0.870494996 |
| CSRP1 | -0.756603987 | 7.214596562 | -3.760020142 | 0.001090859 | 0.013732211 | -0.871051198 |
| VWDE | -1.911385967 | 0.881476239 | -3.759636202 | 0.001091872 | 0.013732211 | -0.871923994 |
| ATP6V1B2 | 0.756635312 | 5.60256346 | 3.759182298 | 0.00109307 | 0.013737786 | -0.872955816 |
| PTPN12 | 0.840685444 | 5.438341216 | 3.758082849 | 0.001095979 | 0.013764831 | -0.875455014 |
| SUSD1 | 0.795326147 | 2.852510272 | 3.757417528 | 0.001097743 | 0.013768742 | -0.876967316 |
| ANKRD65 | 1.383270635 | 6.479489772 | 3.757394297 | 0.001097805 | 0.013768742 | -0.877020119 |
| GFAP | -2.698699969 | #NAME? | -3.776132363 | 0.001119171 | 0.013911988 | -0.878887198 |
| GNB1 | 0.628276019 | 7.334507356 | 3.756457407 | 0.001100294 | 0.013790447 | -0.879149627 |
| EDDM13 | 1.84301974 | -0.616091723 | 3.755332612 | 0.001103289 | 0.013808956 | -0.881706108 |
| THAP10 | 1.186579142 | 2.232351389 | 3.753805359 | 0.001107369 | 0.013831465 | -0.885177093 |
| THAP1 | 0.76652685 | 3.183549086 | 3.753157943 | 0.001109103 | 0.013843616 | -0.886648398 |
| PRR16 | 2.497589428 | 0.467623515 | 3.751362869 | 0.001113925 | 0.013894267 | -0.890727613 |
| BMP1 | 1.163801523 | 4.108068883 | 3.751078141 | 0.001114692 | 0.013894302 | -0.891374611 |
| NUDT5 | 0.608846997 | 4.887329102 | 3.750148752 | 0.001117198 | 0.013911988 | -0.893486434 |
| RBM15B | 0.685736545 | 4.326367795 | 3.749827723 | 0.001118065 | 0.013911988 | -0.894215876 |
| RHBDF2 | 1.271067565 | 3.989197602 | 3.749628257 | 0.001118604 | 0.013911988 | -0.894669098 |
| TULP3 | 0.982368508 | 4.012649552 | 3.747934883 | 0.001123191 | 0.0139459 | -0.898516563 |
| TMOD3 | 0.965591178 | 4.502971679 | 3.74762212 | 0.00112404 | 0.0139459 | -0.899227149 |
| HSPE1 | 0.805557236 | 8.028808271 | 3.747563572 | 0.001124199 | 0.0139459 | -0.899360167 |
| PLXNB1 | 1.07009564 | 6.37164012 | 3.746751703 | 0.001126407 | 0.013954187 | -0.901204648 |
| PAPPA | 1.654592643 | 1.124523829 | 3.746692381 | 0.001126568 | 0.013954187 | -0.901339416 |
| TPM3 | 0.88282325 | 7.143153096 | 3.746471736 | 0.001127169 | 0.013954187 | -0.901840685 |
| HMGA2 | 1.424753273 | 0.883002946 | 3.745918034 | 0.001128678 | 0.013963363 | -0.903098579 |
| EIF4E | 0.71786641 | 5.693761946 | 3.744950419 | 0.00113132 | 0.013981695 | -0.905296715 |
| ANO8 | 1.272229702 | 2.888418934 | 3.744812364 | 0.001131698 | 0.013981695 | -0.905610328 |
| EMC2 | 0.950642264 | 5.186134891 | 3.744177247 | 0.001133436 | 0.01399366 | -0.90705306 |
| HMGCLL1 | -2.210325812 | #NAME? | -3.864547998 | 0.001261443 | 0.014895534 | -0.909790579 |
| BAG4 | 0.685862263 | 3.4111301 | 3.742159381 | 0.001138975 | 0.014052511 | -0.911636553 |
| RNASEL | 0.893121062 | 3.758601389 | 3.741820069 | 0.001139909 | 0.0140545 | -0.912407242 |
| ZNF195 | 0.649753416 | 4.282621811 | 3.741189123 | 0.001141648 | 0.014062875 | -0.913840293 |
| SLC24A1 | 0.768860622 | 2.447802537 | 3.741012658 | 0.001142135 | 0.014062875 | -0.914241087 |
| DCX | -1.781073059 | -3.58229511 | -3.738356497 | 0.001149487 | 0.014124714 | -0.920273416 |
| ABI1 | 0.856463797 | 6.009895043 | 3.737561337 | 0.001151697 | 0.014128911 | -0.922079129 |
| DES | -5.595897524 | 0.583864747 | -3.737559024 | 0.001151704 | 0.014128911 | -0.922084382 |
| TOP1 | 1.073673531 | 5.632798131 | 3.737395269 | 0.00115216 | 0.014128911 | -0.922456243 |
| CXADR | 0.932167932 | 4.686535721 | 3.735721224 | 0.001156828 | 0.014176602 | -0.926257538 |
| BCL6 | 1.027894101 | 6.714491253 | 3.735367117 | 0.001157818 | 0.014179178 | -0.927061577 |
| CDC123 | 0.623387368 | 6.313875311 | 3.732191046 | 0.001166734 | 0.0142624 | -0.934272573 |
| USP9X | 0.770485244 | 4.046088809 | 3.731975115 | 0.001167343 | 0.0142624 | -0.934762785 |
| SYCP3 | -1.39544146 | 1.315232601 | -3.73146641 | 0.001168778 | 0.014265368 | -0.935917639 |
| GNAL | 0.968904528 | 3.933285232 | 3.728767898 | 0.00117642 | 0.014323516 | -0.942043269 |
| NKAPD1 | 0.740216537 | 4.033125932 | 3.728145179 | 0.001178191 | 0.014323516 | -0.943456729 |
| C19orf71 | 0.778493886 | 3.033230869 | 3.728008319 | 0.00117858 | 0.014323516 | -0.943767368 |
| KIAA0513 | 1.040274782 | 3.915218101 | 3.727985332 | 0.001178645 | 0.014323516 | -0.943819544 |
| CUL2 | 0.660008262 | 3.996763073 | 3.727891903 | 0.001178911 | 0.014323516 | -0.944031606 |
| UNC5B | 1.223777506 | 3.629905565 | 3.727690078 | 0.001179486 | 0.014323516 | -0.944489695 |
| SDHD | 0.71969957 | 7.11994673 | 3.727564789 | 0.001179843 | 0.014323516 | -0.944774068 |
| STK38 | 0.751834368 | 6.682344217 | 3.726991628 | 0.001181477 | 0.014333786 | -0.946074961 |
| STARD5 | 1.623048627 | 2.645596388 | 3.722674661 | 0.001193858 | 0.014464686 | -0.955871911 |
| ANXA1 | 1.035745405 | 10.38139423 | 3.722032581 | 0.00119571 | 0.014475257 | -0.957328869 |
| USP31 | 1.18483371 | 3.473632596 | 3.721653251 | 0.001196805 | 0.014475257 | -0.958189595 |
| B3GALT6 | 0.620163108 | 4.195944935 | 3.721369526 | 0.001197626 | 0.014475257 | -0.958833374 |
| YIPF1 | 0.643272782 | 5.554913565 | 3.72126983 | 0.001197914 | 0.014475257 | -0.959059585 |
| SRGAP2 | 0.816841857 | 3.751192216 | 3.720991218 | 0.00119872 | 0.014475379 | -0.959691753 |
| COX10 | 0.811930281 | 2.854093265 | 3.720328594 | 0.001200639 | 0.014488935 | -0.9611952 |
| RHCE | -1.716625449 | 0.344841363 | -3.719765261 | 0.001202273 | 0.014494855 | -0.962473322 |
| MICALL2 | 0.867018921 | 5.385798365 | 3.718947032 | 0.001204651 | 0.014508461 | -0.964329706 |
| PYGO2 | 0.622058621 | 4.743487126 | 3.717881367 | 0.001207754 | 0.014532967 | -0.966747351 |
| POLR2E | 0.59417309 | 6.906332769 | 3.717699711 | 0.001208284 | 0.014532967 | -0.967159455 |
| NIP7 | 0.779661858 | 4.648972709 | 3.717209085 | 0.001209716 | 0.014540574 | -0.968272471 |
| INTS4 | 0.704304889 | 4.026860258 | 3.716498171 | 0.001211793 | 0.014555929 | -0.969885176 |
| FBN3 | -2.445168263 | -2.15555366 | -3.716126866 | 0.00121288 | 0.014559365 | -0.970727456 |
| CERT1 | 0.87152565 | 4.809973685 | 3.715480781 | 0.001214773 | 0.014572472 | -0.972193017 |
| CCDC184 | 2.080947288 | 1.189061178 | 3.714341488 | 0.001218119 | 0.014602971 | -0.97477724 |
| TTLL4 | 0.737966688 | 3.306656026 | 3.714033183 | 0.001219026 | 0.014604215 | -0.975476533 |
| C8orf76 | 0.642158781 | 5.607462656 | 3.713032642 | 0.001221973 | 0.014623915 | -0.977745872 |
| CA3 | -1.332769016 | 2.4273839 | -3.712929244 | 0.001222278 | 0.014623915 | -0.977980383 |
| PALM3 | -1.350227506 | 1.209002133 | -3.711286776 | 0.001227133 | 0.014672353 | -0.98170541 |
| SMC4 | 1.534164235 | 4.074183635 | 3.710535271 | 0.001229361 | 0.014684497 | -0.983409677 |
| ZNF562 | 0.802012903 | 3.627918181 | 3.710399554 | 0.001229764 | 0.014684497 | -0.98371745 |
| ATXN10 | 0.595122323 | 5.9830332 | 3.70973738 | 0.001231731 | 0.014698333 | -0.985219068 |
| DOLK | 0.642628493 | 4.020097273 | 3.707199433 | 0.001239299 | 0.014768056 | -0.990973916 |
| MEX3D | 0.974234018 | 3.964770004 | 3.706961629 | 0.00124001 | 0.014768056 | -0.991513105 |
| H2AW | 1.645891537 | 4.433698743 | 3.704234046 | 0.001248199 | 0.014814235 | -0.997697041 |
| PRORP | 0.814831355 | 4.204066221 | 3.704160826 | 0.001248419 | 0.014814235 | -0.997863034 |
| XRCC1 | 0.638712697 | 4.923406443 | 3.704046137 | 0.001248765 | 0.014814235 | -0.998123034 |
| ACVR2B | 0.945961331 | 0.900102915 | 3.703782004 | 0.001249561 | 0.014814235 | -0.998721821 |
| BCAS4 | 1.112279186 | 3.782990344 | 3.703617578 | 0.001250057 | 0.014814235 | -0.999094569 |
| STK3 | 0.652813368 | 4.077388111 | 3.70361088 | 0.001250077 | 0.014814235 | -0.999109753 |
| RNF6 | 0.968619143 | 4.905974109 | 3.703384977 | 0.001250759 | 0.014814235 | -0.999621861 |
| PTPRK | 0.784441091 | 5.046002498 | 3.703232587 | 0.001251219 | 0.014814235 | -0.999967315 |
| DRD1 | 2.377536266 | -0.324102208 | 3.702847481 | 0.001252382 | 0.014816393 | -1.000840307 |
| CDK7 | 0.710019853 | 5.386710644 | 3.700596764 | 0.001259202 | 0.01487969 | -1.005942073 |
| TENT5A | -1.360511295 | 3.761968103 | -3.699617398 | 0.001262181 | 0.014895534 | -1.008161846 |
| RNF123 | 0.830610094 | 3.789258653 | 3.699026618 | 0.001263981 | 0.014907107 | -1.009500817 |
| MRTFA | 0.630143875 | 3.989175092 | 3.698688191 | 0.001265013 | 0.014909615 | -1.010267823 |
| TARS1 | 0.754324482 | 5.653627595 | 3.698161921 | 0.001266621 | 0.014914212 | -1.01146053 |
| ZDHHC7 | 0.873402485 | 5.987880877 | 3.698023496 | 0.001267044 | 0.014914212 | -1.011774242 |
| FBXL16 | 1.245665783 | 0.072067573 | 3.696746667 | 0.001270953 | 0.014950547 | -1.014667812 |
| PLD1 | 0.951253866 | 3.65131807 | 3.695387031 | 0.001275128 | 0.014980285 | -1.017748827 |
| HMGA1 | 1.222274029 | 6.407617413 | 3.694467955 | 0.001277958 | 0.014998679 | -1.019831384 |
| NFAM1 | 1.508955637 | 1.339043853 | 3.694343106 | 0.001278343 | 0.014998679 | -1.020114274 |
| MTFR1 | 0.75596938 | 3.889719593 | 3.69351322 | 0.001280905 | 0.015009367 | -1.021994633 |
| USP38 | 0.792339538 | 2.931058548 | 3.692350614 | 0.001284502 | 0.015019221 | -1.024628732 |
| YRDC | 0.82449288 | 4.247276592 | 3.691992337 | 0.001285613 | 0.015019221 | -1.025440442 |
| LINGO4 | -2.140350492 | -1.730915288 | -3.691907688 | 0.001285875 | 0.015019221 | -1.02563222 |
| MSH6 | 0.773569495 | 4.736789612 | 3.690080957 | 0.001291553 | 0.015075859 | -1.029770592 |
| NAA40 | 0.757886909 | 4.902967149 | 3.688476543 | 0.001296561 | 0.015110126 | -1.033404983 |
| FKBP1A | 0.715533163 | 7.359733622 | 3.688342005 | 0.001296982 | 0.015110126 | -1.033709731 |
| ISCA2 | 0.637902302 | 4.543687662 | 3.687374503 | 0.001300011 | 0.015135728 | -1.035901194 |
| MIA2 | 0.759103733 | 5.996333697 | 3.686750491 | 0.001301969 | 0.015148824 | -1.037314568 |
| PSMD1 | 0.800463947 | 5.572463938 | 3.685604059 | 0.001305574 | 0.015171351 | -1.03991109 |
| KNOP1 | 0.663299335 | 4.112070101 | 3.683955339 | 0.001310775 | 0.015212349 | -1.043644949 |
| ADCY9 | 1.389277988 | 3.33609205 | 3.682648421 | 0.001314912 | 0.015250633 | -1.046604494 |
| YTHDF3 | 0.694508375 | 4.767987447 | 3.681187128 | 0.001319553 | 0.015263521 | -1.049913378 |
| CARD9 | 1.182100455 | 2.337437873 | 3.681068071 | 0.001319932 | 0.015263521 | -1.050182954 |
| TRMT61B | 0.58857309 | 4.140671154 | 3.680977704 | 0.00132022 | 0.015263521 | -1.050387567 |
| PTPN1 | 0.826103207 | 4.957722579 | 3.680509834 | 0.00132171 | 0.015271041 | -1.051446923 |
| TIGAR | 0.891121245 | 1.911888414 | 3.678425618 | 0.001328368 | 0.015328495 | -1.056165703 |
| FKBP15 | 0.730614433 | 4.635652575 | 3.677099414 | 0.001332622 | 0.015367832 | -1.059168022 |
| MMP25 | 1.279945107 | 2.134502122 | 3.67609586 | 0.00133585 | 0.015376021 | -1.06143977 |
| BUB1 | 2.810492236 | 1.933790809 | 3.675625913 | 0.001337365 | 0.015383499 | -1.062503547 |
| SDK1 | 2.380994506 | 3.828645838 | 3.67533014 | 0.001338318 | 0.015384741 | -1.06317305 |
| PIGS | 0.654573019 | 5.325466509 | 3.674783935 | 0.001340082 | 0.0153888 | -1.064409392 |
| BSDC1 | 0.730372121 | 5.35458354 | 3.674654588 | 0.0013405 | 0.0153888 | -1.064702166 |
| KTI12 | 0.655008385 | 3.695441223 | 3.674252044 | 0.001341801 | 0.0153888 | -1.065613298 |
| GSTA5 | -2.910490721 | #NAME? | -3.695525252 | 0.001551948 | 0.016783482 | -1.067670621 |
| CALY | -2.178557139 | #NAME? | -3.733928805 | 0.001422251 | 0.015985822 | -1.067821673 |
| GLCE | 0.819863865 | 3.861776282 | 3.672958534 | 0.001345991 | 0.015407166 | -1.068540942 |
| FBXO46 | 0.776011008 | 3.548005309 | 3.672894364 | 0.0013462 | 0.015407166 | -1.068686176 |
| NAA20 | 0.657293066 | 6.864351573 | 3.671859446 | 0.001349562 | 0.015416542 | -1.071028383 |
| CYSLTR1 | 1.864214132 | 2.765081983 | 3.67093231 | 0.001352581 | 0.015441332 | -1.073126547 |
| SIX4 | 1.075512452 | 3.56396221 | 3.669248052 | 0.001358083 | 0.015484702 | -1.076937853 |
| UGDH | 1.488043027 | 5.464614235 | 3.668672966 | 0.001359967 | 0.015496463 | -1.078239133 |
| LYRM1 | 0.592045379 | 5.102030026 | 3.667360467 | 0.001364275 | 0.015535824 | -1.081208845 |
| CASP7 | 0.818330974 | 6.017890923 | 3.66435745 | 0.001374184 | 0.015629088 | -1.088002784 |
| CDC5L | 0.65120991 | 4.185085098 | 3.661404454 | 0.001383997 | 0.015730855 | -1.094682452 |
| CHST7 | 0.913275478 | 2.450101191 | 3.660171963 | 0.001388113 | 0.015757941 | -1.097470019 |
| FASTKD1 | 0.792123279 | 4.142058851 | 3.659845489 | 0.001389205 | 0.015760503 | -1.098208385 |
| PGAM1 | 0.993967443 | 8.075963463 | 3.658600293 | 0.001393379 | 0.015778326 | -1.101024441 |
| IL36A | 2.326711309 | #NAME? | 4.137345231 | 0.002085681 | 0.019511417 | -1.101451785 |
| CERS2 | 0.589478176 | 6.133465788 | 3.656533408 | 0.001400335 | 0.015837366 | -1.105698342 |
| CD300A | 1.443769288 | 3.783779623 | 3.656136662 | 0.001401674 | 0.015842657 | -1.106595454 |
| CDH26 | 3.55278489 | 5.704960417 | 3.654382252 | 0.00140761 | 0.015899872 | -1.110562234 |
| RAC1 | 0.750286871 | 8.213570942 | 3.65263683 | 0.00141354 | 0.01594705 | -1.114508303 |
| CNIH4 | 0.658826399 | 5.334808354 | 3.65215937 | 0.001415167 | 0.015955502 | -1.115587682 |
| NUFIP2 | 0.74890912 | 4.399953437 | 3.651432092 | 0.001417648 | 0.015961833 | -1.117231762 |
| XRRA1 | 0.616339144 | 3.77513678 | 3.651416298 | 0.001417702 | 0.015961833 | -1.117267464 |
| SLC26A7 | -2.520481304 | -0.894036735 | -3.651223196 | 0.001418362 | 0.015961833 | -1.117703979 |
| KLHL2 | 0.690965418 | 4.843244051 | 3.650153872 | 0.001422019 | 0.015985822 | -1.120121132 |
| NMI | 1.118678149 | 5.839614094 | 3.648480707 | 0.001427761 | 0.016030192 | -1.123902944 |
| NOP10 | 0.650559931 | 7.20418015 | 3.648422331 | 0.001427962 | 0.016030192 | -1.124034884 |
| ADAMTSL5 | 1.815748365 | 2.513403823 | 3.648146209 | 0.001428912 | 0.016030959 | -1.124658959 |
| GMFB | 0.92711992 | 4.258239967 | 3.647837025 | 0.001429976 | 0.01603301 | -1.125357746 |
| FAM83B | 1.300466848 | 2.573100037 | 3.64736282 | 0.00143161 | 0.01604144 | -1.126429476 |
| LDHB | 1.027918771 | 9.224792218 | 3.645926813 | 0.001436569 | 0.016077197 | -1.129674754 |
| NOXO1 | -1.928473466 | 0.106311545 | -3.645590154 | 0.001437734 | 0.016080341 | -1.130435539 |
| FEM1B | 0.698381885 | 4.128856879 | 3.644944956 | 0.00143997 | 0.01608863 | -1.13189353 |
| SELENOT | 0.62242194 | 5.637846334 | 3.644865652 | 0.001440245 | 0.01608863 | -1.132072731 |
| HSD11B2 | -1.513508749 | 3.304450431 | -3.643656361 | 0.001444445 | 0.016115748 | -1.134805275 |
| TCEA3 | -0.872172452 | 6.333676011 | -3.643188649 | 0.001446072 | 0.016124015 | -1.135862076 |
| IBSP | -5.083394422 | #NAME? | -4.592336736 | 0.002649117 | 0.022201313 | -1.138344382 |
| ATXN7L3 | 0.734821746 | 4.973323168 | 3.641906111 | 0.001450545 | 0.016163974 | -1.138759844 |
| ARHGAP24 | 1.127563453 | 4.110047426 | 3.641185066 | 0.001453065 | 0.016182144 | -1.14038888 |
| CLIC6 | 1.370207071 | 6.738139273 | 3.640483663 | 0.001455521 | 0.016189666 | -1.141973475 |
| VEZF1 | 0.733260007 | 5.074425867 | 3.639696241 | 0.001458283 | 0.016210472 | -1.143752327 |
| BAIAP2 | 0.897482516 | 6.450101843 | 3.639245184 | 0.001459867 | 0.016218172 | -1.144771264 |
| MYO1E | 0.929067016 | 3.511526899 | 3.638911866 | 0.001461039 | 0.016221282 | -1.145524213 |
| ADIRF | -1.369118466 | 7.456093741 | -3.637743748 | 0.001465154 | 0.016257037 | -1.14816282 |
| DRAM2 | 0.748386084 | 5.839292506 | 3.636550641 | 0.001469368 | 0.01625786 | -1.150857688 |
| SYNM | -1.576566907 | 1.393714691 | -3.636491222 | 0.001469578 | 0.01625786 | -1.150991891 |
| LMNB1 | 2.059616581 | 4.3312771 | 3.636384856 | 0.001469954 | 0.01625786 | -1.151232131 |
| TRAFD1 | 0.804518158 | 5.586647178 | 3.636068654 | 0.001471074 | 0.01625786 | -1.151946298 |
| VANGL1 | 0.93471652 | 2.823951243 | 3.635952312 | 0.001471486 | 0.01625786 | -1.152209063 |
| GARNL3 | -0.904277679 | 2.081845671 | -3.634254277 | 0.001477512 | 0.016314536 | -1.156043955 |
| CEPT1 | 0.734776572 | 5.176730429 | 3.632380833 | 0.00148419 | 0.016368392 | -1.160274559 |
| BLNK | 0.953960573 | 3.225813906 | 3.629365053 | 0.001495001 | 0.016467654 | -1.167083806 |
| SCGB3A1 | -5.236991861 | 3.615385917 | -3.628318123 | 0.001498773 | 0.016499202 | -1.169447362 |
| SLC27A2 | 2.296718745 | 6.458307734 | 3.627946119 | 0.001500115 | 0.016503989 | -1.170287163 |
| GNAI2 | 0.684955124 | 7.318575715 | 3.626646511 | 0.001504814 | 0.016525691 | -1.1732209 |
| GPR85 | 1.304860346 | -0.230872909 | 3.625689924 | 0.001508282 | 0.016547914 | -1.175380154 |
| FNDC3B | 0.94490876 | 4.259693728 | 3.625163237 | 0.001510194 | 0.016547914 | -1.176568967 |
| NCBP1 | 0.862537462 | 3.951246563 | 3.624623701 | 0.001512156 | 0.016547914 | -1.177786743 |
| SLC44A4 | 1.521345928 | 7.866197556 | 3.624439177 | 0.001512828 | 0.016547914 | -1.178203219 |
| SOWAHB | 1.204055533 | 2.361609167 | 3.624226971 | 0.0015136 | 0.016547914 | -1.178682169 |
| SLX4 | 0.845882063 | 2.401388574 | 3.624186981 | 0.001513746 | 0.016547914 | -1.178772428 |
| CENPQ | 0.894776649 | 2.953262963 | 3.624085147 | 0.001514117 | 0.016547914 | -1.179002264 |
| INSYN2B | -2.740928966 | #NAME? | -3.659349707 | 0.001573116 | 0.016848466 | -1.181824814 |
| C16orf74 | 1.655516512 | 4.431845834 | 3.622031579 | 0.001521616 | 0.016589997 | -1.183636827 |
| TNNI3K | -2.105628149 | #NAME? | -3.835146503 | 0.001853057 | 0.01838499 | -1.187508593 |
| ETV3 | 1.108435035 | 4.296846868 | 3.620302435 | 0.001527959 | 0.016639203 | -1.187538784 |
| NFKBIE | 0.655421852 | 4.019142086 | 3.618882738 | 0.001533187 | 0.016686137 | -1.190742147 |
| CPSF2 | 0.802120852 | 3.018541928 | 3.618605845 | 0.001534208 | 0.016687268 | -1.191366888 |
| EDARADD | 1.76610103 | 4.203423888 | 3.618030536 | 0.001536333 | 0.01670039 | -1.192664901 |
| LTF | -5.248405238 | 8.702531271 | -3.617752641 | 0.00153736 | 0.016701574 | -1.193291871 |
| IQANK1 | 1.201508457 | 5.095299283 | 3.617138913 | 0.001539632 | 0.016716263 | -1.194676492 |
| KIF18A | 2.363273524 | 0.95899121 | 3.615730725 | 0.001544855 | 0.016762972 | -1.197853287 |
| GPER1 | -1.501508824 | 0.890177165 | -3.615105807 | 0.001547179 | 0.016768178 | -1.199262984 |
| FAAH2 | 0.863989128 | 4.55246446 | 3.61461135 | 0.00154902 | 0.016772875 | -1.200378346 |
| TULP4 | 0.711597552 | 2.492145567 | 3.614494103 | 0.001549457 | 0.016772875 | -1.200642818 |
| CYRIB | 0.973821185 | 5.357636269 | 3.613320281 | 0.001553838 | 0.016783482 | -1.203290496 |
| PCDH20 | 2.322222332 | 2.213954205 | 3.613161384 | 0.001554432 | 0.016783482 | -1.20364889 |
| UPF1 | 0.812980864 | 6.25984591 | 3.612995617 | 0.001555052 | 0.016783482 | -1.204022777 |
| THRAP3 | 0.782277201 | 5.90019961 | 3.612638687 | 0.001556387 | 0.016787933 | -1.204827818 |
| MAIP1 | 0.588463234 | 4.448227595 | 3.611835536 | 0.001559396 | 0.016800461 | -1.206639226 |
| MAFG | 0.718518876 | 3.76187823 | 3.610419422 | 0.001564716 | 0.016832654 | -1.209832884 |
| SNX7 | 1.122061158 | 6.013822447 | 3.609916342 | 0.00156661 | 0.016832654 | -1.210967378 |
| MARCHF4 | 2.682858631 | -1.397541064 | 3.609805388 | 0.001567028 | 0.016832654 | -1.211217584 |
| CASP9 | 0.692858613 | 4.707575972 | 3.609745333 | 0.001567254 | 0.016832654 | -1.21135301 |
| ANGPTL7 | -4.259122595 | #NAME? | -4.077448717 | 0.002293244 | 0.020642632 | -1.211668331 |
| MUSTN1 | -1.651678552 | 4.185568499 | -3.609494612 | 0.001568199 | 0.016832654 | -1.211918393 |
| RPGRIP1L | 1.286811321 | 2.959869391 | 3.60828576 | 0.001572765 | 0.016848466 | -1.21464426 |
| HIPK1 | 1.020368782 | 5.166233837 | 3.60780942 | 0.001574567 | 0.016853409 | -1.215718313 |
| APOD | -1.88444656 | 7.034942956 | -3.607581193 | 0.001575431 | 0.016853409 | -1.21623291 |
| HAPLN2 | -2.076201478 | -2.369912438 | -3.606944701 | 0.001577844 | 0.016853864 | -1.217668009 |
| SLC43A2 | 1.268637184 | 4.472121865 | 3.606516471 | 0.00157947 | 0.016853864 | -1.218633508 |
| PLN | -3.944577684 | -0.241518175 | -3.606160772 | 0.001580821 | 0.016853864 | -1.219435455 |
| DHX9 | 0.827864512 | 5.800789338 | 3.606153169 | 0.00158085 | 0.016853864 | -1.219452596 |
| TMEM19 | 0.685239878 | 3.536726861 | 3.60610466 | 0.001581034 | 0.016853864 | -1.219561963 |
| LIMK2 | 0.74499178 | 6.378183827 | 3.605703986 | 0.001582558 | 0.016860225 | -1.220465288 |
| ADM | 1.931130301 | 5.358619846 | 3.604656928 | 0.001586547 | 0.016864997 | -1.222825789 |
| H3-2 | 1.256010756 | 2.593199689 | 3.604460024 | 0.001587298 | 0.016864997 | -1.223269676 |
| JOSD2 | 1.189041337 | 5.87575088 | 3.604448454 | 0.001587343 | 0.016864997 | -1.223295759 |
| PUS10 | 0.976455955 | 2.049939949 | 3.60362693 | 0.001590481 | 0.016881247 | -1.225147685 |
| GPR180 | 0.945208391 | 2.303586285 | 3.603240942 | 0.001591957 | 0.016881247 | -1.22601777 |
| CNOT7 | 0.678219902 | 5.539616062 | 3.602601578 | 0.001594406 | 0.016897361 | -1.227458961 |
| IGFBP2 | 1.651005183 | 9.034137431 | 3.601771267 | 0.001597592 | 0.016920319 | -1.229330485 |
| MAN2A1 | 0.836952495 | 3.874558803 | 3.60142569 | 0.00159892 | 0.016920319 | -1.230109388 |
| SNAPC1 | 0.877157291 | 4.217602349 | 3.601229004 | 0.001599676 | 0.016920319 | -1.230552695 |
| TMEM87B | 0.870027825 | 4.668784839 | 3.600685815 | 0.001601766 | 0.016920319 | -1.231776952 |
| SLC38A7 | 0.593952017 | 3.145811816 | 3.60061695 | 0.001602031 | 0.016920319 | -1.231932159 |
| GTF2H3 | 0.810311696 | 4.668882041 | 3.600584809 | 0.001602155 | 0.016920319 | -1.232004599 |
| PLK4 | 2.250478389 | 2.247259489 | 3.598680531 | 0.001609505 | 0.016968386 | -1.236296174 |
| NIPSNAP3A | 0.622845615 | 5.027615494 | 3.597199001 | 0.001615247 | 0.016997544 | -1.239634674 |
| ATP5F1B | 0.694639884 | 9.20954514 | 3.597108492 | 0.001615598 | 0.016997544 | -1.239838619 |
| CDC42SE1 | 1.045519931 | 6.448083148 | 3.596810269 | 0.001616757 | 0.016997544 | -1.240510599 |
| GNG7 | -1.32094636 | 2.266035652 | -3.596477402 | 0.001618051 | 0.016997958 | -1.241260627 |
| HS3ST5 | 1.441535202 | -3.129775662 | 3.596271153 | 0.001618853 | 0.016997958 | -1.241725347 |
| VDAC1 | 0.621218363 | 7.573714269 | 3.595977727 | 0.001619995 | 0.017000134 | -1.242386482 |
| SMS | 0.617928587 | 7.086735047 | 3.595397037 | 0.001622258 | 0.017014058 | -1.243694837 |
| CDK19 | 0.88643465 | 2.818729927 | 3.594830706 | 0.001624467 | 0.01701949 | -1.244970792 |
| ZBTB12 | 1.043006166 | 2.546902725 | 3.594784562 | 0.001624647 | 0.01701949 | -1.245074753 |
| MYH11 | -3.230771616 | 2.931219477 | -3.594276974 | 0.00162663 | 0.017030454 | -1.246218319 |
| WDR45B | 0.646534462 | 6.849498579 | 3.593587728 | 0.001629327 | 0.017048871 | -1.247771092 |
| FBXO32 | 0.776664358 | 4.385824407 | 3.593234514 | 0.00163071 | 0.017053536 | -1.248566807 |
| CAND1 | 0.681449146 | 4.226551205 | 3.59287665 | 0.001632113 | 0.017058399 | -1.249372981 |
| SLCO1A2 | -2.195146776 | -0.487285705 | -3.592133895 | 0.001635029 | 0.017079057 | -1.251046153 |
| C4orf33 | 0.692132591 | 4.29035008 | 3.591875561 | 0.001636044 | 0.017079853 | -1.251628072 |
| UNG | 0.957188389 | 4.837119854 | 3.591318847 | 0.001638234 | 0.017092904 | -1.252882088 |
| C12orf75 | 1.774864529 | 6.108614873 | 3.590507636 | 0.001641431 | 0.017116435 | -1.254709289 |
| SETDB2-PHF11 | 3.761644333 | #NAME? | 3.865856228 | 0.002295188 | 0.020643071 | -1.257222214 |
| VPS35L | 0.605150828 | 4.644789878 | 3.588971195 | 0.001647502 | 0.017155739 | -1.25816977 |
| MTREX | 0.788467934 | 4.898596956 | 3.588837726 | 0.00164803 | 0.017155739 | -1.25847036 |
| TRADD | 0.713100594 | 6.483754463 | 3.587957775 | 0.001651518 | 0.017182213 | -1.260452082 |
| VPS8 | 0.746839429 | 3.822989364 | 3.586999432 | 0.001655325 | 0.017196681 | -1.262610225 |
| CLDND1 | 0.813956309 | 5.975397276 | 3.586893705 | 0.001655746 | 0.017196681 | -1.26284831 |
| UTP14C | 2.205255449 | 1.75661882 | 3.585453464 | 0.001661484 | 0.017246436 | -1.266091399 |
| ARHGAP35 | 0.716575878 | 4.145637047 | 3.584576658 | 0.001664988 | 0.017272942 | -1.26806562 |
| ALDH16A1 | 0.65833208 | 5.3936274 | 3.584171688 | 0.001666608 | 0.017279896 | -1.268977415 |
| DARS2 | 1.037736266 | 2.994037047 | 3.583550876 | 0.001669096 | 0.0172906 | -1.270375137 |
| PCSK5 | 1.283619364 | 3.734408148 | 3.583439498 | 0.001669542 | 0.0172906 | -1.270625891 |
| WDR12 | 0.699537081 | 2.821669649 | 3.582757136 | 0.001672281 | 0.017291824 | -1.272162116 |
| UBQLN2 | 0.588737388 | 4.318617399 | 3.582422193 | 0.001673627 | 0.017293511 | -1.27291616 |
| GPD2 | 0.87836827 | 4.170166672 | 3.581105506 | 0.001678928 | 0.017338048 | -1.275880212 |
| MTMR11 | 0.850355157 | 3.297043328 | 3.580878541 | 0.001679844 | 0.017338048 | -1.276391119 |
| CEACAM6 | 2.066951689 | 6.292697563 | 3.580447715 | 0.001681583 | 0.017345564 | -1.277360901 |
| PARG | 0.789049764 | 3.736855985 | 3.580072755 | 0.001683098 | 0.017345564 | -1.278204912 |
| MFSD1 | 0.641490406 | 6.553986786 | 3.579989804 | 0.001683433 | 0.017345564 | -1.278391626 |
| MKRN1 | 0.609454721 | 6.539737993 | 3.579507834 | 0.001685383 | 0.017355822 | -1.27947647 |
| PIK3R6 | 1.868921599 | 1.641363643 | 3.578707202 | 0.001688627 | 0.017379386 | -1.281278506 |
| NLRX1 | 0.742858969 | 3.719539925 | 3.578029826 | 0.001691376 | 0.017388131 | -1.28280305 |
| ZMYND8 | 0.727053489 | 5.029311311 | 3.577973112 | 0.001691607 | 0.017388131 | -1.282930689 |
| TWF1 | 0.858928015 | 6.196441272 | 3.577791394 | 0.001692345 | 0.017388131 | -1.283339664 |
| LAYN | 1.189724666 | 4.992972815 | 3.57702101 | 0.001695479 | 0.017394281 | -1.285073431 |
| KLHL5 | 0.96646514 | 3.923961031 | 3.576938969 | 0.001695813 | 0.017394281 | -1.28525806 |
| BAG5 | 0.646051516 | 4.422642089 | 3.575340357 | 0.001702336 | 0.017423895 | -1.288855484 |
| CBR3 | -1.537367653 | 4.810879521 | -3.575307768 | 0.001702469 | 0.017423895 | -1.288928817 |
| BICD2 | 1.066857279 | 4.206796966 | 3.575292162 | 0.001702533 | 0.017423895 | -1.288963933 |
| YIPF5 | 0.589321024 | 5.230979568 | 3.574724579 | 0.001704855 | 0.017424294 | -1.290241097 |
| CCDC142 | 0.602157078 | 3.010149839 | 3.574580159 | 0.001705446 | 0.017424294 | -1.290566061 |
| FGF22 | -2.266848444 | #NAME? | -3.590687954 | 0.001735973 | 0.017579769 | -1.291564496 |
| ISY1-RAB43 | 0.790722474 | 4.255739572 | 3.573723221 | 0.001708959 | 0.017450381 | -1.292494219 |
| RNF17 | 1.72677144 | -1.057130595 | 3.57245476 | 0.001714172 | 0.017476734 | -1.295348136 |
| TMEM260 | 0.718777144 | 4.253377987 | 3.572424731 | 0.001714295 | 0.017476734 | -1.295415695 |
| TTC30B | 1.67985223 | 3.291670143 | 3.571879018 | 0.001716543 | 0.017488545 | -1.296643423 |
| NMT1 | 0.597232524 | 5.214973577 | 3.571237005 | 0.001719191 | 0.017505716 | -1.298087748 |
| CFTR | 1.579106143 | 2.806438122 | 3.570216459 | 0.001723409 | 0.017529031 | -1.300383532 |
| TENM1 | -3.179656529 | #NAME? | -3.586036771 | 0.001755135 | 0.017722863 | -1.301865774 |
| TCF4 | 0.914083829 | 4.559855704 | 3.569147891 | 0.001727835 | 0.017563663 | -1.302787181 |
| SYNGAP1 | 1.560855659 | 2.660208648 | 3.568705615 | 0.001729671 | 0.017563663 | -1.303781995 |
| TOMM34 | 0.793308625 | 5.25253932 | 3.568463475 | 0.001730677 | 0.017563663 | -1.304326629 |
| PLA2G15 | 0.596752878 | 3.590182108 | 3.567452996 | 0.00173488 | 0.017579769 | -1.306599361 |
| GRIN2C | -0.87505411 | -0.677444553 | -3.567178138 | 0.001736025 | 0.017579769 | -1.307217536 |
| TNFRSF10C | 1.734781425 | 1.288389665 | 3.567152835 | 0.00173613 | 0.017579769 | -1.307274443 |
| TTC30A | 1.910921634 | 2.990379836 | 3.565695825 | 0.001742213 | 0.017631544 | -1.310551173 |
| LRRC74A | -2.010179651 | #NAME? | -3.769013495 | 0.002110016 | 0.01964811 | -1.310971801 |
| YWHAZ | 0.816644447 | 8.327989184 | 3.565086183 | 0.001744764 | 0.017647542 | -1.311922129 |
| EHBP1L1 | 0.781331775 | 6.244082175 | 3.562159499 | 0.001757063 | 0.017724572 | -1.318502874 |
| ADSL | 0.672578533 | 5.620567342 | 3.562114481 | 0.001757253 | 0.017724572 | -1.318604089 |
| ZMPSTE24 | 0.772541734 | 5.261148037 | 3.56044423 | 0.001764311 | 0.017785897 | -1.322359131 |
| TMEM184A | 1.069948814 | 4.576052343 | 3.559773468 | 0.001767153 | 0.017804679 | -1.323867018 |
| BNIP3L | 0.719963581 | 5.694750544 | 3.558680738 | 0.001771793 | 0.017841543 | -1.326323356 |
| CDK15 | 1.791299733 | -0.009043747 | 3.554585944 | 0.001789287 | 0.01798782 | -1.335526441 |
| TMEM68 | 0.867759556 | 4.949760534 | 3.554264395 | 0.001790667 | 0.017991756 | -1.33624902 |
| RELL1 | 0.585168819 | 4.042997186 | 3.554030342 | 0.001791673 | 0.017991921 | -1.33677497 |
| GABPB2 | 0.64823415 | 3.894473012 | 3.552299552 | 0.001799128 | 0.018038954 | -1.34066405 |
| HES2 | 1.901979195 | 2.825748631 | 3.552246014 | 0.001799359 | 0.018038954 | -1.340784342 |
| GANAB | 0.6893554 | 7.041654241 | 3.552022435 | 0.001800324 | 0.018038954 | -1.341286688 |
| PNPLA6 | 0.596356535 | 5.183941361 | 3.550358998 | 0.001807523 | 0.018081191 | -1.345023939 |
| BRCA1 | 1.589812948 | 2.391671704 | 3.549374451 | 0.001811796 | 0.018113979 | -1.347235733 |
| SETD7 | 0.687582253 | 3.923697671 | 3.548653738 | 0.001814931 | 0.018135349 | -1.348854727 |
| NFE2 | 2.226364537 | 1.630786974 | 3.548233933 | 0.001816759 | 0.01814365 | -1.349797735 |
| PIGR | -1.418486119 | 9.755219808 | -3.547813453 | 0.001818593 | 0.018151989 | -1.350742229 |
| BEX2 | -0.914919985 | 4.791555986 | -3.545668218 | 0.001827973 | 0.018235613 | -1.355560516 |
| PPP1R9B | 0.868996445 | 4.632808081 | 3.544602815 | 0.00183265 | 0.018272242 | -1.357953201 |
| NNT | 0.914785511 | 4.351371093 | 3.543908109 | 0.001835705 | 0.018282661 | -1.359513281 |
| CTR9 | 0.713598467 | 4.966161298 | 3.543249833 | 0.001838605 | 0.018291509 | -1.360991486 |
| FAM189B | 0.636195075 | 3.706958448 | 3.542227221 | 0.00184312 | 0.018326392 | -1.363287702 |
| MFSD2A | 1.495785655 | 5.10655689 | 3.540870671 | 0.001849124 | 0.018365666 | -1.366333514 |
| CAP1 | 1.182726518 | 6.79074299 | 3.540709354 | 0.00184984 | 0.018365666 | -1.366695696 |
| DHX32 | 0.912681557 | 5.630271684 | 3.538134196 | 0.001861296 | 0.018446611 | -1.372476778 |
| LDB3 | -1.306968987 | 0.797683595 | -3.537617476 | 0.001863603 | 0.018453453 | -1.373636664 |
| SLC4A4 | 2.389017834 | 2.911511618 | 3.537525142 | 0.001864016 | 0.018453453 | -1.373843924 |
| RAN | 0.918395407 | 7.181722039 | 3.537086168 | 0.001865979 | 0.018462832 | -1.374829255 |
| GNA13 | 0.866441262 | 4.207393634 | 3.536739583 | 0.00186753 | 0.018468131 | -1.375607187 |
| MYOZ3 | -1.285663028 | -0.005444761 | -3.535646182 | 0.001872431 | 0.018506538 | -1.378061277 |
| MAMDC4 | 0.958677333 | 2.504246159 | 3.534660063 | 0.001876862 | 0.01853555 | -1.38027442 |
| MRPL19 | 0.683145694 | 3.106646355 | 3.534539501 | 0.001877405 | 0.01853555 | -1.380544989 |
| TES | 0.95416729 | 5.493087088 | 3.533225416 | 0.001883328 | 0.018573858 | -1.383493932 |
| EIF4G1 | 0.718529772 | 6.802099297 | 3.532625014 | 0.00188604 | 0.018578446 | -1.384841209 |
| POLR2D | 0.600875379 | 4.024408245 | 3.531571774 | 0.001890807 | 0.018578446 | -1.387204503 |
| UQCRC2 | 0.623272721 | 7.326263354 | 3.531571085 | 0.00189081 | 0.018578446 | -1.387206048 |
| RASL12 | -1.814164798 | 2.107668838 | -3.53153606 | 0.001890969 | 0.018578446 | -1.387284637 |
| NPM1 | 0.736208212 | 9.483269624 | 3.531450989 | 0.001891354 | 0.018578446 | -1.387475514 |
| BICD1 | 1.107086872 | 1.842247042 | 3.531151692 | 0.001892711 | 0.018578446 | -1.38814705 |
| DUSP3 | 0.6794311 | 4.541240311 | 3.530865846 | 0.001894008 | 0.018578446 | -1.388788393 |
| NIPSNAP1 | 0.657788748 | 5.300595607 | 3.530335477 | 0.001896417 | 0.018581255 | -1.389978331 |
| SHKBP1 | 0.679311136 | 5.426064343 | 3.530273002 | 0.001896701 | 0.018581255 | -1.390118497 |
| DLG1 | 1.137009404 | 5.006177975 | 3.530128121 | 0.00189736 | 0.018581255 | -1.390443543 |
| STXBP3 | 0.636762997 | 5.532668342 | 3.529795867 | 0.001898871 | 0.018586048 | -1.391188958 |
| PSD3 | 1.045835329 | 2.506714521 | 3.528747523 | 0.001903648 | 0.018602764 | -1.393540815 |
| GPD1L | 0.851297702 | 4.863866236 | 3.527437591 | 0.001909633 | 0.018651228 | -1.396479281 |
| CYBC1 | 0.622502085 | 6.366417931 | 3.526918885 | 0.001912008 | 0.0186644 | -1.39764278 |
| GOLPH3L | 0.702202048 | 5.260356359 | 3.526306517 | 0.001914816 | 0.018671763 | -1.399016317 |
| RNF20 | 0.647423082 | 4.783734575 | 3.525377406 | 0.001919083 | 0.018703348 | -1.401100197 |
| FADS3 | -1.096512511 | 3.886858529 | -3.524695921 | 0.001922219 | 0.018723878 | -1.402628599 |
| ELF1 | 1.144677333 | 5.159102911 | 3.52415219 | 0.001924725 | 0.018738249 | -1.403848001 |
| YDJC | 0.666999982 | 4.483565933 | 3.523151899 | 0.001929343 | 0.01877316 | -1.40609119 |
| ATF1 | 0.753657642 | 4.38497651 | 3.522817722 | 0.001930889 | 0.018778149 | -1.40684056 |
| HSP90AA1 | 1.064964731 | 9.328735945 | 3.521944781 | 0.001934931 | 0.018802901 | -1.408797993 |
| ARL11 | 1.060820429 | 1.815287601 | 3.521821674 | 0.001935502 | 0.018802901 | -1.409074032 |
| MBTPS2 | 0.708115042 | 2.704491547 | 3.521157904 | 0.001938582 | 0.018822769 | -1.410562338 |
| FOXE1 | 2.783422682 | 2.542725162 | 3.519914968 | 0.001944362 | 0.018868822 | -1.413349073 |
| CDO1 | -2.515683315 | 1.020882125 | -3.519428477 | 0.001946629 | 0.018880748 | -1.414439748 |
| RASSF6 | 1.429041182 | 4.302537514 | 3.518795695 | 0.001949582 | 0.018899308 | -1.415858341 |
| ERVFRD-1 | 2.32921142 | -2.380635342 | 3.518259156 | 0.001952089 | 0.018907232 | -1.417061123 |
| TMEM30A | 0.64525798 | 6.40607222 | 3.517999751 | 0.001953303 | 0.018907232 | -1.417642627 |
| SMIM11A | 0.934420393 | 4.929432622 | 3.51729618 | 0.001956597 | 0.018916892 | -1.419219759 |
| UQCC2 | 0.605400564 | 5.173506791 | 3.515425426 | 0.001965383 | 0.018988137 | -1.423412882 |
| UBA6 | 0.982852415 | 3.776365837 | 3.515282896 | 0.001966054 | 0.018988137 | -1.423732327 |
| NARF | 0.626377919 | 6.229912673 | 3.514365952 | 0.001970376 | 0.019019779 | -1.425787352 |
| OAS1 | 1.303320961 | 5.781356486 | 3.514069687 | 0.001971775 | 0.019023181 | -1.426451304 |
| PRKCG | 2.514744556 | #NAME? | 3.523230226 | 0.002294004 | 0.020642632 | -1.427980019 |
| FAM149B1 | 0.802634332 | 3.873219228 | 3.511522208 | 0.00198384 | 0.019119296 | -1.432159826 |
| DOC2B | 1.690462504 | 3.622852203 | 3.510735026 | 0.001987583 | 0.019135087 | -1.433923578 |
| C1orf131 | 0.652700925 | 4.40648347 | 3.509013208 | 0.001995793 | 0.019193813 | -1.437781128 |
| GTF2H2C_2 | 2.262307278 | 2.034479531 | 3.508600862 | 0.001997765 | 0.019194219 | -1.438704876 |
| SMAD9 | -1.323107709 | 2.04971814 | -3.508477997 | 0.001998352 | 0.019194219 | -1.438980115 |
| ARHGAP23 | 1.318216689 | 4.94764279 | 3.508261757 | 0.001999387 | 0.019194219 | -1.439464529 |
| VBP1 | 0.63542564 | 5.536003538 | 3.508121772 | 0.002000058 | 0.019194219 | -1.439778112 |
| GPX1 | 0.870818377 | 9.234235209 | 3.507651711 | 0.00200231 | 0.019202271 | -1.440831086 |
| SEPTIN2 | 0.613141399 | 7.731427526 | 3.507505987 | 0.002003008 | 0.019202271 | -1.441157512 |
| TP53BP1 | 0.932122219 | 3.940100609 | 3.50718612 | 0.002004543 | 0.019206856 | -1.441874014 |
| ACLY | 0.890632017 | 5.208678598 | 3.506545713 | 0.002007618 | 0.019226195 | -1.443308474 |
| GREB1L | -0.804026747 | -1.066550665 | -3.506287396 | 0.00200886 | 0.019227171 | -1.443887064 |
| KIAA1217 | 0.924874535 | 5.240674946 | 3.506084782 | 0.002009835 | 0.019227171 | -1.444340881 |
| ATP8B3 | 1.853138594 | -0.311422547 | 3.505672037 | 0.002011821 | 0.019236059 | -1.445265333 |
| DPH3 | 0.692033722 | 3.50568084 | 3.50463521 | 0.002016821 | 0.019266421 | -1.447587462 |
| LCOR | 1.008303069 | 3.330987638 | 3.504574129 | 0.002017116 | 0.019266421 | -1.447724256 |
| PLD4 | 1.512013627 | 4.005846099 | 3.503900605 | 0.00202037 | 0.019271334 | -1.449232618 |
| NR2F6 | 0.766702324 | 6.473866479 | 3.503268442 | 0.00202343 | 0.019271334 | -1.450648284 |
| PLP2 | 1.235956566 | 6.890505814 | 3.502371562 | 0.002027778 | 0.019287224 | -1.452656649 |
| LGALS9B | 2.26172373 | 4.524641164 | 3.501157317 | 0.00203368 | 0.019323144 | -1.45537548 |
| DDX52 | 0.630723905 | 3.493622828 | 3.500664148 | 0.002036081 | 0.019335862 | -1.456479672 |
| TMEM72 | -2.905544606 | #NAME? | -3.722264916 | 0.002975051 | 0.023878087 | -1.456618635 |
| PIK3R2 | 0.853350378 | 5.125748011 | 3.500330551 | 0.002037708 | 0.019337953 | -1.457226567 |
| SCRN1 | 0.986984684 | 4.499266242 | 3.499855949 | 0.002040023 | 0.019337953 | -1.458289127 |
| FAM120A | 0.795171133 | 5.884056527 | 3.499832829 | 0.002040136 | 0.019337953 | -1.458340888 |
| DCP2 | 0.823161266 | 3.482214032 | 3.499747091 | 0.002040555 | 0.019337953 | -1.458532838 |
| HNRNPR | 0.80492914 | 6.703294308 | 3.499405985 | 0.002042221 | 0.019343665 | -1.459296494 |
| NSMCE1 | 0.703852129 | 6.712457184 | 3.498820802 | 0.002045083 | 0.019350615 | -1.460606538 |
| MRPS6 | 1.134593061 | 7.320214245 | 3.498453083 | 0.002046884 | 0.019351549 | -1.46142972 |
| DCLRE1A | 0.781468876 | 2.584457043 | 3.498366035 | 0.00204731 | 0.019351549 | -1.461624582 |
| SYT17 | 1.33566839 | 3.673330784 | 3.498034463 | 0.002048935 | 0.019356848 | -1.462366821 |
| CYP2S1 | 2.426153463 | 5.879145794 | 3.497648514 | 0.002050828 | 0.019364674 | -1.463230764 |
| LAMC2 | 1.729170436 | 4.998692157 | 3.497274833 | 0.002052663 | 0.019371939 | -1.464067221 |
| CXCR2 | 1.358071632 | 2.008620463 | 3.496777472 | 0.002055107 | 0.019384948 | -1.465180492 |
| SYNJ2BP | 0.708394087 | 3.871773627 | 3.496430456 | 0.002056814 | 0.019389171 | -1.465957214 |
| DNM2 | 0.635115455 | 6.081123084 | 3.49610002 | 0.002058441 | 0.019389171 | -1.466696807 |
| FMO4 | 0.88871703 | 3.29669678 | 3.496036638 | 0.002058753 | 0.019389171 | -1.46683867 |
| A4GALT | 1.239170019 | 7.152542097 | 3.494835594 | 0.002064678 | 0.019434904 | -1.469526729 |
| ZNF561 | 0.937838554 | 3.924365943 | 3.494291942 | 0.002067365 | 0.019442544 | -1.470743401 |
| NEK3 | -0.679333895 | 4.294838684 | -3.49402282 | 0.002068697 | 0.019442544 | -1.471345669 |
| ADGRB2 | 1.692985089 | 1.800241917 | 3.493561929 | 0.002070979 | 0.019453941 | -1.472377069 |
| NCEH1 | 1.042840467 | 2.696053926 | 3.493178735 | 0.002072879 | 0.019458833 | -1.47323457 |
| PRB4 | -4.928457507 | #NAME? | -3.525264736 | 0.002145787 | 0.01988954 | -1.473512226 |
| UGT1A8 | 2.724320169 | 3.200548661 | 3.492898039 | 0.002074271 | 0.019458833 | -1.473862688 |
| OSCAR | 1.395337834 | 1.98868633 | 3.492240493 | 0.002077537 | 0.0194753 | -1.475334042 |
| HABP2 | 3.291394419 | -0.706154209 | 3.491789981 | 0.002079777 | 0.01947648 | -1.476342085 |
| SFXN5 | 0.736645418 | 2.91084199 | 3.491784455 | 0.002079804 | 0.01947648 | -1.47635445 |
| PTGS1 | 1.459077987 | 2.7180707 | 3.491474952 | 0.002081345 | 0.019480874 | -1.477046959 |
| MTARC2 | -0.773897925 | 4.140917185 | -3.489714627 | 0.002090128 | 0.019533915 | -1.480985379 |
| G3BP2 | 0.85738192 | 5.664258477 | 3.489693326 | 0.002090234 | 0.019533915 | -1.481033032 |
| BRF2 | -0.646406894 | 4.363633409 | -3.488330525 | 0.002097059 | 0.019587628 | -1.484081713 |
| SCN4A | -3.24204121 | #NAME? | -3.538862853 | 0.002214228 | 0.020296348 | -1.484603579 |
| KRT40 | 2.906704294 | 2.428728243 | 3.487145515 | 0.002103011 | 0.019616312 | -1.486732417 |
| FAM193A | 0.634031188 | 3.72251521 | 3.486064989 | 0.002108452 | 0.019643605 | -1.489149208 |
| MYO1B | 1.051251831 | 4.797378925 | 3.484567567 | 0.002116016 | 0.019693898 | -1.492498148 |
| ATXN2 | 0.685598715 | 3.678168704 | 3.481247344 | 0.002132883 | 0.019823719 | -1.499922424 |
| IREB2 | 0.891361206 | 4.189621646 | 3.481232847 | 0.002132957 | 0.019823719 | -1.499954838 |
| THAP2 | 0.748424936 | 1.36774959 | 3.481112602 | 0.00213357 | 0.019823719 | -1.500223681 |
| CTSD | 0.643721799 | 9.439915417 | 3.480964597 | 0.002134325 | 0.019823719 | -1.500554587 |
| KCTD5 | 0.662333913 | 4.519094506 | 3.478876895 | 0.002145005 | 0.01988954 | -1.505221834 |
| SMIM10L2A | -0.976732391 | 0.239342194 | -3.478418399 | 0.002147358 | 0.019893534 | -1.506246749 |
| AP5M1 | 0.711530431 | 2.758203316 | 3.478214382 | 0.002148405 | 0.019893534 | -1.506702793 |
| SRGAP2C | 0.887253809 | 2.353946784 | 3.476961389 | 0.00215485 | 0.019922779 | -1.509503495 |
| TMEM229B | 1.047179112 | 3.446450455 | 3.475658231 | 0.002161573 | 0.019974782 | -1.512416051 |
| STBD1 | 0.675022383 | 3.254602404 | 3.472659322 | 0.002177123 | 0.020098049 | -1.519117548 |
| SESN2 | 0.849922954 | 3.022581508 | 3.47244267 | 0.00217825 | 0.020098256 | -1.51960163 |
| ADCY8 | -3.762811182 | #NAME? | -4.497212536 | 0.004377328 | 0.029960888 | -1.51978341 |
| ALPK2 | 3.589185203 | -0.746666192 | 3.47076456 | 0.002187004 | 0.020165427 | -1.523350902 |
| UCP2 | 1.282616444 | 7.228719843 | 3.470622139 | 0.002187748 | 0.020165427 | -1.523669082 |
| MT1E | 1.040384068 | 7.868148739 | 3.469742146 | 0.002192354 | 0.020187414 | -1.525634975 |
| TNKS1BP1 | 0.588773326 | 5.764006745 | 3.467826887 | 0.00220241 | 0.020228803 | -1.529913197 |
| LOC102723996 | 3.366792665 | #NAME? | 3.455178886 | 0.002522496 | 0.021731677 | -1.53083421 |
| EIF4EBP1 | -1.091806605 | 5.203451468 | -3.466032502 | 0.002211873 | 0.020295216 | -1.533920861 |
| ITGB8 | 1.234581123 | 3.852155802 | 3.465766821 | 0.002213277 | 0.020296348 | -1.534514201 |
| PAEP | -1.963809716 | #NAME? | -3.761175894 | 0.003222609 | 0.025034756 | -1.534567446 |
| TMEM210 | -1.828127134 | #NAME? | -3.514433983 | 0.002340135 | 0.020889378 | -1.536566824 |
| DPP3 | 0.824108815 | 5.40314562 | 3.464219519 | 0.002221474 | 0.020335232 | -1.53796952 |
| TP53INP1 | 1.046287286 | 4.769540064 | 3.46418807 | 0.002221641 | 0.020335232 | -1.538039746 |
| RNF112 | -0.937493476 | -0.202511955 | -3.464043309 | 0.002222409 | 0.020335232 | -1.538362995 |
| SIGLEC10 | 1.30163582 | 3.244203437 | 3.46354291 | 0.002225068 | 0.020335232 | -1.539480347 |
| CCDC88C | 0.92722425 | 5.177435517 | 3.46340368 | 0.002225808 | 0.020335232 | -1.53979123 |
| TIAM1 | 1.627623379 | 2.086862366 | 3.46331158 | 0.002226298 | 0.020335232 | -1.539996875 |
| UBE3C | 0.796811187 | 4.793848469 | 3.462358788 | 0.00223137 | 0.020348508 | -1.542124237 |
| MMAA | 0.719105087 | 1.814423914 | 3.462198925 | 0.002232223 | 0.020348508 | -1.542481158 |
| AHCY | 0.639012984 | 6.663616289 | 3.462192167 | 0.002232259 | 0.020348508 | -1.542496246 |
| PPIP5K1 | 0.804334625 | 3.828022369 | 3.462140599 | 0.002232534 | 0.020348508 | -1.542611379 |
| HNRNPM | 0.603612295 | 7.966312906 | 3.461973611 | 0.002233424 | 0.020348508 | -1.542984202 |
| ZFHX2 | 2.357050751 | 0.821256398 | 3.461726868 | 0.002234741 | 0.020348508 | -1.543535081 |
| GAPVD1 | 0.744681797 | 4.426217338 | 3.461569134 | 0.002235583 | 0.020348508 | -1.543887233 |
| ELF4 | 1.063250241 | 3.335244911 | 3.46115361 | 0.002237803 | 0.020358525 | -1.544814897 |
| COA6 | 0.608354925 | 5.557823137 | 3.459500458 | 0.002246657 | 0.020428851 | -1.548505303 |
| IPO4 | 0.80597762 | 4.662310658 | 3.458800133 | 0.002250418 | 0.020452823 | -1.550068532 |
| TMEM145 | -2.000511905 | #NAME? | -3.472779141 | 0.002291611 | 0.020642632 | -1.551826535 |
| PXN | 0.621222908 | 6.209379259 | 3.457957883 | 0.002254949 | 0.020463326 | -1.551948447 |
| CSNK1G3 | 0.830003522 | 3.529323737 | 3.456190011 | 0.002264489 | 0.020515377 | -1.55589398 |
| NXF3 | -2.799256573 | -0.012265688 | -3.456059124 | 0.002265197 | 0.020515377 | -1.556186072 |
| RPS6KA4 | 0.830066676 | 4.388732608 | 3.45553168 | 0.002268052 | 0.020531008 | -1.557363108 |
| DCAF7 | 0.829362814 | 4.92022705 | 3.454265369 | 0.00227492 | 0.020571948 | -1.560188793 |
| GSDME | 1.220408186 | 3.79067557 | 3.454072519 | 0.002275968 | 0.020571948 | -1.5606191 |
| CHST6 | 0.907209672 | 5.227483605 | 3.45314056 | 0.002281038 | 0.020580149 | -1.562698498 |
| E2F8 | 2.071559545 | 1.554410743 | 3.453111992 | 0.002281194 | 0.020580149 | -1.562762237 |
| ADA2 | 1.270846711 | 4.684179469 | 3.453093626 | 0.002281294 | 0.020580149 | -1.562803214 |
| IL17D | -0.982510436 | 0.923508512 | -3.453073764 | 0.002281402 | 0.020580149 | -1.562847528 |
| SCOC | 0.603466023 | 6.280055487 | 3.45108999 | 0.002292233 | 0.020642632 | -1.567273236 |
| DIAPH1 | 0.927126945 | 5.188361297 | 3.450028346 | 0.00229805 | 0.020650688 | -1.56964144 |
| GRAMD4 | 0.649015294 | 4.455505632 | 3.44975165 | 0.002299569 | 0.020650688 | -1.570258634 |
| CTNNB1 | 0.694923797 | 7.618153345 | 3.44924747 | 0.002302338 | 0.020652308 | -1.571383215 |
| RBM14-RBM4 | 2.650486494 | #NAME? | 3.462529341 | 0.002347453 | 0.020919092 | -1.574359058 |
| C9orf40 | 1.099913822 | 3.234318211 | 3.446322483 | 0.002318469 | 0.020757041 | -1.577906588 |
| CEP72 | 1.322779766 | 3.179054193 | 3.446152949 | 0.002319407 | 0.020757041 | -1.57828464 |
| USP35 | 0.700397251 | 1.929019768 | 3.445970938 | 0.002320415 | 0.020757041 | -1.578690513 |
| DCLRE1B | 0.914519786 | 2.015730927 | 3.445208436 | 0.002324642 | 0.020784627 | -1.580390775 |
| LCNL1 | -2.69683309 | #NAME? | -3.493489218 | 0.002453698 | 0.021432736 | -1.581070369 |
| GRM6 | 0.860843356 | -0.420327122 | 3.444641543 | 0.002327789 | 0.020802539 | -1.581654797 |
| LRFN4 | 1.14108549 | 4.099768047 | 3.443693091 | 0.002333064 | 0.020839438 | -1.583769469 |
| ANO5 | -3.155469616 | -2.372715676 | -3.442278646 | 0.002340952 | 0.020889378 | -1.586922837 |
| MRPL39 | 0.66927303 | 5.106157466 | 3.441088031 | 0.002347612 | 0.020919092 | -1.589576929 |
| PLA2G5 | -3.254896453 | #NAME? | -3.470984142 | 0.002432233 | 0.021375618 | -1.59101404 |
| ERF | 0.638650701 | 4.934885155 | 3.440422415 | 0.002351344 | 0.020934705 | -1.591060598 |
| XRN2 | 0.745637862 | 5.586587876 | 3.440343374 | 0.002351787 | 0.020934705 | -1.591236777 |
| ST3GAL5 | -1.207794329 | 3.847233473 | -3.438184526 | 0.002363932 | 0.021022234 | -1.596048336 |
| KIFBP | 0.590557378 | 4.808239345 | 3.437734785 | 0.00236647 | 0.021034516 | -1.597050599 |
| STIL | 1.189079308 | 2.71974378 | 3.437089378 | 0.002370116 | 0.021056637 | -1.598488851 |
| KIAA0100 | 0.708536566 | 5.321551199 | 3.436015711 | 0.002376195 | 0.021100331 | -1.600881296 |
| PDE11A | -2.496924246 | -0.051560879 | -3.434642786 | 0.00238399 | 0.021159216 | -1.603940285 |
| MRPL35 | 0.614179619 | 4.654841933 | 3.434372878 | 0.002385525 | 0.021162515 | -1.604541624 |
| MYD88 | 0.901814785 | 5.24108181 | 3.434130497 | 0.002386904 | 0.021164429 | -1.605081622 |
| HSPA5 | 0.756738271 | 8.269428215 | 3.43343841 | 0.002390848 | 0.021178744 | -1.606623463 |
| ABHD17C | 1.104584852 | 5.613359583 | 3.432662325 | 0.002395278 | 0.021207653 | -1.608352337 |
| WNT4 | 2.715180845 | 4.240520216 | 3.432195999 | 0.002397943 | 0.021220922 | -1.609391116 |
| ALDOA | 0.8247889 | 10.25874029 | 3.42989462 | 0.00241114 | 0.021306609 | -1.614517063 |
| WNK3 | 0.830984352 | -0.478320506 | 3.429608464 | 0.002412786 | 0.021309859 | -1.615154362 |
| MAP2K4 | 0.68920567 | 4.352785301 | 3.429423328 | 0.002413852 | 0.021309859 | -1.615566673 |
| AGPS | 0.899944785 | 3.389053619 | 3.427957739 | 0.002422303 | 0.021368777 | -1.618830433 |
| TIPRL | 0.59618679 | 5.012305242 | 3.427280226 | 0.002426219 | 0.021375618 | -1.620339078 |
| PPP1R17 | -1.257974177 | #NAME? | -4.392292295 | 0.004888265 | 0.031897377 | -1.621191212 |
| LYSMD1 | 0.704150298 | 2.894315755 | 3.426630599 | 0.00242998 | 0.021375618 | -1.621785551 |
| H2BC11 | 2.389729522 | 1.252961246 | 3.426625778 | 0.002430008 | 0.021375618 | -1.621796286 |
| BAZ1A | 0.935107801 | 4.427224685 | 3.426266764 | 0.002432089 | 0.021375618 | -1.622595641 |
| CEP20 | 0.722294575 | 5.204519045 | 3.426205869 | 0.002432442 | 0.021375618 | -1.622731224 |
| TP53 | 0.744681446 | 5.134962335 | 3.426100268 | 0.002433054 | 0.021375618 | -1.622966344 |
| HRCT1 | -2.441643523 | 0.423050291 | -3.425569158 | 0.002436137 | 0.021382043 | -1.62414882 |
| VMO1 | 2.323285931 | 9.249829661 | 3.425153547 | 0.002438552 | 0.021392916 | -1.625074113 |
| RAI1 | 0.842293968 | 4.443407883 | 3.423829721 | 0.002446261 | 0.021424349 | -1.628021202 |
| CRKL | 0.752638404 | 4.665867728 | 3.4237086 | 0.002446967 | 0.021424349 | -1.628290825 |
| COLGALT1 | 0.699421849 | 5.346510678 | 3.423567629 | 0.00244779 | 0.021424349 | -1.628604633 |
| TMEM92 | 1.158233597 | 2.021809916 | 3.423561166 | 0.002447827 | 0.021424349 | -1.62861902 |
| CSNK2A3 | 3.510119788 | #NAME? | 3.426310439 | 0.002855907 | 0.023342706 | -1.629553562 |
| CFAP20 | 0.936932169 | 5.997644867 | 3.422743726 | 0.002452602 | 0.021432736 | -1.630438605 |
| LTB4R2 | 1.657203063 | 3.324067634 | 3.422716699 | 0.00245276 | 0.021432736 | -1.630498762 |
| THNSL1 | 0.938950924 | 2.84574298 | 3.421118062 | 0.002462125 | 0.021475395 | -1.63405691 |
| PRXL2B | 0.800029586 | 4.504448857 | 3.420484942 | 0.002465843 | 0.021497517 | -1.635465943 |
| SLC27A6 | -2.592633936 | #NAME? | -3.433506799 | 0.002512912 | 0.021708515 | -1.638074212 |
| B4GALT5 | 1.43153184 | 5.730833845 | 3.418240086 | 0.002479071 | 0.021600411 | -1.64046139 |
| ERBIN | 0.79009642 | 4.780950613 | 3.417983612 | 0.002480587 | 0.021600411 | -1.641032063 |
| APOBR | 1.386161237 | 2.802885788 | 3.41772614 | 0.00248211 | 0.021600411 | -1.641604942 |
| GPT | -1.764098003 | 3.299942684 | -3.417677719 | 0.002482396 | 0.021600411 | -1.641712679 |
| LEPROT | 0.604595253 | 5.533345386 | 3.41674384 | 0.002487927 | 0.02162784 | -1.64379047 |
| LRRC8A | 1.109594537 | 5.450686255 | 3.415758322 | 0.002493777 | 0.02165852 | -1.645982989 |
| KPNA4 | 0.611625851 | 3.922139075 | 3.415431689 | 0.002495718 | 0.02165852 | -1.646709621 |
| AK2 | 0.665101427 | 5.943313253 | 3.415347357 | 0.00249622 | 0.02165852 | -1.646897226 |
| SIX1 | 0.700842036 | 6.027938715 | 3.415110383 | 0.00249763 | 0.021660419 | -1.647424386 |
| YWHAQ | 0.66519504 | 7.515837204 | 3.414541078 | 0.00250102 | 0.021674028 | -1.648690795 |
| ANKRD50 | 0.866733976 | 2.862515535 | 3.414284542 | 0.00250255 | 0.021674028 | -1.649261435 |
| TRIM44 | 0.669230502 | 4.755667295 | 3.413495689 | 0.002507258 | 0.021702519 | -1.651016095 |
| H2AZ1 | 1.002195554 | 8.687348447 | 3.412731368 | 0.002511828 | 0.021708515 | -1.65271608 |
| EXOC5 | 0.856621493 | 3.73166813 | 3.412525889 | 0.002513058 | 0.021708515 | -1.653173082 |
| ESYT2 | 0.667175401 | 5.637325364 | 3.412254732 | 0.002514682 | 0.021708515 | -1.653776149 |
| CCDC3 | -1.397581031 | 5.447349376 | -3.412182824 | 0.002515113 | 0.021708515 | -1.653936075 |
| SCGN | -3.419770622 | #NAME? | -3.98277254 | 0.004201958 | 0.029244854 | -1.654599157 |
| CCNJL | 1.313889999 | 1.346458667 | 3.411776866 | 0.002517546 | 0.021719212 | -1.654838914 |
| SMG7 | 0.673133124 | 4.479140841 | 3.411167235 | 0.002521205 | 0.021731677 | -1.656194664 |
| NCALD | -1.684350339 | 4.04579783 | -3.410874572 | 0.002522964 | 0.021731677 | -1.656845488 |
| TNC | 1.877725289 | 7.386187407 | 3.409645852 | 0.00253036 | 0.021767796 | -1.659577753 |
| SLC30A2 | 1.335772141 | -0.402674081 | 3.40926915 | 0.002532631 | 0.021773238 | -1.660415358 |
| ZNF267 | 1.17458495 | 3.039497684 | 3.408904511 | 0.002534832 | 0.021773238 | -1.661226119 |
| SEC23IP | 0.820867014 | 4.322715883 | 3.40850139 | 0.002537267 | 0.021773238 | -1.662122414 |
| NT5C3A | 0.727283283 | 5.580857351 | 3.408262534 | 0.002538711 | 0.021773238 | -1.662653469 |
| TRAPPC9 | 0.665646997 | 3.732796671 | 3.408223245 | 0.002538949 | 0.021773238 | -1.662740822 |
| SLC35A5 | 0.752707556 | 3.965285609 | 3.407556899 | 0.002542982 | 0.021773238 | -1.66422227 |
| LIF | 1.936002191 | 3.809514635 | 3.407406053 | 0.002543896 | 0.021773238 | -1.664557626 |
| CCL11 | 2.559256124 | 3.918334999 | 3.407258572 | 0.002544789 | 0.021773238 | -1.664885497 |
| SLC52A2 | 0.651220144 | 5.019815154 | 3.407019489 | 0.002546239 | 0.021773238 | -1.665417006 |
| SMG8 | 0.854235092 | 3.141792998 | 3.406713748 | 0.002548094 | 0.021773238 | -1.666096685 |
| PRAF2 | 0.8570634 | 4.375676805 | 3.406661864 | 0.002548409 | 0.021773238 | -1.666212026 |
| TPPP | 1.805544551 | 3.299133708 | 3.406407636 | 0.002549952 | 0.021773238 | -1.666777173 |
| BNC1 | 2.302633041 | 1.319550771 | 3.406240903 | 0.002550965 | 0.021773238 | -1.667147815 |
| ARPC5L | 0.604084088 | 5.761246347 | 3.406178264 | 0.002551346 | 0.021773238 | -1.667287059 |
| MYO10 | 1.021885725 | 3.818319157 | 3.405686846 | 0.002554333 | 0.021788511 | -1.668379427 |
| PLP1 | -3.094270306 | #NAME? | -3.419554502 | 0.002596472 | 0.0219361 | -1.668658141 |
| DSP | 1.191031586 | 5.58589199 | 3.405227023 | 0.002557132 | 0.021802159 | -1.669401523 |
| IRX2 | -2.897278366 | 1.177368805 | -3.404912296 | 0.002559049 | 0.021804913 | -1.67010108 |
| GDE1 | 0.649081758 | 6.109920261 | 3.404778878 | 0.002559863 | 0.021804913 | -1.670397627 |
| H2BC21 | 1.543614618 | 4.473425323 | 3.404583815 | 0.002561052 | 0.021804913 | -1.670831186 |
| UBLCP1 | 0.609648718 | 5.149540719 | 3.403600411 | 0.002567057 | 0.021825384 | -1.673016862 |
| SLC28A3 | -1.575614507 | 2.671173052 | -3.402886985 | 0.002571422 | 0.021852278 | -1.674602386 |
| ZNF701 | 0.79995503 | 2.037392737 | 3.402492295 | 0.002573839 | 0.021862609 | -1.675479507 |
| SYNE2 | 0.731561895 | 6.621500442 | 3.401763984 | 0.002578307 | 0.021890332 | -1.677097963 |
| TBK1 | 0.672939961 | 4.546782937 | 3.401219149 | 0.002581654 | 0.021897541 | -1.678308636 |
| ZNF675 | 1.392238571 | 2.68918672 | 3.401205768 | 0.002581736 | 0.021897541 | -1.678338371 |
| SCAMP1 | 0.659851617 | 3.898654127 | 3.401037894 | 0.002582768 | 0.021897541 | -1.678711391 |
| TTC33 | 0.917445663 | 3.156354902 | 3.400460138 | 0.002586324 | 0.021917466 | -1.679995138 |
| ZNF532 | 0.818171608 | 4.065739331 | 3.39936016 | 0.002593106 | 0.0219361 | -1.682439075 |
| NIPA2 | 0.659715586 | 4.814592792 | 3.399269674 | 0.002593664 | 0.0219361 | -1.682640108 |
| ZNF552 | 0.646621762 | 3.205707587 | 3.399264006 | 0.002593699 | 0.0219361 | -1.682652701 |
| ASAH1 | 0.589566822 | 7.352194446 | 3.39897204 | 0.002595503 | 0.0219361 | -1.68330135 |
| RNPEP | 0.781303501 | 6.717624359 | 3.398735338 | 0.002596966 | 0.0219361 | -1.68382721 |
| ZC3H8 | 0.692264251 | 3.423600754 | 3.397167612 | 0.002606676 | 0.022007899 | -1.687309833 |
| UBE4B | 0.651580805 | 4.487112983 | 3.396034948 | 0.002613714 | 0.022046847 | -1.689825712 |
| CYB5B | 0.720408765 | 4.95797453 | 3.395771644 | 0.002615353 | 0.022050441 | -1.69041053 |
| HRH1 | 1.873417979 | 1.147348732 | 3.395489803 | 0.002617108 | 0.022053804 | -1.691036507 |
| ZNF626 | 0.789431963 | 2.884819464 | 3.394999448 | 0.002620164 | 0.022060326 | -1.692125564 |
| TNFAIP1 | 0.805372053 | 4.945021286 | 3.394457834 | 0.002623544 | 0.022071099 | -1.693328414 |
| PIK3CA | 0.704707787 | 2.866012955 | 3.394405487 | 0.002623871 | 0.022071099 | -1.693444667 |
| RAB19 | 0.677364134 | 1.959330949 | 3.394170554 | 0.002625338 | 0.022073234 | -1.693966402 |
| FMO2 | 1.687411151 | 5.746845223 | 3.392439889 | 0.002636174 | 0.022140135 | -1.697809522 |
| GOLPH3 | 0.60494035 | 6.405392685 | 3.392316617 | 0.002636948 | 0.022140135 | -1.69808324 |
| YWHAB | 0.654081586 | 7.32308886 | 3.391922247 | 0.002639424 | 0.022150698 | -1.698958894 |
| ECE1 | 0.724962367 | 7.177497746 | 3.391460371 | 0.002642327 | 0.02216483 | -1.699984399 |
| TMEM70 | 0.591878772 | 4.581028964 | 3.389248414 | 0.002656271 | 0.022251012 | -1.704895085 |
| CDH1 | 0.745695342 | 6.55152925 | 3.388465746 | 0.002661222 | 0.02227197 | -1.706632442 |
| TTC36 | -1.015344469 | 1.370670939 | -3.387742799 | 0.002665804 | 0.022300051 | -1.70823713 |
| ANKEF1 | 1.059255625 | 2.374999419 | 3.387309044 | 0.002668556 | 0.022312813 | -1.709199869 |
| CAB39 | 0.766102827 | 5.772055992 | 3.386101717 | 0.002676232 | 0.022366711 | -1.711879402 |
| PTCD1 | 1.071694083 | #NAME? | 3.399343845 | 0.002722359 | 0.022606766 | -1.712905485 |
| AGT | -2.448663404 | 0.591478635 | -3.384248779 | 0.002688055 | 0.02244489 | -1.715991277 |
| SCYL2 | 0.772766055 | 4.254956338 | 3.383979848 | 0.002689775 | 0.022448946 | -1.716588011 |
| COQ8B | 0.653416331 | 5.272380009 | 3.383641762 | 0.002691939 | 0.022452361 | -1.717338177 |
| PRKAR1A | 0.978985393 | 7.464420586 | 3.383529173 | 0.00269266 | 0.022452361 | -1.71758799 |
| TMEM33 | 0.728250407 | 4.066846439 | 3.382757692 | 0.002697606 | 0.022473048 | -1.719299703 |
| GALNT14 | 1.625432353 | 4.261631035 | 3.381754835 | 0.002704048 | 0.022514598 | -1.721524613 |
| PFKM | 0.704666141 | 4.941871704 | 3.381596054 | 0.00270507 | 0.022514598 | -1.721876863 |
| ANXA8 | 2.106618918 | 5.77389421 | 3.380980443 | 0.002709033 | 0.022526967 | -1.723242529 |
| SS18 | 0.588105449 | 6.274109759 | 3.3803243 | 0.002713264 | 0.022551835 | -1.724698034 |
| ECT2 | 1.517079757 | 3.458552391 | 3.379832756 | 0.002716437 | 0.022567899 | -1.725788361 |
| RBM12 | 0.766464652 | 4.222100485 | 3.378289506 | 0.002726425 | 0.022630198 | -1.729211258 |
| MYH14 | 0.908935988 | 5.885518881 | 3.377797243 | 0.002729618 | 0.022636041 | -1.730302992 |
| SPTY2D1 | 0.670694486 | 3.572230665 | 3.377118983 | 0.002734024 | 0.022662244 | -1.731807157 |
| LDAH | 0.85646337 | 3.477622612 | 3.376094746 | 0.002740691 | 0.022707152 | -1.734078425 |
| MTPN | 0.809973416 | 4.579624389 | 3.375557494 | 0.002744194 | 0.022713632 | -1.735269714 |
| LUZP6 | 0.809973416 | 4.579624389 | 3.375557494 | 0.002744194 | 0.022713632 | -1.735269714 |
| CD300LG | -1.686327473 | -0.25802689 | -3.375400284 | 0.00274522 | 0.022713632 | -1.735618297 |
| DAZ4 | 7.916445007 | #NAME? | 10.99442619 | 0.002019602 | 0.019271334 | -1.736541246 |
| ANXA11 | 0.734881067 | 7.360861487 | 3.373974645 | 0.00275454 | 0.022780384 | -1.738779173 |
| RAMP1 | 2.09204547 | 5.113894687 | 3.373096277 | 0.002760298 | 0.022807259 | -1.740726469 |
| FRMD8 | 0.698184411 | 4.878617508 | 3.371215801 | 0.002772664 | 0.022899034 | -1.744894902 |
| HAO2 | -3.12818033 | -0.50545448 | -3.370906874 | 0.002774701 | 0.022905453 | -1.745579632 |
| CCDC112 | -0.795384663 | 2.64590527 | -3.368494434 | 0.002790656 | 0.023016271 | -1.750926153 |
| PDZRN4 | -3.117547209 | #NAME? | -3.452143456 | 0.003076398 | 0.024370088 | -1.751737341 |
| CD1A | 2.552104261 | 0.049223396 | 3.36750573 | 0.002797221 | 0.02303907 | -1.753117029 |
| SLFN5 | 1.339158833 | 4.336609049 | 3.366339515 | 0.002804984 | 0.023092551 | -1.75570102 |
| ALOX5AP | 1.719231237 | 4.951108938 | 3.364137791 | 0.002819697 | 0.02319518 | -1.760578691 |
| MED25 | 0.999942592 | 5.538769855 | 3.364092452 | 0.002820001 | 0.02319518 | -1.760679126 |
| CPAMD8 | 1.154846872 | 2.447872699 | 3.363656532 | 0.002822924 | 0.023208719 | -1.761644745 |
| TCEAL2 | -2.201919693 | 2.256259696 | -3.361590363 | 0.002836815 | 0.023292059 | -1.766221088 |
| MAP7 | 0.73683545 | 4.612936183 | 3.361456301 | 0.002837718 | 0.023292059 | -1.766517992 |
| SLC2A10 | 0.886820635 | 4.542024643 | 3.361261572 | 0.002839031 | 0.023292059 | -1.76694925 |
| ASGR2 | 1.479437521 | 0.609325904 | 3.361197417 | 0.002839464 | 0.023292059 | -1.767091328 |
| MEGF8 | 0.590714897 | 3.549752264 | 3.360830081 | 0.002841943 | 0.023301883 | -1.767904826 |
| H2BC4 | 1.899766368 | 2.312548166 | 3.359258534 | 0.002852572 | 0.023342706 | -1.771384864 |
| MTSS1 | 1.429529109 | 4.87079755 | 3.35909183 | 0.002853702 | 0.023342706 | -1.771753987 |
| INTS7 | 0.819391613 | 3.136754257 | 3.359032084 | 0.002854107 | 0.023342706 | -1.771886278 |
| CDYL | 0.693199668 | 4.114089629 | 3.358929167 | 0.002854805 | 0.023342706 | -1.772114156 |
| PON1 | -1.937766157 | #NAME? | -3.372156198 | 0.002901168 | 0.023606554 | -1.772321802 |
| FBXW11 | 0.71611825 | 4.431795164 | 3.357643611 | 0.002863535 | 0.023394541 | -1.774960467 |
| RANBP9 | 0.625247562 | 5.511863022 | 3.357137113 | 0.002866982 | 0.023412183 | -1.7760818 |
| GNS | 0.627917108 | 5.863886427 | 3.356493572 | 0.002871367 | 0.023431928 | -1.777506463 |
| ARID5B | 0.84190328 | 4.339131285 | 3.356404193 | 0.002871977 | 0.023431928 | -1.777704325 |
| SAMD4B | 0.634455221 | 4.48010309 | 3.353636266 | 0.002890917 | 0.023575879 | -1.783830978 |
| TBC1D31 | 0.879861874 | 2.52600545 | 3.353426362 | 0.002892358 | 0.02357706 | -1.784295528 |
| ZNF579 | 0.600495517 | 3.886482783 | 3.353214261 | 0.002893815 | 0.023578369 | -1.784764932 |
| IGSF3 | 1.509103804 | 3.989187253 | 3.352538691 | 0.002898461 | 0.023595079 | -1.786259991 |
| TRDN | -2.246015056 | #NAME? | -3.592456392 | 0.003767229 | 0.027448245 | -1.786413141 |
| SPEGNB | -1.705220135 | #NAME? | -3.379570163 | 0.003001904 | 0.024017877 | -1.788015249 |
| TSPAN33 | -0.89208263 | 4.250815222 | -3.351654634 | 0.002904551 | 0.023618791 | -1.788216307 |
| UAP1 | 0.868417995 | 7.007398336 | 3.3508882 | 0.002909841 | 0.023638296 | -1.789912217 |
| PSME3 | 0.795393484 | 5.409141197 | 3.350774143 | 0.002910629 | 0.023638296 | -1.790164584 |
| ELL3 | 1.395962366 | 3.283480283 | 3.350638252 | 0.002911568 | 0.023638296 | -1.790465259 |
| CEMIP2 | 0.755026255 | 4.509797618 | 3.349522888 | 0.002919288 | 0.023669272 | -1.792932998 |
| ARL6IP6 | 0.833603375 | 3.531371091 | 3.348999721 | 0.002922916 | 0.023684598 | -1.79409042 |
| MEGF10 | -1.262916945 | -1.177303125 | -3.348874769 | 0.002923783 | 0.023684598 | -1.794366849 |
| ADAMTS20 | 1 | #NAME? | 4.569815908 | 0.006462024 | 0.03821737 | -1.795226787 |
| NFATC1 | 0.734685168 | 3.375556643 | 3.348322448 | 0.002927619 | 0.023701131 | -1.795588699 |
| DPYSL4 | -1.983173191 | -0.523045917 | -3.347339644 | 0.002934457 | 0.023733332 | -1.797762723 |
| PLAGL2 | 0.819463958 | 3.244867663 | 3.346573573 | 0.002939798 | 0.023760256 | -1.799457192 |
| SLC7A6 | 1.174511803 | 3.180187148 | 3.346007945 | 0.002943747 | 0.023763999 | -1.80070823 |
| ZC3HAV1L | 0.85307173 | 3.965644634 | 3.345966204 | 0.002944039 | 0.023763999 | -1.800800547 |
| OSBPL11 | 0.846799068 | 2.86344522 | 3.345460129 | 0.002947577 | 0.023776622 | -1.80191981 |
| EIF4G3 | 0.7121751 | 4.521661584 | 3.345341615 | 0.002948406 | 0.023776622 | -1.802181916 |
| MESP2 | -1.372220995 | -1.164406532 | -3.345181811 | 0.002949525 | 0.023776622 | -1.802535334 |
| PAFAH1B3 | 0.77227941 | 5.448856281 | 3.344499211 | 0.002954307 | 0.02380462 | -1.804044893 |
| GJB3 | 1.689632822 | 4.140613898 | 3.34415176 | 0.002956744 | 0.02381183 | -1.804813241 |
| NUDT15 | 0.609195435 | 4.677187895 | 3.343998383 | 0.00295782 | 0.02381183 | -1.805152408 |
| APEX2 | 0.66846957 | 3.914779662 | 3.34339851 | 0.002962034 | 0.023824659 | -1.806478885 |
| HMGXB4 | 0.858003602 | 3.254382999 | 3.342880195 | 0.00296568 | 0.023843435 | -1.807624962 |
| PLA2G7 | 2.192415541 | 1.623734794 | 3.342586542 | 0.002967747 | 0.023849513 | -1.808274251 |
| TSPAN3 | 1.029047021 | 9.041648783 | 3.341862541 | 0.00297285 | 0.023878087 | -1.809875001 |
| APOL1 | 1.154157543 | 7.004704436 | 3.341447559 | 0.002975779 | 0.023878087 | -1.810792471 |
| KAT6A | 1.052944448 | 2.997451431 | 3.340055554 | 0.002985624 | 0.023940278 | -1.813869764 |
| GAPDH | 0.966583817 | 11.61421588 | 3.339227556 | 0.002991494 | 0.023969094 | -1.815700033 |
| KCNK13 | 1.529527954 | -1.418151724 | 3.339177003 | 0.002991853 | 0.023969094 | -1.815811774 |
| CASKIN1 | -1.415578797 | -1.388364514 | -3.337861239 | 0.003001207 | 0.024017877 | -1.81871995 |
| STEAP3 | 0.995323365 | 5.63593357 | 3.336416876 | 0.003011508 | 0.024084116 | -1.821911974 |
| RNF40 | 0.616921516 | 4.862545336 | 3.336055924 | 0.003014087 | 0.024086372 | -1.822709609 |
| TXNDC17 | 0.970282119 | 5.446407472 | 3.336006776 | 0.003014439 | 0.024086372 | -1.822818215 |
| PGM5 | -1.88730054 | 1.575325217 | -3.33486322 | 0.003022626 | 0.024141187 | -1.825345078 |
| ASB7 | 0.709152469 | 2.826481612 | 3.33396475 | 0.003029074 | 0.024182067 | -1.827330205 |
| CALR | 0.716609455 | 9.421080808 | 3.333234618 | 0.003034324 | 0.024204672 | -1.828943282 |
| RAB43 | 1.140668411 | 2.763122951 | 3.332856019 | 0.00303705 | 0.024204672 | -1.829779677 |
| CDC14B | 0.787441002 | 4.07142454 | 3.332651772 | 0.003038522 | 0.024204672 | -1.830230884 |
| ABCC10 | 0.86727118 | 4.410921835 | 3.332461659 | 0.003039892 | 0.024204672 | -1.83065086 |
| GDF10 | -4.11127677 | #NAME? | -3.345380303 | 0.003088477 | 0.024434069 | -1.830715641 |
| EIF2AK1 | 0.67406524 | 6.052398934 | 3.332144596 | 0.003042178 | 0.024210357 | -1.831351265 |
| CCDC34 | 1.13820917 | 4.104153987 | 3.331191212 | 0.003049064 | 0.024243783 | -1.833457209 |
| ZBTB9 | 0.833070995 | 3.707869859 | 3.331042976 | 0.003050136 | 0.024243783 | -1.833784634 |
| MTERF2 | -0.650991603 | 4.622393461 | -3.329385753 | 0.003062146 | 0.024317982 | -1.837444822 |
| AZI2 | 0.639404846 | 4.99698477 | 3.329008844 | 0.003064883 | 0.024322833 | -1.8382772 |
| RAD21 | 0.86217088 | 6.350369137 | 3.327640935 | 0.00307484 | 0.024370088 | -1.841297891 |
| USP32 | 0.783963949 | 3.465214703 | 3.327379353 | 0.003076747 | 0.024370088 | -1.841875489 |
| PPL | 1.164296718 | 5.659543914 | 3.324374814 | 0.003098739 | 0.024471085 | -1.848508822 |
| PUM1 | 0.646475727 | 5.031141654 | 3.32423069 | 0.003099798 | 0.024471085 | -1.848826972 |
| DCUN1D1 | 0.721853577 | 3.880111062 | 3.324084264 | 0.003100874 | 0.024471085 | -1.849150196 |
| BYSL | 0.636011968 | 3.898364109 | 3.321214414 | 0.003122038 | 0.024600251 | -1.855484331 |
| POU5F1B | -1.804583214 | #NAME? | -3.333306116 | 0.003176759 | 0.024773814 | -1.857006487 |
| TTLL12 | 1.036334463 | 4.925930056 | 3.320206916 | 0.003129501 | 0.024637706 | -1.857707622 |
| TRIP13 | 1.616342524 | 4.048942525 | 3.319100236 | 0.003137719 | 0.024691713 | -1.86014955 |
| SCPEP1 | 0.887127398 | 7.746009472 | 3.318528013 | 0.003141976 | 0.024705745 | -1.861412083 |
| CLN8 | 0.695302944 | 3.499256713 | 3.318373883 | 0.003143124 | 0.024705745 | -1.861752139 |
| JPH1 | 1.718218743 | 1.648497745 | 3.318312994 | 0.003143577 | 0.024705745 | -1.861886477 |
| B4GALT4 | 0.96984918 | 6.041478606 | 3.317912719 | 0.00314656 | 0.024705942 | -1.862769574 |
| RLF | 0.728639304 | 3.052255826 | 3.31731345 | 0.003151031 | 0.024705942 | -1.864091638 |
| F12 | 1.425579317 | 1.678330278 | 3.316483524 | 0.003157233 | 0.024717567 | -1.865922442 |
| UBE2G1 | 0.637956426 | 4.683853398 | 3.316472713 | 0.003157314 | 0.024717567 | -1.865946289 |
| DAPK1 | -1.181129827 | 4.127071958 | -3.315779927 | 0.0031625 | 0.024745172 | -1.867474457 |
| PPP1CB | 0.630446233 | 6.746079228 | 3.31546433 | 0.003164866 | 0.024745172 | -1.868170577 |
| BLCAP | 0.754698429 | 6.617699495 | 3.315456819 | 0.003164922 | 0.024745172 | -1.868187145 |
| CHURC1 | 0.73936299 | 4.917949098 | 3.314526182 | 0.003171907 | 0.024760697 | -1.87023976 |
| TTC39B | 1.055533688 | 3.235891726 | 3.314471267 | 0.00317232 | 0.024760697 | -1.870360876 |
| PLAA | 0.678584256 | 3.668137767 | 3.314317809 | 0.003173473 | 0.024760697 | -1.870699324 |
| CEACAM4 | 2.185375036 | 0.348515828 | 3.31211211 | 0.003190097 | 0.024867168 | -1.87556343 |
| KIAA1755 | -1.626896216 | 1.042290102 | -3.311467083 | 0.003194974 | 0.024894518 | -1.876985688 |
| CDV3 | 0.603712775 | 6.572075944 | 3.310881536 | 0.003199408 | 0.024914598 | -1.878276724 |
| CADM1 | -1.206719465 | 3.296728928 | -3.309786593 | 0.003207716 | 0.024951033 | -1.880690705 |
| FPGT | 0.672698576 | 3.123713524 | 3.30957561 | 0.003209319 | 0.02495283 | -1.881155824 |
| REPIN1 | 0.671546043 | 6.096776001 | 3.309258741 | 0.003211728 | 0.02496089 | -1.881854357 |
| ASB1 | 0.651693344 | 3.377799556 | 3.30631015 | 0.003234231 | 0.025094634 | -1.888353493 |
| FDXR | 1.332587402 | 5.339957328 | 3.306100541 | 0.003235836 | 0.025094634 | -1.888815435 |
| SP7 | -3.629085337 | #NAME? | -3.805893048 | 0.00537649 | 0.033997514 | -1.890366114 |
| GINS3 | 0.995814566 | 3.014692025 | 3.305164124 | 0.003243018 | 0.0251289 | -1.890879032 |
| PIN1 | 0.653250316 | 6.608504344 | 3.304714059 | 0.003246475 | 0.025134271 | -1.891870783 |
| SLC36A1 | 0.75611157 | 2.107120928 | 3.304287566 | 0.003249755 | 0.025148955 | -1.892810554 |
| SSH1 | 0.992324199 | 3.550368187 | 3.302293053 | 0.003265135 | 0.025257229 | -1.897204944 |
| MARVELD2 | 0.70766813 | 3.789606119 | 3.301390074 | 0.003272121 | 0.025292197 | -1.899194156 |
| TWF2 | 0.696933285 | 6.089164336 | 3.301349314 | 0.003272437 | 0.025292197 | -1.899283944 |
| TBC1D14 | 0.663028186 | 5.4143718 | 3.301126672 | 0.003274162 | 0.025294779 | -1.899774386 |
| FBXO41 | 0.948557817 | 1.854313134 | 3.299960502 | 0.003283212 | 0.025327195 | -1.902343083 |
| KDM2A | 0.63304591 | 5.541328998 | 3.29986822 | 0.003283929 | 0.025327195 | -1.90254634 |
| BLZF1 | 0.826258841 | 4.209196491 | 3.299105212 | 0.003289864 | 0.025362216 | -1.904226837 |
| MRPL42 | 0.631675278 | 3.074008831 | 3.298018594 | 0.003298335 | 0.025396431 | -1.90661987 |
| IRF6 | 1.152590679 | 6.122483152 | 3.297604779 | 0.003301566 | 0.025396431 | -1.90753114 |
| CKS2 | 1.69351809 | 5.231021679 | 3.297462118 | 0.003302681 | 0.025396431 | -1.907845288 |
| GRM4 | 1.625941614 | -1.459683886 | 3.296648161 | 0.003309049 | 0.025407041 | -1.909637596 |
| F13A1 | 2.202713284 | 4.416121062 | 3.296590094 | 0.003309503 | 0.025407041 | -1.909765452 |
| RAP1B | 0.679875105 | 4.410035431 | 3.296571448 | 0.003309649 | 0.025407041 | -1.909806509 |
| CCL8 | 2.664981007 | 3.020996912 | 3.2962494 | 0.003312172 | 0.025415681 | -1.910515605 |
| CAV2 | 0.605853856 | 5.495926391 | 3.294256177 | 0.003327829 | 0.025501745 | -1.914903879 |
| SKAP2 | 1.425431761 | 2.333804766 | 3.293936263 | 0.003330349 | 0.025501745 | -1.915608126 |
| CCN4 | 1.347285802 | 4.032792441 | 3.293929874 | 0.003330399 | 0.025501745 | -1.915622189 |
| DR1 | 0.749998429 | 3.442262207 | 3.292851435 | 0.003338907 | 0.025554611 | -1.917996067 |
| MRPL15 | 0.671493384 | 5.174157565 | 3.292698704 | 0.003340114 | 0.025554611 | -1.918332239 |
| RFK | 0.62001303 | 4.761762213 | 3.291143259 | 0.003352426 | 0.025638025 | -1.921755638 |
| UQCRFS1 | 0.613437111 | 5.945444526 | 3.290753377 | 0.003355519 | 0.025650893 | -1.922613656 |
| TNPO3 | 0.658157681 | 4.364339441 | 3.290297377 | 0.00335914 | 0.025667785 | -1.923617142 |
| TP63 | 1.897747561 | 5.791869366 | 3.289392466 | 0.003366338 | 0.025701183 | -1.925608384 |
| CHP2 | 2.689925578 | 4.251694373 | 3.287927157 | 0.003378024 | 0.025768769 | -1.928832417 |
| PPP4C | 0.637131587 | 7.2170612 | 3.286646818 | 0.003388267 | 0.025825243 | -1.931649105 |
| ACYP1 | 0.842995578 | 5.445986414 | 3.286229974 | 0.003391609 | 0.025839882 | -1.93256607 |
| PRG2 | -1.811024226 | 2.015404647 | -3.286028403 | 0.003393226 | 0.025841375 | -1.933009468 |
| EEF1AKMT3 | -0.744413298 | 3.319400535 | -3.285766267 | 0.00339533 | 0.025842222 | -1.933586081 |
| CWC27 | 0.619672681 | 4.497198487 | 3.2856605 | 0.003396179 | 0.025842222 | -1.93381873 |
| TBC1D9 | 1.032447637 | 4.655070685 | 3.285314912 | 0.003398955 | 0.025852531 | -1.93457888 |
| SGCA | -2.486341714 | -0.438422051 | -3.284237335 | 0.003407626 | 0.025896822 | -1.93694894 |
| ZBTB21 | 0.820567698 | 2.603797723 | 3.283332951 | 0.003414921 | 0.025930582 | -1.938937887 |
| KIF5B | 0.785890964 | 5.767484249 | 3.28189608 | 0.00342654 | 0.026006165 | -1.942097546 |
| SH3GL1 | 0.656172371 | 5.673039179 | 3.281486519 | 0.00342986 | 0.026006165 | -1.942998085 |
| DDX10 | 0.667227552 | 3.512622552 | 3.28131486 | 0.003431252 | 0.026006165 | -1.943375518 |
| MST1R | 1.302863955 | 3.742240696 | 3.281136139 | 0.003432702 | 0.026006165 | -1.943768471 |
| TUBB3 | 2.19496816 | 2.157633935 | 3.280962062 | 0.003434114 | 0.026006165 | -1.944151207 |
| CLTA | 0.612037386 | 8.628622742 | 3.280720493 | 0.003436076 | 0.026006165 | -1.944682326 |
| HCAR3 | 2.539259458 | 3.361434717 | 3.279262728 | 0.003447936 | 0.026072418 | -1.947887133 |
| ARMS2 | -1.573246636 | #NAME? | -3.46081276 | 0.004285829 | 0.029610512 | -1.948727101 |
| MTTP | 2.324888752 | #NAME? | 3.290958242 | 0.003506297 | 0.026284216 | -1.949008111 |
| ABCA4 | 1.443682019 | 0.109950625 | 3.277972744 | 0.003458464 | 0.026138678 | -1.950722713 |
| STRC | -1.147087193 | 1.008048939 | -3.277812604 | 0.003459774 | 0.026138678 | -1.951074702 |
| MCM4 | 1.402184496 | 4.363173189 | 3.277630091 | 0.003461266 | 0.026138678 | -1.951475858 |
| SAMD5 | 1.16597264 | 1.409919491 | 3.277485672 | 0.003462448 | 0.026138678 | -1.951793282 |
| CEP19 | 1.169148626 | 3.351649946 | 3.276990235 | 0.003466504 | 0.026158442 | -1.952882185 |
| RAB18 | 0.646476594 | 5.002480992 | 3.276533487 | 0.003470248 | 0.026175831 | -1.953886009 |
| H2AC17 | 2.60567011 | #NAME? | 3.248913628 | 0.004765869 | 0.031437101 | -1.955923106 |
| TFRC | 1.139143738 | 5.072139955 | 3.275288858 | 0.003480469 | 0.026218328 | -1.956621187 |
| TBXAS1 | 1.084842618 | 3.548646319 | 3.275098343 | 0.003482037 | 0.026218328 | -1.957039831 |
| THOC3 | 1.018188045 | 6.926159315 | 3.274912702 | 0.003483564 | 0.026218328 | -1.957447757 |
| TMEM169 | 0.773337374 | -0.354095037 | 3.273763344 | 0.003493038 | 0.026249745 | -1.95997319 |
| FOLH1B | -1.829105978 | #NAME? | -3.72615285 | 0.006017237 | 0.036427921 | -1.96128775 |
| CSF3R | 2.117983141 | 3.158224483 | 3.273021422 | 0.003499166 | 0.026279113 | -1.961603236 |
| AR | -2.086950482 | 0.080420571 | -3.272940428 | 0.003499836 | 0.026279113 | -1.961781176 |
| SMR3B | -3.92243529 | #NAME? | -3.45225733 | 0.004356388 | 0.02987878 | -1.964221161 |
| RAB20 | 0.738641271 | 5.076217337 | 3.27166838 | 0.003510369 | 0.026303905 | -1.964575646 |
| KCNC3 | 1.267832768 | 0.716786413 | 3.271079137 | 0.003515259 | 0.026325061 | -1.965869995 |
| TOPORS | 0.819066457 | 3.617301982 | 3.270979363 | 0.003516088 | 0.026325061 | -1.966089156 |
| SCAMP4 | 0.665274704 | 5.559783175 | 3.26956655 | 0.003527842 | 0.026402194 | -1.969192255 |
| CNOT9 | 0.746371667 | 4.975364421 | 3.269207281 | 0.003530837 | 0.026413739 | -1.969981287 |
| GABPB1 | 0.64075066 | 3.743069945 | 3.268682205 | 0.003535219 | 0.026435643 | -1.971134416 |
| EPHA10 | -1.188374104 | 0.44491104 | -3.267727123 | 0.003543202 | 0.026483794 | -1.97323174 |
| LIPT2 | 0.907523475 | 2.252296002 | 3.267563675 | 0.00354457 | 0.026483794 | -1.973590645 |
| ARSI | 1.629048397 | -0.712875252 | 3.267158018 | 0.003547968 | 0.026492438 | -1.974481381 |
| PPM1N | 1.167861829 | 0.053532255 | 3.267077729 | 0.003548641 | 0.026492438 | -1.974657674 |
| SLC9A5 | -0.77498377 | 1.104686606 | -3.266022985 | 0.003557491 | 0.026547612 | -1.976973482 |
| IDH3A | 0.791690285 | 5.364921706 | 3.26527921 | 0.003563745 | 0.026583373 | -1.978606381 |
| TNK1 | 0.888644439 | 4.308525738 | 3.264998908 | 0.003566104 | 0.026586123 | -1.97922173 |
| PLEKHG5 | 0.74747076 | 3.843669669 | 3.264888144 | 0.003567037 | 0.026586123 | -1.979464888 |
| CENPV | -0.948492056 | 3.177492115 | -3.264472115 | 0.003570543 | 0.026601351 | -1.980378162 |
| DENND3 | -0.94229727 | 3.8570459 | -3.263104986 | 0.003582088 | 0.026632313 | -1.983379045 |
| C2orf88 | -1.733515885 | 1.052729137 | -3.262952188 | 0.00358338 | 0.026632313 | -1.983714415 |
| OBSCN | 1.378116451 | 3.021259602 | 3.26293972 | 0.003583486 | 0.026632313 | -1.983741781 |
| RASSF9 | 1.752686252 | 3.536972333 | 3.262679769 | 0.003585686 | 0.026637778 | -1.984312326 |
| MRPS35 | 0.5920008 | 5.731538505 | 3.262324954 | 0.003588691 | 0.026649216 | -1.985091056 |
| SFT2D3 | 0.755162153 | 3.174336814 | 3.262078616 | 0.003590778 | 0.026653835 | -1.985631691 |
| SLC39A6 | 0.729311187 | 5.647770494 | 3.261285393 | 0.003597509 | 0.026681021 | -1.987372481 |
| ACP5 | 0.906516988 | 5.548688919 | 3.260932934 | 0.003600504 | 0.026681021 | -1.988145936 |
| KCNJ11 | 1.237788949 | 0.041408049 | 3.260814111 | 0.003601514 | 0.026681021 | -1.988406682 |
| IFNE | 2.779834833 | 0.641154576 | 3.260783219 | 0.003601776 | 0.026681021 | -1.988474471 |
| SLC9A9 | 1.23727459 | 2.759804294 | 3.260551951 | 0.003603743 | 0.026684722 | -1.988981956 |
| SRXN1 | 0.86321733 | 4.402843981 | 3.259962695 | 0.00360876 | 0.026705883 | -1.990274944 |
| SOX4 | 1.139193158 | 5.143462782 | 3.259871338 | 0.003609538 | 0.026705883 | -1.9904754 |
| IFNGR1 | 0.800166388 | 6.937461975 | 3.25861451 | 0.003620262 | 0.026774336 | -1.993232953 |
| VRK3 | 0.871158468 | 5.667948714 | 3.257990778 | 0.003625596 | 0.026802882 | -1.99460133 |
| PLB1 | 0.938185808 | 1.555691872 | 3.257746128 | 0.00362769 | 0.026807466 | -1.995138034 |
| SLC12A6 | 1.033917893 | 3.462674008 | 3.25710784 | 0.003633159 | 0.026835535 | -1.996538225 |
| H2AC18 | 1.58134657 | 7.148058562 | 3.256958528 | 0.00363444 | 0.026835535 | -1.996865754 |
| ASCL3 | 3.333954064 | 3.475691704 | 3.25612425 | 0.003641603 | 0.026877512 | -1.998695724 |
| SKA3 | 2.331153969 | 1.387073781 | 3.255940948 | 0.003643178 | 0.026878233 | -1.999097774 |
| DOK1 | 1.699349946 | 5.227252825 | 3.254737026 | 0.003653544 | 0.026943773 | -2.00173824 |
| TMEM229A | -4.295391299 | #NAME? | -4.308216013 | 0.00819304 | 0.043900597 | -2.002808948 |
| GPR84 | 2.301698183 | -0.45112266 | 3.253931066 | 0.003660499 | 0.026970159 | -2.003505714 |
| TAS1R1 | -1.0678016 | -0.933953449 | -3.253842106 | 0.003661267 | 0.026970159 | -2.003700794 |
| LBH | 1.281953083 | 5.921651968 | 3.253806971 | 0.003661571 | 0.026970159 | -2.003777843 |
| NPY5R | -2.803206239 | -0.925260312 | -3.253358321 | 0.003665449 | 0.026987795 | -2.004761662 |
| PDZRN3 | -1.354010188 | 2.389075695 | -3.251719467 | 0.00367965 | 0.027062775 | -2.008355044 |
| PTPN3 | 0.812506177 | 5.23643094 | 3.251561959 | 0.003681017 | 0.027062775 | -2.008700368 |
| BOC | -0.852460855 | 5.275355782 | -3.25149657 | 0.003681585 | 0.027062775 | -2.008843726 |
| CNPY3 | 0.620384458 | 6.571730298 | 3.251184611 | 0.003684296 | 0.027071757 | -2.009527653 |
| CEP162 | 0.968698253 | 3.095665927 | 3.250234575 | 0.003692562 | 0.027106706 | -2.011610346 |
| USP10 | 0.831421718 | 5.238494256 | 3.250124234 | 0.003693524 | 0.027106706 | -2.011852225 |
| TRAM1L1 | -1.403343883 | 0.855768558 | -3.248937915 | 0.003703874 | 0.027138861 | -2.014452601 |
| GP5 | 2.337485845 | -1.56102081 | 3.248151099 | 0.003710754 | 0.027178325 | -2.016177111 |
| STAM | 0.699544992 | 3.457631802 | 3.247556627 | 0.003715961 | 0.027198186 | -2.01747996 |
| ALS2 | 0.665551835 | 3.866575853 | 3.247500016 | 0.003716457 | 0.027198186 | -2.017604024 |
| KCTD17 | 1.146926634 | 3.697514253 | 3.246377384 | 0.003726311 | 0.027248365 | -2.020064171 |
| MARCHF11 | -2.191636279 | #NAME? | -5.069622929 | 0.007880987 | 0.043027208 | -2.02135665 |
| FAM110B | -1.094733364 | 1.805064706 | -3.245783971 | 0.003731529 | 0.0272646 | -2.021364472 |
| C3orf70 | -1.342381355 | 0.292810388 | -3.245098901 | 0.003737563 | 0.027297716 | -2.022865519 |
| LTA4H | 0.641016134 | 6.514499471 | 3.244924147 | 0.003739103 | 0.027298005 | -2.023248402 |
| SLC6A6 | 1.308288787 | 7.14738385 | 3.244182596 | 0.003745647 | 0.02733257 | -2.024873061 |
| CLIC3 | 1.576772515 | 3.749591287 | 3.244047177 | 0.003746844 | 0.02733257 | -2.025169735 |
| GPRC5A | 1.403611351 | 4.605161671 | 3.242979988 | 0.003756284 | 0.027390449 | -2.027507591 |
| S100A2 | 2.277751027 | 8.023858389 | 3.24149298 | 0.003769476 | 0.027453624 | -2.030764715 |
| SLC44A1 | 0.779352559 | 4.313382847 | 3.239328971 | 0.003788756 | 0.027524566 | -2.035503874 |
| UBE2S | 1.078408062 | 4.81587421 | 3.239239526 | 0.003789555 | 0.027524566 | -2.035699735 |
| GPRC5D | -1.46872081 | 0.01998011 | -3.239239215 | 0.003789557 | 0.027524566 | -2.035700416 |
| KPNB1 | 0.76515935 | 5.861809015 | 3.239228074 | 0.003789657 | 0.027524566 | -2.035724812 |
| TMTC2 | 1.036128161 | 4.132193068 | 3.238994187 | 0.003791747 | 0.027524566 | -2.036236955 |
| USP28 | 1.395147004 | 4.697550674 | 3.238993222 | 0.003791756 | 0.027524566 | -2.036239068 |
| IL7 | 1.238287456 | 2.301082243 | 3.238900997 | 0.00379258 | 0.027524566 | -2.036441011 |
| ZNF718 | 1.348526621 | 1.358757731 | 3.238489919 | 0.003796257 | 0.027524566 | -2.037341114 |
| SYN2 | -1.035799563 | -0.382075094 | -3.238479234 | 0.003796352 | 0.027524566 | -2.037364508 |
| MTDH | 0.735368225 | 5.009160037 | 3.238276032 | 0.003798171 | 0.027524566 | -2.037809429 |
| PAPSS2 | 0.963611163 | 4.70103474 | 3.238138283 | 0.003799404 | 0.027524566 | -2.038111033 |
| GLIS2 | 0.816287772 | 2.761570447 | 3.238026448 | 0.003800406 | 0.027524566 | -2.038355892 |
| CFAP161 | 3.043700958 | 3.967511459 | 3.236173738 | 0.003817038 | 0.027591438 | -2.042411969 |
| SLC13A4 | 1.463442345 | 0.677234634 | 3.236152871 | 0.003817225 | 0.027591438 | -2.042457648 |
| SRBD1 | 0.921038882 | 2.735067192 | 3.235933654 | 0.003819198 | 0.027594729 | -2.042937521 |
| SORL1 | 1.248683082 | 4.816247922 | 3.235746541 | 0.003820882 | 0.027595936 | -2.043347109 |
| STRN3 | 0.779448047 | 3.857116667 | 3.235054969 | 0.003827115 | 0.027629975 | -2.044860887 |
| PUDP | 0.949791123 | 4.191371657 | 3.234247366 | 0.003834405 | 0.027671623 | -2.046628512 |
| ARCN1 | 0.60223303 | 6.105172172 | 3.233766737 | 0.00383875 | 0.027691992 | -2.047680411 |
| WNK2 | -0.79873721 | 2.96009737 | -3.233318555 | 0.003842806 | 0.02771026 | -2.048661251 |
| S100A3 | 1.533164101 | 3.101024018 | 3.232096117 | 0.003853891 | 0.027756005 | -2.051336314 |
| TNFRSF18 | 1.595246212 | 4.952820569 | 3.231945893 | 0.003855255 | 0.027756005 | -2.051665028 |
| NMD3 | 0.623148914 | 4.838429198 | 3.231611772 | 0.003858291 | 0.027766871 | -2.052396116 |
| POLR3B | 0.719741573 | 2.524777622 | 3.230315077 | 0.003870096 | 0.027840808 | -2.05523318 |
| SCLY | 0.633005692 | 3.008879575 | 3.228611567 | 0.003885657 | 0.027930658 | -2.058959755 |
| DECR2 | -0.946421112 | 4.567158262 | -3.228220274 | 0.00388924 | 0.027945368 | -2.059815652 |
| SRPK1 | 0.901562647 | 4.94776819 | 3.225405618 | 0.003915108 | 0.028118911 | -2.065971308 |
| PRKX | 0.867992683 | 4.608006117 | 3.225171574 | 0.003917267 | 0.028118911 | -2.066483084 |
| PMF1-BGLAP | 1.074163218 | 2.757759557 | 3.224524468 | 0.003923241 | 0.028118911 | -2.067898023 |
| TGM1 | 1.538085599 | 3.759926918 | 3.224471397 | 0.003923731 | 0.028118911 | -2.068014063 |
| PLEKHG6 | 1.195850108 | 3.440073661 | 3.224093673 | 0.003927223 | 0.028118911 | -2.068839933 |
| KSR2 | 1.403107845 | -3.765414566 | 3.224078572 | 0.003927362 | 0.028118911 | -2.068872949 |
| CCNB1 | 2.005163855 | 4.046701505 | 3.22377893 | 0.003930135 | 0.028118911 | -2.069528076 |
| AP1B1 | 0.630723873 | 5.695471705 | 3.223740822 | 0.003930487 | 0.028118911 | -2.069611391 |
| PTK2B | 0.650608034 | 5.5798743 | 3.223397221 | 0.003933669 | 0.028118911 | -2.070362601 |
| APPBP2 | 0.656387181 | 3.940945343 | 3.223249234 | 0.00393504 | 0.028118911 | -2.070686133 |
| SPI1 | 1.282441699 | 4.498986854 | 3.222784242 | 0.00393935 | 0.028138658 | -2.07170268 |
| CDH22 | 2.221001013 | 1.218099616 | 3.222593549 | 0.003941119 | 0.028140243 | -2.072119551 |
| MED31 | 0.802151058 | 3.519687144 | 3.222041903 | 0.003946242 | 0.028165758 | -2.073325451 |
| CFL1 | 0.706598972 | 8.874921553 | 3.221298763 | 0.003953152 | 0.028190605 | -2.074949849 |
| INSIG2 | 0.592398107 | 3.799011252 | 3.221213728 | 0.003953944 | 0.028190605 | -2.075135716 |
| CD163 | 2.058323928 | 3.584159166 | 3.221167571 | 0.003954373 | 0.028190605 | -2.075236604 |
| BARX2 | -3.024546364 | 3.149379421 | -3.220839596 | 0.003957428 | 0.028201326 | -2.075953462 |
| CEP97 | 1.060751767 | 2.408242435 | 3.22045788 | 0.003960986 | 0.028215624 | -2.076787753 |
| GDF5 | -2.068174494 | -1.080817351 | -3.218679685 | 0.003977601 | 0.02829412 | -2.080673803 |
| BHLHA15 | -2.134067346 | 2.567097779 | -3.21819569 | 0.003982135 | 0.02829412 | -2.0817314 |
| FAM214A | 0.64610595 | 4.785340883 | 3.218114515 | 0.003982896 | 0.02829412 | -2.081908772 |
| TFAP2D | -1.282238305 | #NAME? | -3.929744745 | 0.008108387 | 0.043639871 | -2.083324621 |
| GFUS | 0.61412595 | 6.607915294 | 3.21740736 | 0.003989531 | 0.028330187 | -2.083453896 |
| NXPE2 | -1.84771669 | -2.826014402 | -3.216857005 | 0.003994702 | 0.028353255 | -2.084656338 |
| CPN2 | -0.938320967 | -1.892614035 | -3.216576862 | 0.003997337 | 0.028353255 | -2.08526838 |
| FOLR1 | -2.658976859 | 4.353669643 | -3.216516712 | 0.003997903 | 0.028353255 | -2.085399791 |
| ARFGEF1 | 0.848148582 | 4.389925097 | 3.216358917 | 0.003999388 | 0.028353255 | -2.085744523 |
| GLYCTK | 0.639790847 | 3.042409231 | 3.216133754 | 0.004001508 | 0.028353255 | -2.086236427 |
| PMAIP1 | 2.003853908 | 3.576248021 | 3.216055727 | 0.004002242 | 0.028353255 | -2.086406886 |
| DMRT2 | 1.561440361 | 4.670113683 | 3.215901758 | 0.004003693 | 0.028353255 | -2.086743244 |
| NUMBL | 0.740524342 | 3.258967353 | 3.215595145 | 0.004006583 | 0.028362677 | -2.087413052 |
| DNAJC16 | 0.64517904 | 3.434473484 | 3.214982161 | 0.004012367 | 0.028392569 | -2.088752072 |
| RAB37 | 1.37765632 | 4.376050568 | 3.214048081 | 0.004021196 | 0.02843292 | -2.090792347 |
| HNRNPK | 0.625603158 | 8.474994294 | 3.213009347 | 0.004031037 | 0.028491423 | -2.09306098 |
| ENO1 | 0.918710429 | 9.560693614 | 3.212535386 | 0.004035534 | 0.028512132 | -2.094096049 |
| ARF3 | 0.669658491 | 6.167663624 | 3.211884644 | 0.004041718 | 0.02854473 | -2.0955171 |
| SHOC2 | 0.646013584 | 4.368110875 | 3.210909063 | 0.004051005 | 0.028577028 | -2.097647338 |
| ATG9B | 1.643032535 | 0.917684104 | 3.209732782 | 0.004062231 | 0.028623629 | -2.100215531 |
| ATG4C | 0.596583839 | 3.504890405 | 3.209722075 | 0.004062333 | 0.028623629 | -2.100238907 |
| MORF4L2 | 0.62145348 | 7.724529801 | 3.208434948 | 0.004074651 | 0.028688193 | -2.103048751 |
| TM9SF1 | 0.653111321 | 6.108753395 | 3.207704405 | 0.004081659 | 0.02872641 | -2.104643386 |
| SYNCRIP | 1.028817798 | 5.973424378 | 3.207134547 | 0.004087133 | 0.028746913 | -2.105887192 |
| SLC25A45 | -0.777875085 | 3.651622765 | -3.205205345 | 0.004105719 | 0.028852037 | -2.110097441 |
| VPS35 | 0.811841013 | 6.100405025 | 3.203295637 | 0.004124198 | 0.028958555 | -2.114264313 |
| THAP8 | 0.650488018 | 2.326486515 | 3.202516054 | 0.004131764 | 0.029000487 | -2.11596508 |
| KCNK3 | -1.324018229 | -0.164366478 | -3.202041742 | 0.004136374 | 0.029011888 | -2.11699979 |
| BTBD9 | 0.924535713 | 2.434425526 | 3.202020699 | 0.004136579 | 0.029011888 | -2.117045694 |
| UGT1A6 | 2.48574505 | 6.436326242 | 3.201574008 | 0.004140925 | 0.029031176 | -2.1180201 |
| H2AX | 1.174918582 | 5.137864468 | 3.201035761 | 0.004146169 | 0.029053005 | -2.119194163 |
| NOXRED1 | 1.421663952 | 1.660386625 | 3.20081029 | 0.004148367 | 0.029053005 | -2.119685957 |
| MSL1 | 0.663116376 | 6.027821027 | 3.200762641 | 0.004148832 | 0.029053005 | -2.119789887 |
| AMN1 | 0.680593785 | 3.099575145 | 3.200389834 | 0.004152469 | 0.029067286 | -2.120603019 |
| CCER2 | -0.932166997 | 0.698169047 | -3.200095655 | 0.004155342 | 0.029076203 | -2.121244634 |
| MYO5B | 0.807275207 | 3.833298667 | 3.199740947 | 0.004158808 | 0.029085229 | -2.122018237 |
| ARNT2 | 1.086058277 | 1.522454332 | 3.199426774 | 0.004161881 | 0.02908838 | -2.122703409 |
| SEMA3C | 1.333601597 | 4.42056593 | 3.198989672 | 0.004166159 | 0.029095919 | -2.12365664 |
| PTBP1 | 0.695859766 | 6.845542016 | 3.198547032 | 0.004170496 | 0.029101712 | -2.124621903 |
| IQCA1 | 1.568097568 | 3.522710346 | 3.19841512 | 0.004171789 | 0.029101712 | -2.124909554 |
| EBF1 | -1.454712247 | 1.65836208 | -3.197395558 | 0.004181799 | 0.029149172 | -2.127132707 |
| SELPLG | 1.63099135 | 3.778767927 | 3.197137813 | 0.004184333 | 0.02915566 | -2.127694683 |
| MMP3 | 3.060564119 | -0.321917186 | 3.196420727 | 0.00419139 | 0.029193653 | -2.129258101 |
| PRSS8 | -0.774593031 | 6.012026098 | -3.195748606 | 0.004198016 | 0.029228607 | -2.13072338 |
| ACBD5 | 0.80872898 | 4.37724227 | 3.194439895 | 0.004210947 | 0.029296202 | -2.13357618 |
| AKT2 | 0.698282419 | 5.644436974 | 3.194009523 | 0.004215207 | 0.029313665 | -2.134514242 |
| P4HA2 | 0.904580198 | 4.24099649 | 3.193860813 | 0.00421668 | 0.029313665 | -2.134838369 |
| FOXD1 | -2.134669355 | -0.559092219 | -3.193096612 | 0.004224259 | 0.029353177 | -2.136503934 |
| LAMA5 | 1.270075165 | 5.511004123 | 3.192857514 | 0.004226632 | 0.029353177 | -2.137025016 |
| LUZP1 | 0.822182234 | 2.889442936 | 3.192799733 | 0.004227206 | 0.029353177 | -2.137150941 |
| BCL11B | 1.398146458 | 2.108387051 | 3.192271628 | 0.004232454 | 0.029378403 | -2.138301824 |
| THG1L | 0.647202028 | 3.559277429 | 3.19095325 | 0.004245584 | 0.029447514 | -2.141174642 |
| CES3 | -1.003374394 | 3.560828815 | -3.190946673 | 0.00424565 | 0.029447514 | -2.141188972 |
| SGMS1 | 0.716277361 | 4.355498062 | 3.190580059 | 0.004249308 | 0.029457186 | -2.141987773 |
| SLC35F5 | 0.727018535 | 4.841790758 | 3.189722494 | 0.004257876 | 0.029498568 | -2.143856165 |
| OSBPL3 | 1.036305859 | 3.987114781 | 3.189472361 | 0.004260379 | 0.029504665 | -2.144401104 |
| TKT | 1.387850665 | 7.17603103 | 3.188894836 | 0.004266162 | 0.029533471 | -2.14565924 |
| TM9SF3 | 0.723692168 | 6.6951723 | 3.187739231 | 0.004277757 | 0.029591212 | -2.148176489 |
| ACKR3 | 1.655865332 | 5.395180501 | 3.187154718 | 0.004283634 | 0.029610512 | -2.149449615 |
| DUSP23 | 0.738476073 | 6.776129641 | 3.186987263 | 0.004285319 | 0.029610512 | -2.149814333 |
| IMPA2 | 1.679137118 | 6.466395821 | 3.186268482 | 0.004292559 | 0.029632453 | -2.151379769 |
| ZC3H4 | 0.58569782 | 3.675026888 | 3.186130097 | 0.004293954 | 0.029632453 | -2.151681145 |
| RNF139 | 0.62398466 | 4.206854937 | 3.185221718 | 0.004303123 | 0.029676376 | -2.153659309 |
| WASF2 | 0.78966785 | 5.863464392 | 3.182331822 | 0.004332421 | 0.029821882 | -2.159951321 |
| RPA3 | 0.793013473 | 4.651948409 | 3.181686326 | 0.004338992 | 0.029849713 | -2.16135646 |
| SLC6A14 | 1.939330148 | 6.646921691 | 3.181475944 | 0.004341135 | 0.029849713 | -2.161814405 |
| ASF1B | 2.284693763 | 3.034378981 | 3.181451092 | 0.004341388 | 0.029849713 | -2.161868503 |
| CCDC126 | 0.808501688 | 3.138966285 | 3.18115323 | 0.004344425 | 0.029859303 | -2.162516849 |
| ATF6 | 0.741986189 | 4.006624089 | 3.180659149 | 0.004349467 | 0.029871377 | -2.163592255 |
| HCAR2 | 2.450207717 | 5.16448296 | 3.180255188 | 0.004353593 | 0.02987878 | -2.164471466 |
| GTPBP8 | 0.597120214 | 3.725266016 | 3.179910561 | 0.004357117 | 0.02987878 | -2.165221507 |
| NARS1 | 0.679114372 | 6.696927985 | 3.1792209 | 0.004364176 | 0.029915906 | -2.166722393 |
| EEF1AKMT1 | 0.692191411 | 4.075215728 | 3.178929996 | 0.004367157 | 0.02992506 | -2.167355445 |
| CHI3L2 | -3.198552857 | 1.78567776 | -3.178359521 | 0.004373008 | 0.029953869 | -2.168596828 |
| STARD4 | 1.296576455 | 3.148475147 | 3.177657072 | 0.004380223 | 0.029969429 | -2.17012529 |
| FCF1 | 1.02091136 | 5.121649121 | 3.176883877 | 0.004388179 | 0.030012569 | -2.171807555 |
| TWSG1 | 0.801545785 | 4.391139435 | 3.17594539 | 0.004397854 | 0.030067432 | -2.173849263 |
| ACOT7 | 1.01932774 | 4.704994471 | 3.17557313 | 0.004401697 | 0.030071099 | -2.174659069 |
| SAE1 | 0.765766416 | 5.828558595 | 3.175291669 | 0.004404605 | 0.030078695 | -2.175271331 |
| MAGOHB | 0.739291117 | 3.405703011 | 3.175145431 | 0.004406117 | 0.030078695 | -2.175589436 |
| NABP1 | 1.132746312 | 5.24248368 | 3.174427752 | 0.004413543 | 0.030109057 | -2.177150496 |
| SULF1 | 1.606533174 | 5.359860652 | 3.174141722 | 0.004416506 | 0.030113591 | -2.17777262 |
| PARP1 | 0.767930539 | 5.958995298 | 3.17396072 | 0.004418382 | 0.030113591 | -2.178166296 |
| RPP25L | 0.606503254 | 5.112182586 | 3.173852114 | 0.004419508 | 0.030113591 | -2.178402507 |
| CHORDC1 | 0.883685846 | 4.424918004 | 3.173602832 | 0.004422094 | 0.030119924 | -2.178944672 |
| APPL2 | 1.106408584 | 5.913758593 | 3.172848368 | 0.004429928 | 0.030150654 | -2.180585468 |
| MOCS3 | 0.743853268 | 2.696258714 | 3.172685541 | 0.004431621 | 0.030150654 | -2.180939564 |
| LOXL3 | 1.41540211 | 2.942234307 | 3.172625075 | 0.004432249 | 0.030150654 | -2.181071057 |
| ATP6V1B1 | 1.746524926 | 3.528636126 | 3.172175326 | 0.004436928 | 0.030164478 | -2.182049077 |
| CDC7 | 1.308665295 | 2.80820065 | 3.17107972 | 0.004448347 | 0.030211666 | -2.184431373 |
| MLLT3 | 0.595463053 | 2.557732977 | 3.171031183 | 0.004448853 | 0.030211666 | -2.184536907 |
| LILRB4 | 1.719233412 | 2.227701277 | 3.170422146 | 0.004455213 | 0.030235901 | -2.185861072 |
| RGS6 | -2.731262944 | -1.391390404 | -3.169873555 | 0.00446095 | 0.030237359 | -2.187053743 |
| PHTF1 | 1.12393088 | 4.316443193 | 3.169434926 | 0.004465542 | 0.030257207 | -2.188007298 |
| CEACAM5 | 3.840490912 | 6.538743581 | 3.16914405 | 0.004468589 | 0.03026658 | -2.188639622 |
| SLC3A1 | -2.664980255 | -0.407046097 | -3.168542419 | 0.004474899 | 0.030291241 | -2.189947421 |
| C16orf87 | 0.836124504 | 2.34206505 | 3.168373758 | 0.00447667 | 0.030291241 | -2.190314033 |
| C22orf15 | 3.224007997 | 4.947630509 | 3.168320654 | 0.004477227 | 0.030291241 | -2.190429462 |
| TGIF1 | 0.867729945 | 5.967027403 | 3.16785623 | 0.004482106 | 0.030301706 | -2.191438922 |
| NSD1 | 0.80407758 | 3.671573972 | 3.167614932 | 0.004484644 | 0.030307591 | -2.191963381 |
| CLDN16 | 1.395862618 | 2.151071851 | 3.166868245 | 0.004492503 | 0.03034943 | -2.193586215 |
| GPR39 | 1.24428602 | 0.658638663 | 3.16476547 | 0.004514709 | 0.030465492 | -2.198155628 |
| CTF1 | 0.944497121 | 3.516489634 | 3.164551681 | 0.004516973 | 0.030465748 | -2.198620143 |
| LRP11 | 1.149837901 | 6.520939962 | 3.164287369 | 0.004519773 | 0.030465748 | -2.199194415 |
| SKP2 | 0.885704568 | 3.736655379 | 3.163705933 | 0.004525938 | 0.030496004 | -2.200457649 |
| KBTBD4 | 0.752424448 | 4.701772261 | 3.163098185 | 0.004532392 | 0.030528175 | -2.201777962 |
| LILRB3 | 1.134919565 | 1.89932872 | 3.162911879 | 0.004534372 | 0.030530204 | -2.202182689 |
| GTF2A1 | 0.770062581 | 3.643506757 | 3.162187687 | 0.004542076 | 0.030534664 | -2.203755827 |
| ARHGAP42 | 0.870937915 | 1.492819964 | 3.162082483 | 0.004543196 | 0.030534664 | -2.203984348 |
| TNFRSF10B | 0.892459484 | 4.99079313 | 3.161347882 | 0.004551027 | 0.030574425 | -2.205579952 |
| ENPEP | 1.154816168 | 3.157521084 | 3.161017126 | 0.004554556 | 0.030585842 | -2.206298335 |
| KLF10 | 1.138228258 | 5.673219308 | 3.160873527 | 0.00455609 | 0.030585842 | -2.206610216 |
| RNASE13 | -1.405261128 | #NAME? | -3.389003945 | 0.006158612 | 0.037012727 | -2.209302891 |
| PNPLA8 | 0.648321591 | 4.12122682 | 3.158988611 | 0.004576262 | 0.030682907 | -2.210703583 |
| CBX8 | 0.704559453 | 2.377666042 | 3.15889213 | 0.004577297 | 0.030682907 | -2.210913082 |
| ANLN | 2.906895542 | 2.454562428 | 3.158390656 | 0.00458268 | 0.030701304 | -2.212001953 |
| RP2 | 1.001563187 | 3.031774989 | 3.158321925 | 0.004583418 | 0.030701304 | -2.212151185 |
| DENND11 | 1.158908622 | 2.739513475 | 3.157922365 | 0.004587712 | 0.030718751 | -2.213018715 |
| NUAK2 | 1.213491954 | 4.260427175 | 3.1572105 | 0.004595371 | 0.030758713 | -2.214564234 |
| NECTIN1 | 1.403782538 | 4.938765324 | 3.15682922 | 0.004599479 | 0.03077488 | -2.215391975 |
| CCL14 | -2.01284486 | 5.397508283 | -3.156558374 | 0.004602399 | 0.030783092 | -2.215979946 |
| CBX6 | 0.736452496 | 3.809455975 | 3.156015094 | 0.004608261 | 0.030787232 | -2.217159284 |
| BRI3BP | 0.998911263 | 3.083283432 | 3.155783415 | 0.004610764 | 0.030787232 | -2.217662188 |
| RAB11A | 0.599816089 | 6.369269239 | 3.155716886 | 0.004611482 | 0.030787232 | -2.217806598 |
| LOC107987545 | 1.483055585 | #NAME? | 3.190616319 | 0.00484958 | 0.031747469 | -2.218401912 |
| INA | 1.794223228 | #NAME? | 3.165745659 | 0.004687587 | 0.031169152 | -2.218990586 |
| BMT2 | 0.659318627 | 2.760875002 | 3.155096886 | 0.004618186 | 0.030820674 | -2.21915235 |
| LARS2 | 0.77565128 | 3.21063484 | 3.154430772 | 0.004625399 | 0.030857487 | -2.220598091 |
| TLR3 | 0.934864667 | 2.518949845 | 3.152679787 | 0.004644411 | 0.030961608 | -2.224397945 |
| CCDC91 | 0.652629155 | 4.589810205 | 3.152520605 | 0.004646144 | 0.030961806 | -2.224743353 |
| HNRNPU | 0.6713556 | 6.826786601 | 3.152327523 | 0.004648245 | 0.030964466 | -2.225162314 |
| TFDP1 | 0.709618986 | 5.816895153 | 3.15200974 | 0.004651707 | 0.030976177 | -2.225851836 |
| GGN | 1.291856811 | -1.433027598 | 3.149599122 | 0.004678045 | 0.03112877 | -2.231081583 |
| PEDS1 | 0.605642229 | 3.650383133 | 3.149419897 | 0.004680009 | 0.031130448 | -2.231470351 |
| RAB40C | 0.761253669 | 5.120529388 | 3.148546956 | 0.004689586 | 0.031169152 | -2.233363783 |
| CLOCK | 0.627392537 | 2.627257835 | 3.148391775 | 0.004691291 | 0.031169152 | -2.233700356 |
| AGFG1 | 0.755249559 | 3.583256717 | 3.148265029 | 0.004692683 | 0.031169152 | -2.233975251 |
| BPIFB6 | -2.781863004 | #NAME? | -3.275636631 | 0.005591912 | 0.034791143 | -2.23433135 |
| RB1CC1 | 0.712047936 | 4.375318048 | 3.147774595 | 0.004698076 | 0.031182191 | -2.235038901 |
| STK17A | 0.91478041 | 4.910180353 | 3.147145033 | 0.004705007 | 0.031213237 | -2.236404206 |
| IPMK | 0.896906489 | 2.756223554 | 3.147037996 | 0.004706186 | 0.031213237 | -2.236636324 |
| SENP8 | 0.635484192 | 2.056008434 | 3.146874034 | 0.004707993 | 0.031213839 | -2.236991881 |
| VAV1 | 1.089671717 | 4.368014617 | 3.146571373 | 0.004711331 | 0.031224584 | -2.237648196 |
| CCNP | 1.583434957 | -0.779059816 | 3.146182409 | 0.004715623 | 0.031233977 | -2.238491626 |
| CRTAC1 | -2.549921896 | -0.686236506 | -3.14613172 | 0.004716183 | 0.031233977 | -2.238601536 |
| CDC42EP2 | 1.119537223 | 3.94794764 | 3.14530873 | 0.004725279 | 0.031278545 | -2.240385978 |
| TCEANC2 | 0.784446528 | 2.210779082 | 3.14505631 | 0.004728072 | 0.031278545 | -2.24093325 |
| CORO2A | 0.810463657 | 4.543663824 | 3.144091103 | 0.004738768 | 0.031337903 | -2.243025784 |
| TUBG1 | 0.941158134 | 5.035507882 | 3.143627734 | 0.004743911 | 0.03136051 | -2.244030271 |
| ZNF473 | 0.990665259 | 2.776435349 | 3.143040935 | 0.004750432 | 0.031392205 | -2.245302254 |
| EZR | 1.135488972 | 8.814463594 | 3.142691936 | 0.004754314 | 0.031406448 | -2.246058727 |
| KIF23 | 2.493421442 | 2.072166702 | 3.142533757 | 0.004756075 | 0.031406671 | -2.246401578 |
| FAM98B | 0.745375845 | 4.299489222 | 3.141710992 | 0.004765242 | 0.031437101 | -2.248184814 |
| SECTM1 | 1.299723334 | 4.46843779 | 3.141430944 | 0.004768367 | 0.031442176 | -2.248791746 |
| MAGI3 | 0.914506778 | 2.97136318 | 3.140974062 | 0.004773468 | 0.031464407 | -2.249781874 |
| CCL18 | 5.338263799 | 2.58280057 | 3.140284806 | 0.004781175 | 0.031503784 | -2.251275499 |
| FAR1 | 0.940876604 | 5.013840475 | 3.139976153 | 0.00478463 | 0.03151513 | -2.251944314 |
| LRRC59 | 0.769502564 | 6.047158597 | 3.139120919 | 0.004794215 | 0.031566834 | -2.253797388 |
| BAIAP2L2 | -0.674002952 | 1.891112702 | -3.138836626 | 0.004797405 | 0.031568856 | -2.25441334 |
| PIF1 | 2.141826921 | 1.315693934 | 3.137604335 | 0.004811259 | 0.031631888 | -2.257083004 |
| LYVE1 | 2.825064599 | 1.407874004 | 3.137468146 | 0.004812792 | 0.031631888 | -2.257378023 |
| EED | 0.598328067 | 4.678666461 | 3.136791466 | 0.004820418 | 0.031660691 | -2.25884382 |
| RGS14 | 0.88154285 | 4.202932674 | 3.13671998 | 0.004821224 | 0.031660691 | -2.258998664 |
| PIM1 | 1.412915175 | 4.45737778 | 3.136607723 | 0.00482249 | 0.031660691 | -2.259241817 |
| ZDHHC3 | 0.628054031 | 5.616135076 | 3.136461715 | 0.004824138 | 0.031660691 | -2.259558073 |
| DLAT | 1.007670774 | 4.325209812 | 3.135958426 | 0.004829822 | 0.03167513 | -2.260648162 |
| PRIMPOL | 0.593715012 | 4.141216594 | 3.135766562 | 0.00483199 | 0.031677928 | -2.261063711 |
| EP400 | 0.644027321 | 3.683693929 | 3.135525063 | 0.004834721 | 0.031684408 | -2.261586748 |
| KLK13 | 2.561350437 | 0.692802118 | 3.135181307 | 0.00483861 | 0.031698475 | -2.26233123 |
| ANGPTL8 | -1.50872004 | #NAME? | -3.168889097 | 0.005090678 | 0.032841106 | -2.263585313 |
| SHC1 | 0.692963525 | 6.264520613 | 3.134451439 | 0.004846879 | 0.031741208 | -2.263911826 |
| CHMP7 | 0.601054853 | 5.295643078 | 3.133204792 | 0.004861033 | 0.031810992 | -2.266611256 |
| PBX2 | 0.748140653 | 5.451213818 | 3.132935859 | 0.004864092 | 0.031819558 | -2.267193542 |
| PLSCR1 | 1.113287597 | 6.280891992 | 3.132531669 | 0.004868692 | 0.031838201 | -2.268068646 |
| OTUD6B | 0.7708272 | 2.898720087 | 3.131867207 | 0.004876264 | 0.031865585 | -2.269507175 |
| ELAPOR1 | -1.439695386 | 5.885878187 | -3.131761405 | 0.004877471 | 0.031865585 | -2.269736222 |
| ERI1 | 0.769448358 | 3.00628204 | 3.131703082 | 0.004878136 | 0.031865585 | -2.269862482 |
| GALC | 0.820800445 | 4.449475111 | 3.131072212 | 0.004885339 | 0.031889724 | -2.271228163 |
| PGD | 0.850420249 | 7.128039212 | 3.130367913 | 0.004893392 | 0.031919377 | -2.272752682 |
| MYCL | 1.450736632 | 3.38604551 | 3.129572514 | 0.004902502 | 0.031955877 | -2.274474249 |
| STT3B | 0.679040576 | 6.286198956 | 3.128995646 | 0.004909119 | 0.031976089 | -2.27572273 |
| FGFBP3 | -0.662539676 | 1.221392337 | -3.128190979 | 0.004918364 | 0.03202133 | -2.277464086 |
| LAT2 | 1.234787905 | 3.412614951 | 3.128084696 | 0.004919586 | 0.03202133 | -2.277694076 |
| MDM2 | 0.72498538 | 4.953587474 | 3.127445993 | 0.004926938 | 0.032041703 | -2.279076145 |
| KANK3 | -1.239950895 | 2.723386976 | -3.127353657 | 0.004928002 | 0.032041703 | -2.279275939 |
| FHL5 | -2.201865461 | -0.090515887 | -3.125807314 | 0.004945849 | 0.032120889 | -2.282621569 |
| OBP2B | -1.71844658 | #NAME? | -3.409017343 | 0.00795227 | 0.043222774 | -2.282653301 |
| IPO11 | 0.969485912 | 3.748318922 | 3.125686514 | 0.004947246 | 0.032120889 | -2.282882903 |
| BPIFB4 | -4.377476927 | 2.027725314 | -3.125322695 | 0.004951455 | 0.032136745 | -2.283669957 |
| G6PD | 0.775353686 | 5.193984348 | 3.124597005 | 0.004959861 | 0.032168343 | -2.285239751 |
| TNFSF10 | 0.916482338 | 8.026584869 | 3.124319527 | 0.004963079 | 0.032177738 | -2.285839951 |
| DSG2 | 1.18535439 | 4.293465853 | 3.123568482 | 0.004971799 | 0.032222785 | -2.287464404 |
| CSTF2T | 0.705375452 | 4.189430014 | 3.121719109 | 0.004993334 | 0.032339306 | -2.291463867 |
| ABCD3 | 0.605452842 | 6.11696556 | 3.121283992 | 0.004998414 | 0.032360681 | -2.292404728 |
| CNTRL | 1.044577917 | 3.742447368 | 3.120518874 | 0.005007358 | 0.032407053 | -2.294059045 |
| PTGER4 | 0.868621286 | 3.620763202 | 3.119539394 | 0.005018831 | 0.032458203 | -2.29617664 |
| CEP192 | 0.954696033 | 3.082310117 | 3.119249476 | 0.005022232 | 0.032458952 | -2.296803385 |
| RNF26 | 0.653337497 | 4.264171338 | 3.115852482 | 0.005062246 | 0.032692473 | -2.30414545 |
| CEP135 | 1.04936768 | 2.375543752 | 3.115304075 | 0.005068735 | 0.03271644 | -2.305330476 |
| LYPD6B | 1.612666611 | 5.950170291 | 3.115234773 | 0.005069555 | 0.03271644 | -2.305480223 |
| GABRG3 | -1.334830211 | -0.219800918 | -3.112274162 | 0.005104729 | 0.032908399 | -2.311876315 |
| CLIC1 | 0.602481737 | 9.257679638 | 3.112062049 | 0.005107258 | 0.032913035 | -2.31233448 |
| RALGAPB | 0.58791484 | 4.239130005 | 3.111703073 | 0.00511154 | 0.032928967 | -2.313109845 |
| P2RX2 | -2.195294719 | -2.72218575 | -3.110959203 | 0.005120426 | 0.032962399 | -2.314716449 |
| FCER1G | 1.436013181 | 5.294119018 | 3.110813585 | 0.005122168 | 0.032962399 | -2.315030936 |
| MRC1 | 1.590935817 | 2.506196184 | 3.11038639 | 0.005127279 | 0.032983621 | -2.315953512 |
| FARP1 | 0.634787091 | 4.868693234 | 3.110186918 | 0.005129667 | 0.032987317 | -2.316384277 |
| FLNB | 0.615579218 | 5.74936853 | 3.10907541 | 0.005142996 | 0.033037982 | -2.31878443 |
| NYNRIN | 0.971581376 | 4.500871078 | 3.108839155 | 0.005145833 | 0.033044536 | -2.319294551 |
| IFI27L2 | 0.93132866 | 6.448537534 | 3.107461686 | 0.005162406 | 0.033127567 | -2.322268502 |
| SANBR | 1.665436504 | 4.161117254 | 3.106031715 | 0.005179666 | 0.03321488 | -2.325355297 |
| ZBTB44 | 0.808340866 | 4.260332093 | 3.105762347 | 0.005182923 | 0.033224054 | -2.325936711 |
| TPD52L1 | -1.100602681 | 5.741225409 | -3.105384334 | 0.005187498 | 0.033241661 | -2.326752595 |
| CHRM4 | 2.422705683 | -0.697438655 | 3.104441134 | 0.005198929 | 0.033274915 | -2.32878819 |
| RMND5A | 0.667773274 | 3.876442501 | 3.104403695 | 0.005199383 | 0.033274915 | -2.328868988 |
| MTRF1L | 0.590153029 | 3.763487157 | 3.103450873 | 0.005210957 | 0.033325388 | -2.330925115 |
| NAMPT | 1.237068434 | 5.794015998 | 3.103401379 | 0.005211559 | 0.033325388 | -2.331031913 |
| NEDD1 | 0.991562848 | 3.330985301 | 3.103105884 | 0.005215153 | 0.033336653 | -2.331669522 |
| CEP104 | 0.781805653 | 3.771581437 | 3.102337845 | 0.005224508 | 0.033384714 | -2.333326665 |
| ABHD13 | 0.676940715 | 3.087529219 | 3.101981916 | 0.005228848 | 0.033400714 | -2.334094579 |
| VAMP7 | 0.636729441 | 4.541863229 | 3.10069624 | 0.005244556 | 0.033470267 | -2.336868144 |
| ROGDI | 0.87460476 | 5.884694357 | 3.100638887 | 0.005245258 | 0.033470267 | -2.33699186 |
| FRYL | 0.657562038 | 3.357552468 | 3.099459825 | 0.005259705 | 0.033550683 | -2.339535045 |
| PLXDC1 | 1.007734983 | 2.657382544 | 3.098678123 | 0.005269305 | 0.033588353 | -2.341220948 |
| DHRS9 | 2.398578634 | 7.237712499 | 3.098073838 | 0.005276737 | 0.033618944 | -2.342524108 |
| SRD5A1 | 0.763500038 | 2.782857245 | 3.097987398 | 0.005277801 | 0.033618944 | -2.342710512 |
| MGST2 | 0.631889564 | 7.096197661 | 3.09753863 | 0.005283328 | 0.033642368 | -2.343678223 |
| ARL4C | 1.083529189 | 4.604172517 | 3.097317501 | 0.005286054 | 0.033647942 | -2.344155042 |
| NPR3 | 1.480913843 | 0.1902916 | 3.097125302 | 0.005288424 | 0.03365125 | -2.34456947 |
| RAET1L | 3.981550277 | #NAME? | 3.054091452 | 0.006060204 | 0.036589618 | -2.345248406 |
| COL8A1 | 1.91786405 | 3.455650047 | 3.094673459 | 0.005318748 | 0.033750447 | -2.349855407 |
| PRELID2 | 0.842119689 | 1.86402213 | 3.094664487 | 0.00531886 | 0.033750447 | -2.349874747 |
| CYB5R4 | 0.619858002 | 3.000819248 | 3.094273786 | 0.005323707 | 0.033769426 | -2.350716919 |
| PLAC8 | 1.643325795 | 6.649640898 | 3.093083736 | 0.0053385 | 0.03385145 | -2.353281882 |
| DHX15 | 0.651023001 | 6.110004865 | 3.092734976 | 0.005342843 | 0.033864333 | -2.35403351 |
| SULF2 | 1.112746004 | 6.085172448 | 3.092021419 | 0.005351738 | 0.033899933 | -2.35557123 |
| DMRTA2 | 0.936415798 | 5.126943077 | 3.091470114 | 0.005358621 | 0.033931712 | -2.356759208 |
| CHD8 | 0.676371979 | 4.121376113 | 3.090914285 | 0.005365568 | 0.03396388 | -2.357956857 |
| KIFC1 | 2.188094039 | 2.903400742 | 3.0904272 | 0.005371664 | 0.033980684 | -2.359006318 |
| ATXN1 | 0.699252964 | 2.50845328 | 3.089046477 | 0.005388979 | 0.034052807 | -2.361980858 |
| C21orf91 | 0.975486019 | 3.28793466 | 3.088539408 | 0.005395352 | 0.034081233 | -2.363073131 |
| ITGAM | 1.691422151 | 2.157542585 | 3.087513437 | 0.005408268 | 0.034150959 | -2.365282967 |
| ZW10 | 0.673298078 | 4.062689603 | 3.087324941 | 0.005410644 | 0.034154105 | -2.365688938 |
| LEMD3 | 0.724147775 | 3.702401149 | 3.086151492 | 0.00542546 | 0.034223868 | -2.36821604 |
| KLHL9 | 0.780107574 | 3.852248795 | 3.084247596 | 0.005449581 | 0.034352193 | -2.372315458 |
| STX6 | 0.697467857 | 4.519184652 | 3.083429316 | 0.00545998 | 0.034381991 | -2.374077069 |
| HNRNPA1 | 0.626733829 | 8.888245691 | 3.081383285 | 0.005486065 | 0.034510403 | -2.37848106 |
| IPO8 | 0.596331196 | 4.275181564 | 3.081193463 | 0.005488491 | 0.034513727 | -2.378889589 |
| STAC2 | -1.681935207 | 0.966168353 | -3.080204255 | 0.005501151 | 0.034550484 | -2.381018378 |
| POR | 0.898878172 | 7.784397882 | 3.080199009 | 0.005501218 | 0.034550484 | -2.381029669 |
| CNBD2 | 1.079144913 | -0.496873116 | 3.079325833 | 0.005512417 | 0.034583742 | -2.382908546 |
| PAWR | 0.722251125 | 4.50392212 | 3.079285322 | 0.005512937 | 0.034583742 | -2.382995711 |
| FOXA1 | 1.186995371 | 6.304793081 | 3.078475281 | 0.005523346 | 0.034602749 | -2.384738552 |
| DNAAF2 | 0.85658506 | 4.50208744 | 3.078444159 | 0.005523747 | 0.034602749 | -2.384805508 |
| TEDC2 | 1.50041109 | 1.708860778 | 3.077986543 | 0.005529636 | 0.034602749 | -2.385790012 |
| AKIRIN1 | 0.652554655 | 5.797925475 | 3.077746621 | 0.005532726 | 0.034602749 | -2.386306152 |
| MFSD14B | 0.718076108 | 5.606377972 | 3.076074458 | 0.005554309 | 0.034664605 | -2.389903036 |
| TDP2 | 0.604608188 | 6.121403142 | 3.075564842 | 0.005560903 | 0.034681272 | -2.390999097 |
| BACH1 | 0.712510678 | 3.49503723 | 3.075221941 | 0.005565345 | 0.034697071 | -2.391736554 |
| SPG11 | 0.636486693 | 4.916392933 | 3.075058788 | 0.005567459 | 0.034698357 | -2.392087428 |
| RGS7 | 2.638538361 | -0.05684768 | 3.074634591 | 0.00557296 | 0.034719642 | -2.392999664 |
| MNAT1 | 0.653437959 | 5.708948017 | 3.074387665 | 0.005576164 | 0.034719642 | -2.393530658 |
| TMEM200A | 1.87892277 | 3.78116869 | 3.073357023 | 0.005589558 | 0.034788398 | -2.395746795 |
| PDCL | 0.599368013 | 3.898995977 | 3.072860762 | 0.005596018 | 0.034804784 | -2.396813782 |
| WDHD1 | 1.331942048 | 1.256100907 | 3.072435709 | 0.005601557 | 0.034827324 | -2.397727616 |
| PDP1 | 1.208927439 | 4.434312051 | 3.071741271 | 0.005610618 | 0.034863033 | -2.39922051 |
| THBS4 | -1.472799311 | -0.355013468 | -3.071594646 | 0.005612533 | 0.034863033 | -2.399535706 |
| APELA | 3.148075588 | 1.505086663 | 3.071554945 | 0.005613052 | 0.034863033 | -2.39962105 |
| LY6G5B | -0.628980586 | 4.111521257 | -3.071374179 | 0.005615414 | 0.034865796 | -2.400009629 |
| MARCHF7 | 0.76648934 | 5.376225823 | 3.070793047 | 0.005623013 | 0.034865985 | -2.401258786 |
| ANXA8L1 | 2.028502693 | 5.828107108 | 3.070785442 | 0.005623113 | 0.034865985 | -2.401275133 |
| PDLIM1 | 0.908238317 | 8.93311024 | 3.070276349 | 0.005629779 | 0.034895419 | -2.402369369 |
| LST1 | 1.226125326 | 4.524570161 | 3.069955233 | 0.005633987 | 0.034898765 | -2.403059533 |
| TNFSF14 | 1.704298938 | 1.719981539 | 3.069942315 | 0.005634157 | 0.034898765 | -2.403087297 |
| MAPK1 | 0.734765558 | 5.051684095 | 3.067942139 | 0.00566044 | 0.035025776 | -2.407385611 |
| COPB2 | 0.599953785 | 6.693557435 | 3.067359527 | 0.005668118 | 0.035060633 | -2.408637427 |
| FBXO40 | -0.9614793 | -2.415812126 | -3.067222208 | 0.005669929 | 0.035060633 | -2.408932462 |
| ZNF786 | 0.604935551 | 2.860651569 | 3.066583678 | 0.005678358 | 0.035082782 | -2.410304302 |
| GJB4 | 1.741878628 | 3.437914184 | 3.066031935 | 0.005685651 | 0.035104723 | -2.4114896 |
| DNMT3A | 0.825626163 | 3.708075751 | 3.06595182 | 0.00568671 | 0.035104723 | -2.411661703 |
| METTL15 | 0.656839497 | 3.58664864 | 3.065659066 | 0.005690584 | 0.035116718 | -2.412290583 |
| ZNF664-RFLNA | -1.401169044 | #NAME? | -3.346023051 | 0.010417056 | 0.050953356 | -2.412462956 |
| MOCOS | 0.807706303 | 2.552234934 | 3.065303713 | 0.00569529 | 0.03513056 | -2.413053902 |
| EDN2 | 4.152886141 | 3.478928351 | 3.065197987 | 0.005696691 | 0.03513056 | -2.413281002 |
| MEIOSIN | -0.862030816 | #NAME? | -3.344334549 | 0.010442927 | 0.051052438 | -2.414616965 |
| ZNF146 | 0.720264267 | 5.612917305 | 3.064250413 | 0.005709261 | 0.035162547 | -2.415316263 |
| DNAH11 | 3.365590305 | 1.593518649 | 3.063961197 | 0.005713103 | 0.035172134 | -2.415937413 |
| C11orf49 | 0.934372336 | 5.656047563 | 3.062968395 | 0.00572631 | 0.035229589 | -2.41806949 |
| FAM83H | 0.894792502 | 4.685024844 | 3.062691987 | 0.005729992 | 0.035233732 | -2.418663041 |
| CPT1A | 0.845434931 | 4.867045095 | 3.062627004 | 0.005730858 | 0.035233732 | -2.41880258 |
| SLC51A | 1.615272392 | 4.638003877 | 3.061123556 | 0.005750929 | 0.035345182 | -2.422030659 |
| BUB3 | 0.758353841 | 5.8841565 | 3.06073323 | 0.005756151 | 0.035354082 | -2.422868638 |
| IDH2 | 0.613176086 | 7.556070118 | 3.060724701 | 0.005756265 | 0.035354082 | -2.422886949 |
| KY | -1.3470128 | -1.461257805 | -3.060070853 | 0.005765023 | 0.035395918 | -2.424290583 |
| IL5RA | 2.404291818 | 2.751963051 | 3.059050561 | 0.005778715 | 0.035444084 | -2.426480649 |
| FRMD1 | 1.419327889 | #NAME? | 3.078511534 | 0.005962753 | 0.036230747 | -2.427011531 |
| CSF1R | 1.476841983 | 3.983863073 | 3.058309322 | 0.005788682 | 0.035493245 | -2.428071555 |
| TMEM170A | 0.690097017 | 3.855999891 | 3.056620472 | 0.005811452 | 0.03562085 | -2.431695754 |
| NT5DC1 | 0.651606964 | 4.548052247 | 3.055377573 | 0.005828265 | 0.035699838 | -2.434362481 |
| PLCB2 | 1.405538264 | 4.019978087 | 3.054970696 | 0.005833779 | 0.035721581 | -2.435235376 |
| MILR1 | 1.030261528 | 2.884005729 | 3.054556189 | 0.005839401 | 0.035722977 | -2.436124594 |
| GREB1 | -0.78541994 | 0.042232477 | -3.054349627 | 0.005842205 | 0.035725064 | -2.436567702 |
| VCPIP1 | 0.708932222 | 2.632904443 | 3.052269686 | 0.00587051 | 0.035849933 | -2.441028883 |
| LEPROTL1 | 0.708575904 | 4.720467112 | 3.051764576 | 0.005877404 | 0.035860369 | -2.442112099 |
| OSBPL10 | 0.603452045 | 4.150858575 | 3.050313395 | 0.005897253 | 0.035946723 | -2.445223805 |
| YME1L1 | 0.602687879 | 5.985447645 | 3.050242872 | 0.00589822 | 0.035946723 | -2.445375009 |
| MRPL53 | 0.633558236 | 6.859737383 | 3.049760513 | 0.005904833 | 0.035974971 | -2.446409178 |
| ESRRA | 0.690401391 | 5.747724325 | 3.049428201 | 0.005909393 | 0.035990696 | -2.447121613 |
| IDUA | -0.585953313 | 5.036431325 | -3.048795872 | 0.005918079 | 0.036014122 | -2.448477165 |
| RTL6 | 0.839671182 | 3.358442316 | 3.048766762 | 0.005918479 | 0.036014122 | -2.448539568 |
| H2BC14 | 1.970508667 | #NAME? | 3.807265583 | 0.013262649 | 0.05939289 | -2.448618965 |
| RGS13 | 2.466078651 | 1.787770914 | 3.048656664 | 0.005919993 | 0.036014122 | -2.448775577 |
| GLTPD2 | 0.994376501 | 2.213573738 | 3.04857178 | 0.00592116 | 0.036014122 | -2.448957536 |
| PHF24 | -1.849228601 | #NAME? | -3.055987068 | 0.006033946 | 0.036492631 | -2.452850453 |
| ZNF134 | 0.717883296 | 2.805621892 | 3.046034433 | 0.005956158 | 0.036202768 | -2.454395739 |
| CHN2 | 1.164760031 | 3.775498514 | 3.044825428 | 0.005972903 | 0.036268186 | -2.456986352 |
| DNAJC13 | 0.736329891 | 3.755985716 | 3.044079794 | 0.005983253 | 0.036318907 | -2.458583877 |
| MROH6 | 1.365651985 | 2.930323466 | 3.043837753 | 0.005986617 | 0.036327199 | -2.459102418 |
| MS4A4A | 1.813705969 | 3.137933515 | 3.043449061 | 0.005992022 | 0.03633575 | -2.459935107 |
| CSNK2A1 | 0.76461256 | 3.846152242 | 3.043286966 | 0.005994278 | 0.036337311 | -2.46028235 |
| PTPN6 | 0.781604503 | 5.938938248 | 3.042389649 | 0.006006778 | 0.036388831 | -2.462204467 |
| FUT11 | 1.11729435 | 2.645762379 | 3.041074237 | 0.006025149 | 0.03646368 | -2.465021785 |
| PTPRO | 1.283342357 | 0.025199672 | 3.0407697 | 0.00602941 | 0.036477326 | -2.465673968 |
| SLC22A17 | -0.86232076 | 4.592418506 | -3.040040883 | 0.006039618 | 0.036514793 | -2.467234673 |
| TBC1D22B | 0.662447953 | 3.337700242 | 3.039741179 | 0.006043821 | 0.036528059 | -2.467876424 |
| ZNF543 | 0.97012939 | 1.48837077 | 3.039033209 | 0.00605376 | 0.036567149 | -2.469392291 |
| SPAG5 | 1.344685993 | 3.231180659 | 3.03899407 | 0.00605431 | 0.036567149 | -2.46947609 |
| EPHA7 | -2.76271003 | #NAME? | -3.047758373 | 0.00614873 | 0.03698927 | -2.470267897 |
| KRT27 | -2.040465504 | #NAME? | -3.095088467 | 0.006625886 | 0.038757919 | -2.470583127 |
| CAPN2 | 0.646483553 | 7.880042892 | 3.038393158 | 0.00606276 | 0.036589618 | -2.470762618 |
| EMP2 | 0.802711762 | 5.314154746 | 3.038300292 | 0.006064066 | 0.036589618 | -2.470961432 |
| ARHGAP21 | 0.839773259 | 4.731943435 | 3.035209065 | 0.00610772 | 0.03682858 | -2.477578017 |
| GOLGA8O | 2.944291469 | #NAME? | 2.999681052 | 0.00712122 | 0.040623119 | -2.479127674 |
| SLBP | 0.594520717 | 5.85246541 | 3.033696018 | 0.006129197 | 0.036912959 | -2.480815665 |
| DNAL1 | 1.145387774 | 4.090013926 | 3.033651332 | 0.006129833 | 0.036912959 | -2.480911275 |
| NCAPD3 | 0.964231303 | 2.944372695 | 3.0331932 | 0.006136351 | 0.036939978 | -2.481891468 |
| CRIM1 | 0.864439578 | 4.99381866 | 3.033020468 | 0.00613881 | 0.036942553 | -2.482261019 |
| RIOX1 | 0.652377169 | 3.36437441 | 3.032177543 | 0.006150824 | 0.03698927 | -2.484064305 |
| DENND2D | 0.983767875 | 5.587580103 | 3.032047876 | 0.006152675 | 0.03698927 | -2.484341686 |
| MS4A6A | 1.217853453 | 5.715543894 | 3.030601943 | 0.006173343 | 0.037076755 | -2.4874345 |
| TMED7 | 0.740098768 | 5.251162914 | 3.030199492 | 0.006179107 | 0.037093324 | -2.488295234 |
| HS2ST1 | 0.605423243 | 3.281426951 | 3.029669489 | 0.006186707 | 0.037120241 | -2.489428697 |
| ACTR3C | 0.728763181 | 3.360209139 | 3.029020984 | 0.006196018 | 0.037163845 | -2.490815485 |
| PADI3 | 2.886207165 | 2.854568572 | 3.028526341 | 0.006203128 | 0.037194228 | -2.491873172 |
| MGAT3 | 1.475604998 | 3.351256795 | 3.028155717 | 0.006208462 | 0.037201674 | -2.492665627 |
| EFR3A | 0.786117284 | 4.359118389 | 3.027833625 | 0.0062131 | 0.037217205 | -2.493354283 |
| TUBA3E | 1.593161615 | #NAME? | 3.046657855 | 0.00640705 | 0.03800346 | -2.493564641 |
| CLEC3B | -2.400333578 | 5.524284916 | -3.027629209 | 0.006216045 | 0.037222588 | -2.493791325 |
| AJUBA | 1.47506773 | 4.653905773 | 3.027011939 | 0.006224948 | 0.037263628 | -2.495110979 |
| PARP3 | 0.612813442 | 4.90948407 | 3.026237428 | 0.006236135 | 0.037306039 | -2.496766653 |
| TLCD2 | 0.625178705 | 3.26183748 | 3.025753028 | 0.006243142 | 0.037335674 | -2.497802071 |
| LAMC1 | 0.830192715 | 4.170696538 | 3.025600384 | 0.006245352 | 0.03733661 | -2.498128339 |
| KPNA3 | 0.835294688 | 4.81502116 | 3.025364274 | 0.006248771 | 0.03733895 | -2.498632999 |
| MTERF1 | 0.870765193 | 3.786322233 | 3.025289825 | 0.00624985 | 0.03733895 | -2.498792121 |
| KRT17 | 1.540098618 | 9.304962965 | 3.02394977 | 0.006269293 | 0.03743052 | -2.501656026 |
| OGFOD1 | 0.676092448 | 4.402504191 | 3.023231393 | 0.00627974 | 0.037460775 | -2.503191109 |
| RIC8B | 0.625477989 | 2.639085096 | 3.022081901 | 0.006296492 | 0.037543607 | -2.505647137 |
| SUZ12 | 0.694104566 | 4.487243796 | 3.021902459 | 0.006299111 | 0.037546912 | -2.506030503 |
| PKD1L3 | -1.645812773 | #NAME? | -3.040042208 | 0.006503263 | 0.038373895 | -2.507358049 |
| FBF1 | 0.662889424 | 3.691348417 | 3.020407084 | 0.006320976 | 0.037652561 | -2.509224937 |
| SNX13 | 0.666775652 | 3.528282928 | 3.017229776 | 0.006367677 | 0.037893513 | -2.516010305 |
| OVGP1 | -1.200299507 | 3.674049913 | -3.016145484 | 0.00638369 | 0.037976378 | -2.518325255 |
| TXNDC8 | 1.522650181 | -0.48439688 | 3.015949966 | 0.006386582 | 0.037981155 | -2.518742648 |
| NDUFS1 | 0.645752716 | 3.900797585 | 3.015645716 | 0.006391084 | 0.037989184 | -2.519392145 |
| CSDC2 | -2.827424078 | #NAME? | -3.023811196 | 0.006494892 | 0.038336935 | -2.520860091 |
| RAVER2 | -0.708672409 | 3.776002321 | -3.014784716 | 0.006403841 | 0.03800346 | -2.52123002 |
| GTF3C3 | 0.666550653 | 3.97129895 | 3.014643821 | 0.006405931 | 0.03800346 | -2.521530752 |
| COQ8A | -0.67894958 | 5.127466131 | -3.014248754 | 0.006411794 | 0.038019202 | -2.522373971 |
| NTN4 | 0.928698475 | 5.271570359 | 3.013430539 | 0.006423955 | 0.038057723 | -2.524120211 |
| NME4 | -0.696897164 | 5.994515113 | -3.013140672 | 0.006428268 | 0.038057723 | -2.524738801 |
| ACRBP | 1.098892176 | 1.066459171 | 3.013108022 | 0.006428754 | 0.038057723 | -2.524808478 |
| RPRD2 | 0.637623314 | 3.268467486 | 3.012658382 | 0.006435451 | 0.03808497 | -2.525767983 |
| ANKRD30A | -1.05997039 | #NAME? | -3.099237412 | 0.007399693 | 0.04144466 | -2.526456289 |
| PRPF40A | 0.661064131 | 5.189446007 | 3.009635732 | 0.006480644 | 0.038302567 | -2.532216694 |
| CCDC51 | 0.991001735 | 4.581176241 | 3.009262368 | 0.006486248 | 0.038318772 | -2.533013077 |
| CAPN1 | 0.758939603 | 7.651268295 | 3.007785685 | 0.006508456 | 0.038391496 | -2.536162457 |
| IL18 | 1.181678862 | 6.052033943 | 3.007512033 | 0.006512579 | 0.038391496 | -2.53674602 |
| OTUD4 | 0.92402333 | 3.979818146 | 3.00697033 | 0.006520749 | 0.038415032 | -2.537901138 |
| PMP2 | -2.762463404 | #NAME? | -3.093127945 | 0.007492238 | 0.041753054 | -2.538095713 |
| NXT2 | 0.75092521 | 3.412962139 | 3.006168678 | 0.006532858 | 0.038441718 | -2.53961042 |
| ADCY5 | -1.286073593 | 1.766879422 | -3.006107214 | 0.006533787 | 0.038441718 | -2.539741466 |
| ATP11B | 0.731198938 | 3.808984951 | 3.005801141 | 0.006538416 | 0.038441718 | -2.54039402 |
| ZBTB41 | 0.637500132 | 2.369013552 | 3.005785403 | 0.006538654 | 0.038441718 | -2.540427575 |
| HIVEP3 | 0.81943078 | 0.922493579 | 3.005688364 | 0.006540123 | 0.038441718 | -2.540634459 |
| S100P | 2.249753734 | 8.777053037 | 3.005376152 | 0.00654485 | 0.038457071 | -2.541300065 |
| LAMTOR5 | 0.69208061 | 8.391864428 | 3.00423158 | 0.006562206 | 0.038521716 | -2.543739961 |
| RTP4 | 0.964397568 | 4.355365322 | 3.003762459 | 0.006569332 | 0.03853867 | -2.544739884 |
| TCEAL5 | -2.109025362 | #NAME? | -3.021311954 | 0.006783303 | 0.039387337 | -2.546354914 |
| MAN1A2 | 0.636655914 | 3.626289466 | 3.002331311 | 0.006591119 | 0.038625155 | -2.547789976 |
| FAM53B | 0.657878217 | 4.781804375 | 3.001423799 | 0.00660497 | 0.038685344 | -2.54972379 |
| TLCD3A | 0.834036873 | 4.508905699 | 3.001251767 | 0.006607599 | 0.038688281 | -2.550090347 |
| FXYD6 | -1.499726806 | 3.219236354 | -3.000472484 | 0.00661952 | 0.038745606 | -2.551750698 |
| HNRNPH2 | 1.598889726 | 4.087968074 | 2.998744559 | 0.006646027 | 0.038851273 | -2.555431632 |
| ACTG2 | -3.450075735 | 2.835237735 | -2.998738604 | 0.006646118 | 0.038851273 | -2.555444316 |
| ZNF260 | 0.658727744 | 3.190346601 | 2.997394604 | 0.006666806 | 0.038955114 | -2.558306813 |
| EYA2 | 0.982349356 | 6.619813509 | 2.997306395 | 0.006668166 | 0.038955114 | -2.558494665 |
| ERCC6L | 2.043075773 | 0.013411696 | 2.99641708 | 0.006681892 | 0.039010236 | -2.560388459 |
| KLHDC7A | 1.449624928 | 3.121067627 | 2.996010754 | 0.006688172 | 0.03903437 | -2.561253655 |
| CD2AP | 0.674345766 | 4.495422377 | 2.995292998 | 0.00669928 | 0.039086654 | -2.562781872 |
| FAM83A | 2.542425794 | 1.555617596 | 2.995105967 | 0.006702177 | 0.039091017 | -2.563180066 |
| PRKCI | 0.594120106 | 4.585144432 | 2.994633296 | 0.006709505 | 0.039112432 | -2.564186355 |
| CTBS | 0.804259764 | 3.423920631 | 2.994591684 | 0.00671015 | 0.039112432 | -2.564274941 |
| HEPACAM2 | 1.630520251 | 2.52739483 | 2.994020156 | 0.006719021 | 0.039141769 | -2.565491598 |
| SSB | 0.647734563 | 7.483350924 | 2.99387608 | 0.006721259 | 0.039141769 | -2.565798291 |
| UBR5 | 0.663898428 | 4.722510032 | 2.99385158 | 0.00672164 | 0.039141769 | -2.565850442 |
| UBASH3B | 0.965174984 | 3.002626351 | 2.991425231 | 0.006759441 | 0.039336702 | -2.571014474 |
| NCSTN | 0.608796027 | 5.797768935 | 2.990733927 | 0.006770248 | 0.039372574 | -2.572485483 |
| GPX7 | 0.897547158 | 3.885234208 | 2.990406404 | 0.006775375 | 0.039372574 | -2.573182364 |
| KLF5 | 0.91503386 | 7.524415695 | 2.99031343 | 0.00677683 | 0.039372574 | -2.573380184 |
| ANKRD28 | 0.705336006 | 4.487607198 | 2.990246732 | 0.006777875 | 0.039372574 | -2.573522094 |
| DYNLL1 | 0.912727524 | 9.616805899 | 2.990200758 | 0.006778595 | 0.039372574 | -2.573619909 |
| RYR3 | -2.091727033 | -1.780718337 | -2.989449493 | 0.006790373 | 0.039415805 | -2.575218244 |
| LYRM2 | 0.621888206 | 3.992213347 | 2.987991127 | 0.006813291 | 0.039536222 | -2.578320496 |
| BBX | 0.734354727 | 3.410966138 | 2.987778396 | 0.006816641 | 0.03954304 | -2.578772971 |
| MELTF | -0.855855959 | 3.514566558 | -2.98710354 | 0.006827277 | 0.039592109 | -2.580208289 |
| MAD2L1 | 1.283601424 | 2.753343435 | 2.9858088 | 0.006847727 | 0.039698041 | -2.582961649 |
| TRA2B | 0.58580828 | 6.87041531 | 2.98530466 | 0.006855705 | 0.03973163 | -2.584033612 |
| SERPINA1 | 1.695716028 | 5.616296116 | 2.98401674 | 0.006876128 | 0.039824609 | -2.586771815 |
| COPG2 | 0.698534904 | 4.614702766 | 2.983804261 | 0.006879503 | 0.039827216 | -2.587223515 |
| FAM91A1 | 0.608379691 | 4.309181564 | 2.983608039 | 0.006882622 | 0.039827216 | -2.587640643 |
| NPY1R | -2.273528743 | 2.108479849 | -2.983574889 | 0.006883149 | 0.039827216 | -2.587711111 |
| CD99L2 | 0.712518587 | 5.258612887 | 2.983421114 | 0.006885593 | 0.03982869 | -2.588037996 |
| TNIP3 | 1.653014703 | -0.109413074 | 2.982645073 | 0.006897944 | 0.039872982 | -2.589687554 |
| IRX1 | -2.871570314 | #NAME? | -2.990511254 | 0.007007619 | 0.040252863 | -2.59096828 |
| RAB3GAP2 | 0.699412298 | 3.251810227 | 2.981767838 | 0.006911931 | 0.03990488 | -2.591552004 |
| RBMX | 0.615700538 | 7.527301897 | 2.98146754 | 0.006916725 | 0.039911926 | -2.5921902 |
| IL20RB | 1.841195146 | 5.23333974 | 2.981139711 | 0.006921962 | 0.039911926 | -2.592886874 |
| ILDR1 | 0.848241975 | 4.168707215 | 2.981004454 | 0.006924124 | 0.039911926 | -2.593174301 |
| EEF1AKMT4 | 0.732959689 | 2.899283366 | 2.980506067 | 0.006932096 | 0.039945217 | -2.594233354 |
| AGO2 | 0.733941918 | 2.639124685 | 2.979010189 | 0.006956077 | 0.040045333 | -2.597411611 |
| ZBTB6 | 0.815839494 | 2.801301271 | 2.978248972 | 0.00696831 | 0.040103065 | -2.599028709 |
| TMEM106A | 0.761868222 | 2.612221619 | 2.977175319 | 0.0069856 | 0.04017714 | -2.60130925 |
| MGAT1 | 0.592812136 | 6.734209214 | 2.976356751 | 0.006998809 | 0.04021923 | -2.603047744 |
| C22orf23 | 1.007660833 | 4.451876556 | 2.976310748 | 0.006999552 | 0.04021923 | -2.603145442 |
| RND3 | 1.075445105 | 5.953843496 | 2.975587568 | 0.007011244 | 0.040256093 | -2.604681182 |
| CCR1 | 1.931486917 | 1.749962214 | 2.97550322 | 0.007012609 | 0.040256093 | -2.604860292 |
| CRISP2 | -3.798535146 | #NAME? | -2.992843342 | 0.007231379 | 0.040999895 | -2.605468188 |
| DENND4A | 0.911391223 | 3.153041986 | 2.975158215 | 0.007018194 | 0.040275442 | -2.605592881 |
| KIAA1671 | 1.049894787 | 4.681994131 | 2.974653987 | 0.007026365 | 0.040309611 | -2.606663507 |
| IPP | 0.923216587 | 2.677713509 | 2.974234999 | 0.007033161 | 0.04032316 | -2.607553087 |
| SELENOV | -1.082809984 | #NAME? | -3.330209639 | 0.01298757 | 0.058578901 | -2.609910785 |
| ADGRE1 | 2.332003156 | -0.075927431 | 2.973029695 | 0.007052747 | 0.040403707 | -2.610111865 |
| SCNN1B | 1.933706567 | 5.340587275 | 2.97296037 | 0.007053875 | 0.040403707 | -2.610259024 |
| SP8 | 1.013563246 | 3.532072129 | 2.97108028 | 0.007084535 | 0.040541019 | -2.614249461 |
| BMP7 | 1.417365978 | 4.31278326 | 2.970642516 | 0.007091693 | 0.040569211 | -2.615178457 |
| MUC5AC | 3.559281746 | 7.190344508 | 2.969990302 | 0.007102369 | 0.040583772 | -2.616562445 |
| DLX4 | 1.247295556 | 0.769204587 | 2.969260915 | 0.007114327 | 0.040622026 | -2.618110046 |
| INTS8 | 0.62847657 | 4.372641931 | 2.968972347 | 0.007119063 | 0.040623119 | -2.618722284 |
| TG | 0.872534445 | 0.573332236 | 2.968273823 | 0.007130541 | 0.040652284 | -2.6202042 |
| ARHGEF40 | -0.66929852 | 3.655925483 | -2.968257871 | 0.007130803 | 0.040652284 | -2.620238042 |
| VWCE | -0.991013333 | 0.521073148 | -2.967122544 | 0.007149496 | 0.040733314 | -2.62264633 |
| CIB1 | 1.058528413 | 9.124552059 | 2.966914481 | 0.007152927 | 0.040740097 | -2.62308764 |
| RNF182 | -1.617877661 | -1.126205684 | -2.966492798 | 0.007159885 | 0.04076696 | -2.623982006 |
| LEFTY1 | -1.739365375 | -0.769575838 | -2.966234441 | 0.007164151 | 0.040769466 | -2.624529942 |
| HSPA1A | 0.730807629 | 8.331321711 | 2.966020223 | 0.007167691 | 0.040769466 | -2.624984252 |
| KLHDC7B | 2.731704516 | 3.343856991 | 2.965927135 | 0.007169229 | 0.040769466 | -2.625181666 |
| RFESD | 0.642054292 | 0.877486374 | 2.965923313 | 0.007169292 | 0.040769466 | -2.625189773 |
| SLC10A2 | -1.874469118 | #NAME? | -4.894957242 | 0.018342398 | 0.071546089 | -2.627902428 |
| NRG1 | 1.076270426 | 1.914278092 | 2.963253137 | 0.007213559 | 0.04094918 | -2.630851446 |
| L1CAM | -2.1959466 | #NAME? | -2.970982193 | 0.007326212 | 0.041287418 | -2.631948797 |
| FAM216A | 0.865645563 | 3.328266925 | 2.962378161 | 0.007228122 | 0.040999895 | -2.632706243 |
| SMLR1 | -0.977687101 | #NAME? | -3.26956908 | 0.011659413 | 0.054889486 | -2.633227663 |
| FGF12 | -1.352161517 | -0.382597507 | -2.962123072 | 0.007232373 | 0.040999895 | -2.633246944 |
| HNRNPUL1 | 0.653461913 | 6.304443245 | 2.961988727 | 0.007234612 | 0.040999895 | -2.633531705 |
| MARK1 | 0.70500564 | 3.609069646 | 2.961772906 | 0.007238212 | 0.041007514 | -2.633989148 |
| COX5A | 0.663669754 | 6.963955042 | 2.961161011 | 0.007248426 | 0.041052594 | -2.635286021 |
| ITPR3 | 0.774532845 | 5.01848548 | 2.960558518 | 0.007258497 | 0.041082392 | -2.636562862 |
| MYRIP | -1.368173258 | 0.699975199 | -2.960412147 | 0.007260946 | 0.041082392 | -2.636873045 |
| C15orf48 | 3.563979158 | 5.334075427 | 2.960305913 | 0.007262724 | 0.041082392 | -2.637098167 |
| ZNF619 | 0.634515174 | 1.955086833 | 2.960043812 | 0.007267111 | 0.041084073 | -2.637653574 |
| KCND1 | 0.788888971 | 0.88852365 | 2.959238324 | 0.007280612 | 0.041145185 | -2.63936033 |
| DUSP10 | 1.080273745 | 3.833503767 | 2.958871994 | 0.00728676 | 0.041167136 | -2.640136487 |
| ATXN3 | 0.625867434 | 3.062143596 | 2.958498171 | 0.007293038 | 0.041177024 | -2.640928481 |
| CBX1 | 0.59463195 | 5.822146945 | 2.958283282 | 0.00729665 | 0.041178605 | -2.641383734 |
| STIMATE | 0.672574495 | 3.70467648 | 2.958212083 | 0.007297847 | 0.041178605 | -2.641534569 |
| BRSK1 | 0.988561117 | 1.878440371 | 2.956760265 | 0.007322296 | 0.041282791 | -2.644609933 |
| STOM | 0.885000678 | 7.044537496 | 2.956711363 | 0.007323121 | 0.041282791 | -2.64471351 |
| NCOA3 | 0.733551434 | 3.498018157 | 2.956160936 | 0.007332412 | 0.041309556 | -2.645879303 |
| FABP4 | -3.402489702 | #NAME? | -2.973002012 | 0.007560423 | 0.041957231 | -2.646551157 |
| RPP25 | 0.668942712 | 3.415895597 | 2.955764181 | 0.007339116 | 0.041331925 | -2.646719568 |
| FAM167A | 1.550648015 | 1.184764495 | 2.955657015 | 0.007340928 | 0.041331925 | -2.646946521 |
| C12orf76 | 0.701653964 | 4.324084 | 2.954858171 | 0.007354447 | 0.041364495 | -2.648638181 |
| OGDH | 0.614813662 | 5.363210885 | 2.954765165 | 0.007356023 | 0.041364495 | -2.648835123 |
| GALR2 | 1.183137208 | -1.317136261 | 2.954475394 | 0.007360934 | 0.041364495 | -2.6494487 |
| RPS6KC1 | 0.696023425 | 2.840803022 | 2.95377207 | 0.007372866 | 0.041368723 | -2.650937853 |
| PFN1 | 0.678261381 | 9.832478016 | 2.953734247 | 0.007373509 | 0.041368723 | -2.651017932 |
| PTCD2 | 0.741488975 | 2.01064747 | 2.953722304 | 0.007373711 | 0.041368723 | -2.651043216 |
| TUFT1 | 0.803803909 | 4.510990636 | 2.953598615 | 0.007375812 | 0.041368723 | -2.651305088 |
| DUSP18 | 1.232017667 | 3.308193496 | 2.953437741 | 0.007378545 | 0.041368723 | -2.651645679 |
| PRR14L | 0.674054179 | 2.737670677 | 2.95339271 | 0.00737931 | 0.041368723 | -2.651741015 |
| SPRTN | 0.760978967 | 2.769912164 | 2.952350565 | 0.00739704 | 0.041442568 | -2.653947178 |
| TMEM141 | 0.618439816 | 6.523357323 | 2.951915139 | 0.00740446 | 0.041458594 | -2.654868856 |
| MARS1 | 0.62112969 | 5.868497001 | 2.951205541 | 0.007416568 | 0.041513604 | -2.656370763 |
| SPRED1 | 0.6959751 | 3.556009249 | 2.950711698 | 0.007425005 | 0.041548043 | -2.657415925 |
| SKIL | 0.768317287 | 3.940495401 | 2.950299954 | 0.007432047 | 0.041574654 | -2.658287279 |
| HNRNPAB | 0.644846664 | 7.426886345 | 2.949854654 | 0.007439669 | 0.041594725 | -2.659229591 |
| ALOX5 | 1.07644961 | 4.27380929 | 2.949823149 | 0.007440209 | 0.041594725 | -2.659296257 |
| PEX6 | 0.725984535 | 4.88085533 | 2.949360646 | 0.007448135 | 0.041626237 | -2.660274908 |
| SLC15A4 | 0.634389171 | 3.978314546 | 2.949106548 | 0.007452492 | 0.041629416 | -2.660812549 |
| TANK | 0.731365751 | 5.207532124 | 2.949060552 | 0.007453281 | 0.041629416 | -2.660909869 |
| SMIM35 | 2.60928133 | 0.679913917 | 2.948386486 | 0.007464855 | 0.041681256 | -2.662336013 |
| TDP1 | 0.659551382 | 3.455657759 | 2.947605028 | 0.007478294 | 0.041740754 | -2.663989204 |
| ICE2 | 0.680252526 | 4.242164749 | 2.947500029 | 0.007480101 | 0.041740754 | -2.664211318 |
| TNFRSF10D | 0.90648524 | 3.412004717 | 2.947134292 | 0.0074864 | 0.041750282 | -2.664984969 |
| SRPX | -2.458124384 | 2.299662504 | -2.946705893 | 0.007493785 | 0.041753054 | -2.665891121 |
| KNL1 | 1.902435417 | 0.150417901 | 2.946195902 | 0.007502585 | 0.041788028 | -2.666969786 |
| TMF1 | 0.80112998 | 4.323203655 | 2.946075874 | 0.007504657 | 0.041788028 | -2.667223643 |
| GRHL2 | 0.930296648 | 4.838089092 | 2.945571345 | 0.007513376 | 0.041823767 | -2.668290662 |
| KITLG | 1.289970952 | 4.779206282 | 2.944505153 | 0.007531831 | 0.041900849 | -2.670545289 |
| ZNF197 | 0.593126609 | 2.970180406 | 2.943812306 | 0.007543847 | 0.041917591 | -2.672010242 |
| HIF1AN | 0.600027022 | 4.066725905 | 2.943800024 | 0.00754406 | 0.041917591 | -2.672036211 |
| CTSS | 0.984030005 | 6.619980421 | 2.943420547 | 0.007550649 | 0.041924382 | -2.672838514 |
| UBAP2L | 0.696714215 | 5.334893632 | 2.943331398 | 0.007552198 | 0.041924382 | -2.673026989 |
| MAPK13 | 0.755229948 | 4.816489478 | 2.941324993 | 0.007587136 | 0.042054147 | -2.677268244 |
| TACC3 | 1.466951563 | 4.571804352 | 2.940636334 | 0.007599164 | 0.042107979 | -2.678723698 |
| REG1A | 2.150646625 | #NAME? | 4.74513069 | 0.019888009 | 0.075444999 | -2.67908163 |
| ABCA5 | 0.830418197 | 4.591031176 | 2.940381406 | 0.00760362 | 0.042119842 | -2.679262443 |
| VOPP1 | 0.602830774 | 6.30796168 | 2.939970563 | 0.007610809 | 0.042146823 | -2.680130647 |
| SCLT1 | 0.678654841 | 3.387813947 | 2.939155984 | 0.00762508 | 0.042201758 | -2.681851888 |
| GYS2 | 1.880071111 | -2.115409906 | 2.938377786 | 0.007638737 | 0.042262878 | -2.683496073 |
| CD33 | 1.200151182 | 1.981402997 | 2.936870913 | 0.00766525 | 0.042310895 | -2.686679298 |
| FAM131A | 0.7269829 | 3.611908446 | 2.936694761 | 0.007668355 | 0.042310895 | -2.68705137 |
| ADNP | 0.681338442 | 5.107217924 | 2.936463551 | 0.007672433 | 0.042320553 | -2.687539725 |
| RFWD3 | 0.96969844 | 3.550519523 | 2.93611515 | 0.007678581 | 0.042341622 | -2.688275573 |
| HES4 | 0.970622884 | 6.094276341 | 2.935081933 | 0.007696841 | 0.042422196 | -2.690457598 |
| RIPK4 | 1.133027144 | 5.620064757 | 2.934507715 | 0.007707007 | 0.042450201 | -2.691670135 |
| SMIM10L2B | -1.066803292 | -0.363939647 | -2.934063978 | 0.007714872 | 0.042477345 | -2.692607079 |
| TRIM32 | 0.762172546 | 3.397684798 | 2.933813753 | 0.007719311 | 0.042488919 | -2.693135399 |
| FYTTD1 | 0.598485223 | 4.154037854 | 2.932071162 | 0.007750289 | 0.042633621 | -2.696814159 |
| ZNF624 | 0.761632686 | 1.165307744 | 2.931679433 | 0.007757269 | 0.042646219 | -2.697641008 |
| RHBDD1 | 0.705304724 | 3.246069928 | 2.93148013 | 0.007760822 | 0.042652861 | -2.698061674 |
| CEP350 | 0.653125301 | 2.397680437 | 2.931333184 | 0.007763444 | 0.042654376 | -2.698371823 |
| TUBA1B | 0.95114636 | 9.356573203 | 2.931052765 | 0.007768448 | 0.04266898 | -2.698963665 |
| SAMD9 | 1.356347572 | 2.461732785 | 2.930459493 | 0.007779045 | 0.042692352 | -2.700215729 |
| CHST11 | 1.199222316 | 2.516277672 | 2.930420304 | 0.007779746 | 0.042692352 | -2.700298431 |
| POLD1 | 0.711693445 | 3.834411008 | 2.930225988 | 0.00778322 | 0.04269286 | -2.700708498 |
| SLC35A3 | 0.684796861 | 4.941145079 | 2.930152555 | 0.007784533 | 0.04269286 | -2.700863462 |
| PABPC4 | 0.625102636 | 6.686476864 | 2.929746359 | 0.007791802 | 0.042706965 | -2.701720616 |
| TMED5 | 0.719279326 | 4.219328312 | 2.928515539 | 0.007813866 | 0.042814997 | -2.704317588 |
| PCDH7 | 1.302227629 | 2.603866075 | 2.928224241 | 0.007819097 | 0.042821031 | -2.704932146 |
| NUDCD1 | 0.728712215 | 2.962328728 | 2.928191963 | 0.007819677 | 0.042821031 | -2.705000243 |
| TAMALIN | -1.225364798 | 4.094371694 | -2.927763928 | 0.00782737 | 0.042850254 | -2.705903231 |
| AFTPH | 0.593102368 | 4.767990566 | 2.926969683 | 0.007841663 | 0.04288645 | -2.707578633 |
| POLR2A | 0.941851906 | 5.032132683 | 2.926580531 | 0.007848676 | 0.042902318 | -2.708399453 |
| MAP10 | 0.842242006 | 0.824191093 | 2.926320825 | 0.007853359 | 0.042915018 | -2.708947213 |
| XAGE2 | 2.920429831 | #NAME? | 2.942665068 | 0.00809159 | 0.043601083 | -2.709176118 |
| SNPH | -1.486572148 | 1.481536001 | -2.925666751 | 0.007865165 | 0.042966625 | -2.710326668 |
| HTR1D | 0.842059103 | -1.895042406 | 2.924921717 | 0.007878634 | 0.043027208 | -2.711897803 |
| GDAP2 | 0.608350918 | 2.129355667 | 2.923775778 | 0.007899394 | 0.043088897 | -2.714314047 |
| PHF6 | 0.827272159 | 3.452006053 | 2.923340563 | 0.007907292 | 0.043105496 | -2.715231607 |
| NRXN1 | -2.36910825 | -2.7913951 | -2.923327609 | 0.007907528 | 0.043105496 | -2.715258916 |
| RB1 | 0.856103326 | 3.972790744 | 2.923216344 | 0.007909548 | 0.043105496 | -2.715493485 |
| CES2 | 0.675813844 | 5.43662297 | 2.922256568 | 0.007926997 | 0.043174714 | -2.717516737 |
| GAL | -1.333070337 | #NAME? | -2.998580967 | 0.009078726 | 0.046772158 | -2.717671858 |
| NUAK1 | 1.021799911 | 4.125197372 | 2.922086715 | 0.007930089 | 0.043178622 | -2.717874766 |
| RNF183 | 1.298499611 | 3.97630489 | 2.921929712 | 0.007932948 | 0.04318126 | -2.7182057 |
| FXYD1 | -1.722877604 | 3.943042865 | -2.921375157 | 0.007943054 | 0.043197482 | -2.719374548 |
| TYROBP | 1.196377063 | 6.122043996 | 2.920729555 | 0.007954835 | 0.043222774 | -2.720735181 |
| PERCC1 | -1.183546374 | #NAME? | -3.012890274 | 0.009403531 | 0.04796988 | -2.722966428 |
| ZFP3 | 1.035830544 | 2.644186453 | 2.919455091 | 0.00797814 | 0.043308973 | -2.723420797 |
| PTHLH | 1.955701554 | 6.681472582 | 2.919341257 | 0.007980225 | 0.043308973 | -2.723660651 |
| FAM153B | 2.219143096 | -1.263217708 | 2.918953 | 0.007987339 | 0.043331677 | -2.724478696 |
| SDC1 | 1.155791741 | 7.703254247 | 2.918024518 | 0.008004378 | 0.04339304 | -2.726434797 |
| AEBP2 | 1.057023467 | 3.984167949 | 2.91790554 | 0.008006564 | 0.04339304 | -2.726685436 |
| DACT3 | -1.526141398 | 1.690074023 | -2.917587052 | 0.008012418 | 0.04339304 | -2.727356348 |
| EFCAB7 | 0.975172286 | 3.592769739 | 2.917392711 | 0.008015992 | 0.043399473 | -2.727765721 |
| KHDC3L | -1.470275568 | #NAME? | -3.152446063 | 0.0119335 | 0.055561351 | -2.72832342 |
| TDG | 0.755158364 | 4.43232793 | 2.917103436 | 0.008021315 | 0.043404843 | -2.72837505 |
| URB1 | 0.9478971 | 3.439593924 | 2.917079405 | 0.008021757 | 0.043404843 | -2.728425667 |
| CPNE1 | 0.64664785 | 6.577192551 | 2.916422826 | 0.008033852 | 0.043439013 | -2.729808585 |
| RNGTT | 0.769947904 | 2.774777988 | 2.916218107 | 0.008037627 | 0.043439013 | -2.730239748 |
| KRT83 | -1.951460948 | #NAME? | -3.051440208 | 0.010187745 | 0.050291619 | -2.730383376 |
| GSTP1 | 1.026739792 | 10.52017367 | 2.916002903 | 0.008041597 | 0.043446109 | -2.730692979 |
| RNF145 | 0.663264817 | 6.746329305 | 2.915829624 | 0.008044794 | 0.043446109 | -2.731057904 |
| LIPN | 1.386076056 | -1.823849653 | 2.915758533 | 0.008046107 | 0.043446109 | -2.731207619 |
| LRRCC1 | 0.624598091 | 3.256585162 | 2.915297434 | 0.008054623 | 0.043466285 | -2.732178638 |
| PTS | 0.698571509 | 5.719649537 | 2.91464176 | 0.008066749 | 0.0435059 | -2.733559299 |
| RSF1 | 0.670874412 | 2.979617771 | 2.914100458 | 0.008076772 | 0.043540476 | -2.734699027 |
| TOP3A | 0.594564377 | 3.384530928 | 2.914037007 | 0.008077948 | 0.043540476 | -2.73483262 |
| LMAN1 | 0.697102739 | 6.021206613 | 2.913046096 | 0.008096331 | 0.043612638 | -2.736918767 |
| ERI2 | 1.265426031 | 2.910966933 | 2.911795887 | 0.008119581 | 0.043674267 | -2.739550385 |
| CKAP5 | 0.831272978 | 3.961751913 | 2.911645296 | 0.008122386 | 0.043676436 | -2.739867338 |
| PPP1R21 | 0.646858319 | 4.154440939 | 2.911389146 | 0.008127159 | 0.043689184 | -2.740406449 |
| IL6R | 1.30695267 | 3.195014618 | 2.910382675 | 0.008145939 | 0.043764268 | -2.742524546 |
| THSD1 | -0.615879936 | 3.045469729 | -2.910031562 | 0.008152501 | 0.043773656 | -2.743263384 |
| SELENOM | -0.935167971 | 7.425334736 | -2.909192402 | 0.008168203 | 0.043840321 | -2.745029054 |
| TBC1D8B | 0.706308691 | 2.366995047 | 2.909110459 | 0.008169738 | 0.043840321 | -2.74520146 |
| MELK | 2.309298443 | 2.594670061 | 2.908867183 | 0.008174296 | 0.043851843 | -2.745713289 |
| TMEM265 | 0.763814661 | 4.635922109 | 2.908147228 | 0.0081878 | 0.043900597 | -2.7472279 |
| MECOM | 0.821828168 | 5.070317605 | 2.907879223 | 0.008192833 | 0.043900597 | -2.747791678 |
| ITGB3BP | 0.619017405 | 4.802302936 | 2.905838559 | 0.008231249 | 0.044061515 | -2.75208372 |
| CYP4F3 | 1.42157634 | 2.546917386 | 2.905513464 | 0.008237384 | 0.044073278 | -2.752767362 |
| ZNF564 | 0.637085944 | 3.756530121 | 2.905247894 | 0.0082424 | 0.044076152 | -2.753325806 |
| ACP3 | 1.001299346 | 1.520163479 | 2.90522838 | 0.008242769 | 0.044076152 | -2.753366839 |
| WDFY1 | 0.850680257 | 4.947473243 | 2.904721315 | 0.008252354 | 0.04410284 | -2.754433038 |
| ABCF2-H2BE1 | 1.167356421 | 3.676662775 | 2.904549395 | 0.008255606 | 0.04410284 | -2.754794514 |
| CAPN15 | 0.653154294 | 4.339636005 | 2.90452897 | 0.008255992 | 0.04410284 | -2.754837458 |
| CNGA4 | 2.555721495 | 2.541337299 | 2.904345726 | 0.00825946 | 0.04410284 | -2.755222732 |
| CARNMT1 | 0.796748696 | 3.388066399 | 2.904323287 | 0.008259885 | 0.04410284 | -2.75526991 |
| MFSD4A | 0.822341343 | 4.980927843 | 2.903529569 | 0.008274923 | 0.044170166 | -2.756938597 |
| CYP46A1 | -1.171012644 | 0.598813428 | -2.902887469 | 0.008287108 | 0.04420457 | -2.758288386 |
| KCNG3 | 1.283422647 | -2.258871477 | 2.902851171 | 0.008287797 | 0.04420457 | -2.758364685 |
| AP4E1 | 0.71210829 | 2.209035482 | 2.902168237 | 0.008300777 | 0.044243898 | -2.759800168 |
| PITPNB | 0.601330953 | 5.612463348 | 2.90166175 | 0.008310415 | 0.044281633 | -2.760864679 |
| CRYL1 | -0.644472812 | 5.915976059 | -2.900488234 | 0.008332789 | 0.044366433 | -2.763330821 |
| KDM4A | 0.667286532 | 4.951218158 | 2.899204503 | 0.008357329 | 0.04445828 | -2.766028095 |
| FPR3 | 1.679997217 | 2.501919811 | 2.899157209 | 0.008358235 | 0.04445828 | -2.766127456 |
| NUDT10 | 1.205219517 | 2.620915211 | 2.898126443 | 0.008377992 | 0.044550338 | -2.768292843 |
| LCORL | 0.842971694 | 2.452130492 | 2.897711269 | 0.008385962 | 0.044566658 | -2.769164928 |
| CBFB | 0.608989516 | 5.101986823 | 2.897468211 | 0.008390631 | 0.044578446 | -2.769675456 |
| DNAJC12 | 2.247894198 | 3.161350199 | 2.896291784 | 0.008413267 | 0.044685653 | -2.772146204 |
| RIMKLA | 1.015830704 | 0.272639458 | 2.89597822 | 0.00841931 | 0.044691646 | -2.772804686 |
| TRUB1 | 1.007635664 | 3.452843869 | 2.895507957 | 0.008428381 | 0.044713694 | -2.773792175 |
| REST | 0.740031293 | 3.375005706 | 2.894913793 | 0.008439856 | 0.044748459 | -2.775039742 |
| HP1BP3 | 0.692796524 | 6.499316848 | 2.894620637 | 0.008445522 | 0.044765453 | -2.775655243 |
| GTF2E1 | 0.615838169 | 3.210349104 | 2.89347525 | 0.008467698 | 0.044852341 | -2.778059806 |
| PIBF1 | 0.761564802 | 4.071815662 | 2.893274463 | 0.008471591 | 0.044852341 | -2.778481286 |
| LYPLA1 | 0.660553886 | 5.614381435 | 2.89224632 | 0.008491553 | 0.044943941 | -2.780639307 |
| NUB1 | 0.58746153 | 5.708996867 | 2.891905291 | 0.008498184 | 0.044965951 | -2.781355038 |
| CABS1 | -2.573434943 | #NAME? | -3.227406154 | 0.014936882 | 0.063438143 | -2.781907415 |
| RTN4RL1 | -0.956720603 | 1.203464286 | -2.890749913 | 0.008520687 | 0.045005119 | -2.783779609 |
| RAB32 | 0.684246185 | 4.769574623 | 2.890656754 | 0.008522503 | 0.045005119 | -2.783975087 |
| IGFBPL1 | 1.794578883 | 0.244174061 | 2.890648013 | 0.008522674 | 0.045005119 | -2.783993427 |
| RAMP2 | -1.302837869 | 4.893995183 | -2.890635944 | 0.008522909 | 0.045005119 | -2.784018751 |
| C17orf58 | 0.74794333 | 4.487976923 | 2.890490258 | 0.008525751 | 0.045007059 | -2.784324441 |
| TMEM17 | 0.648671054 | 3.938698667 | 2.889868336 | 0.008537895 | 0.045012146 | -2.785629331 |
| MAP7D1 | 0.600368469 | 5.180596252 | 2.889807125 | 0.008539091 | 0.045012146 | -2.785757753 |
| CEP85 | 1.0579353 | 3.617256548 | 2.889670348 | 0.008541764 | 0.04501319 | -2.786044715 |
| CDKN2D | 0.819440748 | 4.557910399 | 2.889303871 | 0.00854893 | 0.045024862 | -2.786813563 |
| BRMS1L | 0.673318176 | 2.868601118 | 2.888586616 | 0.008562973 | 0.045057843 | -2.788318202 |
| OXTR | 2.416128297 | 3.235096486 | 2.888477908 | 0.008565103 | 0.045057843 | -2.788546234 |
| UNC119B | 0.864011153 | 5.319780464 | 2.887715125 | 0.008580065 | 0.045123497 | -2.790146181 |
| DNAAF3 | 3.002558669 | 4.879261405 | 2.887307832 | 0.008588064 | 0.045152508 | -2.791000409 |
| SBNO1 | 0.649256876 | 3.219055423 | 2.886995242 | 0.008594208 | 0.045171751 | -2.791655979 |
| CACFD1 | 0.708345739 | 4.40073609 | 2.886399058 | 0.008605937 | 0.045220333 | -2.792906226 |
| TRIB2 | 1.056651057 | 5.289898203 | 2.88615588 | 0.008610726 | 0.045232427 | -2.793416158 |
| MFSD14A | 0.73670798 | 5.203139398 | 2.885630604 | 0.008621079 | 0.04525318 | -2.794517574 |
| C6orf141 | -1.246108443 | 1.176677247 | -2.885426091 | 0.008625113 | 0.04525318 | -2.794946379 |
| TYMP | 1.524539842 | 8.102654825 | 2.885324443 | 0.008627118 | 0.04525318 | -2.795159502 |
| PARD6B | 0.767268829 | 3.097469685 | 2.88497545 | 0.008634008 | 0.045268763 | -2.795891203 |
| ZC3HAV1 | 0.659813613 | 3.959038269 | 2.884903191 | 0.008635435 | 0.045268763 | -2.796042696 |
| NTF4 | 1.388639007 | 3.803283678 | 2.884795776 | 0.008637557 | 0.045268763 | -2.796267892 |
| DGKH | 0.911745048 | 2.537734316 | 2.883609655 | 0.008661021 | 0.045339471 | -2.798754369 |
| ITGB1 | 0.87502517 | 7.4167672 | 2.883457627 | 0.008664033 | 0.045342186 | -2.799073034 |
| EPHX3 | 1.607897922 | 2.317487841 | 2.883107196 | 0.008670979 | 0.045365483 | -2.799807546 |
| CCPG1 | 0.677036143 | 6.122486685 | 2.882683851 | 0.008679377 | 0.045378756 | -2.800694837 |
| PREP | 0.626328859 | 3.656066043 | 2.882202867 | 0.008688929 | 0.045407143 | -2.801702865 |
| ZNF132 | 0.921476094 | 2.392544091 | 2.881757311 | 0.008697786 | 0.045440371 | -2.80263658 |
| SLC12A2 | -0.919394286 | 5.672613037 | -2.881275055 | 0.008707382 | 0.045477209 | -2.803647137 |
| IMPDH2 | 0.695506978 | 7.922652614 | 2.881109556 | 0.008710677 | 0.045477209 | -2.803993919 |
| RCC2 | 0.623108953 | 6.132636042 | 2.881026131 | 0.008712339 | 0.045477209 | -2.804168722 |
| RELB | 0.991601834 | 4.047262353 | 2.880849359 | 0.008715861 | 0.045482538 | -2.804539112 |
| MAP3K9 | 0.809546485 | 1.53268649 | 2.880150874 | 0.008729791 | 0.045540135 | -2.80600255 |
| HSPB11 | 0.983950692 | 7.191977162 | 2.880044865 | 0.008731906 | 0.045540135 | -2.806224642 |
| ACADM | 0.627374428 | 5.559440016 | 2.877880134 | 0.008775222 | 0.045752921 | -2.810759065 |
| CD209 | 1.455467804 | 1.982573499 | 2.877243913 | 0.008787992 | 0.045795466 | -2.812091467 |
| BTK | 1.405419855 | 2.72344263 | 2.877112819 | 0.008790625 | 0.045795466 | -2.812365995 |
| OXSR1 | 0.691881505 | 4.300805526 | 2.877056478 | 0.008791757 | 0.045795466 | -2.812483977 |
| LARP4 | 0.679778232 | 4.299265477 | 2.876971991 | 0.008793455 | 0.045795466 | -2.8126609 |
| FGF10 | -2.379676709 | 0.197762085 | -2.876800198 | 0.008796908 | 0.045800334 | -2.81302064 |
| IHH | 2.72211865 | -1.806458332 | 2.876641617 | 0.008800097 | 0.045803823 | -2.813352705 |
| BRD3 | 0.817680218 | 3.549143916 | 2.876294053 | 0.008807089 | 0.045827103 | -2.814080472 |
| FBXO5 | 1.156244843 | 2.830163172 | 2.875428484 | 0.008824527 | 0.045892087 | -2.815892725 |
| SRPX2 | 1.676274498 | 2.775885996 | 2.875298482 | 0.008827148 | 0.045892087 | -2.816164893 |
| TCEAL9 | 0.601492652 | 6.351843625 | 2.874532951 | 0.008842602 | 0.045959293 | -2.81776747 |
| RPP40 | 0.926167978 | 2.971347967 | 2.874081828 | 0.008851721 | 0.045993544 | -2.818711774 |
| MINK1 | 0.629970205 | 5.783107284 | 2.873730378 | 0.008858832 | 0.046017342 | -2.819447397 |
| MTCL1 | 1.019906219 | 0.774143496 | 2.873590708 | 0.008861659 | 0.046018884 | -2.81973973 |
| HECTD1 | 0.733896428 | 5.27035108 | 2.873339538 | 0.008866745 | 0.046032153 | -2.82026542 |
| ZMYM4 | 0.625555827 | 4.174881443 | 2.873005929 | 0.008873506 | 0.046054103 | -2.820963621 |
| SCO2 | 1.137771002 | 6.150081791 | 2.871998406 | 0.008893952 | 0.046147051 | -2.823072029 |
| CCNG2 | 0.785813888 | 5.232897884 | 2.871465452 | 0.008904786 | 0.046190085 | -2.824187194 |
| BATF | 1.251026776 | 4.225832401 | 2.87076711 | 0.008919001 | 0.046250627 | -2.825648286 |
| GIPC1 | 0.747995472 | 6.961950812 | 2.870049996 | 0.00893362 | 0.046300034 | -2.827148496 |
| HPR | -2.033268549 | #NAME? | -3.02044186 | 0.01181268 | 0.055225037 | -2.828047287 |
| CDS1 | 1.185404533 | 4.992842527 | 2.869447733 | 0.008945916 | 0.046350549 | -2.82840831 |
| ZNF217 | 0.905175801 | 4.271804984 | 2.868648707 | 0.008962254 | 0.046421973 | -2.83007954 |
| SEC14L1 | 0.915891944 | 5.616033351 | 2.868098748 | 0.008973515 | 0.046453843 | -2.831229707 |
| ATP1A1 | 0.799507544 | 9.26631279 | 2.867910367 | 0.008977376 | 0.046460603 | -2.831623658 |
| ASIC1 | 0.86949278 | 3.238718049 | 2.867589837 | 0.008983948 | 0.04647265 | -2.832293943 |
| RAD54B | 0.657467769 | 2.076818497 | 2.867482245 | 0.008986156 | 0.04647265 | -2.83251893 |
| RANBP3L | -1.19322689 | -1.232789286 | -2.866975728 | 0.008996554 | 0.046474826 | -2.833578061 |
| CPOX | 0.653131717 | 4.545261578 | 2.866589938 | 0.009004481 | 0.046481831 | -2.834384699 |
| PCDHGB3 | 1.464898179 | #NAME? | 2.890152111 | 0.009431526 | 0.048031134 | -2.83484522 |
| RAMP3 | -1.253146123 | 4.921420432 | -2.866140666 | 0.009013721 | 0.046503129 | -2.83532401 |
| EXO1 | 2.1699562 | #NAME? | 2.87329746 | 0.009140216 | 0.046955922 | -2.835358345 |
| KCTD21 | 0.586502344 | 2.674437412 | 2.864054334 | 0.009056749 | 0.046698623 | -2.83968515 |
| EFCC1 | -1.175859063 | 0.759088802 | -2.863684994 | 0.009064387 | 0.046724756 | -2.840457053 |
| KCTD4 | -0.959417212 | #NAME? | -2.987909862 | 0.011457018 | 0.054297467 | -2.841075421 |
| PLIN2 | -0.88289781 | 4.898627472 | -2.863214936 | 0.009074116 | 0.046761654 | -2.84143939 |
| DCAF12L2 | -2.362121735 | #NAME? | -2.94820835 | 0.010683296 | 0.051752593 | -2.842334182 |
| TWNK | 0.626028282 | 2.97679079 | 2.861960996 | 0.009100119 | 0.046831946 | -2.844059558 |
| PANK3 | 0.76697281 | 3.332769641 | 2.861886112 | 0.009101674 | 0.046831946 | -2.844216015 |
| ATP1B2 | -0.894418759 | 1.341374198 | -2.861621437 | 0.009107172 | 0.046839095 | -2.844768996 |
| MPHOSPH9 | 0.832434115 | 2.886509232 | 2.861081361 | 0.009118402 | 0.04687034 | -2.8458973 |
| CLIP1 | 0.781555805 | 4.776278801 | 2.860231771 | 0.009136094 | 0.04694801 | -2.84767204 |
| KCNH1 | 1.675141209 | -0.545623378 | 2.859736441 | 0.009146424 | 0.046974547 | -2.848706648 |
| RRAS2 | 0.624150527 | 5.335342103 | 2.859110335 | 0.009159497 | 0.04702387 | -2.850014299 |
| RSPRY1 | 0.593749015 | 4.729224669 | 2.85817325 | 0.009179097 | 0.047089157 | -2.851971214 |
| PPP2R2C | 1.767274702 | #NAME? | 2.863384582 | 0.009346669 | 0.047760189 | -2.855847086 |
| AKR1A1 | 0.603631214 | 8.173742925 | 2.855499246 | 0.009235246 | 0.047344093 | -2.857553804 |
| PROCA1 | 0.836209031 | 2.809497853 | 2.855067933 | 0.009244333 | 0.047370371 | -2.858454054 |
| RAB38 | 1.179618745 | 4.642902989 | 2.852341302 | 0.009301979 | 0.047644636 | -2.864143803 |
| MYO9B | 0.603943892 | 4.418491424 | 2.851724579 | 0.009315065 | 0.047672714 | -2.865430408 |
| NECAB1 | -1.276229106 | 0.202804987 | -2.85165968 | 0.009316443 | 0.047672714 | -2.865565795 |
| MGAT5 | 0.7652326 | 4.437539913 | 2.851243812 | 0.009325278 | 0.047691087 | -2.8664333 |
| DDX58 | 0.941497248 | 3.705456125 | 2.851025235 | 0.009329925 | 0.047701438 | -2.866889234 |
| ZNF468 | 0.808091031 | 3.37929133 | 2.850453841 | 0.009342083 | 0.047750175 | -2.868081039 |
| LRRTM1 | -2.786760928 | #NAME? | -2.857341536 | 0.009474706 | 0.04811123 | -2.868323022 |
| SLC35F1 | -1.384914717 | -1.22725309 | -2.849804361 | 0.009355921 | 0.04779404 | -2.86943559 |
| ZNF143 | 0.637759981 | 3.332145528 | 2.848991471 | 0.009373269 | 0.047842342 | -2.871130758 |
| WNK1 | 0.715861093 | 4.400190431 | 2.848444736 | 0.009384953 | 0.047888541 | -2.872270777 |
| CAPG | 0.785661503 | 7.121831295 | 2.847441401 | 0.009406433 | 0.047971224 | -2.874362624 |
| SERPINH1 | 1.061721206 | 6.729350157 | 2.846696814 | 0.009422403 | 0.048012278 | -2.8759148 |
| RIT1 | 0.630617262 | 4.180092494 | 2.84631872 | 0.009430522 | 0.048031134 | -2.876702913 |
| DLG5 | 0.998037574 | 5.400465619 | 2.845678403 | 0.009444288 | 0.048056471 | -2.878037507 |
| GALNT18 | 1.171449174 | 4.609381455 | 2.845135118 | 0.009455983 | 0.048079177 | -2.879169757 |
| MARS2 | 0.885252922 | 2.389110932 | 2.845102676 | 0.009456682 | 0.048079177 | -2.879237366 |
| UGT8 | -0.73506548 | 2.353672649 | -2.844667799 | 0.009466054 | 0.04811123 | -2.880143612 |
| MYCBP | 0.907190769 | 5.592347722 | 2.844436918 | 0.009471033 | 0.04811123 | -2.880624724 |
| SLC26A6 | 0.658632836 | 4.145265082 | 2.843990405 | 0.00948067 | 0.04811123 | -2.881555121 |
| FOXO3B | 1.179426048 | -1.404668268 | 2.843966607 | 0.009481183 | 0.04811123 | -2.881604707 |
| WDR47 | 0.874626422 | 3.349797585 | 2.84395172 | 0.009481505 | 0.04811123 | -2.881635726 |
| SUPT20H | 0.628342577 | 4.762236467 | 2.843095135 | 0.009500019 | 0.04819173 | -2.883420402 |
| RFPL1 | 1.657978466 | #NAME? | 2.8497253 | 0.009638464 | 0.048690275 | -2.884031261 |
| SAMSN1 | 1.505455245 | 4.032210775 | 2.842226485 | 0.00951883 | 0.048273686 | -2.885229975 |
| RACGAP1 | 1.618738109 | 3.527808606 | 2.841788408 | 0.00952833 | 0.048296522 | -2.886142484 |
| HELB | 1.406643109 | -1.231620243 | 2.841773921 | 0.009528644 | 0.048296522 | -2.88617266 |
| PAIP2B | -0.80918873 | 2.498352366 | -2.841232944 | 0.009540388 | 0.048342575 | -2.887299422 |
| ZNF772 | 0.699690375 | 1.682864765 | 2.840900366 | 0.009547615 | 0.048365719 | -2.887992079 |
| SNTG1 | 1.635630199 | #NAME? | 3.048645266 | 0.016209264 | 0.066455745 | -2.890571194 |
| ADGRE2 | 1.467955329 | 1.172478569 | 2.839561191 | 0.009576768 | 0.048472893 | -2.890780801 |
| WNT3A | 1.474626562 | 1.91046838 | 2.839373188 | 0.009580868 | 0.048480149 | -2.891172256 |
| CEP89 | 0.659630638 | 3.477625828 | 2.83787387 | 0.009613621 | 0.048618828 | -2.894293687 |
| C21orf58 | 1.900844545 | 4.910429106 | 2.837301439 | 0.009626154 | 0.048668677 | -2.895485241 |
| SWSAP1 | 0.696575001 | 3.432437684 | 2.837129898 | 0.009629913 | 0.048674149 | -2.895842293 |
| MFN2 | 0.712424434 | 5.790330934 | 2.836932447 | 0.009634241 | 0.048682496 | -2.896253267 |
| TPM4 | 0.778194587 | 8.309853429 | 2.835934684 | 0.009656141 | 0.048725467 | -2.898329805 |
| PARP8 | 0.818873657 | 4.325125006 | 2.835422259 | 0.009667407 | 0.048768782 | -2.899396134 |
| MSH2 | 0.861857567 | 4.031938883 | 2.835002627 | 0.009676642 | 0.048801833 | -2.900269304 |
| ADGRE3 | 2.436303483 | #NAME? | 2.841737948 | 0.009813106 | 0.049166498 | -2.900486139 |
| LIPA | 0.844371313 | 6.382962198 | 2.834745182 | 0.009682312 | 0.048815398 | -2.900804968 |
| CSTF2 | 0.715240431 | 4.096941159 | 2.834531907 | 0.009687011 | 0.048815398 | -2.901248711 |
| POLR2B | 0.664633439 | 5.567471988 | 2.834514979 | 0.009687384 | 0.048815398 | -2.901283931 |
| APOBEC3C | 0.6441092 | 5.181524093 | 2.834068939 | 0.00969722 | 0.048851426 | -2.902211919 |
| C3orf52 | 0.89772519 | 3.060986713 | 2.833018111 | 0.00972043 | 0.048927689 | -2.904397913 |
| LMNB2 | 1.138200019 | 4.645456762 | 2.832164306 | 0.009739327 | 0.049002113 | -2.906173785 |
| IQGAP1 | 0.645759843 | 5.635725438 | 2.832037214 | 0.009742143 | 0.049002113 | -2.906438112 |
| UNC93B1 | 0.763183525 | 6.752097614 | 2.831863477 | 0.009745994 | 0.049002113 | -2.906799439 |
| PMEL | 0.6209969 | 1.062913564 | 2.831589341 | 0.009752073 | 0.049016247 | -2.907369551 |
| DYNLT3 | 0.673174645 | 4.899323665 | 2.83026066 | 0.009781586 | 0.04909397 | -2.910132425 |
| GOT2 | 0.682876848 | 6.15741752 | 2.830189924 | 0.00978316 | 0.04909397 | -2.910279499 |
| RNF128 | -2.730407405 | 0.838389178 | -2.829309773 | 0.009802761 | 0.049155448 | -2.912109358 |
| ZNF320 | 0.619955218 | 4.257967032 | 2.829275719 | 0.00980352 | 0.049155448 | -2.912180151 |
| RBM12B | 0.849536009 | 2.372494399 | 2.827860638 | 0.009835114 | 0.049214756 | -2.915121601 |
| DEPDC1 | 2.314728344 | 0.735237678 | 2.827423793 | 0.009844886 | 0.049240678 | -2.916029515 |
| AHSA1 | 0.814739318 | 7.372100118 | 2.826992544 | 0.009854543 | 0.049275425 | -2.916925739 |
| TECRL | 1.632747353 | -2.379675395 | 2.825189409 | 0.009895017 | 0.049396318 | -2.920672361 |
| TTBK1 | 2.169780745 | #NAME? | 2.831843765 | 0.010033634 | 0.049801221 | -2.920842451 |
| UBE2E1 | 0.784009372 | 4.887820632 | 2.824766623 | 0.00990453 | 0.049416678 | -2.92155069 |
| KIAA1586 | 0.876607757 | 1.851434355 | 2.823747711 | 0.009927492 | 0.049504079 | -2.923667214 |
| IER5 | 0.679659207 | 4.738755661 | 2.82326664 | 0.009938351 | 0.049544643 | -2.924666397 |
| THOP1 | 0.600635762 | 4.200508484 | 2.822569533 | 0.009954107 | 0.049598186 | -2.926114151 |
| PRRC2C | 0.72426972 | 4.262841039 | 2.822113288 | 0.009964431 | 0.049620249 | -2.927061595 |
| MTM1 | 0.779298794 | 3.512838826 | 2.821030227 | 0.009988981 | 0.049728885 | -2.929310423 |
| TUBB4B | 1.34901588 | 9.913971811 | 2.820060922 | 0.010011002 | 0.049797614 | -2.931322726 |
| SLC22A11 | -1.147981959 | #NAME? | -2.885221785 | 0.011420031 | 0.054169194 | -2.931411466 |
| CTDSP2 | 0.610412619 | 6.196411904 | 2.819829531 | 0.010016265 | 0.049801221 | -2.931803054 |
| CDCA7L | 0.849687898 | 4.78238671 | 2.819530569 | 0.010023069 | 0.049801221 | -2.932423622 |
| DMTF1 | 0.704913404 | 5.239475036 | 2.819527525 | 0.010023139 | 0.049801221 | -2.93242994 |
| PPP4R3B | 0.645652441 | 5.597215721 | 2.819329078 | 0.010027658 | 0.049801221 | -2.93284185 |
| FAS | 0.878285514 | 4.692049211 | 2.819149615 | 0.010031746 | 0.049801221 | -2.933214342 |
| MSI2 | 0.736324039 | 5.418443115 | 2.819121876 | 0.010032378 | 0.049801221 | -2.933271918 |
| TRPC5OS | -1.235546835 | #NAME? | -2.898454803 | 0.011783148 | 0.055157869 | -2.933819541 |
| WFDC10B | 2.294891261 | 0.610356581 | 2.817463715 | 0.010070232 | 0.049914754 | -2.93671308 |
| RUVBL1 | 1.225486598 | 6.320067141 | 2.816735144 | 0.010086907 | 0.049980301 | -2.93822479 |
| RHOT1 | 0.681957328 | 4.513209769 | 2.816645855 | 0.010088952 | 0.049980301 | -2.938410042 |
| SLC25A19 | 0.684026916 | 3.69188535 | 2.816368748 | 0.010095303 | 0.049984528 | -2.938984957 |
| MGME1 | 0.711850876 | 4.610933367 | 2.816032236 | 0.010103019 | 0.050009121 | -2.939683085 |
| MCIDAS | 1.969755725 | 2.108645802 | 2.815681487 | 0.010111069 | 0.050035346 | -2.94041071 |
| GPR34 | 1.322252141 | 2.199029188 | 2.814921052 | 0.010128541 | 0.05009624 | -2.941988084 |
| NEK6 | 0.684987535 | 4.805665981 | 2.814889221 | 0.010129273 | 0.05009624 | -2.942054108 |
| ZNF845 | 0.621465468 | 2.148846051 | 2.814786381 | 0.010131638 | 0.05009624 | -2.942267413 |
| LY75-CD302 | 1.21461873 | #NAME? | 3.500119272 | 0.026467822 | 0.090474149 | -2.942630076 |
| ELF5 | -1.47380319 | 5.576461441 | -2.814359684 | 0.010141458 | 0.050126064 | -2.94315241 |
| CP | 2.250285659 | 7.775049543 | 2.814284772 | 0.010143182 | 0.050126064 | -2.943307778 |
| MS4A2 | 1.990083037 | 2.535326422 | 2.814039294 | 0.010148837 | 0.050140381 | -2.943816883 |
| MAPK6 | 0.820328893 | 4.342358355 | 2.812555721 | 0.010183072 | 0.0502822 | -2.946893287 |
| DNAI1 | 3.816552639 | 5.193418261 | 2.812111597 | 0.010193342 | 0.050301503 | -2.947814102 |
| DOK2 | 1.3063187 | 3.772998625 | 2.812027878 | 0.010195279 | 0.050301503 | -2.947987672 |
| WAPL | 0.670436513 | 3.768751222 | 2.811116687 | 0.010216384 | 0.050370072 | -2.949876641 |
| PRIM2 | 0.776889075 | 3.159281298 | 2.811069177 | 0.010217486 | 0.050370072 | -2.949975124 |
| SLC7A11 | 1.090355784 | 0.166857381 | 2.810567345 | 0.010229128 | 0.050407009 | -2.951015337 |
| ANO1 | -1.958407355 | 4.572976319 | -2.81037507 | 0.010233592 | 0.050407009 | -2.951413868 |
| TIMELESS | 0.997824002 | 3.226999505 | 2.810268583 | 0.010236065 | 0.050407009 | -2.951634579 |
| NMNAT3 | -0.674345387 | 3.17524701 | -2.809886842 | 0.010244936 | 0.050424893 | -2.952425771 |
| PRB2 | -4.984441012 | 2.235548526 | -2.809763357 | 0.010247807 | 0.050424893 | -2.952681692 |
| ARAP2 | 0.974263354 | 2.933282664 | 2.809744792 | 0.010248239 | 0.050424893 | -2.952720168 |
| DUOX1 | 1.521064786 | 6.617356246 | 2.808787816 | 0.010270515 | 0.050508271 | -2.954703323 |
| SIGLEC1 | 1.7566811 | 1.654141957 | 2.808595277 | 0.010275003 | 0.050516679 | -2.955102289 |
| MICAL2 | 1.342762698 | 2.946170436 | 2.808327084 | 0.010281256 | 0.050533765 | -2.955657999 |
| USP12 | 0.644198773 | 3.984617873 | 2.807878809 | 0.010291717 | 0.050568803 | -2.956586792 |
| KIF24 | 1.732611561 | 2.112614545 | 2.807783353 | 0.010293946 | 0.050568803 | -2.956784563 |
| TMEM30B | 0.730621598 | 5.349599896 | 2.807558123 | 0.010299207 | 0.050578881 | -2.957251192 |
| MMP27 | 2.108217256 | -1.007773303 | 2.807457431 | 0.01030156 | 0.050578881 | -2.957459799 |
| CA4 | -2.84833838 | #NAME? | -2.837684992 | 0.010979967 | 0.052746846 | -2.958019317 |
| DLGAP5 | 2.579230582 | 1.900547268 | 2.807135966 | 0.010309075 | 0.050602116 | -2.958125765 |
| FAM171B | -1.378201003 | 1.517192215 | -2.806966035 | 0.01031305 | 0.050607966 | -2.958477792 |
| DIPK2A | 0.733203913 | 5.136361387 | 2.806760098 | 0.010317868 | 0.050617954 | -2.958904394 |
| CLDN24 | -2.949794014 | #NAME? | -3.265018342 | 0.023323092 | 0.083626529 | -2.95896592 |
| BUB1B-PAK6 | 1.001983308 | 3.181293412 | 2.806558322 | 0.010322592 | 0.050627469 | -2.959322363 |
| ZNF681 | 0.855168399 | 1.136153528 | 2.805226537 | 0.010353819 | 0.050766935 | -2.962080755 |
| WDR49 | 2.702024148 | 3.319910287 | 2.804365405 | 0.010374059 | 0.050840169 | -2.963864016 |
| TGFB1 | 0.746977305 | 5.907620297 | 2.803553545 | 0.010393175 | 0.050918718 | -2.965545018 |
| ABCC3 | 1.135247512 | 2.858274929 | 2.803348577 | 0.010398006 | 0.050928668 | -2.965969382 |
| ITGB4 | 0.740309354 | 6.686100038 | 2.802852662 | 0.010409705 | 0.050946936 | -2.966996061 |
| VIPR1 | -1.333680177 | 4.071666085 | -2.80281388 | 0.01041062 | 0.050946936 | -2.967076348 |
| CITED4 | -0.83123539 | 5.419994279 | -2.802715531 | 0.010412942 | 0.050946936 | -2.967279946 |
| PROSER3 | 0.654643381 | 3.239616694 | 2.8023774 | 0.010420928 | 0.050958589 | -2.967979905 |
| ARHGEF11 | 0.633358267 | 3.820462347 | 2.800598788 | 0.010463031 | 0.051116702 | -2.971661162 |
| CTNNBIP1 | -0.649189256 | 5.312201067 | -2.80053485 | 0.010464547 | 0.051116702 | -2.971793478 |
| ACTN2 | -2.339059091 | -3.407960177 | -2.799532074 | 0.010488359 | 0.051178823 | -2.973868472 |
| TTBK2 | 0.810894523 | 2.099039278 | 2.799527043 | 0.010488479 | 0.051178823 | -2.973878883 |
| ZNF646 | 0.620614276 | 2.755163157 | 2.798752753 | 0.010506901 | 0.05125496 | -2.975480852 |
| CLHC1 | 0.795353589 | 2.75434641 | 2.798013188 | 0.010524525 | 0.051327168 | -2.97701079 |
| FGFR3 | 1.690436638 | 6.498136785 | 2.796807505 | 0.010553317 | 0.051421769 | -2.979504596 |
| SOAT1 | 0.683429485 | 4.089071972 | 2.796791908 | 0.01055369 | 0.051421769 | -2.979536853 |
| VSTM5 | -1.128006587 | -0.968560385 | -2.796633876 | 0.01055747 | 0.051421769 | -2.979863686 |
| GAS2L3 | 1.006111547 | 1.274574313 | 2.796609193 | 0.01055806 | 0.051421769 | -2.979914734 |
| SCHIP1 | 0.884183136 | 3.248971001 | 2.7961239 | 0.010569675 | 0.051464556 | -2.980918333 |
| RNF217 | 0.677316217 | 2.40436308 | 2.795480538 | 0.010585093 | 0.051514475 | -2.982248702 |
| TMC3 | -0.872245526 | -0.947784815 | -2.795368346 | 0.010587783 | 0.051514475 | -2.982480682 |
| KSR1 | 1.278418289 | 4.16868677 | 2.794185407 | 0.010616193 | 0.051631379 | -2.984926404 |
| ALDH4A1 | 1.212482359 | 4.470481565 | 2.793971355 | 0.010621342 | 0.051631379 | -2.985368905 |
| NUP98 | 0.635203399 | 4.655336818 | 2.792712204 | 0.010651676 | 0.051708677 | -2.987971589 |
| NIN | 0.759794435 | 3.482822445 | 2.792514738 | 0.01065644 | 0.051708677 | -2.988379706 |
| TMEM94 | 0.764054738 | 5.201832828 | 2.792089147 | 0.010666716 | 0.051708677 | -2.989259261 |
| MED24 | 0.62449458 | 5.654454065 | 2.791912152 | 0.010670992 | 0.051708677 | -2.989625032 |
| NIPBL | 0.603809741 | 3.930766608 | 2.789264628 | 0.010735152 | 0.051950367 | -2.995095058 |
| TRIM68 | 0.630429075 | 4.493753629 | 2.789140371 | 0.010738173 | 0.051951159 | -2.995351727 |
| LMBR1 | 0.590938096 | 3.372653068 | 2.788781414 | 0.010746902 | 0.051979564 | -2.996093167 |
| PTPRF | 0.649085174 | 6.509369493 | 2.788343176 | 0.010757569 | 0.051993853 | -2.99699831 |
| PTTG1 | 1.765332927 | 5.425722961 | 2.788336205 | 0.010757738 | 0.051993853 | -2.997012707 |
| CDCA2 | 2.63918862 | 0.405836626 | 2.788072933 | 0.010764151 | 0.051993853 | -2.997556441 |
| IRF9 | 0.808314002 | 6.850189482 | 2.787890353 | 0.010768601 | 0.052001533 | -2.997933506 |
| MYOM1 | -1.238962182 | 0.236479159 | -2.787140038 | 0.010786904 | 0.052076093 | -2.999482951 |
| LAMC3 | -1.324706214 | -2.736631096 | -2.786899253 | 0.010792785 | 0.052089947 | -2.999980145 |
| SFN | 1.941159395 | 7.563220586 | 2.786216317 | 0.010809479 | 0.05214355 | -3.001390226 |
| FHAD1 | 2.433144315 | 4.333975442 | 2.785709909 | 0.010821874 | 0.052169181 | -3.002435724 |
| CTRL | -0.905962196 | 2.117898231 | -2.785078384 | 0.01083735 | 0.052222588 | -3.003739407 |
| LOC100286986 | -1.178071905 | #NAME? | -3.221083953 | 0.024464492 | 0.086023057 | -3.003854069 |
| CFAP300 | 2.344656821 | 5.725878145 | 2.784340165 | 0.010855468 | 0.052290223 | -3.005263174 |
| MS4A8 | 3.115381768 | 6.105960925 | 2.78427223 | 0.010857136 | 0.052290223 | -3.00540339 |
| SP1 | 0.716014922 | 4.552471623 | 2.783147144 | 0.010884808 | 0.052409615 | -3.007725314 |
| CLIP4 | 0.751732697 | 4.671686664 | 2.781971444 | 0.010913796 | 0.052493597 | -3.010151236 |
| BCO1 | 1.828000373 | -0.51522684 | 2.781596364 | 0.010923059 | 0.052515853 | -3.010925072 |
| HMMR | 2.409028993 | 1.790487376 | 2.781550258 | 0.010924198 | 0.052515853 | -3.011020191 |
| SLC39A11 | 0.634651259 | 5.237995429 | 2.781036936 | 0.010936889 | 0.052562967 | -3.012079152 |
| MCM2 | 1.08802527 | 3.697135137 | 2.779259137 | 0.01098095 | 0.052746846 | -3.015745987 |
| LEO1 | 0.592810369 | 4.767734677 | 2.779018483 | 0.010986927 | 0.052761622 | -3.01624227 |
| CX3CL1 | 0.738868184 | 6.405854237 | 2.778450316 | 0.011001052 | 0.05280197 | -3.017413881 |
| DNMT1 | 0.930130518 | 4.478034174 | 2.778446917 | 0.011001136 | 0.05280197 | -3.01742089 |
| MAFA | 2.001730886 | -2.515197825 | 2.778154451 | 0.011008414 | 0.052822957 | -3.018023938 |
| ATXN2L | 0.69859047 | 5.295706355 | 2.77717681 | 0.011032773 | 0.052895757 | -3.020039567 |
| NAT10 | 0.681433522 | 4.755237013 | 2.777033685 | 0.011036343 | 0.052895757 | -3.020334625 |
| DIP2B | 0.628284143 | 2.860617146 | 2.776962155 | 0.011038128 | 0.052895757 | -3.020482084 |
| LGR4 | 0.874272124 | 3.898093312 | 2.776830205 | 0.011041421 | 0.052897599 | -3.020754095 |
| CMTM5 | -1.754169033 | #NAME? | -2.865269737 | 0.01339297 | 0.05974783 | -3.022972394 |
| YPEL5 | 0.602072261 | 6.934256892 | 2.775646138 | 0.011071015 | 0.053002711 | -3.023194742 |
| PLOD3 | 0.593722134 | 4.607366196 | 2.775400604 | 0.011077161 | 0.053002711 | -3.023700788 |
| KNSTRN | 1.023337612 | 3.180638284 | 2.775388129 | 0.011077473 | 0.053002711 | -3.023726498 |
| RERG | 1.323198296 | 4.632489842 | 2.775269459 | 0.011080445 | 0.053002711 | -3.023971069 |
| RPL22L1 | 0.754028504 | 4.778581932 | 2.775136988 | 0.011083763 | 0.053002711 | -3.024244078 |
| GMIP | 0.832806803 | 3.495669442 | 2.774845065 | 0.011091078 | 0.053023751 | -3.024845677 |
| KPNA1 | 0.613048442 | 4.445169265 | 2.773711591 | 0.011119526 | 0.053103915 | -3.027181287 |
| TRAM2 | 0.7353874 | 3.527741811 | 2.773488337 | 0.011125138 | 0.053116765 | -3.027641266 |
| NAA15 | 0.753666602 | 3.581862413 | 2.772894945 | 0.011140066 | 0.053160125 | -3.028863775 |
| CPD | 0.741569456 | 5.67749969 | 2.771837573 | 0.011166713 | 0.053273306 | -3.031041882 |
| HPCA | 0.963586719 | -1.134548795 | 2.7713027 | 0.011180216 | 0.05329578 | -3.032143535 |
| HDX | 0.814544926 | -0.047812358 | 2.770046817 | 0.011211981 | 0.053433197 | -3.034729832 |
| TP73 | 1.25299927 | 4.008289784 | 2.769801359 | 0.011218199 | 0.053448825 | -3.035235253 |
| TET2 | 0.684842222 | 2.950507299 | 2.768834967 | 0.011242713 | 0.053551592 | -3.037224942 |
| RALGPS2 | 0.659515722 | 2.793244138 | 2.768448761 | 0.011252524 | 0.053579124 | -3.038020004 |
| CFAP74 | 3.15621675 | 3.03036884 | 2.767603711 | 0.011274019 | 0.05365855 | -3.039759491 |
| PAICS | 0.799443474 | 5.187020901 | 2.766501065 | 0.011302126 | 0.053764181 | -3.042028854 |
| OGN | -4.475724971 | #NAME? | -2.771752461 | 0.011477978 | 0.054373146 | -3.043820602 |
| PRICKLE3 | 0.853114467 | 3.132799935 | 2.765226915 | 0.011334687 | 0.053890881 | -3.044650675 |
| HPRT1 | 0.604599257 | 5.012573973 | 2.763933654 | 0.011367827 | 0.054020201 | -3.047311249 |
| PSMC3IP | 0.750894008 | 3.224383182 | 2.763738423 | 0.011372838 | 0.054029895 | -3.04771284 |
| RIMS4 | -2.296194797 | #NAME? | -2.868615179 | 0.014282619 | 0.061804295 | -3.048303377 |
| EEF1A2 | -1.852220703 | #NAME? | -2.769113507 | 0.011545742 | 0.054566233 | -3.049194976 |
| ZNF655 | 0.730616366 | 5.893176069 | 2.762894189 | 0.011394531 | 0.054104684 | -3.049449281 |
| EAF1 | 0.667110732 | 3.557729341 | 2.762681575 | 0.0114 | 0.054116524 | -3.049886553 |
| AKIP1 | 0.625593084 | 5.480789986 | 2.760604147 | 0.011453571 | 0.054297467 | -3.054158266 |
| PALB2 | 0.735354377 | 2.52811107 | 2.758935619 | 0.011496771 | 0.05443983 | -3.0575881 |
| GNAI1 | 0.764988386 | 2.861958941 | 2.758838095 | 0.0114993 | 0.05443983 | -3.057788542 |
| NCKAP1 | 0.748712931 | 5.659512089 | 2.758771223 | 0.011501035 | 0.05443983 | -3.057925982 |
| H3C10 | 1.336901731 | #NAME? | 2.778721081 | 0.012024654 | 0.055871323 | -3.058083294 |
| FBXL22 | -0.585688659 | 1.679805724 | -2.758481835 | 0.011508546 | 0.054447039 | -3.058520737 |
| BLOC1S6 | 0.616160035 | 4.800209238 | 2.757181725 | 0.011542347 | 0.054566233 | -3.06119238 |
| LTK | 1.319209224 | 2.713921828 | 2.756828095 | 0.011551557 | 0.054579531 | -3.061918966 |
| SHF | -0.762134405 | 3.417303377 | -2.756535317 | 0.011559187 | 0.054587219 | -3.06252049 |
| EPN2 | 0.768149519 | 4.077391315 | 2.755096449 | 0.011596757 | 0.054730478 | -3.065476272 |
| TRIM61 | 1.970408478 | -0.441527382 | 2.75488665 | 0.011602245 | 0.054733703 | -3.06590719 |
| UNC5A | -2.167259032 | #NAME? | -2.791743836 | 0.012596555 | 0.057468798 | -3.066118982 |
| GRPEL2 | 0.592249156 | 3.014971005 | 2.754615271 | 0.011609347 | 0.054753004 | -3.066464569 |
| KAZALD1 | -1.234776061 | 2.500889276 | -2.754493416 | 0.011612537 | 0.054753851 | -3.066714835 |
| CLSTN2 | -2.096255853 | -1.382883309 | -2.754203741 | 0.011620125 | 0.054763796 | -3.06730975 |
| MAP3K13 | 0.740513185 | 2.355867778 | 2.754109021 | 0.011622607 | 0.054763796 | -3.067504273 |
| MAFK | 0.595434985 | 5.630567757 | 2.754068051 | 0.01162368 | 0.054763796 | -3.067588411 |
| GRID1 | -1.643000631 | -0.030397621 | -2.752759678 | 0.011658019 | 0.054889486 | -3.070275037 |
| TET3 | 0.814612812 | 2.508618759 | 2.752172999 | 0.011673447 | 0.054912911 | -3.071479536 |
| GABRA2 | -2.794120507 | #NAME? | -2.798844426 | 0.012958142 | 0.058515361 | -3.071793735 |
| IGF2R | 0.750839339 | 3.994603803 | 2.751976923 | 0.011678608 | 0.054922982 | -3.071882069 |
| PIK3CB | 0.660041429 | 4.077795082 | 2.751421237 | 0.011693246 | 0.054969251 | -3.07302279 |
| ATG16L1 | 0.763803361 | 5.403183114 | 2.751192032 | 0.011699289 | 0.054969251 | -3.073493274 |
| FPR1 | 2.257301196 | 3.0714129 | 2.750749019 | 0.011710976 | 0.054969251 | -3.074402585 |
| CCNB2 | 2.157884017 | 3.1937185 | 2.750441597 | 0.011719093 | 0.054969251 | -3.075033548 |
| TGS1 | 0.652380475 | 3.514443085 | 2.750288831 | 0.011723129 | 0.054969251 | -3.075347078 |
| ENKUR | 3.194965915 | 3.861453547 | 2.750238068 | 0.01172447 | 0.054969251 | -3.075451259 |
| RNF44 | 0.737609545 | 4.481177132 | 2.750233295 | 0.011724596 | 0.054969251 | -3.075461055 |
| BAG1 | 0.657444622 | 6.264989137 | 2.750219493 | 0.011724961 | 0.054969251 | -3.075489381 |
| C2CD4C | 2.256965236 | -0.914708939 | 2.750169688 | 0.011726277 | 0.054969251 | -3.075591597 |
| CENPJ | 1.002751042 | 2.810397412 | 2.750114313 | 0.011727741 | 0.054969251 | -3.07570524 |
| AMOT | 0.917034574 | 3.741198534 | 2.749968667 | 0.011731591 | 0.054973129 | -3.076004142 |
| SMPDL3A | 0.832910111 | 4.576576644 | 2.749421847 | 0.011746057 | 0.055026736 | -3.077126281 |
| KLF3 | 0.931475556 | 5.365017653 | 2.747574375 | 0.011795056 | 0.055199405 | -3.080916745 |
| NLRC4 | 1.087023978 | 0.793472322 | 2.747334016 | 0.011801445 | 0.055200895 | -3.081409803 |
| STK10 | 0.792601439 | 3.911727979 | 2.745605703 | 0.011847483 | 0.055373509 | -3.084954569 |
| FAM13B | 0.745920007 | 3.874256279 | 2.744677994 | 0.011872265 | 0.055446587 | -3.086856867 |
| FBXL13 | 0.957588994 | 2.16827831 | 2.743980581 | 0.011890927 | 0.055519487 | -3.088286737 |
| HK1 | 0.857099496 | 6.627491121 | 2.74360076 | 0.011901103 | 0.055531524 | -3.089065395 |
| TTLL5 | 0.911005148 | 3.265753495 | 2.743517077 | 0.011903346 | 0.055531524 | -3.089236944 |
| TIMP3 | -1.146663452 | 5.933802014 | -2.74336311 | 0.011907474 | 0.055531524 | -3.089552567 |
| CD200R1 | 2.132596661 | 1.634736937 | 2.743301359 | 0.011909129 | 0.055531524 | -3.08967915 |
| R3HDM2 | 0.625157744 | 4.784028868 | 2.743071012 | 0.011915308 | 0.055531524 | -3.090151327 |
| IL2RA | 1.75297 | 0.74018338 | 2.742638948 | 0.011926907 | 0.055544872 | -3.091036944 |
| TCF21 | 1.488639962 | #NAME? | 3.764160124 | 0.035777576 | 0.109143026 | -3.091419303 |
| MTUS2 | -1.164041121 | -1.333369159 | -2.742083507 | 0.011941832 | 0.055576201 | -3.092175356 |
| ZBTB20 | -0.786443944 | -1.761675808 | -2.742047456 | 0.011942802 | 0.055576201 | -3.092249242 |
| CTNNA2 | -2.284612903 | #NAME? | -2.753807887 | 0.012297905 | 0.056735085 | -3.093422621 |
| SLC9A3 | 1.699356936 | 6.495732786 | 2.741468479 | 0.01195838 | 0.055628306 | -3.093435769 |
| CDC27 | 0.670619975 | 4.180446201 | 2.740746378 | 0.011977836 | 0.055682243 | -3.094915443 |
| CATSPER4 | 0.84372622 | #NAME? | 2.775046765 | 0.013045174 | 0.058766297 | -3.098341849 |
| CNN1 | -2.401977851 | 3.449746022 | -2.737622024 | 0.012062365 | 0.056032228 | -3.10131553 |
| H3C13 | 1.792137609 | #NAME? | 2.828269402 | 0.018154671 | 0.071063462 | -3.10163253 |
| TRIM34 | 0.646985796 | 3.268261711 | 2.737161196 | 0.01207488 | 0.056076041 | -3.102259223 |
| ZFAND4 | 0.765176917 | 2.778832968 | 2.7361408 | 0.012102636 | 0.056140584 | -3.104348547 |
| SCG2 | 2.618775361 | 4.668407449 | 2.735843932 | 0.012110723 | 0.056156453 | -3.104956335 |
| FAM72C | 1.792589764 | #NAME? | 2.791986399 | 0.013779696 | 0.060589352 | -3.105678648 |
| GPR78 | 1.358613245 | -2.942187553 | 2.735353666 | 0.012124089 | 0.056189775 | -3.105960004 |
| NUP58 | 0.691728307 | 4.25287364 | 2.735187682 | 0.012128617 | 0.056190339 | -3.106299786 |
| EXOC3L1 | -0.600532958 | 0.940885472 | -2.73453435 | 0.012146456 | 0.056250435 | -3.107637112 |
| C14orf180 | -2.269725763 | #NAME? | -2.76133718 | 0.012926027 | 0.058432195 | -3.108041206 |
| NCAPD2 | 1.051885373 | 4.464869495 | 2.733624721 | 0.012171335 | 0.056336958 | -3.109498813 |
| MRPS31 | 0.721581789 | 5.552037382 | 2.73282623 | 0.012193214 | 0.05638792 | -3.111132811 |
| DNAAF5 | 0.785998291 | 4.342018162 | 2.731213541 | 0.012237517 | 0.056527029 | -3.114432263 |
| MEOX2 | -2.536340863 | -0.882634288 | -2.73117747 | 0.012238509 | 0.056527029 | -3.114506051 |
| CD55 | 1.303402805 | 7.819208189 | 2.730493044 | 0.012257359 | 0.056591095 | -3.115906054 |
| CDC20B | 2.886916279 | 3.458382429 | 2.730115556 | 0.012267766 | 0.056624772 | -3.116678142 |
| ABO | 1.307344236 | 3.774423686 | 2.729727185 | 0.012278483 | 0.056659857 | -3.117472435 |
| MIF | 0.600161028 | 9.295765735 | 2.728676804 | 0.012307512 | 0.056750611 | -3.119620399 |
| PRRG3 | -1.286752495 | 0.353483705 | -2.727813739 | 0.012331412 | 0.056817599 | -3.121385021 |
| C1QC | 1.628534181 | 5.853455085 | 2.727311582 | 0.012345338 | 0.056841663 | -3.122411609 |
| ZNF572 | 0.816567827 | 1.127567777 | 2.727098382 | 0.012351256 | 0.056841663 | -3.122847441 |
| ABHD5 | 0.661352979 | 3.58704016 | 2.727062101 | 0.012352263 | 0.056841663 | -3.122921605 |
| TNNT3 | 1.478580696 | 3.247008582 | 2.726112811 | 0.012378644 | 0.056942167 | -3.124861967 |
| PLS3 | 0.730101169 | 5.877643689 | 2.725999278 | 0.012381803 | 0.056942167 | -3.125094008 |
| LOC101059906 | 1.807750211 | -1.951844897 | 2.725627297 | 0.012392157 | 0.056967587 | -3.125854241 |
| CALM1 | 0.612961882 | 8.196015945 | 2.725406682 | 0.012398302 | 0.056968704 | -3.126305097 |
| ITCH | 0.607704757 | 4.111289272 | 2.725220535 | 0.012403489 | 0.056976474 | -3.1266855 |
| RBM27 | 0.657672176 | 3.203277343 | 2.724252519 | 0.012430497 | 0.057071705 | -3.128663503 |
| TPP2 | 0.671010978 | 4.180224859 | 2.723690334 | 0.012446208 | 0.057114997 | -3.129812095 |
| PLA2G4D | 0.985017432 | -1.212459693 | 2.723502098 | 0.012451472 | 0.057121895 | -3.130196651 |
| C1QTNF6 | 0.689186555 | 3.719594357 | 2.723412001 | 0.012453993 | 0.057121895 | -3.130380711 |
| PPP1R9A | -1.912246166 | 0.13471967 | -2.722494194 | 0.012479697 | 0.057205659 | -3.132255538 |
| ZBTB7C | 1.185873875 | 4.725228515 | 2.72199124 | 0.012493804 | 0.057205659 | -3.133282808 |
| C9orf72 | 0.979394003 | 4.371189968 | 2.721981389 | 0.012494081 | 0.057205659 | -3.133302927 |
| NEK9 | 0.59480184 | 4.835592224 | 2.721974475 | 0.012494275 | 0.057205659 | -3.133317047 |
| MATN3 | 1.176857478 | 1.813231751 | 2.721419139 | 0.012509869 | 0.057238444 | -3.134451199 |
| TDRD1 | -0.758558307 | -0.15487022 | -2.721383251 | 0.012510877 | 0.057238444 | -3.134524488 |
| KIF3B | 0.764120806 | 4.773272713 | 2.721084315 | 0.01251928 | 0.057262482 | -3.135134949 |
| BAZ1B | 0.680574432 | 4.437652914 | 2.720284333 | 0.012541793 | 0.057322202 | -3.136768446 |
| RASA1 | 0.664763405 | 4.288839674 | 2.720076656 | 0.012547643 | 0.057334533 | -3.137192469 |
| NUDT2 | 0.614333622 | 5.681523277 | 2.719904565 | 0.012552493 | 0.057342287 | -3.13754382 |
| ZNF680 | 0.840649057 | 3.651133244 | 2.719311868 | 0.012569211 | 0.057389824 | -3.138753833 |
| MAST2 | 0.591836071 | 4.348815177 | 2.718639386 | 0.012588204 | 0.05746212 | -3.140126576 |
| MDFI | 0.966572359 | 5.000646375 | 2.718483366 | 0.012592615 | 0.057467828 | -3.140445039 |
| ARSB | 0.837617323 | 1.984180761 | 2.716933565 | 0.012636505 | 0.057542159 | -3.143607962 |
| NEK7 | 0.70224666 | 4.762966092 | 2.716758327 | 0.012641477 | 0.057546409 | -3.143965544 |
| PDE2A | -1.645048976 | 1.871278893 | -2.716473928 | 0.01264955 | 0.057568748 | -3.14454585 |
| DEFB124 | -2.347445667 | #NAME? | -2.680373767 | 0.015349675 | 0.064394275 | -3.145700216 |
| SLC34A2 | 4.001078287 | 3.501773525 | 2.715652938 | 0.012672882 | 0.057610189 | -3.146220893 |
| TUBA4B | 3.229724873 | 4.782987645 | 2.715608375 | 0.012674149 | 0.057610189 | -3.146311807 |
| PYGL | 0.839902335 | 5.506178047 | 2.715596226 | 0.012674495 | 0.057610189 | -3.146336592 |
| CNST | 0.706387848 | 3.827518129 | 2.714500536 | 0.012705701 | 0.057737599 | -3.148571698 |
| PARP11 | 0.633274715 | 2.89717155 | 2.713611369 | 0.012731078 | 0.057817234 | -3.150385201 |
| SMCO2 | 0.863618788 | -0.158094837 | 2.713552397 | 0.012732763 | 0.057817234 | -3.150505467 |
| TRIM9 | -1.926087053 | -0.930876246 | -2.712977822 | 0.012749189 | 0.057862927 | -3.15167718 |
| SLC45A4 | 1.003130847 | 3.655439151 | 2.712643556 | 0.012758754 | 0.057891893 | -3.152358785 |
| RBBP8 | 0.675551453 | 4.896249982 | 2.711365117 | 0.012795401 | 0.058043691 | -3.15496529 |
| MCMBP | 0.608921465 | 4.866795633 | 2.711049632 | 0.012804459 | 0.058066908 | -3.155608417 |
| ZBED3 | -1.008538045 | 0.669160473 | -2.71096451 | 0.012806905 | 0.058066908 | -3.155781935 |
| IL27RA | 1.010213098 | 3.137865762 | 2.710831653 | 0.012810722 | 0.058069738 | -3.156052753 |
| LGALS9C | 1.808758598 | 3.287745151 | 2.710203388 | 0.012828788 | 0.058137139 | -3.157333337 |
| PHIP | 0.59879952 | 3.736892999 | 2.709854746 | 0.012838824 | 0.058168124 | -3.158043907 |
| SPDL1 | 0.825320434 | 3.11331634 | 2.709734874 | 0.012842276 | 0.058169274 | -3.15828821 |
| DRAM1 | 0.921599339 | 4.419036687 | 2.708417888 | 0.012880263 | 0.058312288 | -3.160971921 |
| BCL3 | 0.903517568 | 5.60026748 | 2.708248001 | 0.012885171 | 0.058319989 | -3.161318067 |
| KLF14 | -0.929802802 | #NAME? | -2.733605938 | 0.013711673 | 0.060451027 | -3.162155445 |
| FAM104B | 0.870991128 | 5.633951401 | 2.707739199 | 0.01289988 | 0.058372038 | -3.162354689 |
| PKNOX2 | -1.36274101 | -0.195403141 | -2.707485345 | 0.012907225 | 0.058376223 | -3.162871851 |
| NAF1 | 0.746063864 | 3.507376873 | 2.707145022 | 0.012917078 | 0.05840626 | -3.163565135 |
| IL23A | 1.03012513 | 1.775872624 | 2.706680121 | 0.012930549 | 0.058438112 | -3.164512135 |
| BASP1 | 1.290912208 | 6.515111459 | 2.706516939 | 0.012935281 | 0.058444972 | -3.164844516 |
| MVB12B | 0.712054236 | 3.083223342 | 2.705898686 | 0.012953222 | 0.058511499 | -3.166103734 |
| ARL1 | 0.638935032 | 6.508081775 | 2.705214567 | 0.012973102 | 0.058540511 | -3.167496943 |
| HNF4G | 1.184342896 | 1.514852666 | 2.705178677 | 0.012974146 | 0.058540511 | -3.167570029 |
| KIAA0586 | 0.651917195 | 2.523982305 | 2.705123883 | 0.01297574 | 0.058540511 | -3.167681609 |
| TRIM4 | 0.744225598 | 4.545156762 | 2.704610124 | 0.012990691 | 0.058578901 | -3.168727752 |
| REC8 | 1.022671491 | 5.906880523 | 2.702779499 | 0.013044099 | 0.058766297 | -3.172454596 |
| CSE1L | 0.702899659 | 5.088249535 | 2.702202224 | 0.013060984 | 0.058822944 | -3.173629579 |
| UBE2U | 1.947247025 | #NAME? | 2.683837099 | 0.016399769 | 0.066886342 | -3.173657821 |
| AQP10 | 2.580258961 | 0.022129668 | 2.701993261 | 0.013067101 | 0.05882805 | -3.174054872 |
| ZSCAN31 | 1.301006786 | 3.615966008 | 2.701856331 | 0.01307111 | 0.05882805 | -3.174333551 |
| GLIS3 | 1.132861471 | 3.478905855 | 2.700682324 | 0.013105538 | 0.058937594 | -3.176722602 |
| PINLYP | 0.782628147 | 4.096364535 | 2.700625877 | 0.013107195 | 0.058937594 | -3.176837458 |
| TEX44 | 1.701779155 | #NAME? | 2.733844431 | 0.014218999 | 0.061612276 | -3.177567731 |
| MARCKS | 0.773983292 | 6.345745442 | 2.700224277 | 0.013118993 | 0.058950531 | -3.177654573 |
| SERPINB1 | 1.108787915 | 7.149613041 | 2.700131231 | 0.013121728 | 0.058950531 | -3.17784388 |
| TTK | 2.207874089 | 1.540178526 | 2.699911819 | 0.013128179 | 0.058964947 | -3.178290274 |
| SP110 | 0.862821765 | 4.316191402 | 2.697850234 | 0.013188942 | 0.059179396 | -3.182483727 |
| CCP110 | 1.064410473 | 4.011817328 | 2.697124065 | 0.013210408 | 0.059246479 | -3.183960455 |
| ZBTB2 | 0.647394356 | 3.210372309 | 2.696188296 | 0.013238118 | 0.059341488 | -3.185863139 |
| WNT10A | 1.300136564 | 2.832308246 | 2.695453027 | 0.01325993 | 0.05939289 | -3.187357929 |
| NFAT5 | 0.928602991 | 4.339507885 | 2.694710765 | 0.013281983 | 0.059450197 | -3.188866734 |
| TSPAN18 | -1.598510752 | 1.612493317 | -2.694451776 | 0.013289687 | 0.059470039 | -3.189393136 |
| PHF20 | 0.58965418 | 3.508694264 | 2.694305702 | 0.013294033 | 0.059474855 | -3.189690026 |
| C7orf57 | 2.76179098 | 3.928768558 | 2.694103509 | 0.013300052 | 0.059487147 | -3.190100962 |
| TASOR | 0.639977071 | 4.362504565 | 2.693773511 | 0.01330988 | 0.059506784 | -3.190771617 |
| FRMD3 | -1.121273212 | 0.423051846 | -2.693643807 | 0.013313745 | 0.059506784 | -3.191035203 |
| RSPH3 | 0.930357989 | 3.959733327 | 2.693467671 | 0.013318995 | 0.059513328 | -3.191393139 |
| SORCS2 | 1.54235642 | 0.806996224 | 2.691408266 | 0.013380526 | 0.059744229 | -3.195577339 |
| ERAP1 | 0.845968169 | 5.168363684 | 2.69128426 | 0.01338424 | 0.059746142 | -3.195829239 |
| TMEM106B | 0.645536331 | 4.074972223 | 2.690606493 | 0.013404554 | 0.059748828 | -3.197205925 |
| BOLL | 1.424512926 | #NAME? | 2.753940616 | 0.015646984 | 0.065125775 | -3.197596085 |
| DNAJB13 | 2.688949131 | 4.967991034 | 2.689988989 | 0.013423087 | 0.059816777 | -3.19846006 |
| ARHGAP11A | 1.669176074 | 1.905530643 | 2.689185605 | 0.013447236 | 0.059909709 | -3.200091501 |
| MGARP | 1.93397985 | 3.803881667 | 2.688443737 | 0.013469572 | 0.059953381 | -3.201597814 |
| SPOPL | 0.637515548 | 3.059032442 | 2.688371796 | 0.01347174 | 0.059953381 | -3.201743874 |
| AKR1E2 | -0.993905788 | 1.489860373 | -2.688237531 | 0.013475786 | 0.059953381 | -3.202016466 |
| CTSV | 1.469422056 | 3.136310578 | 2.688182997 | 0.01347743 | 0.059953381 | -3.202127181 |
| PRKAG3 | -1.002584453 | -1.125255068 | -2.68798463 | 0.013483412 | 0.059953381 | -3.202529898 |
| RBPMS2 | -1.054603634 | 0.654792541 | -2.687182486 | 0.013507626 | 0.060017024 | -3.204158236 |
| TNFAIP8L1 | 1.408457723 | 5.40222966 | 2.687034143 | 0.013512108 | 0.060022275 | -3.204459343 |
| TPX2 | 2.20077424 | 2.826052383 | 2.686916817 | 0.013515654 | 0.060023366 | -3.204697488 |
| RGR | -1.277797424 | #NAME? | -2.710701942 | 0.014394845 | 0.062038141 | -3.206691286 |
| PIWIL4 | -0.749093006 | 1.289856698 | -2.685712693 | 0.013552099 | 0.06015584 | -3.207141278 |
| SHQ1 | 0.696229444 | 3.815533839 | 2.685431256 | 0.013560631 | 0.060179023 | -3.207712382 |
| MIS18A | 0.696802494 | 3.855469918 | 2.685204512 | 0.013567508 | 0.060194854 | -3.208172482 |
| ESYT3 | -0.73350743 | -1.025432495 | -2.684896149 | 0.013576866 | 0.060198256 | -3.208798167 |
| ANKK1 | 1.149825753 | 3.270806293 | 2.684836713 | 0.013578671 | 0.060198256 | -3.208918761 |
| HDC | 1.858501609 | 3.781964153 | 2.684598816 | 0.013585896 | 0.060198256 | -3.20940144 |
| SMCR8 | 0.770148827 | 3.177141357 | 2.684416134 | 0.013591446 | 0.060198256 | -3.209772074 |
| CDKN2B | 1.520071952 | 1.575994941 | 2.683950065 | 0.013605616 | 0.06020412 | -3.210717607 |
| ANGPTL1 | -3.139204538 | -0.117816307 | -2.683719301 | 0.013612638 | 0.060209013 | -3.211185737 |
| POP1 | 0.790004997 | 1.748325766 | 2.683376271 | 0.013623081 | 0.060209013 | -3.211881574 |
| EMC3 | 0.590360086 | 6.590091519 | 2.683336487 | 0.013624293 | 0.060209013 | -3.211962273 |
| H3-4 | 1.358928386 | #NAME? | 3.531384413 | 0.041826366 | 0.12068131 | -3.212553168 |
| CBARP | 0.975201668 | 0.3010957 | 2.683043246 | 0.013633227 | 0.060209013 | -3.212557076 |
| UHRF1 | 1.825567332 | 2.31168042 | 2.683009004 | 0.01363427 | 0.060209013 | -3.212626529 |
| SPICE1 | 0.737528334 | 2.446078071 | 2.682868782 | 0.013638545 | 0.060209013 | -3.21291094 |
| TRAPPC8 | 0.703621078 | 4.256118623 | 2.681320481 | 0.013685827 | 0.060380991 | -3.21605085 |
| SRRM3 | 1.311460134 | 1.424318575 | 2.681056127 | 0.013693915 | 0.060402023 | -3.216586865 |
| VXN | -1.625799854 | 0.763979924 | -2.679979042 | 0.013726917 | 0.060503564 | -3.218770537 |
| IL1R1 | 0.993598798 | 5.730919119 | 2.679644028 | 0.013737197 | 0.060534203 | -3.219449655 |
| RRM2 | 2.220817612 | 3.608822127 | 2.679462113 | 0.013742782 | 0.060544145 | -3.219818405 |
| LMTK3 | 1.288779593 | 2.393427343 | 2.678990026 | 0.013757286 | 0.060564028 | -3.220775287 |
| SFTPD | -0.914375238 | 0.955141189 | -2.678641506 | 0.013768003 | 0.060589352 | -3.221481656 |
| FAM172A | 0.669901818 | 3.741073322 | 2.677476036 | 0.013803898 | 0.06066074 | -3.223843467 |
| GRIK2 | -1.469661466 | 1.040035623 | -2.677409861 | 0.013805939 | 0.06066074 | -3.223977554 |
| TM7SF2 | -0.760850304 | 5.789139356 | -2.677083564 | 0.013816006 | 0.060672953 | -3.224638693 |
| CSNK1A1L | -1.069287445 | #NAME? | -2.80355712 | 0.018935291 | 0.073080899 | -3.225724197 |
| WDR4 | 0.777658361 | 3.291173802 | 2.676448221 | 0.013835627 | 0.060703188 | -3.225925906 |
| CEP85L | -1.116239685 | 1.90233968 | -2.676026715 | 0.013848659 | 0.060745709 | -3.226779801 |
| SUDS3 | 0.620182355 | 4.848804546 | 2.675506238 | 0.013864767 | 0.060801699 | -3.2278341 |
| GCLC | 1.587723326 | 5.87540503 | 2.674719612 | 0.013889145 | 0.060879086 | -3.229427335 |
| ZNF24 | 0.600464586 | 4.530145342 | 2.674618624 | 0.013892278 | 0.060879086 | -3.229631861 |
| EPOP | 1.164297198 | 0.869826998 | 2.674584386 | 0.01389334 | 0.060879086 | -3.229701199 |
| POLK | 0.777480158 | 2.85715279 | 2.674504972 | 0.013895804 | 0.060879086 | -3.229862027 |
| CHMP1B | 0.741424639 | 6.447974126 | 2.673962486 | 0.013912647 | 0.060938198 | -3.230960605 |
| IL1RN | 2.463326848 | 3.19564585 | 2.672482407 | 0.013958699 | 0.061103561 | -3.233957327 |
| SLC41A1 | 0.779499394 | 3.56544318 | 2.672425244 | 0.01396048 | 0.061103561 | -3.234073048 |
| OMD | -2.517033826 | 1.018890103 | -2.672040175 | 0.013972487 | 0.061130963 | -3.234852558 |
| TAOK1 | 0.678526376 | 2.850208657 | 2.671323567 | 0.013994856 | 0.061172815 | -3.236303069 |
| CGREF1 | -2.981303818 | -0.523623992 | -2.671174054 | 0.013999528 | 0.061172815 | -3.236605679 |
| PPP4R4 | 1.245405919 | 0.379237242 | 2.671163759 | 0.013999849 | 0.061172815 | -3.236626516 |
| CPLANE2 | 0.800038487 | 3.157426343 | 2.670935859 | 0.014006973 | 0.061172896 | -3.237087763 |
| EP300 | 0.936851571 | 3.45330847 | 2.67084036 | 0.014009959 | 0.061172896 | -3.237281036 |
| ACAN | -2.80015011 | #NAME? | -2.687629068 | 0.014638779 | 0.062654938 | -3.237989114 |
| A1BG | 0.669821971 | 2.066210362 | 2.670466427 | 0.014021657 | 0.061179906 | -3.238037787 |
| EMILIN3 | -1.541734598 | -0.526823752 | -2.670227094 | 0.014029149 | 0.061183237 | -3.238522109 |
| PXDNL | 1.658575574 | -2.380832313 | 2.669740798 | 0.014044383 | 0.061234992 | -3.239506133 |
| LRRC56 | 1.24825582 | 4.058444845 | 2.669484707 | 0.014052412 | 0.061240634 | -3.240024298 |
| GFPT1 | 0.740379536 | 5.176830024 | 2.668440035 | 0.014085209 | 0.061331406 | -3.242137802 |
| WDR82 | 0.6374692 | 5.506195925 | 2.668303226 | 0.01408951 | 0.061331406 | -3.242414555 |
| NLGN3 | -1.017159917 | 0.472205457 | -2.668216933 | 0.014092223 | 0.061331406 | -3.242589114 |
| CCK | 2.519106254 | 1.275613477 | 2.668019747 | 0.014098425 | 0.061331406 | -3.242987984 |
| AP1S3 | 0.794964966 | 2.635182738 | 2.668006725 | 0.014098834 | 0.061331406 | -3.243014326 |
| USP6NL | 0.721289881 | 3.041511158 | 2.667640841 | 0.014110349 | 0.061360785 | -3.243754401 |
| CLNK | 1.315103953 | 0.844678868 | 2.667118932 | 0.014126789 | 0.061410336 | -3.244809983 |
| ZBTB18 | 0.621092241 | 4.400563384 | 2.667033619 | 0.014129478 | 0.061410336 | -3.244982522 |
| GPA33 | 1.751292143 | #NAME? | 2.677614635 | 0.01452836 | 0.062412108 | -3.245427596 |
| XKR6 | 0.870737666 | 0.168217849 | 2.666778869 | 0.01413751 | 0.061420153 | -3.245497719 |
| DNAAF10 | 0.693182607 | 4.315645808 | 2.666505301 | 0.014146141 | 0.061442971 | -3.246050947 |
| CCDC68 | -0.988612363 | 1.441632696 | -2.665912853 | 0.014164849 | 0.061509537 | -3.247248939 |
| APOBEC3B | 2.021383244 | #NAME? | 2.676585261 | 0.014560973 | 0.062424764 | -3.247468301 |
| FUZ | 1.420810229 | 5.428874042 | 2.665537334 | 0.014176719 | 0.061534811 | -3.24800821 |
| SLX1A | 0.662069117 | 6.141151834 | 2.66551464 | 0.014177436 | 0.061534811 | -3.248054092 |
| COL9A3 | -1.183798039 | 2.525545977 | -2.665305036 | 0.014184066 | 0.061548898 | -3.248477873 |
| EXOC8 | 0.64112155 | 2.831962278 | 2.664660447 | 0.014204473 | 0.061612276 | -3.249781005 |
| MCOLN3 | -1.368140594 | 0.849840786 | -2.664356229 | 0.014214114 | 0.061612276 | -3.250395974 |
| SEMA3E | -2.002115628 | -0.948852436 | -2.66425261 | 0.014217399 | 0.061612276 | -3.250605428 |
| DTX3L | 0.865818293 | 4.683779193 | 2.66424022 | 0.014217792 | 0.061612276 | -3.250630473 |
| TMEM237 | 0.747858056 | 3.841402617 | 2.663788102 | 0.014232135 | 0.061654503 | -3.251544335 |
| LOC101928268 | -1.212926628 | #NAME? | -2.615944988 | 0.024241714 | 0.085703695 | -3.252295125 |
| CDH15 | -2.855475441 | #NAME? | -2.631449107 | 0.017591581 | 0.069623613 | -3.253350764 |
| LIMA1 | 0.71487544 | 6.68079866 | 2.662250598 | 0.014281012 | 0.061804295 | -3.254651503 |
| CYP2C9 | -1.025024219 | 0.839844037 | -2.662234941 | 0.01428151 | 0.061804295 | -3.25468314 |
| TMEM254 | 0.789734098 | 5.449444708 | 2.66202735 | 0.014288122 | 0.061804295 | -3.255102597 |
| DEUP1 | 2.461736447 | 1.590612362 | 2.661952667 | 0.014290501 | 0.061804295 | -3.255253497 |
| CCDC103 | 2.355655387 | 3.363654968 | 2.66178652 | 0.014295796 | 0.061812493 | -3.255589194 |
| FIGLA | 1.679504373 | #NAME? | 3.452578685 | 0.044171454 | 0.124969206 | -3.255902451 |
| GUCA1B | -0.681192061 | 2.497600193 | -2.661502243 | 0.014304859 | 0.061829612 | -3.25616355 |
| IGSF6 | 0.919191472 | 2.637384397 | 2.661449078 | 0.014306555 | 0.061829612 | -3.25627096 |
| PERP | 0.932644783 | 9.175982947 | 2.661047313 | 0.014319375 | 0.061870313 | -3.257082629 |
| FOXD4L6 | -1.714282303 | #NAME? | -2.821211567 | 0.031139846 | 0.099832677 | -3.25795165 |
| APC | 0.636417714 | 2.212615854 | 2.660615849 | 0.014333154 | 0.061900437 | -3.25795423 |
| DCAF1 | 0.771771677 | 3.326389575 | 2.659314301 | 0.014374797 | 0.062021364 | -3.26058307 |
| CCNJ | 0.942552976 | 2.267094786 | 2.657556745 | 0.01443121 | 0.062123603 | -3.264131939 |
| SLC52A1 | 1.285158037 | 3.026989511 | 2.65751188 | 0.014432653 | 0.062123603 | -3.264222515 |
| MAP3K8 | 0.7408212 | 4.805011227 | 2.656914911 | 0.014451863 | 0.062176859 | -3.265427646 |
| ELN | 1.257662531 | 5.707067031 | 2.655584832 | 0.014494752 | 0.062331889 | -3.268112264 |
| CHTF8 | 1.503488766 | #NAME? | 2.659927498 | 0.014707245 | 0.062821149 | -3.269518049 |
| FAM216B | 3.357197694 | 4.766366446 | 2.654456634 | 0.014531225 | 0.062412108 | -3.270388886 |
| LAMP3 | 1.366943458 | 3.402869054 | 2.654213633 | 0.014539092 | 0.062412108 | -3.270879183 |
| SLK | 0.748350039 | 5.063961284 | 2.654089776 | 0.014543104 | 0.062412108 | -3.271129077 |
| XXYLT1 | 0.623006423 | 3.559172263 | 2.654053364 | 0.014544283 | 0.062412108 | -3.271202542 |
| SEC11C | -0.848431941 | 7.330039955 | -2.654053057 | 0.014544293 | 0.062412108 | -3.271203162 |
| SH2D1B | 1.985378622 | 0.468662853 | 2.653730263 | 0.014554753 | 0.06241716 | -3.271854399 |
| SLCO4C1 | 1.029796145 | 3.33678232 | 2.652120827 | 0.014607014 | 0.062577891 | -3.275100861 |
| PKHD1L1 | -1.425052144 | -1.369968631 | -2.651571678 | 0.014624885 | 0.062624951 | -3.27620835 |
| ITSN1 | 0.606357066 | 3.5189597 | 2.651176539 | 0.014637758 | 0.062654938 | -3.277005172 |
| TUBA1C | 1.030367966 | 7.125797491 | 2.650975347 | 0.014644316 | 0.06266389 | -3.277410865 |
| ZBTB1 | 0.663332778 | 5.150988089 | 2.650640735 | 0.01465523 | 0.062695838 | -3.278085559 |
| ADAM11 | -1.171111821 | -0.382208992 | -2.649825289 | 0.014681858 | 0.062765461 | -3.279729603 |
| LRRC61 | 1.128641248 | 4.492788672 | 2.64935634 | 0.014697192 | 0.062816249 | -3.280674953 |
| CABP1 | -0.992049316 | 0.329197026 | -2.648752474 | 0.01471696 | 0.062826374 | -3.281892158 |
| SRFBP1 | 0.704707885 | 2.925888385 | 2.648545431 | 0.014723744 | 0.062826374 | -3.28230946 |
| FOXJ1 | 3.040065967 | 6.551237836 | 2.648005497 | 0.014741448 | 0.062887162 | -3.28339764 |
| RTKN2 | 1.541300143 | 1.465923449 | 2.647628826 | 0.014753811 | 0.062908778 | -3.284156714 |
| PDZD2 | 0.962617635 | 2.348060566 | 2.647450403 | 0.01475967 | 0.062908778 | -3.284516257 |
| TRIM31 | 2.209644041 | 1.479204182 | 2.647429652 | 0.014760352 | 0.062908778 | -3.284558072 |
| SAC3D1 | 0.765993093 | 3.470188733 | 2.647220949 | 0.014767209 | 0.062923255 | -3.284978616 |
| CERS1 | -1.570541616 | -1.144234069 | -2.646831835 | 0.014780001 | 0.062963011 | -3.28576265 |
| CCDC61 | 0.681017834 | 4.506842033 | 2.646516653 | 0.01479037 | 0.062990402 | -3.286397676 |
| SESN1 | 0.592552463 | 3.821468976 | 2.646425878 | 0.014793358 | 0.062990402 | -3.286580561 |
| CFAP61 | 2.541668013 | 2.749861448 | 2.645796319 | 0.014814095 | 0.063058738 | -3.287848856 |
| DYNLT1 | 0.870236157 | 8.476827499 | 2.645530621 | 0.014822854 | 0.063058738 | -3.288384079 |
| TMEM150B | 1.960855871 | 0.224049215 | 2.645201123 | 0.014833725 | 0.063088427 | -3.289047786 |
| PCSK2 | -3.509704459 | #NAME? | -2.682808877 | 0.016434194 | 0.066907894 | -3.290705583 |
| EXPH5 | 0.669729129 | 3.455466991 | 2.643627096 | 0.014885755 | 0.06326533 | -3.292217776 |
| TEKT1 | 3.149690871 | 5.940100219 | 2.643267181 | 0.014897677 | 0.063301203 | -3.29294249 |
| CLDN7 | 0.764567547 | 8.218934027 | 2.642919899 | 0.014909188 | 0.063335318 | -3.29364172 |
| ADD3 | 0.790677319 | 5.885660178 | 2.641791217 | 0.014946659 | 0.063464846 | -3.295913934 |
| IFNB1 | -0.961507594 | #NAME? | -3.046883132 | 0.040078081 | 0.117387659 | -3.296062568 |
| MNDA | 1.301071226 | 3.607403117 | 2.641224167 | 0.014965518 | 0.063489672 | -3.297055311 |
| AP2B1 | 0.632117705 | 5.716581714 | 2.640423171 | 0.014992195 | 0.063578942 | -3.298667376 |
| SRI | 0.85815054 | 7.258011491 | 2.640353852 | 0.014994506 | 0.063578942 | -3.298806875 |
| FAM131B | 1.078958872 | -0.091294253 | 2.639747646 | 0.015014728 | 0.06362588 | -3.300026734 |
| LSP1 | 0.88602391 | 6.987329985 | 2.639538566 | 0.015021709 | 0.06363494 | -3.300447429 |
| RAP2B | 0.915730717 | 3.283385855 | 2.639379788 | 0.015027012 | 0.063642581 | -3.300766901 |
| TAF13 | 0.88279432 | 4.83206694 | 2.638522646 | 0.015055672 | 0.063703472 | -3.302491355 |
| EHD2 | 0.79848332 | 4.712694068 | 2.638216821 | 0.01506591 | 0.063703472 | -3.303106566 |
| FAXDC2 | -0.87069079 | 4.406683999 | -2.637874931 | 0.015077363 | 0.063716385 | -3.303794287 |
| DRC7 | 2.808648995 | 3.731658956 | 2.637811922 | 0.015079474 | 0.063716385 | -3.303921026 |
| DHX40 | 0.727306179 | 4.953149015 | 2.637102029 | 0.015103285 | 0.063772542 | -3.305348832 |
| MC3R | -1.309759861 | #NAME? | -3.363730567 | 0.047022942 | 0.130220684 | -3.306254653 |
| PROSER2 | 1.037157774 | 3.685288373 | 2.63595027 | 0.015141991 | 0.063921135 | -3.307664956 |
| FPR2 | 3.216924465 | #NAME? | 2.640581711 | 0.015346678 | 0.064394275 | -3.308124004 |
| IFIT5 | 0.79417661 | 3.247905393 | 2.635474367 | 0.015158011 | 0.063959071 | -3.308621822 |
| PLEKHG7 | 2.209336323 | 4.139404118 | 2.635366146 | 0.015161657 | 0.063959613 | -3.308839404 |
| LDOC1 | -0.717072404 | 2.795415572 | -2.634779184 | 0.015181442 | 0.063983711 | -3.310019428 |
| NCKAP5L | 0.6106064 | 3.313398832 | 2.634386105 | 0.015194706 | 0.06400846 | -3.310809596 |
| SMPD3 | 1.540431491 | 2.134839022 | 2.634107683 | 0.015204107 | 0.064019888 | -3.311369246 |
| SMARCAD1 | 1.06844343 | 4.170689346 | 2.633530088 | 0.015223628 | 0.064081581 | -3.312530163 |
| PAPOLG | 0.684083591 | 2.92811483 | 2.633465692 | 0.015225806 | 0.064081581 | -3.312659585 |
| NDRG1 | 1.003846717 | 8.031849236 | 2.632782236 | 0.015248939 | 0.06416409 | -3.314033091 |
| CCDC74B | 2.153281698 | 4.577404566 | 2.632590696 | 0.015255427 | 0.064167137 | -3.314417987 |
| ZNF558 | 0.687769678 | 3.703496452 | 2.63244845 | 0.015260248 | 0.064167137 | -3.31470382 |
| TTC12 | 1.18943195 | 5.546225086 | 2.632306087 | 0.015265074 | 0.064172592 | -3.314989878 |
| CIBAR2 | 3.151723293 | 6.238491949 | 2.632084819 | 0.015272577 | 0.064189298 | -3.315434471 |
| PCDH15 | -2.570309917 | #NAME? | -2.654401263 | 0.01621515 | 0.066455745 | -3.315532389 |
| RPS10-NUDT3 | 3.665958336 | #NAME? | 2.52735746 | 0.024305866 | 0.08584451 | -3.315789916 |
| HMGCR | 0.706935755 | 4.332326374 | 2.631453619 | 0.015294002 | 0.064239539 | -3.316702634 |
| SRD5A3 | 1.15210791 | 4.784518008 | 2.630673452 | 0.015320521 | 0.064301638 | -3.318269883 |
| SLITRK4 | -2.229614387 | #NAME? | -2.651460205 | 0.016316035 | 0.066634498 | -3.321192629 |
| CKAP2 | 1.285521774 | 3.616111467 | 2.628862835 | 0.015382235 | 0.064501112 | -3.321906266 |
| KDM1B | 0.974258117 | 3.329396757 | 2.628630006 | 0.015390188 | 0.064519583 | -3.322373783 |
| SKOR1 | -1.009229914 | -1.48783135 | -2.628303508 | 0.015401346 | 0.064534375 | -3.323029347 |
| CLUAP1 | 0.981253844 | 5.769832322 | 2.628215695 | 0.015404349 | 0.064534375 | -3.323205658 |
| ATP10D | 0.705195948 | 2.791793774 | 2.628215315 | 0.015404362 | 0.064534375 | -3.32320642 |
| HSD17B11 | 0.745444872 | 5.673702783 | 2.628040587 | 0.015410338 | 0.064544542 | -3.323557229 |
| NHSL1 | 0.877330455 | 2.694120617 | 2.62728891 | 0.015436071 | 0.064622556 | -3.325066267 |
| DESI2 | 0.593626006 | 4.383618811 | 2.626463563 | 0.015464373 | 0.06472614 | -3.326722955 |
| EFCAB11 | 0.703311541 | 3.623679737 | 2.626060878 | 0.015478199 | 0.064756675 | -3.327531152 |
| TTC5 | 0.713964598 | 2.867492446 | 2.626013321 | 0.015479832 | 0.064756675 | -3.327626598 |
| REXO5 | 1.021007321 | 2.739642664 | 2.625940026 | 0.01548235 | 0.064756675 | -3.327773693 |
| SIN3A | 0.607855569 | 4.413595045 | 2.625590271 | 0.015494371 | 0.064777159 | -3.328475594 |
| MANEA | 0.895021519 | 2.681323699 | 2.625295796 | 0.0155045 | 0.064788456 | -3.32906652 |
| DSG3 | 1.944729678 | 1.806007873 | 2.625200993 | 0.015507761 | 0.064788456 | -3.329256756 |
| CCDC190 | 2.482669345 | 3.795024386 | 2.623831371 | 0.015554959 | 0.064924851 | -3.332004704 |
| TAF9B | 0.602072198 | 4.261948967 | 2.623735742 | 0.015558259 | 0.064924851 | -3.332196542 |
| CPVL | 0.804136036 | 4.731627194 | 2.623119541 | 0.015579542 | 0.064983841 | -3.333432603 |
| GGT5 | -1.223797606 | 4.624718269 | -2.622634076 | 0.015596328 | 0.065036501 | -3.334406313 |
| CBLL1 | 0.609238002 | 3.506838576 | 2.62254763 | 0.015599319 | 0.065036501 | -3.334579691 |
| LIMS1 | 0.607815452 | 4.804540172 | 2.62176974 | 0.015626257 | 0.065089125 | -3.336139709 |
| VPS13C | 0.770850214 | 3.88397144 | 2.62159969 | 0.015632152 | 0.065098768 | -3.336480705 |
| ALMS1 | 0.913449871 | 1.675814846 | 2.620934334 | 0.015655236 | 0.065125775 | -3.337814814 |
| CENPF | 2.098985217 | 1.255628866 | 2.620807917 | 0.015659626 | 0.065125775 | -3.338068276 |
| DCXR | -0.669267689 | 6.790851851 | -2.620793574 | 0.015660124 | 0.065125775 | -3.338097031 |
| PLPP4 | 1.890460716 | 2.073670203 | 2.620649674 | 0.015665122 | 0.065131667 | -3.338385536 |
| MAGED1 | 0.602791259 | 7.517852684 | 2.620285736 | 0.01567777 | 0.065154461 | -3.339115157 |
| CTSB | 0.687674038 | 9.354717695 | 2.620131747 | 0.015683124 | 0.065161822 | -3.339423859 |
| E2F3 | 1.122643872 | 2.065213077 | 2.619633863 | 0.015700448 | 0.065188645 | -3.340421904 |
| POLH | 0.634901402 | 3.411304355 | 2.619592409 | 0.015701891 | 0.065188645 | -3.340504997 |
| ANP32E | 0.847429835 | 5.242741282 | 2.619371848 | 0.015709572 | 0.065188645 | -3.340947095 |
| ABCB10 | 0.591134056 | 4.116352387 | 2.619233928 | 0.015714377 | 0.065188645 | -3.341223536 |
| B4GALT1 | 0.595866618 | 6.216510884 | 2.619088308 | 0.015719451 | 0.065188645 | -3.341515401 |
| DRD4 | -0.71589228 | 0.74639726 | -2.619029563 | 0.015721499 | 0.065188645 | -3.341633141 |
| GIPR | 1.353802945 | 4.790474323 | 2.618254645 | 0.015748531 | 0.065229693 | -3.343186149 |
| CHST8 | -1.631491687 | #NAME? | -2.639617404 | 0.016728357 | 0.067544827 | -3.343958603 |
| CCDC86 | 0.654736843 | 4.129675199 | 2.616431843 | 0.015812292 | 0.06544432 | -3.346838304 |
| GSR | 0.956623424 | 6.179731977 | 2.615976499 | 0.015828257 | 0.065486474 | -3.347750429 |
| LILRA1 | 1.344250238 | -0.225319973 | 2.615935985 | 0.015829679 | 0.065486474 | -3.347831581 |
| GORAB | 0.609478938 | 3.899832085 | 2.615605293 | 0.015841284 | 0.06551958 | -3.348493952 |
| ABCG1 | 0.855893462 | 5.169644135 | 2.615301764 | 0.015851943 | 0.065548759 | -3.34910188 |
| IL34 | -0.751211671 | 3.114469597 | -2.614182046 | 0.015891323 | 0.065657308 | -3.351344215 |
| VGLL4 | 0.608203282 | 6.395246785 | 2.61310773 | 0.015929193 | 0.0657108 | -3.353495172 |
| PLSCR3 | 0.590710423 | 4.709748705 | 2.613060024 | 0.015930876 | 0.0657108 | -3.353590676 |
| SLC6A20 | 1.235717211 | 2.879647977 | 2.612814812 | 0.015939533 | 0.065731597 | -3.354081565 |
| ZNF474 | 2.73844649 | 3.134905697 | 2.612151935 | 0.015962956 | 0.065813265 | -3.355408454 |
| HACD3 | 0.603978944 | 5.49347401 | 2.6120033 | 0.015968212 | 0.065820015 | -3.355705956 |
| SOCS1 | 1.000968302 | 3.871653335 | 2.611523964 | 0.015985175 | 0.06585465 | -3.356665317 |
| CEP170 | 0.782271245 | 2.806404149 | 2.611458919 | 0.015987478 | 0.06585465 | -3.356795493 |
| OAS2 | 1.143104164 | 4.754358054 | 2.609472994 | 0.016057947 | 0.066114969 | -3.360769193 |
| UBXN10 | 2.491422601 | 4.297561346 | 2.609207059 | 0.016067405 | 0.066128828 | -3.361301195 |
| SGK1 | 1.265747232 | 7.811196966 | 2.609173891 | 0.016068585 | 0.066128828 | -3.361367547 |
| MYO16 | 1.262124473 | -2.750709288 | 2.608671369 | 0.016086474 | 0.06618747 | -3.362372757 |
| ALDH1L1 | -1.116566725 | 5.153348167 | -2.60853708 | 0.016091258 | 0.066192177 | -3.362641364 |
| PCNX4 | 0.812325789 | 4.325929369 | 2.608279326 | 0.016100443 | 0.066200013 | -3.363156905 |
| STK31 | -1.5901336 | -0.453933888 | -2.608022336 | 0.016109606 | 0.066222624 | -3.363670895 |
| ARID3A | 0.603088654 | 1.969647347 | 2.607859185 | 0.016115426 | 0.066222624 | -3.363997188 |
| GBGT1 | 0.668151267 | 2.595600251 | 2.607430709 | 0.016130719 | 0.066264572 | -3.36485407 |
| RHOC | 0.642098362 | 8.528369261 | 2.606980505 | 0.016146803 | 0.066315664 | -3.365754328 |
| PRKCZ | 0.620132005 | 5.025420606 | 2.60667893 | 0.016157585 | 0.066321034 | -3.366357332 |
| LRP1 | 0.803418237 | 4.408708921 | 2.606637954 | 0.016159051 | 0.066321034 | -3.366439262 |
| RALYL | -1.396271711 | #NAME? | -2.61108641 | 0.01637228 | 0.066800579 | -3.366723011 |
| ZNF586 | 0.683199013 | 3.223405571 | 2.605589419 | 0.016196595 | 0.066445135 | -3.368535536 |
| ARMC9 | 0.908839907 | 3.836632535 | 2.605455959 | 0.01620138 | 0.066449774 | -3.368802323 |
| ABCA8 | -2.040564177 | 1.363321486 | -2.604993602 | 0.016217966 | 0.066455745 | -3.369726525 |
| CYBA | 0.869776892 | 9.049797719 | 2.604861348 | 0.016222713 | 0.066455745 | -3.369990872 |
| CD4 | 1.205430046 | 4.501591195 | 2.604702542 | 0.016228416 | 0.066455745 | -3.370308282 |
| ZNF497 | 0.857834619 | 2.114825157 | 2.603701135 | 0.016264415 | 0.066573184 | -3.372309589 |
| ARL5B | 0.816451594 | 3.220772555 | 2.603527967 | 0.016270648 | 0.066577519 | -3.372655625 |
| CDC73 | 0.669986422 | 3.361418819 | 2.603291101 | 0.016279177 | 0.066578635 | -3.373128926 |
| HES6 | 1.673000928 | 4.712183287 | 2.603257408 | 0.016280391 | 0.066578635 | -3.373196251 |
| SPAG17 | 2.782586598 | 3.674784243 | 2.602994924 | 0.016289848 | 0.066585013 | -3.373720714 |
| ZBTB26 | 0.686304335 | 2.589475442 | 2.602820563 | 0.016296133 | 0.066585013 | -3.374069084 |
| NTRK3 | -1.752631822 | 1.006045333 | -2.602807728 | 0.016296596 | 0.066585013 | -3.374094729 |
| ZNRF1 | 0.59085922 | 4.085623172 | 2.602684535 | 0.016301038 | 0.066588202 | -3.374340859 |
| KCNJ13 | -2.564304029 | #NAME? | -2.606957598 | 0.016520896 | 0.067094465 | -3.374900297 |
| RASAL2 | 0.855019964 | 2.285224568 | 2.601255125 | 0.016352663 | 0.066754343 | -3.377196283 |
| C11orf94 | 1.360170571 | #NAME? | 2.603623078 | 0.022022229 | 0.080607953 | -3.377294324 |
| SMIM31 | 0.792201566 | 3.130991828 | 2.600636098 | 0.016375068 | 0.066800579 | -3.378432619 |
| DDN | 1.278656048 | #NAME? | 2.604372711 | 0.016614584 | 0.067309608 | -3.380016552 |
| FANCA | 1.004798643 | 2.387266055 | 2.599823001 | 0.01640454 | 0.0668908 | -3.380056329 |
| SOST | -3.069130771 | #NAME? | -2.714574268 | 0.03578086 | 0.109143026 | -3.380726866 |
| BTNL9 | -1.951883921 | 2.735376132 | -2.599357222 | 0.016421446 | 0.066907894 | -3.380986347 |
| ALPK1 | 0.673178415 | 4.221511593 | 2.599093414 | 0.016431028 | 0.066907894 | -3.381513053 |
| OR13A1 | 1.344229164 | -0.698181208 | 2.598983444 | 0.016435024 | 0.066907894 | -3.381732606 |
| ANOS1 | 1.70058882 | 3.761448647 | 2.598977393 | 0.016435244 | 0.066907894 | -3.381744687 |
| CENPU | 1.174524007 | 3.137190657 | 2.598712428 | 0.016444876 | 0.06692023 | -3.382273664 |
| PLXNA1 | 0.793404273 | 4.450354784 | 2.598579037 | 0.016449727 | 0.066924995 | -3.382539956 |
| EIF3A | 0.636890676 | 6.077261805 | 2.598028887 | 0.016469748 | 0.066974722 | -3.38363816 |
| BARD1 | 0.918141527 | 2.168771398 | 2.598006563 | 0.016470561 | 0.066974722 | -3.383682721 |
| HELZ2 | 0.629525047 | 3.51255807 | 2.597685553 | 0.016482254 | 0.066997379 | -3.384323459 |
| FERMT2 | -0.758393356 | 4.137126417 | -2.59736599 | 0.016493903 | 0.067014771 | -3.384961271 |
| ARID1A | 0.664759569 | 4.207279628 | 2.596635264 | 0.016520567 | 0.067094465 | -3.386419565 |
| FAM50B | 0.649889263 | 3.78666013 | 2.596291165 | 0.016533138 | 0.067129191 | -3.387106205 |
| SULT4A1 | 2.107447107 | -1.011551053 | 2.596069534 | 0.016541239 | 0.067129917 | -3.387548437 |
| STPG1 | 1.17053236 | 3.780783977 | 2.596065103 | 0.016541401 | 0.067129917 | -3.387557279 |
| EVPL | 1.062260445 | 4.376968419 | 2.595789865 | 0.016551467 | 0.067143651 | -3.38810645 |
| ASIC4 | -1.287540083 | #NAME? | -2.599864138 | 0.016779194 | 0.067655508 | -3.388934395 |
| ZFP91 | 0.653576312 | 4.392986508 | 2.595056877 | 0.016578302 | 0.067237513 | -3.389568807 |
| CIPC | 0.684543021 | 4.957822646 | 2.594733542 | 0.016590153 | 0.067255019 | -3.390213812 |
| CFAP99 | 2.865458301 | 2.848651038 | 2.594718296 | 0.016590712 | 0.067255019 | -3.390244225 |
| RAD51AP2 | 1.317214688 | -0.95703393 | 2.59455782 | 0.016596597 | 0.067255019 | -3.390564334 |
| GPNMB | 1.009963749 | 6.495139191 | 2.594535601 | 0.016597412 | 0.067255019 | -3.390608656 |
| NSD2 | 0.772097971 | 4.308948085 | 2.593768437 | 0.016625572 | 0.067339121 | -3.392138812 |
| DPY30 | 0.632516503 | 7.190888485 | 2.593053866 | 0.016651842 | 0.067392934 | -3.39356386 |
| ZNF551 | 0.946578562 | 1.562804809 | 2.593034019 | 0.016652572 | 0.067392934 | -3.393603437 |
| NOLC1 | 0.627364371 | 5.387858921 | 2.593003886 | 0.016653681 | 0.067392934 | -3.393663526 |
| WDR5B | 0.675338837 | 3.296902011 | 2.59286016 | 0.01665897 | 0.067393511 | -3.393950126 |
| RFFL | 0.692003356 | 3.411491046 | 2.592798625 | 0.016661235 | 0.067393511 | -3.39407283 |
| HNRNPA2B1 | 0.661816572 | 8.667079208 | 2.592056675 | 0.016688568 | 0.067489058 | -3.395552192 |
| METAP1 | 0.774265481 | 5.581455577 | 2.591859462 | 0.01669584 | 0.067502198 | -3.395945376 |
| NEURL1 | 0.80628853 | 0.992585896 | 2.591576386 | 0.016706283 | 0.067502198 | -3.396509718 |
| CDC20 | 1.837350515 | 4.162861198 | 2.591566071 | 0.016706664 | 0.067502198 | -3.396530281 |
| USP8 | 0.636107099 | 4.530917308 | 2.591198944 | 0.016720218 | 0.067541955 | -3.397262138 |
| HUNK | 0.928014662 | 2.501948432 | 2.591004524 | 0.0167274 | 0.067544827 | -3.397649687 |
| LRP8 | 1.026918029 | 1.724385092 | 2.590569532 | 0.016743479 | 0.067575878 | -3.398516729 |
| ATP1B3 | 1.002363486 | 7.574406624 | 2.59005844 | 0.01676239 | 0.06763719 | -3.399535363 |
| MORC3 | 0.867472828 | 4.499322007 | 2.589951493 | 0.016766349 | 0.06763816 | -3.399748501 |
| GNB1L | 0.666814184 | 0.854593684 | 2.589332187 | 0.016789296 | 0.067655508 | -3.400982645 |
| PACC1 | 0.63221466 | 2.786290938 | 2.589177656 | 0.016795026 | 0.067655508 | -3.401290569 |
| PLEK2 | 0.727185429 | 4.502687929 | 2.589166579 | 0.016795437 | 0.067655508 | -3.401312641 |
| ANKDD1A | -0.715933721 | 2.575398704 | -2.589104986 | 0.016797721 | 0.067655508 | -3.40143537 |
| KLF7 | 0.941174395 | 1.894224648 | 2.589087859 | 0.016798357 | 0.067655508 | -3.401469497 |
| KDM4D | 0.757190973 | 0.179015948 | 2.588936552 | 0.01680397 | 0.067655508 | -3.401770983 |
| ADGRB3 | -2.502286617 | -0.373120704 | -2.588932218 | 0.016804131 | 0.067655508 | -3.401779618 |
| ESRP2 | 0.610190583 | 5.008425182 | 2.588673007 | 0.016813752 | 0.067666624 | -3.402296084 |
| KDM5A | 0.603816905 | 2.929817806 | 2.588657336 | 0.016814334 | 0.067666624 | -3.402327307 |
| PKP1 | 1.546551757 | 4.603569728 | 2.588208323 | 0.016831012 | 0.067711755 | -3.40322188 |
| CCZ1 | 0.705656218 | 4.780599493 | 2.588154985 | 0.016832995 | 0.067711755 | -3.403328141 |
| DDI2 | 0.620219762 | 3.731812293 | 2.587894234 | 0.016842689 | 0.067735766 | -3.403847596 |
| ADAR | 0.670731257 | 6.09641458 | 2.587725098 | 0.016848979 | 0.067742867 | -3.404184525 |
| HOOK1 | 0.81718234 | 3.81863722 | 2.587646476 | 0.016851904 | 0.067742867 | -3.404341141 |
| PLEKHA1 | 0.896676691 | 4.641482731 | 2.587526003 | 0.016856387 | 0.067745912 | -3.404581121 |
| NELL1 | 3.868675233 | #NAME? | 2.529989913 | 0.01998346 | 0.075633549 | -3.406267415 |
| PFN2 | 0.68168187 | 7.038486753 | 2.58663472 | 0.016889587 | 0.067863978 | -3.406356357 |
| RAD50 | 0.628238901 | 3.675737196 | 2.585991071 | 0.0169136 | 0.067890081 | -3.407638166 |
| SNX16 | 0.799084006 | 2.859792161 | 2.585989184 | 0.016913671 | 0.067890081 | -3.407641923 |
| FAM210A | 0.619998201 | 2.42228881 | 2.585753318 | 0.016922478 | 0.06790114 | -3.408111604 |
| CIDEC | 0.637029677 | 1.488259056 | 2.585389276 | 0.016936081 | 0.06790114 | -3.408836476 |
| RIMBP2 | 1.517675351 | 0.286255202 | 2.585211201 | 0.016942739 | 0.06791286 | -3.409191036 |
| LRRK1 | 1.197073277 | 3.748970737 | 2.58460609 | 0.01696538 | 0.067975364 | -3.410395763 |
| CIBAR1 | 0.59562932 | 3.368836963 | 2.584405522 | 0.016972891 | 0.067988766 | -3.410795045 |
| FBXW12 | 1.507315385 | #NAME? | 2.612472359 | 0.024391536 | 0.085965983 | -3.411897277 |
| ID2 | -0.772423168 | 6.773871214 | -2.583561309 | 0.01700454 | 0.068100541 | -3.412475493 |
| ETHE1 | 0.756405957 | 6.265760044 | 2.582480854 | 0.017045125 | 0.068248051 | -3.414625782 |
| C12orf56 | 2.3559554 | 0.939722967 | 2.581826994 | 0.017069731 | 0.068331526 | -3.41592685 |
| TEKT4 | 2.150243316 | 3.941558335 | 2.581581262 | 0.017078987 | 0.068345791 | -3.41641577 |
| EHD1 | 0.623483555 | 4.290683289 | 2.581433122 | 0.017084569 | 0.068345791 | -3.416710504 |
| RGS2 | 1.225601654 | 6.495578413 | 2.58117919 | 0.017094141 | 0.068369046 | -3.417215699 |
| PDE5A | -1.031987897 | 1.62908077 | -2.579851203 | 0.017144284 | 0.068536236 | -3.4198573 |
| TRRAP | 0.633951934 | 3.228853777 | 2.579842901 | 0.017144598 | 0.068536236 | -3.419873811 |
| FLT4 | -0.820202668 | 2.155579915 | -2.579614203 | 0.017153248 | 0.068545147 | -3.420328661 |
| FCHO2 | 0.704951944 | 3.802351581 | 2.577974777 | 0.017215371 | 0.068717897 | -3.423588647 |
| GPR162 | 2.061444825 | 4.22331775 | 2.577531511 | 0.017232204 | 0.068754907 | -3.424469894 |
| SMYD1 | -1.562173711 | #NAME? | -2.708651715 | 0.030883879 | 0.099352168 | -3.426073664 |
| MAT1A | 1.722788881 | 2.079498862 | 2.576436391 | 0.017273858 | 0.068860669 | -3.426646744 |
| KIAA1210 | -1.223642314 | -2.302847738 | -2.575947531 | 0.017292482 | 0.068919807 | -3.427618332 |
| TMEM63C | 1.877525936 | 0.575045367 | 2.57569663 | 0.017302048 | 0.068942824 | -3.42811695 |
| CYP2B6 | 1.8205762 | 6.034188631 | 2.574575081 | 0.01734487 | 0.069055056 | -3.430345509 |
| BMPER | -1.214324197 | -1.603594791 | -2.574448839 | 0.017349696 | 0.069055056 | -3.430596324 |
| ZNF229 | 1.737438199 | -0.501458996 | 2.574362517 | 0.017352997 | 0.069055056 | -3.430767824 |
| CCDC187 | 3.013051715 | 3.235334194 | 2.573725178 | 0.017377386 | 0.069136982 | -3.432033961 |
| FCN1 | 1.427945028 | 1.604637833 | 2.572820371 | 0.017412066 | 0.069226751 | -3.433831173 |
| ZNFX1 | 0.752902814 | 4.235674471 | 2.572739318 | 0.017415176 | 0.069226751 | -3.433992153 |
| TRIM38 | 0.656337442 | 4.263266607 | 2.572552425 | 0.017422348 | 0.069240128 | -3.434363329 |
| DLX2 | -1.354134994 | #NAME? | -2.632613205 | 0.020847169 | 0.077961466 | -3.43453202 |
| CARMIL1 | -0.795849425 | 3.850306849 | -2.572113317 | 0.017439211 | 0.069256227 | -3.435235363 |
| TMEM107 | 0.998728801 | 4.07806102 | 2.572077062 | 0.017440604 | 0.069256227 | -3.435307359 |
| OXT | 1.204206441 | #NAME? | 2.585915272 | 0.018194811 | 0.071161966 | -3.435834979 |
| RAB27A | 0.659934685 | 4.588482976 | 2.571788095 | 0.01745171 | 0.069259834 | -3.435881177 |
| PCNT | 0.593253755 | 2.766522993 | 2.57172944 | 0.017453966 | 0.069259834 | -3.435997648 |
| ADAMTS17 | -1.239297046 | 1.136679824 | -2.571481667 | 0.017463495 | 0.069282531 | -3.436489632 |
| HPGDS | 1.815030644 | 3.13936574 | 2.571150636 | 0.017476234 | 0.069317949 | -3.437146897 |
| UBE2C | 2.208306033 | 4.416472718 | 2.569646504 | 0.017534228 | 0.069499656 | -3.440132816 |
| TDRD6 | -0.754370183 | -0.09603839 | -2.569303154 | 0.017547492 | 0.069522928 | -3.44081429 |
| IRAK3 | 1.226811122 | 3.664227764 | 2.56921625 | 0.01755085 | 0.069522928 | -3.440986768 |
| SACM1L | 0.691229028 | 4.941850481 | 2.568674125 | 0.017571815 | 0.069590818 | -3.442062648 |
| SPDYE16 | 0.956108076 | 0.800061531 | 2.56834581 | 0.017584523 | 0.069614897 | -3.442714153 |
| ZNF816 | 0.760016128 | 3.677738966 | 2.56802661 | 0.017596887 | 0.069629457 | -3.443347529 |
| GBP6 | 1.336362031 | 3.059298182 | 2.566639429 | 0.017650711 | 0.069812055 | -3.44609958 |
| HYOU1 | 0.710188419 | 5.561417855 | 2.566282593 | 0.017664581 | 0.069851724 | -3.446807388 |
| LRP6 | -0.794457059 | 2.880221713 | -2.566058271 | 0.017673306 | 0.069855093 | -3.44725232 |
| HSDL2 | 0.646822193 | 4.34008673 | 2.565998632 | 0.017675627 | 0.069855093 | -3.447370607 |
| MAPKAPK3 | 0.607692656 | 4.82637351 | 2.565964443 | 0.017676957 | 0.069855093 | -3.447438417 |
| ASB16 | 0.646880946 | 2.217015166 | 2.56584919 | 0.017681442 | 0.069857637 | -3.447667004 |
| ZNF57 | 0.64404277 | 3.246008777 | 2.565597341 | 0.017691246 | 0.069863597 | -3.448166488 |
| JRKL | 0.817739506 | 3.48583904 | 2.565385541 | 0.017699496 | 0.069863597 | -3.448586524 |
| ODF2 | 0.829186092 | 5.164473456 | 2.565324654 | 0.017701868 | 0.069863597 | -3.448707272 |
| CNMD | -3.225884202 | #NAME? | -2.597976322 | 0.019526402 | 0.07447717 | -3.448708935 |
| NUP188 | 0.704414563 | 4.080717453 | 2.564475421 | 0.017734985 | 0.069928418 | -3.45039125 |
| PCSK6 | 2.247999325 | 3.705791287 | 2.564403069 | 0.017737809 | 0.069928418 | -3.450534707 |
| NPAS4 | -1.850532003 | -2.569584951 | -2.563309442 | 0.017780548 | 0.070066532 | -3.452702845 |
| CDCA4 | 1.019997561 | 3.858330898 | 2.562926092 | 0.017795552 | 0.070098509 | -3.45346273 |
| LPCAT1 | 0.747654714 | 4.88883359 | 2.562905162 | 0.017796372 | 0.070098509 | -3.453504217 |
| ZDHHC2 | 0.725157289 | 4.044212622 | 2.562579121 | 0.017809143 | 0.070133623 | -3.454150454 |
| C5 | 0.622805918 | 1.421516486 | 2.56184257 | 0.017838025 | 0.070219452 | -3.455610193 |
| TEAD1 | 0.651074895 | 3.429420365 | 2.561673594 | 0.017844657 | 0.070227859 | -3.45594505 |
| LOC102724474 | 1.179821188 | #NAME? | 2.600768753 | 0.020190129 | 0.076225386 | -3.457776777 |
| C1QB | 1.745598184 | 6.421514775 | 2.560467479 | 0.017892064 | 0.070399193 | -3.458334846 |
| NUP153 | 0.726241533 | 3.858815622 | 2.560217137 | 0.017901918 | 0.070422731 | -3.458830801 |
| ZRANB1 | 0.798376279 | 3.496431259 | 2.560079666 | 0.017907332 | 0.070428792 | -3.459103135 |
| CFP | 1.050189609 | 2.49808296 | 2.559909559 | 0.017914033 | 0.070439913 | -3.459440111 |
| FAM167B | 0.724430917 | 3.356740603 | 2.559281879 | 0.017938779 | 0.070506728 | -3.460683423 |
| SLCO2B1 | 1.184052636 | 3.336913006 | 2.55863721 | 0.017964228 | 0.070591497 | -3.461960221 |
| DMP1 | -2.754937605 | #NAME? | -2.641094364 | 0.023183477 | 0.083257249 | -3.462175179 |
| NR6A1 | 0.694951375 | 1.557236239 | 2.55850865 | 0.017969307 | 0.070592869 | -3.462214821 |
| SPHK2 | 0.619629965 | 3.936638837 | 2.558431885 | 0.017972341 | 0.070592869 | -3.462366843 |
| DOT1L | 0.599787702 | 3.41658449 | 2.557944571 | 0.017991609 | 0.070638038 | -3.463331841 |
| RAB36 | 1.756691179 | 4.382794782 | 2.556617426 | 0.018044181 | 0.070813869 | -3.465959416 |
| SLC11A1 | 1.657524569 | 1.248165068 | 2.556324283 | 0.018055812 | 0.07084423 | -3.466539706 |
| SLFN13 | 0.833678891 | 5.424149636 | 2.555964708 | 0.01807009 | 0.070871325 | -3.467251453 |
| LILRA6 | 1.295516518 | -0.501068508 | 2.555834923 | 0.018075245 | 0.070871325 | -3.467508337 |
| POLA2 | 0.676697173 | 4.143392233 | 2.555757894 | 0.018078306 | 0.070871325 | -3.4676608 |
| VRK1 | 0.697020049 | 4.283045858 | 2.555495651 | 0.01808873 | 0.070896267 | -3.468179831 |
| ALKAL1 | 1.759508677 | 0.946019352 | 2.555401706 | 0.018092465 | 0.070896267 | -3.468365761 |
| KIAA0319 | 1.561167752 | 1.452256645 | 2.55392908 | 0.018151115 | 0.071063462 | -3.471279813 |
| KHDRBS3 | 0.925356304 | 3.656075547 | 2.553487597 | 0.018168733 | 0.071087903 | -3.472153254 |
| NRTN | -1.106616042 | 1.841981151 | -2.552817899 | 0.018195488 | 0.071161966 | -3.473478053 |
| PPP1R3C | -0.934689234 | 3.263265633 | -2.55233302 | 0.018214882 | 0.07120719 | -3.474437127 |
| DPP10 | 1.242203118 | 0.991937893 | 2.551887359 | 0.018232725 | 0.071261624 | -3.475318546 |
| CDX1 | 1.758673121 | #NAME? | 2.558767394 | 0.018787876 | 0.072743521 | -3.478633723 |
| SCGB2A2 | -3.482955045 | #NAME? | -2.669168265 | 0.032680132 | 0.10262837 | -3.47922804 |
| SCARB1 | 0.586166485 | 4.032897252 | 2.549446625 | 0.018330734 | 0.071537958 | -3.480144348 |
| HTN1 | -3.933822272 | #NAME? | -2.828803641 | 0.049521656 | 0.13459884 | -3.481702783 |
| MFHAS1 | 0.699474113 | 2.787568876 | 2.54859033 | 0.018365236 | 0.071579704 | -3.481836836 |
| WDR97 | 1.147191942 | 1.67312986 | 2.548589348 | 0.018365276 | 0.071579704 | -3.481838776 |
| CFAP97D2 | 2.577182401 | 0.54328242 | 2.545763481 | 0.018479567 | 0.071906982 | -3.487422051 |
| NTSR1 | 1.886090019 | #NAME? | 2.503958298 | 0.022864028 | 0.082451954 | -3.487971958 |
| RELT | 0.925721863 | 2.314939612 | 2.545127796 | 0.018505368 | 0.071971478 | -3.488677573 |
| SOSTDC1 | -1.403505424 | 2.236149057 | -2.542849008 | 0.018598138 | 0.072270459 | -3.493176983 |
| CYB5R2 | -0.780701255 | 5.591854981 | -2.542536904 | 0.018610878 | 0.072289071 | -3.49379306 |
| AGR3 | 2.432957893 | 6.940237365 | 2.541574577 | 0.01865021 | 0.072392168 | -3.495692391 |
| ABCC5 | 1.485087748 | 5.213710771 | 2.54155723 | 0.01865092 | 0.072392168 | -3.495726625 |
| CDHR4 | 2.729793066 | 5.158292113 | 2.54149801 | 0.018653343 | 0.072392168 | -3.495843493 |
| RBAK | 0.617882196 | 2.931089352 | 2.540798819 | 0.018681974 | 0.072472798 | -3.497223218 |
| GABBR2 | 2.45829774 | -2.130805869 | 2.540407467 | 0.018698017 | 0.072488197 | -3.497995392 |
| NDE1 | 0.742869562 | 4.063424051 | 2.539534919 | 0.018733832 | 0.072596096 | -3.499716784 |
| ZDHHC9 | 0.678527916 | 3.44566106 | 2.539273295 | 0.018744584 | 0.072622284 | -3.500232864 |
| UTS2 | 2.944729546 | #NAME? | 2.475376567 | 0.021977595 | 0.080533718 | -3.500815932 |
| NBN | 0.750011676 | 4.144067846 | 2.53786274 | 0.01880265 | 0.072760895 | -3.503014845 |
| LPL | -1.807548242 | 1.218421854 | -2.537316601 | 0.018825177 | 0.072810436 | -3.504091753 |
| MICALL1 | 0.682308016 | 4.238242957 | 2.53693845 | 0.01884079 | 0.072855328 | -3.504837342 |
| NAA50 | 0.593501799 | 5.069925902 | 2.536357163 | 0.018864813 | 0.072932715 | -3.505983333 |
| HROB | 1.188248032 | 1.272981689 | 2.536132078 | 0.018874123 | 0.072950566 | -3.506427046 |
| ABTB2 | -1.025324367 | 0.406683636 | -2.53603463 | 0.018878155 | 0.072950566 | -3.506619138 |
| P2RY13 | 1.44349526 | 1.513337925 | 2.53595466 | 0.018881465 | 0.072950566 | -3.506776776 |
| ADGRA1 | 2.751307622 | #NAME? | 2.48681456 | 0.023018453 | 0.082844566 | -3.507860821 |
| EPHA6 | -0.6275194 | -1.308414217 | -2.534281971 | 0.01895081 | 0.073125277 | -3.510073386 |
| DNAH3 | 2.862915787 | 3.964178283 | 2.533226383 | 0.018994695 | 0.073270409 | -3.512153195 |
| ISL1 | 1.318769773 | 3.41466692 | 2.532834637 | 0.019011005 | 0.073284331 | -3.512924929 |
| TNPO1 | 0.627298638 | 4.147360799 | 2.53280647 | 0.019012178 | 0.073284331 | -3.512980416 |
| GALNT3 | 0.803588494 | 5.014566085 | 2.532572025 | 0.019021946 | 0.073299671 | -3.513442236 |
| ATAD1 | 0.757470134 | 4.880342837 | 2.532477816 | 0.019025873 | 0.073299671 | -3.513627806 |
| DMRTC1 | -1.146570798 | #NAME? | -2.549637574 | 0.020200767 | 0.076233898 | -3.51551175 |
| NFYA | 0.658982396 | 3.212507875 | 2.531375444 | 0.019071874 | 0.073436608 | -3.515798965 |
| MGAM | 1.641935749 | 0.005776948 | 2.53127818 | 0.019075938 | 0.073436707 | -3.515990504 |
| TRIM25 | 0.672701952 | 4.576373594 | 2.530767925 | 0.01909727 | 0.07347217 | -3.516995278 |
| ACOX2 | -1.096020712 | 3.208895677 | -2.530462119 | 0.019110065 | 0.073489339 | -3.517597408 |
| YY2 | 0.789745038 | 0.192142716 | 2.530371567 | 0.019113855 | 0.073489339 | -3.517775697 |
| CELA3B | 1.505326541 | #NAME? | 2.583350062 | 0.029919681 | 0.097268381 | -3.518567453 |
| ATP8B1 | 0.750241915 | 4.501148045 | 2.529499582 | 0.019150391 | 0.073598694 | -3.519492384 |
| PIP5K1B | -0.892580314 | 3.147658829 | -2.529357061 | 0.019156369 | 0.073606112 | -3.519772938 |
| WDR38 | 3.39287354 | 5.760437257 | 2.528804761 | 0.019179551 | 0.073669818 | -3.520860063 |
| IER5L | 0.778014164 | 3.840447586 | 2.528769048 | 0.019181051 | 0.073669818 | -3.520930355 |
| SEMG1 | -1.456169315 | #NAME? | -2.617628021 | 0.025999108 | 0.089413137 | -3.524044267 |
| AGPAT5 | 0.69365059 | 3.093924116 | 2.526381691 | 0.019281565 | 0.073930958 | -3.525628049 |
| WASHC4 | 0.668466386 | 3.942791274 | 2.525946539 | 0.019299939 | 0.07398581 | -3.52648406 |
| ZNF431 | 0.653814404 | 2.724621611 | 2.525735055 | 0.019308874 | 0.074004466 | -3.526900055 |
| EHD3 | 1.007137618 | 3.001819288 | 2.525572132 | 0.019315761 | 0.07401526 | -3.527220515 |
| ZNF627 | 0.658210238 | 3.719065951 | 2.524927123 | 0.019343047 | 0.074084729 | -3.528489105 |
| KLHL28 | 0.659082479 | 2.555480137 | 2.524854737 | 0.019346111 | 0.074084729 | -3.528631461 |
| ENO4 | 2.380495405 | 0.928661194 | 2.5244495 | 0.019363275 | 0.074119242 | -3.529428371 |
| TACSTD2 | 0.814424683 | 9.456208035 | 2.523084447 | 0.019421196 | 0.074294043 | -3.532112288 |
| SRGN | 1.018967504 | 7.504130988 | 2.522692588 | 0.019437854 | 0.074326494 | -3.532882605 |
| SEC16B | -0.943626612 | 1.001163611 | -2.522305312 | 0.019454329 | 0.074351328 | -3.53364385 |
| GRAP | -1.182929603 | 3.334299714 | -2.522213364 | 0.019458242 | 0.074351328 | -3.533824578 |
| HIF1A | 0.846026046 | 5.627192122 | 2.521940935 | 0.019469842 | 0.074351328 | -3.534360026 |
| ANKIB1 | 0.715724824 | 3.788085705 | 2.521811838 | 0.019475341 | 0.074351328 | -3.534613751 |
| PIR | 1.163792088 | 5.120725257 | 2.52162983 | 0.019483096 | 0.074358781 | -3.534971454 |
| ZBED6CL | 0.67334542 | 2.66739395 | 2.520779888 | 0.01951935 | 0.07446589 | -3.536641678 |
| INTS6 | 0.62237068 | 3.64460831 | 2.519804097 | 0.019561049 | 0.074567509 | -3.538558836 |
| CDSN | 1.364459289 | -2.153246885 | 2.519667849 | 0.019566878 | 0.074567509 | -3.538826495 |
| RNF148 | -1.223651878 | #NAME? | -2.542838598 | 0.021114959 | 0.078607296 | -3.538938178 |
| HPSE2 | -2.360543399 | -1.116283014 | -2.519581152 | 0.019570588 | 0.074567509 | -3.538996806 |
| ARSK | 0.648228073 | 1.81617099 | 2.518863682 | 0.019601316 | 0.074658352 | -3.540406118 |
| ELOVL6 | 0.9069951 | 1.010379738 | 2.518459436 | 0.019618648 | 0.074703672 | -3.541200076 |
| SPRR1B | 3.2556235 | 2.075705633 | 2.518327356 | 0.019624315 | 0.074709605 | -3.541459471 |
| COG6 | 0.591890494 | 4.200123512 | 2.51806777 | 0.019635455 | 0.074736373 | -3.541969261 |
| PRKAA1 | 0.591314819 | 4.935542346 | 2.517727266 | 0.019650078 | 0.074760735 | -3.542637918 |
| LOXL1 | 1.122773077 | 5.157367355 | 2.517041013 | 0.019679579 | 0.0748444 | -3.543985386 |
| BCL2A1 | 1.546967995 | 3.967563397 | 2.517024262 | 0.019680299 | 0.0748444 | -3.544018274 |
| LPAR5 | 0.92086854 | 1.430942427 | 2.516027243 | 0.019723234 | 0.074982087 | -3.545975579 |
| KCNS3 | 0.968393097 | 4.552644944 | 2.515992089 | 0.01972475 | 0.074982087 | -3.546044584 |
| MND1 | 1.508614829 | 2.443510642 | 2.514213855 | 0.01980155 | 0.07521115 | -3.549534484 |
| CDK5R1 | 0.697605102 | 1.602230851 | 2.513996055 | 0.019810976 | 0.075231239 | -3.54996184 |
| PKP3 | 0.87101321 | 5.979943633 | 2.512490061 | 0.019876265 | 0.075431919 | -3.552916284 |
| KCNMB1 | -0.848862722 | 1.348931556 | -2.512240778 | 0.019887092 | 0.075444999 | -3.553405234 |
| SLC7A1 | 1.373164388 | 4.082872404 | 2.511939048 | 0.019900203 | 0.075475515 | -3.553997018 |
| ZNF236 | 0.787741851 | 1.45038488 | 2.510846035 | 0.019947768 | 0.075576206 | -3.556140435 |
| EPHB1 | -1.479756782 | -1.494927017 | -2.510070032 | 0.019981601 | 0.075633549 | -3.557661886 |
| CEBPA | 0.889560845 | 4.183471529 | 2.509625656 | 0.020001 | 0.075668666 | -3.558533029 |
| SLC33A1 | 0.592148807 | 4.233394199 | 2.509394805 | 0.020011085 | 0.075690846 | -3.558985549 |
| LPAR1 | 0.638427274 | 3.780097275 | 2.50778894 | 0.020081367 | 0.075877776 | -3.562132795 |
| MEGF9 | 0.679415899 | 3.115106482 | 2.507198585 | 0.020107262 | 0.07595984 | -3.56328953 |
| ZNF501 | 0.593728934 | 1.452229379 | 2.506642345 | 0.020131689 | 0.076036325 | -3.564379284 |
| SMYD2 | 0.881005681 | 6.207831668 | 2.505854088 | 0.020166353 | 0.076151433 | -3.565923372 |
| MMP12 | 3.105053954 | #NAME? | 2.509062016 | 0.020439109 | 0.076948021 | -3.566884465 |
| TRERF1 | 0.919338272 | 2.667587473 | 2.504911636 | 0.020207871 | 0.076244884 | -3.567769164 |
| MED23 | 0.606081438 | 4.379610102 | 2.503515687 | 0.020269513 | 0.076445741 | -3.570502446 |
| USP29 | 1.161879369 | #NAME? | 2.553585545 | 0.024203485 | 0.085618474 | -3.572343535 |
| SH3BGRL3 | 0.613397378 | 7.889993226 | 2.502101339 | 0.020332146 | 0.076650168 | -3.573270916 |
| ODAD1 | 2.161251141 | 5.299012772 | 2.501105658 | 0.020376347 | 0.076800881 | -3.575219377 |
| DYNLT2B | 1.525951907 | 6.185240335 | 2.499811271 | 0.020433943 | 0.076948021 | -3.577751755 |
| POGLUT3 | 0.694483538 | 4.97450073 | 2.4998067 | 0.020434146 | 0.076948021 | -3.577760695 |
| LCN12 | 1.070386419 | 0.582595199 | 2.499658003 | 0.020440773 | 0.076948021 | -3.578051566 |
| CAD | 0.587681505 | 3.635954071 | 2.499039571 | 0.020468353 | 0.077019959 | -3.579261196 |
| NWD1 | 1.62311694 | 5.530059918 | 2.497813441 | 0.020523137 | 0.077162242 | -3.581658983 |
| PCM1 | 0.760235174 | 5.479458651 | 2.49719365 | 0.020550881 | 0.07723462 | -3.582870788 |
| FAM185A | 0.595714887 | 2.717540313 | 2.496944253 | 0.020562055 | 0.077260648 | -3.583358359 |
| SRD5A2 | 2.888171413 | 2.247955981 | 2.496129751 | 0.020598588 | 0.077365946 | -3.584950529 |
| BLM | 1.204750735 | 1.758200177 | 2.495889864 | 0.020609359 | 0.077374441 | -3.5854194 |
| TMEM86A | 0.878202885 | 1.483149293 | 2.49529809 | 0.020635952 | 0.077423905 | -3.586575951 |
| RFC5 | 0.695431131 | 3.666167455 | 2.495231032 | 0.020638967 | 0.077423905 | -3.586706998 |
| CKAP2L | 1.722442494 | 0.650004538 | 2.494778788 | 0.020659315 | 0.077482017 | -3.58759074 |
| ADGRG3 | 2.201916899 | 1.125467067 | 2.494482328 | 0.020672663 | 0.077494693 | -3.588170014 |
| CDK12 | 0.598414055 | 3.599506414 | 2.493855635 | 0.020700907 | 0.077574017 | -3.589394432 |
| ENAH | 0.605277291 | 4.600539056 | 2.493577605 | 0.020713449 | 0.077601626 | -3.589937586 |
| SREK1IP1 | 0.654132329 | 3.204231891 | 2.493503151 | 0.020716809 | 0.077601626 | -3.590083033 |
| ANKRD34C | -0.810588155 | #NAME? | -2.535332579 | 0.032353567 | 0.102017249 | -3.59079141 |
| PLAG1 | 1.364543833 | 1.340094466 | 2.492299153 | 0.020771211 | 0.077773369 | -3.592434728 |
| YAP1 | 0.723476986 | 5.468255135 | 2.491978851 | 0.020785707 | 0.077811622 | -3.593060251 |
| ICAM1 | 0.988935262 | 4.512863515 | 2.491837226 | 0.020792119 | 0.077818847 | -3.593336818 |
| SLC17A3 | 1.330888014 | #NAME? | 2.515035739 | 0.030967727 | 0.099461696 | -3.593879831 |
| FAM90A1 | 0.834323392 | 0.328603215 | 2.491343569 | 0.020814484 | 0.077871262 | -3.594300774 |
| SLFN12 | 0.633605414 | 2.628333641 | 2.490983271 | 0.020830821 | 0.077916355 | -3.595004256 |
| TLR1 | 0.946834547 | 2.601683152 | 2.490013751 | 0.020874843 | 0.078048909 | -3.596896974 |
| LAIR1 | 0.781794566 | 4.161932107 | 2.489360805 | 0.020904539 | 0.078127815 | -3.598171442 |
| KHNYN | 0.587794915 | 4.869270384 | 2.48819855 | 0.020957496 | 0.07828057 | -3.600439573 |
| LACC1 | 0.69466023 | 3.260506155 | 2.488180386 | 0.020958325 | 0.07828057 | -3.600475015 |
| MIPOL1 | 1.109188704 | 3.212774228 | 2.487683427 | 0.020981007 | 0.078349199 | -3.601444647 |
| SFXN1 | 0.650159438 | 4.50064562 | 2.487170305 | 0.021004452 | 0.078404548 | -3.602445704 |
| IL18R1 | 1.01059265 | 2.88520547 | 2.486819865 | 0.021020477 | 0.078448265 | -3.60312932 |
| KIF16B | 0.733977524 | 2.786240728 | 2.486676399 | 0.021027041 | 0.078456661 | -3.603409167 |
| AFF4 | 0.65397792 | 4.316961458 | 2.486464195 | 0.021036753 | 0.078460816 | -3.603823083 |
| DUSP15 | -1.022985261 | 1.81394453 | -2.486202272 | 0.021048747 | 0.078489339 | -3.604333951 |
| PRRT3 | 1.252800087 | 3.297536827 | 2.485418345 | 0.021084681 | 0.078575003 | -3.605862787 |
| DHRS3 | 0.769368745 | 8.306263585 | 2.485032026 | 0.021102411 | 0.078595465 | -3.606616101 |
| SLC44A5 | -1.130905047 | -1.752039271 | -2.485026737 | 0.021102654 | 0.078595465 | -3.606626413 |
| TACR2 | 1.1207151 | -2.16811189 | 2.484891184 | 0.021108878 | 0.078600749 | -3.606890724 |
| TBC1D12 | 0.628524 | 2.440820731 | 2.484334898 | 0.02113444 | 0.07864762 | -3.607975325 |
| ENPP4 | 0.745454955 | 4.491855117 | 2.483598941 | 0.021168302 | 0.078741406 | -3.609410031 |
| NKRF | 0.62364627 | 2.897702914 | 2.483473425 | 0.021174082 | 0.078741411 | -3.609654694 |
| GRM2 | -1.623114271 | -1.282370607 | -2.483215577 | 0.02118596 | 0.078742783 | -3.610157285 |
| H2BC13 | 1.280772945 | #NAME? | 2.380640741 | 0.036746398 | 0.111336277 | -3.610651938 |
| WFDC13 | -1.167154332 | #NAME? | -2.448474592 | 0.027262121 | 0.092102718 | -3.612295603 |
| NAALAD2 | -1.018838096 | 0.928743614 | -2.481511543 | 0.021264619 | 0.078970657 | -3.613478037 |
| ATXN7L3B | 0.730749989 | 4.609594433 | 2.481510426 | 0.021264671 | 0.078970657 | -3.613480214 |
| NQO1 | 1.284803196 | 6.574856954 | 2.481354999 | 0.021271859 | 0.078981223 | -3.613783042 |
| PRH2 | -1.530355599 | -2.786960056 | -2.481225806 | 0.021277836 | 0.078987287 | -3.614034749 |
| SERPINE1 | 2.112281063 | 3.811163987 | 2.480436066 | 0.021314404 | 0.079106887 | -3.615573245 |
| MXD1 | 0.91621205 | 3.196520948 | 2.47996633 | 0.021336182 | 0.079171558 | -3.616488213 |
| TGFBR3 | -1.064381765 | 2.681520013 | -2.478754127 | 0.021392479 | 0.079364264 | -3.61884895 |
| LNPEP | 0.612717688 | 3.359473855 | 2.478045952 | 0.021425432 | 0.079419636 | -3.620227813 |
| GON7 | 1.180367187 | 6.020932453 | 2.477589255 | 0.021446708 | 0.079419636 | -3.621116919 |
| ATP2A2 | 0.864639094 | 6.487093986 | 2.477373383 | 0.021456772 | 0.079440727 | -3.621537149 |
| GLIPR1L1 | -0.601910587 | 0.523210254 | -2.476599385 | 0.021492891 | 0.079558256 | -3.623043707 |
| TMEM54 | 0.604255042 | 6.136631941 | 2.476282941 | 0.021507674 | 0.079596776 | -3.623659579 |
| WFDC3 | 1.931575291 | 1.764385591 | 2.476143441 | 0.021514194 | 0.079604706 | -3.623931064 |
| TTL | 0.622428201 | 3.415381659 | 2.475954181 | 0.021523043 | 0.079621248 | -3.624299375 |
| CD86 | 1.186729818 | 2.166583122 | 2.475587553 | 0.021540194 | 0.079668489 | -3.62501281 |
| AGR2 | 0.716874765 | 10.07503595 | 2.475358206 | 0.021550929 | 0.079691987 | -3.625459076 |
| ASB9 | 0.910663188 | 1.860664826 | 2.475160591 | 0.021560183 | 0.079696337 | -3.62584358 |
| OVOL3 | 1.608030655 | #NAME? | 2.440262081 | 0.027703954 | 0.093059497 | -3.626656872 |
| SERPINB2 | 3.969691374 | 3.818349953 | 2.474670823 | 0.021583134 | 0.079746216 | -3.62679646 |
| SCN11A | -1.083822613 | 0.295002988 | -2.4739728 | 0.021615884 | 0.079847965 | -3.628154335 |
| CALU | 0.754166598 | 5.326585763 | 2.473129144 | 0.021655528 | 0.079948726 | -3.629795237 |
| NCAPG | 2.245860773 | 1.454682061 | 2.472253756 | 0.021696734 | 0.080056279 | -3.631497531 |
| LRRC10B | 2.55982406 | 5.088186547 | 2.472229726 | 0.021697866 | 0.080056279 | -3.631544255 |
| CHM | 0.736201797 | 2.633056844 | 2.471983703 | 0.021709461 | 0.080082811 | -3.632022615 |
| HID1 | -0.710351311 | 4.828622159 | -2.471189838 | 0.021746913 | 0.080155932 | -3.633566001 |
| SETSIP | 0.71751035 | #NAME? | 2.463030364 | 0.030096023 | 0.097649646 | -3.633877403 |
| TIMM8A | 0.643411548 | 2.528034999 | 2.470827975 | 0.021764005 | 0.080200193 | -3.634269425 |
| KIF4A | 1.853652701 | 1.167209535 | 2.470373961 | 0.021785467 | 0.080241402 | -3.635151901 |
| UBXN4 | 0.682882957 | 6.343657736 | 2.469695959 | 0.021817554 | 0.080302376 | -3.636469582 |
| LIG1 | 0.650905141 | 4.501183506 | 2.469583577 | 0.021822877 | 0.080305714 | -3.636687973 |
| ACE2 | 0.975269581 | 1.710019913 | 2.469098168 | 0.021845881 | 0.080345129 | -3.637631209 |
| CDRT1 | 1.200513295 | 1.205098467 | 2.469013161 | 0.021849912 | 0.080345129 | -3.637796383 |
| AREL1 | 0.5982245 | 3.714807431 | 2.46898475 | 0.02185126 | 0.080345129 | -3.637851586 |
| LOC105372412 | 1.330677626 | #NAME? | 2.489484151 | 0.023549536 | 0.084153214 | -3.637957148 |
| LIMS2 | -1.164940047 | 4.53790995 | -2.468685964 | 0.021865434 | 0.080376948 | -3.638432114 |
| ESYT1 | 0.605272643 | 5.305998277 | 2.468102206 | 0.021893153 | 0.08041787 | -3.639566221 |
| CSPP1 | 1.05104926 | 4.132503737 | 2.467941572 | 0.021900786 | 0.080429662 | -3.639878271 |
| CBL | 1.571032994 | 0.093860125 | 2.467653933 | 0.02191446 | 0.080463632 | -3.640437013 |
| SLC10A5 | -0.737701272 | 0.473446139 | -2.46712554 | 0.0219396 | 0.080533718 | -3.641463329 |
| KBTBD11 | -1.225360914 | 0.34407655 | -2.466572539 | 0.02196594 | 0.080533718 | -3.642537315 |
| SNAPC3 | 0.623244753 | 4.831314477 | 2.466457014 | 0.021971447 | 0.080533718 | -3.642761659 |
| NDC1 | 0.777575032 | 3.46282773 | 2.466235976 | 0.021981985 | 0.080533718 | -3.643190888 |
| CCL16 | -1.046880469 | 0.828997471 | -2.464738325 | 0.022053516 | 0.080680999 | -3.646098601 |
| UBR1 | 0.667037 | 2.932299694 | 2.46431345 | 0.022073849 | 0.080706677 | -3.646923324 |
| RHOV | 0.903954311 | 6.985144956 | 2.463671308 | 0.022104611 | 0.080755874 | -3.648169638 |
| SFXN2 | 0.656743746 | 3.77524201 | 2.463623298 | 0.022106913 | 0.080755874 | -3.648262813 |
| CFAP46 | 2.373485444 | 2.731498184 | 2.463200343 | 0.022127199 | 0.080788041 | -3.649083607 |
| RCAN3 | 0.742693009 | 4.211435713 | 2.462636894 | 0.02215425 | 0.080855391 | -3.650176924 |
| REV1 | 0.682574501 | 4.825174154 | 2.462630909 | 0.022154537 | 0.080855391 | -3.650188537 |
| PDPK1 | 0.776643387 | 4.044975082 | 2.461966628 | 0.022186469 | 0.080923211 | -3.651477333 |
| GRIK3 | -2.493888539 | #NAME? | -2.507222566 | 0.026410395 | 0.090352527 | -3.652622131 |
| HSPA1L | 0.807943341 | 1.736133589 | 2.460546204 | 0.022254893 | 0.081091461 | -3.654232507 |
| MAB21L4 | 1.979467949 | 4.052763166 | 2.459178343 | 0.02232097 | 0.081263032 | -3.6568849 |
| BAIAP2L1 | 0.841292901 | 5.791690161 | 2.459058566 | 0.022326764 | 0.081263032 | -3.65711712 |
| CTSC | 1.394742018 | 8.214912763 | 2.4587587 | 0.022341278 | 0.081282321 | -3.657698459 |
| CCDC18 | 0.85138857 | 1.297234305 | 2.45842541 | 0.022357419 | 0.081318405 | -3.658344553 |
| PRKDC | 0.689342091 | 3.936815512 | 2.457618742 | 0.022396531 | 0.081413115 | -3.659908102 |
| SLC45A2 | -1.43888863 | #NAME? | -2.464406657 | 0.02298014 | 0.082723046 | -3.660119795 |
| DNAJB14 | 0.682329282 | 3.635714597 | 2.457279461 | 0.022413001 | 0.081439127 | -3.660565641 |
| B3GNTL1 | 0.734849476 | 3.210522711 | 2.456763931 | 0.022438047 | 0.081508563 | -3.66156466 |
| SERTAD2 | 0.654732496 | 4.145258955 | 2.456581002 | 0.022446941 | 0.081508563 | -3.661919121 |
| ADCY7 | 1.347751415 | 2.053723997 | 2.456517307 | 0.022450038 | 0.081508563 | -3.662042538 |
| DRC1 | 3.135911839 | 5.640167082 | 2.456112756 | 0.022469721 | 0.081563741 | -3.662826373 |
| PCNA | 0.819924673 | 6.925689826 | 2.455938698 | 0.022478194 | 0.081564952 | -3.663163594 |
| STS | 0.909512501 | 2.45527037 | 2.45580384 | 0.022484761 | 0.081564952 | -3.663424862 |
| ESRP1 | 0.708843057 | 5.453675516 | 2.455753636 | 0.022487206 | 0.081564952 | -3.663522122 |
| SOS2 | 0.618151397 | 3.564230034 | 2.455737455 | 0.022487995 | 0.081564952 | -3.66355347 |
| MYO7A | 1.450548564 | 0.497816557 | 2.455002525 | 0.022523819 | 0.081664946 | -3.664977125 |
| LYSMD3 | 0.680584028 | 3.788782413 | 2.454502874 | 0.022548205 | 0.081734435 | -3.665944879 |
| ABCG5 | 1.416635227 | #NAME? | 2.457407155 | 0.022841845 | 0.082420992 | -3.666653905 |
| PLPPR3 | 2.880265842 | 4.04363039 | 2.45384379 | 0.02258041 | 0.081818557 | -3.667221267 |
| KCNE1B | 2.335853607 | #NAME? | 2.386241374 | 0.026584751 | 0.090741418 | -3.668344983 |
| PTDSS1 | 0.636689982 | 4.6340953 | 2.453203773 | 0.022611724 | 0.0819157 | -3.668460548 |
| OAS3 | 1.3729825 | 3.157893453 | 2.452890143 | 0.022627084 | 0.081955018 | -3.669067773 |
| MMP16 | -1.601846852 | -2.804455438 | -2.452735159 | 0.022634678 | 0.081966198 | -3.669367825 |
| LRRC29 | 0.881336635 | 0.144154088 | 2.452469374 | 0.022647706 | 0.081997049 | -3.669882366 |
| ARHGEF12 | 0.611113367 | 4.575147818 | 2.45217131 | 0.022662325 | 0.082033645 | -3.670459359 |
| COL7A1 | 1.231837423 | 6.263158974 | 2.451682903 | 0.022686298 | 0.082104081 | -3.671404733 |
| SERPINB10 | 3.520398421 | 3.156950148 | 2.451479033 | 0.022696311 | 0.082123979 | -3.671799319 |
| MYADML2 | -1.226258054 | #NAME? | -2.458071895 | 0.02329085 | 0.083543867 | -3.672179964 |
| SIPA1L1 | 0.615146137 | 4.326553106 | 2.450914642 | 0.022724055 | 0.082175412 | -3.672891592 |
| RBMXL1 | 0.677287649 | 3.369677959 | 2.45031626 | 0.022753504 | 0.082249099 | -3.674049496 |
| ZNF264 | 0.590082549 | 2.809886044 | 2.449781656 | 0.022779844 | 0.082311591 | -3.675083854 |
| RIBC2 | 2.087694622 | 4.574933734 | 2.449548066 | 0.022791362 | 0.082328599 | -3.675535767 |
| ZNF93 | 0.916271776 | 1.35233917 | 2.449502587 | 0.022793605 | 0.082328599 | -3.675623751 |
| KCNE3 | 1.48096715 | 5.888802979 | 2.449376552 | 0.022799822 | 0.082334703 | -3.67586757 |
| NLN | 0.925776427 | 2.398153467 | 2.44899796 | 0.022818508 | 0.082385821 | -3.676599933 |
| CENPA | 2.171330154 | 1.177413418 | 2.448828031 | 0.022826899 | 0.082396965 | -3.676928627 |
| CDCA5 | 1.853628539 | 2.316974449 | 2.448289164 | 0.022853529 | 0.082446791 | -3.677970883 |
| LCT | 1.331259654 | #NAME? | 2.323411261 | 0.038775585 | 0.115004352 | -3.67835981 |
| CCDC9B | -0.853599492 | 2.494163481 | -2.447831509 | 0.022876168 | 0.08246657 | -3.678855961 |
| ANKRD18B | 1.035448853 | 0.70155317 | 2.447720052 | 0.022881684 | 0.08246657 | -3.679071499 |
| TBX2 | -0.667346088 | 3.586507734 | -2.447295658 | 0.022902701 | 0.082525961 | -3.679892149 |
| ASIC2 | 1.514877665 | -2.50895933 | 2.446753246 | 0.022929589 | 0.082606479 | -3.680940898 |
| SPACA4 | 0.686182163 | 3.569197786 | 2.44653563 | 0.022940385 | 0.082626934 | -3.681361619 |
| SYNPO | 0.745822604 | 5.128248645 | 2.446455641 | 0.022944354 | 0.082626934 | -3.681516259 |
| PAK1IP1 | 0.746098627 | 4.985913382 | 2.446147236 | 0.022959664 | 0.082665699 | -3.682112459 |
| KRT1 | 2.352891039 | #NAME? | 2.382457746 | 0.027314953 | 0.092246932 | -3.682336322 |
| ANXA13 | 1.560177824 | -1.173230772 | 2.444601423 | 0.023036545 | 0.08287357 | -3.685100155 |
| RBM18 | 0.59206726 | 4.053261748 | 2.444576512 | 0.023037786 | 0.08287357 | -3.685148294 |
| FOXI3 | 2.123932504 | -0.578388527 | 2.444528389 | 0.023040183 | 0.08287357 | -3.685241287 |
| TIA1 | 0.619724716 | 5.9212767 | 2.442237863 | 0.023154558 | 0.083219131 | -3.68966634 |
| CENPI | 1.136231305 | 0.864921739 | 2.442036209 | 0.023164653 | 0.083238961 | -3.690055803 |
| MYOCD | -2.230782829 | -2.393639248 | -2.44188436 | 0.023172257 | 0.08324383 | -3.690349064 |
| HACD2 | 0.72573053 | 4.67988471 | 2.4411991 | 0.023206602 | 0.083323842 | -3.69167236 |
| KRT79 | 1.395030958 | #NAME? | 2.438727441 | 0.033172034 | 0.103689689 | -3.692171853 |
| LGI2 | 1.656634465 | -1.161520388 | 2.439936088 | 0.023270026 | 0.083502111 | -3.694110804 |
| DNAI2 | 2.734432597 | 4.97854515 | 2.439615197 | 0.023286166 | 0.083543543 | -3.694730223 |
| ENGASE | 0.595035657 | 4.777458607 | 2.438667532 | 0.023333891 | 0.083632272 | -3.696559246 |
| PPP1R14C | 1.920586097 | 4.284112876 | 2.438305993 | 0.023352123 | 0.083664638 | -3.697256923 |
| OR10Z1 | 1.361654167 | #NAME? | 2.467108122 | 0.026284353 | 0.090105042 | -3.69876247 |
| FAM228A | -1.136382869 | #NAME? | -2.440562164 | 0.02368067 | 0.084425929 | -3.698950757 |
| VWA2 | 0.869677362 | 3.789999019 | 2.436982119 | 0.023418994 | 0.083871176 | -3.699811166 |
| STK36 | 0.738797673 | 4.655547302 | 2.436846507 | 0.023425855 | 0.083879226 | -3.700072769 |
| GJB5 | 1.036980344 | 4.843496502 | 2.436724795 | 0.023432013 | 0.083884762 | -3.70030755 |
| RP1 | 2.377639093 | 2.750080018 | 2.436105581 | 0.023463368 | 0.083969806 | -3.70150191 |
| KIAA2012 | 2.397866924 | 2.465414028 | 2.435952205 | 0.02347114 | 0.083969806 | -3.701797718 |
| FAM174A | 0.917163935 | 6.399942859 | 2.434741502 | 0.023532578 | 0.08412885 | -3.704132389 |
| RNASEH2A | 0.731246038 | 4.93862978 | 2.434502228 | 0.023544738 | 0.084153214 | -3.704593717 |
| JARID2 | 0.682813344 | 2.941278776 | 2.433849675 | 0.023577929 | 0.084224754 | -3.705851737 |
| CIB2 | 0.822915917 | 3.77495322 | 2.433552919 | 0.023593038 | 0.084262173 | -3.706423774 |
| ADRA1A | -1.084199933 | 0.768600807 | -2.433171223 | 0.023612484 | 0.084274357 | -3.707159487 |
| PDE4DIP | 0.831183822 | 4.215791907 | 2.432134797 | 0.023665362 | 0.084388322 | -3.709156854 |
| PANK1 | 0.723199794 | 2.176149512 | 2.43149814 | 0.023697899 | 0.084470794 | -3.710383565 |
| HSD17B2 | -1.076576845 | 5.235484942 | -2.431178806 | 0.023714234 | 0.08450943 | -3.71099879 |
| GOLT1A | -0.872630362 | 2.390151198 | -2.430699309 | 0.023738782 | 0.084550233 | -3.711922499 |
| TBX20 | 1.97839412 | #NAME? | 2.473241229 | 0.039053688 | 0.115540973 | -3.712225773 |
| PARPBP | 1.109757953 | 1.960078775 | 2.430490251 | 0.023749492 | 0.084555912 | -3.712325197 |
| TNRC6B | 0.602867045 | 2.468398145 | 2.430486675 | 0.023749675 | 0.084555912 | -3.712332086 |
| CD1B | 1.918031755 | #NAME? | 2.433333856 | 0.024049331 | 0.085222357 | -3.712772903 |
| ATOH7 | -1.300502071 | -1.224430972 | -2.43025687 | 0.023761454 | 0.084581287 | -3.712774727 |
| LPAR3 | 0.9659981 | 3.878771503 | 2.429685767 | 0.023790748 | 0.084638319 | -3.713874662 |
| HSPA4L | 0.765425711 | 2.794972098 | 2.429611777 | 0.023794546 | 0.084638319 | -3.714017155 |
| ATP2C2 | 1.16778993 | 6.429122112 | 2.429531137 | 0.023798685 | 0.084638319 | -3.714172452 |
| KIF2A | 0.702142288 | 4.143371292 | 2.429441685 | 0.023803278 | 0.084638319 | -3.714344716 |
| USP1 | 0.630205746 | 4.730770091 | 2.427439352 | 0.023906301 | 0.084922778 | -3.718199816 |
| NPDC1 | -0.889529928 | 6.36575771 | -2.427391756 | 0.023908755 | 0.084922778 | -3.718291432 |
| C11orf96 | -1.716806145 | 4.247122923 | -2.427104964 | 0.023923546 | 0.084942134 | -3.718843443 |
| LRIG1 | 0.636866689 | 6.52111702 | 2.426949243 | 0.023931581 | 0.084951208 | -3.719143155 |
| CKB | 1.424053453 | 7.230419827 | 2.426602077 | 0.023949503 | 0.084951367 | -3.7198113 |
| CR1L | 1.956618183 | #NAME? | 2.434501624 | 0.025029692 | 0.087234569 | -3.723750086 |
| RAD51 | 1.435196243 | 1.763014167 | 2.424418228 | 0.024062525 | 0.085242558 | -3.724013034 |
| WDR27 | 0.642134854 | 4.469527898 | 2.424381965 | 0.024064406 | 0.085242558 | -3.724082786 |
| FBXL7 | 0.70536616 | 3.462934267 | 2.423280862 | 0.024121584 | 0.085395197 | -3.726200491 |
| HSPBP1 | 1.011405576 | 6.341325524 | 2.422699225 | 0.024151838 | 0.085476238 | -3.727318913 |
| KLHL24 | 0.677896344 | 3.64364958 | 2.422660071 | 0.024153876 | 0.085476238 | -3.727394196 |
| ODF4 | -1.389606598 | #NAME? | -2.272611532 | 0.039523039 | 0.116342828 | -3.728782949 |
| ZBBX | 2.679866871 | 4.346597607 | 2.421928732 | 0.024191969 | 0.085594388 | -3.728800249 |
| PODNL1 | 0.956616683 | 2.831441807 | 2.421569451 | 0.024210704 | 0.085625553 | -3.729490906 |
| SPA17 | 1.931331646 | 5.612068787 | 2.421488965 | 0.024214903 | 0.085625553 | -3.72964562 |
| S1PR5 | 1.31421463 | 3.558439958 | 2.420811813 | 0.024250254 | 0.085717225 | -3.730947149 |
| IFI30 | 1.253708583 | 7.707868654 | 2.420355618 | 0.024274098 | 0.085784831 | -3.73182387 |
| CDC14A | 1.052169314 | 3.183408251 | 2.419477746 | 0.024320041 | 0.085847102 | -3.733510715 |
| JAK1 | 0.607216592 | 5.70698857 | 2.419378117 | 0.02432526 | 0.085848862 | -3.733702132 |
| RTL5 | 0.719337205 | 1.944249871 | 2.418581845 | 0.024367011 | 0.085956477 | -3.735231849 |
| PIM2 | 1.332125564 | 5.574142183 | 2.418526178 | 0.024369933 | 0.085956477 | -3.735338779 |
| ZBTB34 | 0.614740762 | 2.201110367 | 2.417726556 | 0.024411931 | 0.085995534 | -3.736874627 |
| C20orf203 | -0.786431481 | -0.290217134 | -2.417705591 | 0.024413033 | 0.085995534 | -3.73691489 |
| ANTXR1 | 0.79596589 | 4.611212734 | 2.417398919 | 0.024429159 | 0.085995534 | -3.73750384 |
| SEL1L | 0.705362977 | 4.229764782 | 2.417151672 | 0.024442167 | 0.085995534 | -3.737978638 |
| NDRG4 | -0.846484968 | 2.496723841 | -2.417080369 | 0.024445919 | 0.085995534 | -3.73811556 |
| NRARP | 1.056337039 | 4.913288187 | 2.417011987 | 0.024449519 | 0.085995534 | -3.738246869 |
| VSIG4 | 1.446681943 | 3.508577723 | 2.416977967 | 0.024451309 | 0.085995534 | -3.738312195 |
| BBC3 | 0.714128396 | 2.777589131 | 2.416966065 | 0.024451936 | 0.085995534 | -3.738335048 |
| ST3GAL4 | -0.708282058 | 5.617989791 | -2.415516299 | 0.024528368 | 0.086219697 | -3.741118417 |
| MS4A7 | 0.988576312 | 3.37846838 | 2.415153525 | 0.024547528 | 0.086264995 | -3.74181475 |
| PGF | 1.092474306 | 4.107155654 | 2.414205655 | 0.024597656 | 0.08639159 | -3.743633879 |
| DZIP3 | 1.272199888 | 4.62679045 | 2.413849454 | 0.024616518 | 0.08640083 | -3.744317386 |
| RANBP6 | 0.585253165 | 3.773595194 | 2.413602797 | 0.024629588 | 0.086414553 | -3.744790659 |
| ZNF623 | 0.668730149 | 2.652895271 | 2.413541207 | 0.024632852 | 0.086414553 | -3.74490883 |
| RAP1GAP | -1.608994178 | 2.945365717 | -2.413377132 | 0.02464155 | 0.086428396 | -3.745223631 |
| ATP1A2 | -1.496581766 | 2.452829357 | -2.413023892 | 0.024660286 | 0.086458309 | -3.745901326 |
| GOT1 | 0.659993801 | 5.725167523 | 2.4128579 | 0.024669095 | 0.086458309 | -3.746219765 |
| C20orf85 | 2.904130373 | 7.760101431 | 2.411947332 | 0.024717469 | 0.086577792 | -3.747966375 |
| VCX3B | -2.172704355 | #NAME? | -2.3934485 | 0.03415703 | 0.105786742 | -3.74811205 |
| SHROOM2 | 0.810636781 | 2.406789675 | 2.411743727 | 0.024728298 | 0.086599042 | -3.748356871 |
| SMIM38 | -0.900062755 | -0.048906022 | -2.411507795 | 0.024740851 | 0.086626323 | -3.748809343 |
| GXYLT2 | 0.737420681 | 2.24109625 | 2.411363956 | 0.024748508 | 0.08663645 | -3.749085187 |
| C8orf89 | 1.778017544 | #NAME? | 2.414153794 | 0.025053581 | 0.087284371 | -3.749341604 |
| NPM2 | 1.187528974 | 3.045333918 | 2.411118961 | 0.024761553 | 0.086665436 | -3.749554998 |
| SCIN | 1.421231712 | 5.017442938 | 2.410933568 | 0.024771429 | 0.086683319 | -3.749910495 |
| TFF2 | -1.678929181 | #NAME? | -2.42344641 | 0.026232737 | 0.089995953 | -3.751556649 |
| HELZ | 0.649908426 | 2.581731316 | 2.409664839 | 0.024839114 | 0.086886733 | -3.752342919 |
| TRANK1 | 0.925875527 | 2.985470518 | 2.408583092 | 0.024896958 | 0.087063656 | -3.754416285 |
| EMSY | 0.617572625 | 2.720526035 | 2.40845155 | 0.024904001 | 0.087063656 | -3.754668374 |
| KIF3C | 0.804310603 | 1.714636147 | 2.408361141 | 0.024908842 | 0.087063656 | -3.754841631 |
| LAMP5 | 1.985816551 | 5.627919988 | 2.408033761 | 0.024926381 | 0.087069465 | -3.755468978 |
| TMPO | 0.877319966 | 5.330049232 | 2.407495676 | 0.024955232 | 0.087115639 | -3.756499989 |
| TFAM | 0.779271216 | 3.897226933 | 2.407458127 | 0.024957246 | 0.087115639 | -3.75657193 |
| ZNF41 | 0.701763014 | 2.46047961 | 2.40714604 | 0.024973995 | 0.087138771 | -3.757169847 |
| REEP4 | 0.905598715 | 5.042468512 | 2.40662128 | 0.025002181 | 0.087186154 | -3.758175118 |
| SLC2A5 | 0.688244702 | 2.284753446 | 2.406546271 | 0.025006212 | 0.087186154 | -3.758318802 |
| FAIM | 0.650132639 | 5.063501974 | 2.40625113 | 0.02502208 | 0.087224756 | -3.758884131 |
| CPNE6 | -1.026655919 | #NAME? | -2.470075233 | 0.033431774 | 0.10419713 | -3.758904476 |
| PLK1 | 1.39667611 | 3.234627623 | 2.405908644 | 0.025040506 | 0.087255534 | -3.759540101 |
| FAXC | 1.107264791 | 2.01700206 | 2.40550818 | 0.025062066 | 0.087297209 | -3.760307049 |
| C19orf18 | -0.774155747 | 2.594712196 | -2.405188698 | 0.025079278 | 0.087299534 | -3.760918852 |
| NEMF | 0.675558649 | 3.963505059 | 2.405058266 | 0.025086309 | 0.087299534 | -3.761168614 |
| PPP1R32 | 1.779174106 | 4.589779944 | 2.405042274 | 0.025087171 | 0.087299534 | -3.761199236 |
| RRS1 | 0.602954972 | 4.050256019 | 2.40496936 | 0.025091102 | 0.087299534 | -3.761338854 |
| SLC35E4 | 0.619151291 | 1.908792295 | 2.404961313 | 0.025091536 | 0.087299534 | -3.761354264 |
| SPDYC | 0.73196816 | #NAME? | 2.375923804 | 0.033763587 | 0.104965277 | -3.762664557 |
| CEACAM7 | 2.317910167 | 1.577871769 | 2.404196941 | 0.02513278 | 0.087392876 | -3.762817759 |
| NAV3 | -1.716818617 | -1.371498575 | -2.403950396 | 0.025146097 | 0.087422466 | -3.763289749 |
| BATF3 | 1.029894762 | 2.345281361 | 2.40299873 | 0.025197561 | 0.087535037 | -3.765111372 |
| RRM1 | 0.858917163 | 5.528538143 | 2.402926116 | 0.025201492 | 0.087535037 | -3.76525035 |
| SDC4 | 0.592245956 | 7.395891859 | 2.402826739 | 0.025206872 | 0.087535037 | -3.765440543 |
| CYTL1 | 2.598268662 | 2.355043291 | 2.402817792 | 0.025207357 | 0.087535037 | -3.765457667 |
| NUP210 | 0.989482531 | 3.850171325 | 2.40230321 | 0.025235235 | 0.087615116 | -3.766442437 |
| ABCA12 | 2.097591746 | -1.765742233 | 2.400935692 | 0.02530946 | 0.087789021 | -3.769058915 |
| EPN3 | 0.857060406 | 4.282872784 | 2.400836648 | 0.025314844 | 0.08779095 | -3.769248384 |
| PARP9 | 1.140870398 | 5.449941618 | 2.400471599 | 0.025334695 | 0.08779863 | -3.769946674 |
| MPP4 | 1.674304006 | -1.228902835 | 2.400040048 | 0.025358182 | 0.087857479 | -3.770772097 |
| ACOT1 | -0.633014986 | 2.907140862 | -2.399080813 | 0.025410461 | 0.088005073 | -3.772606513 |
| HAVCR2 | 0.96803485 | 3.048129565 | 2.398814008 | 0.025425019 | 0.088037416 | -3.77311667 |
| FDCSP | -4.991819279 | #NAME? | -2.399218514 | 0.025862392 | 0.089084713 | -3.777707581 |
| ZC2HC1A | 0.921289054 | 4.010199336 | 2.395869267 | 0.025586216 | 0.088546322 | -3.778745158 |
| RGS12 | 0.646203818 | 5.735732671 | 2.395397417 | 0.025612133 | 0.088600325 | -3.779646673 |
| PLAUR | 1.056270734 | 4.695199556 | 2.395319113 | 0.025616436 | 0.088600325 | -3.779796269 |
| CENPE | 2.183329427 | -0.353480462 | 2.395143627 | 0.025626083 | 0.088616835 | -3.78013152 |
| ITGA10 | -1.596755464 | 2.271101973 | -2.39465209 | 0.02565312 | 0.088679582 | -3.781070484 |
| SDCBP2 | 1.168220567 | 4.804653817 | 2.393872286 | 0.025696069 | 0.088744643 | -3.782559889 |
| SAMD4A | 0.945705222 | 2.418346285 | 2.393238458 | 0.025731026 | 0.088844589 | -3.783770281 |
| CRACD | 1.942552008 | 0.425548246 | 2.392563857 | 0.025768281 | 0.088954732 | -3.785058334 |
| INVS | 0.58560809 | 2.273260733 | 2.392417236 | 0.025776385 | 0.088954732 | -3.785338258 |
| NCAN | 1.92411181 | #NAME? | 2.236598015 | 0.042293157 | 0.121554135 | -3.78583375 |
| ZNF285 | 1.322386951 | -0.345417058 | 2.39213222 | 0.025792144 | 0.088954732 | -3.785882374 |
| NINJ2 | 0.785014415 | 3.01016238 | 2.391981654 | 0.025800473 | 0.088966137 | -3.786169801 |
| ZNF106 | 0.600294248 | 4.374337506 | 2.391576619 | 0.025822891 | 0.089019649 | -3.78694295 |
| HBG2 | -1.399348178 | #NAME? | -2.408029736 | 0.027783564 | 0.093172026 | -3.78731784 |
| SLC38A4 | 1.767939592 | -1.727859887 | 2.391179041 | 0.025844914 | 0.089068714 | -3.787701792 |
| LZTFL1 | 1.146126923 | 4.77595507 | 2.391056921 | 0.025851682 | 0.089075158 | -3.787934864 |
| GAS2L2 | 2.883798881 | 3.929598004 | 2.390779468 | 0.025867064 | 0.089084713 | -3.788464369 |
| B3GLCT | 0.647401357 | 3.082659175 | 2.390741855 | 0.02586915 | 0.089084713 | -3.788536149 |
| ITPKC | 0.619046132 | 5.246554414 | 2.389823445 | 0.025920133 | 0.089209603 | -3.790288627 |
| AHCYL2 | 0.863597479 | 4.368405834 | 2.389443691 | 0.025941241 | 0.089250983 | -3.791013147 |
| NANOG | -0.603043011 | 0.569579185 | -2.389342308 | 0.025946879 | 0.089250983 | -3.791206563 |
| TNN | -3.404278505 | #NAME? | -2.390843971 | 0.026326439 | 0.09018277 | -3.793570582 |
| AKAP3 | 0.968407627 | 0.797434895 | 2.388060705 | 0.026018247 | 0.089445717 | -3.793651149 |
| APAF1 | 0.910887178 | 3.056864387 | 2.387883831 | 0.026028111 | 0.089462625 | -3.793988469 |
| SENP1 | 0.740896217 | 2.691987876 | 2.387024211 | 0.026076098 | 0.089559948 | -3.795627657 |
| EIF2S3B | 1.326736173 | -2.310624444 | 2.386874082 | 0.026084488 | 0.089571845 | -3.7959139 |
| GPR146 | -0.964254547 | 2.639768284 | -2.386631074 | 0.026098072 | 0.089601575 | -3.796377208 |
| ACTN1 | 0.717243114 | 6.099034862 | 2.385546193 | 0.026158799 | 0.089776168 | -3.798445266 |
| SEMA3B | -0.751568912 | 4.195674692 | -2.385241244 | 0.026175892 | 0.089817881 | -3.799026479 |
| SLC39A8 | -1.024772697 | 5.036554651 | -2.383364242 | 0.026281329 | 0.090105042 | -3.80260299 |
| CFAP54 | 2.059870109 | 0.614302799 | 2.383100455 | 0.026296179 | 0.090128591 | -3.803105489 |
| CT55 | -1.208894444 | #NAME? | -2.385634366 | 0.026618993 | 0.090824202 | -3.803423088 |
| MTA2 | 0.604246051 | 6.266284833 | 2.382851119 | 0.026310222 | 0.09015973 | -3.803580433 |
| PSD2 | -1.343313625 | -2.2161149 | -2.382555808 | 0.026326863 | 0.09018277 | -3.804142915 |
| CDIP1 | 0.636740406 | 4.296173764 | 2.382019577 | 0.026357105 | 0.090237457 | -3.805164175 |
| PAQR5 | 1.554055556 | 1.433536777 | 2.381799611 | 0.02636952 | 0.090260886 | -3.805583065 |
| GCKR | 1.363582269 | #NAME? | 2.318044253 | 0.031848715 | 0.101029256 | -3.80648707 |
| EMB | 1.169954201 | 4.771127421 | 2.380654147 | 0.026434257 | 0.090414407 | -3.807764064 |
| PLEKHA2 | 0.652884659 | 4.335985874 | 2.380535106 | 0.026440993 | 0.090420441 | -3.807990687 |
| CFAP251 | 1.937978006 | 5.1541753 | 2.380220595 | 0.026458798 | 0.090464317 | -3.808589403 |
| ZDHHC21 | 0.625118693 | 2.595994242 | 2.379994161 | 0.026471624 | 0.090474149 | -3.809020423 |
| GRB14 | -1.959678517 | #NAME? | -2.382305522 | 0.026807503 | 0.091257019 | -3.809712417 |
[truncated: 120,561 more chars]
